# Supplementary material for: The long noncoding RNA Charme supervises cardiomyocyte maturation by controlling cell differentiation programs in the developing heart
Source: eLife. 2023 Mar 6;12:e81360. doi: 10.7554/eLife.81360 (PMC10023161; doi:10.7554/eLife.81360)
Supplement: Supplementary file 1. [file elife-81360-supp1.xlsx]

## Sheet: Sheet1
This table describe Charme Tss usage data collected from Zenbu genome browser.
Post Natal tissues			EMBRYONIC tissues
Sample	RLE		Sample	RLE
thymus N06	0.51		thymus E18	4.47
stomach N07	1.57		pancreas E14	1.24
skin N0	43.4		lung, embryo E15	17.64
pancreas N00	0.59		liver E13	0.77
lung N0	5.88		kidney E15	1.61
liver N10	0.5		intestine, E15	2.21
heart N0	316.34		heart E14	689.21
eyeball N0	12.41		forelimb E15	15.43
epididymis N30	2.46		eyeball E15	5.34
adrenal gland N0	1.48		adrenal gland E14	0.75
Charme expression time course
Sample	RLE
Mesoderm, embryo E8.5 : CNhs14148 ctss	0
heart, embryo E11 : CNhs10586 ctss	382.354
heart, embryo E12 : CNhs11015 ctss	320.128
heart, embryo E13 : CNhs11013 ctss	267.932
heart, embryo E14 : CNhs10597 ctss	478.461
heart, embryo E15 : CNhs11017 ctss	474.792
heart, embryo E16 : CNhs11021 ctss	353.734
heart, embryo E17 : CNhs11025 ctss	333.919
heart, neonate N00 : CNhs11213 ctss	284.44
heart, neonate N10 : CNhs11118 ctss	133.632
heart, neonate N20 : CNhs11127 ctss	89.036
heart, neonate N30 : CNhs11202 ctss	55.427
