# Supplementary material for: The long noncoding RNA Charme supervises cardiomyocyte maturation by controlling cell differentiation programs in the developing heart
Source: eLife. 2023 Mar 6;12:e81360. doi: 10.7554/eLife.81360 (PMC10023161; doi:10.7554/eLife.81360)
Supplement: Supplementary file 2. [file elife-81360-supp2.xls]

## Sheet: RNA-Seq Mapping Statistics
This table describe reads number before and after pre-processing and alignment steps.
	Pre-processing		Alignment
Samples	Reads number	Trimmed	Uniquely mapped reads number	Uniquely mapped reads %	Number of reads mapped to multiple loci	% of reads mapped to multiple loci	Number of reads mapped to too many loci
PN_WT_1_S1_R1	27046746	25949263	21334473	82.22%	3378801	13.02%	14958	0.06%
PN_WT_1_S1_R2	27046746	25949263	21334473	82.22%	3378801	13.02%	14958	0.06%
PN_WT_2_S2_R1	23258944	21864657	18086149	82.72%	2603399	11.91%	12592	0.06%
PN_WT_2_S2_R2	23258944	21864657	18086149	82.72%	2603399	11.91%	12592	0.06%
PN_WT_3_S3_R1	24316810	23203048	19285026	83.11%	2842925	12.25%	11812	0.05%
PN_WT_3_S3_R2	24316810	23203048	19285026	83.11%	2842925	12.25%	11812	0.05%
PN_KO_1_S4_R1	23347235	22514285	17770228	78.93%	3766956	16.73%	15538	0.07%
PN_KO_1_S4_R2	23347235	22514285	17770228	78.93%	3766956	16.73%	15538	0.07%
PN_KO_2_S5_R1	29152745	27919188	22847446	81.83%	3270912	11.72%	19165	0.07%
PN_KO_2_S5_R2	29152745	27919188	22847446	81.83%	3270912	11.72%	19165	0.07%

## Sheet: DEA_Charme_WT_VS_KO
gene_name	ensembl_gene_id	mean_FPKM_WT	mean_FPKM_KO	logFC	logCPM	LR	PValue	FDR	gene_biotype
Ucp3	ENSMUSG00000032942	15.9292	2.28835	-2.79039	5.0437	97.0663	6.70459e-23	9.97644e-19	protein_coding
Gm5436	ENSMUSG00000042962	6.80586	42.8749	2.65578	3.77337	55.9336	7.49608e-14	5.57709e-10	processed_pseudogene
Myl1	ENSMUSG00000061816	14.3593	44.2261	1.62388	5.77244	51.1431	8.58708e-13	4.25919e-09	protein_coding
Adig	ENSMUSG00000044405	0.0408013	7.313	7.19089	1.37176	44.1556	3.03284e-11	1.12821e-07	protein_coding
Myh8	ENSMUSG00000055775	0.174237	1.30072	2.90153	2.90821	42.1598	8.41099e-11	2.50311e-07	protein_coding
Tnnc2	ENSMUSG00000017300	0.0210762	3.52461	6.90633	0.384453	41.1488	1.41068e-10	3.4985e-07	protein_coding
Kif2c	ENSMUSG00000028678	2.54639	7.69171	1.59525	4.33365	40.449	2.01816e-10	4.28615e-07	protein_coding
Ncapg	ENSMUSG00000015880	1.5558	5.04825	1.69613	4.38581	40.1899	2.30438e-10	4.28615e-07	protein_coding
Ccna2	ENSMUSG00000027715	15.5075	53.9443	1.79829	6.97871	39.8077	2.80241e-10	4.63332e-07	protein_coding
Cenpe	ENSMUSG00000045328	1.88483	6.15133	1.70331	4.95408	38.171	6.48082e-10	9.64346e-07	protein_coding
Gm8116	ENSMUSG00000059422	1.9369	0.133637	-3.77404	0.664704	37.7487	8.04714e-10	1.08856e-06	processed_pseudogene
Spc25	ENSMUSG00000005233	6.17922	19.8486	1.6818	5.21579	37.3447	9.89917e-10	1.2275e-06	protein_coding
Tpx2	ENSMUSG00000027469	7.41531	20.2575	1.4489	5.87659	36.7766	1.32467e-09	1.51624e-06	protein_coding
Pdk4	ENSMUSG00000019577	95.5334	36.0224	-1.40714	7.97713	35.734	2.26182e-09	2.19127e-06	protein_coding
Slc25a34	ENSMUSG00000040740	35.4649	8.62266	-2.03441	6.04829	35.7083	2.29187e-09	2.19127e-06	protein_coding
Kif20a	ENSMUSG00000003779	10.5445	33.3159	1.65965	6.22204	35.6544	2.35621e-09	2.19127e-06	protein_coding
Rian	ENSMUSG00000097451	2.04137	5.09262	1.31789	5.8348	35.4619	2.6009e-09	2.1978e-06	processed_transcript
Cd24a	ENSMUSG00000047139	10.4817	52.1388	2.31487	6.1333	35.3172	2.80154e-09	2.1978e-06	protein_coding
Anxa3	ENSMUSG00000029484	5.54697	13.8118	1.31633	5.01522	35.3138	2.80633e-09	2.1978e-06	protein_coding
Scd4	ENSMUSG00000050195	20.8	6.53126	-1.66789	5.83331	35.1462	3.0585e-09	2.27553e-06	protein_coding
Retn	ENSMUSG00000012705	0.0106783	5.01844	8.38499	1.76553	33.5659	6.88911e-09	4.88143e-06	protein_coding
C330027C09Rik	ENSMUSG00000033031	2.40101	9.16127	1.92926	4.8598	33.3257	7.79452e-09	5.27193e-06	protein_coding
Cdk1	ENSMUSG00000019942	13.7963	41.7682	1.59758	6.428	32.9529	9.44174e-09	5.97442e-06	protein_coding
Ccnb1	ENSMUSG00000041431	7.21808	27.1468	1.9108	6.00165	32.9133	9.63616e-09	5.97442e-06	protein_coding
Nusap1	ENSMUSG00000027306	5.30068	17.0432	1.68319	5.34374	32.5761	1.14616e-08	6.67707e-06	protein_coding
Cenpf	ENSMUSG00000026605	1.98354	8.14815	2.03716	6.10136	32.5416	1.16669e-08	6.67707e-06	protein_coding
Kif11	ENSMUSG00000012443	7.03716	20.887	1.56835	5.92206	32.1114	1.45579e-08	8.023e-06	protein_coding
Mki67	ENSMUSG00000031004	10.0883	31.3812	1.63669	7.54853	30.883	2.74064e-08	1.45645e-05	protein_coding
Myl4	ENSMUSG00000061086	100.373	231.746	1.20721	9.47002	30.6891	3.02864e-08	1.554e-05	protein_coding
Ckap2l	ENSMUSG00000048327	8.44682	25.6796	1.60337	5.58956	30.5695	3.22112e-08	1.59767e-05	protein_coding
Mastl	ENSMUSG00000026779	1.08438	3.77976	1.79604	3.64542	30.2475	3.80282e-08	1.82535e-05	protein_coding
Birc5	ENSMUSG00000017716	6.79483	18.8258	1.46958	5.30515	30.0239	4.26752e-08	1.9844e-05	protein_coding
Depdc1a	ENSMUSG00000028175	2.30636	8.70723	1.91267	4.01577	29.8487	4.67119e-08	2.10628e-05	protein_coding
Gm9770	ENSMUSG00000040540	0.274701	2.71773	3.2459	0.099752	29.677	5.10377e-08	2.23365e-05	processed_pseudogene
Kif23	ENSMUSG00000032254	2.68257	6.58209	1.29486	5.07003	29.4784	5.6543e-08	2.40389e-05	protein_coding
Ckap2	ENSMUSG00000037725	5.40845	15.6112	1.52834	4.93353	29.3158	6.14916e-08	2.54165e-05	protein_coding
Esco2	ENSMUSG00000022034	1.87074	7.53674	2.00624	4.05196	29.2329	6.41797e-08	2.58107e-05	protein_coding
Prc1	ENSMUSG00000038943	5.8975	18.0865	1.61626	6.46975	29.1358	6.74787e-08	2.58157e-05	protein_coding
Mylpf	ENSMUSG00000030672	1.59143	9.43753	2.5762	2.36692	29.1305	6.76622e-08	2.58157e-05	protein_coding
Cks2	ENSMUSG00000062248	31.4247	93.7593	1.57605	5.28658	28.9939	7.26072e-08	2.64667e-05	protein_coding
Ankrd1	ENSMUSG00000024803	200.089	884.524	2.14418	9.70793	28.9854	7.29258e-08	2.64667e-05	protein_coding
Cep55	ENSMUSG00000024989	4.25349	11.6744	1.45566	4.33021	27.9709	1.23152e-07	4.26164e-05	protein_coding
Ckmt1	ENSMUSG00000000308	0.187244	2.2718	3.57555	1.44139	27.7553	1.37669e-07	4.65573e-05	protein_coding
Ect2	ENSMUSG00000027699	2.04398	6.86214	1.74419	4.41939	27.5405	1.53841e-07	5.08699e-05	protein_coding
Clstn3	ENSMUSG00000008153	0.061354	1.54758	4.62428	1.79314	27.4966	1.57369e-07	5.09056e-05	protein_coding
Knl1	ENSMUSG00000027326	0.909642	3.1547	1.78924	3.94954	27.3838	1.66823e-07	5.28153e-05	protein_coding
Sgo2a	ENSMUSG00000026039	2.3186	5.76264	1.31151	4.69779	26.9904	2.04471e-07	6.33861e-05	protein_coding
Ccl28	ENSMUSG00000074715	0.0474689	1.52401	4.97678	1.37002	26.2389	3.0168e-07	9.16121e-05	protein_coding
Ndc80	ENSMUSG00000024056	4.86532	13.8059	1.50065	4.2184	26.1247	3.20064e-07	9.16574e-05	protein_coding
Impa2	ENSMUSG00000024525	51.6277	22.4015	-1.2019	6.05472	26.103	3.23677e-07	9.16574e-05	protein_coding
Smgc	ENSMUSG00000047295	0	1514.24	19.5737	11.0124	26.0576	3.31388e-07	9.16574e-05	protein_coding
Kyat3	ENSMUSG00000040213	1.16082	3.14464	1.4347	4.22049	26.0568	3.3152e-07	9.16574e-05	protein_coding
Anln	ENSMUSG00000036777	3.50002	12.1895	1.79952	5.98227	26.0504	3.32628e-07	9.16574e-05	protein_coding
Bpifa2	ENSMUSG00000042459	0	3014.44	19.8037	11.2424	25.9795	3.45068e-07	9.33566e-05	protein_coding
Zim1	ENSMUSG00000002266	0.933835	2.55054	1.44736	3.68309	25.786	3.81445e-07	0.000101355	protein_coding
Pbk	ENSMUSG00000022033	8.27268	21.6537	1.38713	4.61188	25.6844	4.02063e-07	0.00010496	protein_coding
Tmem82	ENSMUSG00000043085	2.5358	0.592542	-2.07592	2.84167	25.2051	5.15464e-07	0.000132243	protein_coding
Kif20b	ENSMUSG00000024795	1.67448	4.93188	1.55445	4.0558	24.9118	6.00129e-07	0.000151355	protein_coding
Hmmr	ENSMUSG00000020330	3.85509	16.8142	2.12388	5.61668	24.8555	6.17911e-07	0.000153242	protein_coding
Cdca3	ENSMUSG00000023505	12.9823	35.6589	1.45759	5.98307	24.6938	6.72012e-07	0.000163927	protein_coding
Top2a	ENSMUSG00000020914	10.2862	32.0698	1.64011	7.41996	24.6556	6.85455e-07	0.000164509	protein_coding
Cenpi	ENSMUSG00000031262	1.27009	4.40776	1.79212	3.84415	24.6094	7.02078e-07	0.000165824	protein_coding
Spdl1	ENSMUSG00000069910	1.5488	4.78648	1.62275	3.3043	24.5573	7.21307e-07	0.000167704	protein_coding
Aspm	ENSMUSG00000033952	1.29208	3.81062	1.55796	4.73713	24.1963	8.70004e-07	0.000196146	protein_coding
Ky	ENSMUSG00000035606	4.55728	1.73234	-1.38854	4.34195	24.0766	9.25805e-07	0.000205612	protein_coding
Ucp2	ENSMUSG00000033685	47.0848	13.257	-1.82718	7.87444	23.8801	1.02529e-06	0.000224357	protein_coding
Pip	ENSMUSG00000058499	0	142.478	15.65	7.09145	23.8089	1.06392e-06	0.000229436	protein_coding
Anxa1	ENSMUSG00000024659	14.0091	50.4813	1.84998	6.22386	23.7061	1.12225e-06	0.000238557	protein_coding
Ttk	ENSMUSG00000038379	1.44652	3.7986	1.38797	3.5603	23.5609	1.2102e-06	0.00025363	protein_coding
Kpna2	ENSMUSG00000018362	23.9365	55.8072	1.22063	6.72028	23.405	1.31237e-06	0.000265971	protein_coding
Mis18bp1	ENSMUSG00000047534	1.19118	3.32057	1.47436	4.0327	23.3903	1.32242e-06	0.000265971	protein_coding
Dlgap5	ENSMUSG00000037544	2.09163	5.62617	1.42583	4.54604	23.3899	1.3227e-06	0.000265971	protein_coding
Adrb1	ENSMUSG00000035283	13.7516	5.6807	-1.26909	4.71955	23.2554	1.4185e-06	0.00028143	protein_coding
Smc4	ENSMUSG00000034349	13.5619	34.1898	1.33307	6.82884	23.2129	1.45025e-06	0.000283944	protein_coding
Ska1	ENSMUSG00000036223	1.38737	4.22095	1.60085	2.7625	23.1239	1.51892e-06	0.000290861	protein_coding
Fbp2	ENSMUSG00000021456	6.69316	1.58073	-2.04751	2.65728	23.1166	1.52467e-06	0.000290861	protein_coding
Capn6	ENSMUSG00000067276	6.64245	13.9704	1.07298	6.22368	22.9354	1.67536e-06	0.00030852	protein_coding
Rpl30	ENSMUSG00000058600	55.9972	116.963	1.06243	7.92378	22.9312	1.67907e-06	0.00030852	protein_coding
Cdc25c	ENSMUSG00000044201	2.63385	7.90892	1.58743	3.21306	22.9217	1.6874e-06	0.00030852	protein_coding
Psat1	ENSMUSG00000024640	5.44705	15.7319	1.52936	5.34682	22.9072	1.70018e-06	0.00030852	protein_coding
Mad2l1	ENSMUSG00000029910	2.80335	7.40994	1.40081	5.28569	22.8766	1.7274e-06	0.000309683	protein_coding
Hmgb2	ENSMUSG00000054717	31.4752	72.6082	1.20532	7.16966	22.8386	1.7619e-06	0.000310175	protein_coding
Slc36a2	ENSMUSG00000020264	0.750117	6.6551	3.1473	3.36902	22.8278	1.77183e-06	0.000310175	protein_coding
Bcl2l11	ENSMUSG00000027381	7.00436	3.30612	-1.08273	5.47529	22.7814	1.81518e-06	0.000314068	protein_coding
Rrm1	ENSMUSG00000030978	7.38083	19.8764	1.42868	7.09104	22.3612	2.25895e-06	0.000386359	protein_coding
Prol1	ENSMUSG00000064156	0	1074.3	17.5266	8.96594	22.1812	2.48087e-06	0.000418471	protein_coding
Mucl2	ENSMUSG00000036925	0.0554676	145.079	11.1132	5.20843	22.1507	2.5207e-06	0.000418471	protein_coding
Fam46b	ENSMUSG00000046694	4.06199	12.4317	1.60982	4.08681	22.1428	2.53108e-06	0.000418471	protein_coding
Neil3	ENSMUSG00000039396	1.20558	3.18774	1.39706	3.48013	22.0335	2.67937e-06	0.000438122	protein_coding
Shcbp1	ENSMUSG00000022322	1.55607	4.50865	1.53096	4.10911	21.6777	3.22514e-06	0.000516883	protein_coding
Vwa8	ENSMUSG00000058997	27.4186	12.5122	-1.13179	7.21706	21.6745	3.23052e-06	0.000516883	protein_coding
Pck1	ENSMUSG00000027513	0.0682445	7.92732	6.81224	3.49363	21.4237	3.68195e-06	0.000582845	protein_coding
Asns	ENSMUSG00000029752	1.86961	6.1087	1.71348	3.30583	21.3124	3.90206e-06	0.000604819	protein_coding
Nr4a3	ENSMUSG00000028341	0.269829	1.37015	2.33336	2.08548	21.2647	4.00039e-06	0.000611829	protein_coding
Hsd17b12	ENSMUSG00000027195	13.0633	26.2447	1.00585	5.46624	21.2439	4.04404e-06	0.000611829	protein_coding
Paqr9	ENSMUSG00000064225	4.88357	2.04525	-1.25088	4.97739	21.2313	4.07064e-06	0.000611829	protein_coding
Melk	ENSMUSG00000035683	3.14761	8.1227	1.36559	3.93714	21.08	4.40494e-06	0.000655454	protein_coding
Krt23	ENSMUSG00000006777	0.0447994	6.27235	7.01246	2.07043	21.0104	4.56807e-06	0.000672999	protein_coding
Lrrn3	ENSMUSG00000036295	0.534292	2.11357	1.97199	1.90105	20.9792	4.64288e-06	0.00067434	protein_coding
Car3	ENSMUSG00000027559	1.10197	69.6233	5.97822	6.35654	20.9077	4.81961e-06	0.000689575	protein_coding
Sec23b	ENSMUSG00000027429	3.87444	8.46132	1.12886	5.17366	20.8802	4.8891e-06	0.000692855	protein_coding
Prom1	ENSMUSG00000029086	0.441302	1.52747	1.79656	2.68308	20.7975	5.105e-06	0.000716162	protein_coding
Asf1b	ENSMUSG00000005470	5.73451	12.8267	1.15997	4.32984	20.7676	5.18523e-06	0.000716162	protein_coding
Sema3c	ENSMUSG00000028780	1.43427	3.1484	1.133	3.92751	20.7422	5.25445e-06	0.000717305	protein_coding
Kif4	ENSMUSG00000034311	3.54345	9.04246	1.35033	4.9868	20.5065	5.94291e-06	0.000803913	protein_coding
Knstrn	ENSMUSG00000027331	5.62151	15.7081	1.48202	5.63915	20.4109	6.24727e-06	0.000837471	protein_coding
Kcnb1	ENSMUSG00000050556	2.53857	1.13246	-1.15959	4.51323	20.3638	6.40292e-06	0.000850674	protein_coding
Smc2	ENSMUSG00000028312	4.32573	12.3443	1.51052	5.3672	20.2063	6.95254e-06	0.00091552	protein_coding
Bub1	ENSMUSG00000027379	3.14351	10.0977	1.6819	4.68947	20.0562	7.52009e-06	0.000981569	protein_coding
Hmgn5	ENSMUSG00000031245	7.69429	21.1204	1.45297	4.66092	19.9201	8.07457e-06	0.00104478	protein_coding
Agtr2	ENSMUSG00000068122	0.782592	4.22881	2.43376	2.88103	19.8984	8.16696e-06	0.00104762	protein_coding
Cfd	ENSMUSG00000061780	0.0533446	41.726	9.40538	3.97274	19.8818	8.23794e-06	0.0010477	protein_coding
Cnn1	ENSMUSG00000001349	8.19965	16.8432	1.03975	4.99936	19.833	8.45102e-06	0.00106569	protein_coding
Car13	ENSMUSG00000027555	0.457867	1.82425	1.98989	1.27811	19.8003	8.59684e-06	0.00107497	protein_coding
Prkar2b	ENSMUSG00000002997	1.52584	12.9216	3.08125	4.48709	19.7471	8.83946e-06	0.00109609	protein_coding
Zfp948	ENSMUSG00000067931	2.26975	6.41682	1.49177	3.36557	19.6874	9.11992e-06	0.00112152	protein_coding
Nuf2	ENSMUSG00000026683	2.64243	7.99211	1.59531	4.92286	19.491	1.01074e-05	0.00123277	protein_coding
G2e3	ENSMUSG00000035293	1.17685	3.17008	1.42464	3.96311	19.4379	1.03924e-05	0.00125723	protein_coding
Dcpp1	ENSMUSG00000096445	0.0535641	74.0057	10.1463	4.21391	19.3956	1.06253e-05	0.00127504	protein_coding
3110056K07Rik	ENSMUSG00000085622	12.1763	2.28758	-2.41627	3.64637	19.2383	1.15378e-05	0.001361	processed_transcript
Acot1	ENSMUSG00000072949	104.769	33.7036	-1.63412	6.89699	19.2317	1.15773e-05	0.001361	protein_coding
Krt19	ENSMUSG00000020911	2.96997	10.3308	1.79636	3.46988	19.1536	1.20612e-05	0.00139712	protein_coding
Plk4	ENSMUSG00000025758	1.65229	3.57596	1.11351	4.05976	19.1455	1.21121e-05	0.00139712	protein_coding
Dio2	ENSMUSG00000007682	0.802292	2.11193	1.39986	2.96594	19.1073	1.23572e-05	0.00140362	protein_coding
A2ml1	ENSMUSG00000047228	0.00843869	50.9239	12.4028	7.30608	19.0758	1.25629e-05	0.00140553	protein_coding
Tmem88b	ENSMUSG00000073680	2.25415	0.630467	-1.85804	2.51029	18.8629	1.4046e-05	0.00154679	protein_coding
Kif18a	ENSMUSG00000027115	0.422662	1.22736	1.53036	2.88254	18.8601	1.40662e-05	0.00154679	protein_coding
Zdhhc2	ENSMUSG00000039470	2.50535	6.58544	1.39047	4.51711	18.8505	1.41373e-05	0.00154679	protein_coding
Tceal8	ENSMUSG00000051579	34.4791	71.8906	1.05936	6.98614	18.7878	1.46096e-05	0.0015753	protein_coding
AW551984	ENSMUSG00000038112	0.859829	2.02718	1.23769	3.02822	18.5833	1.62635e-05	0.00174102	protein_coding
Elovl6	ENSMUSG00000041220	0.689732	2.19389	1.67578	3.07775	18.4242	1.76794e-05	0.00187907	protein_coding
Ttpa	ENSMUSG00000073988	0.163531	1.22751	2.9075	1.1523	18.4081	1.78298e-05	0.00188161	protein_coding
Adamts7	ENSMUSG00000032363	7.01	3.27407	-1.09317	5.1205	18.3139	1.87331e-05	0.00196301	protein_coding
Rxfp1	ENSMUSG00000034009	0.581143	3.03496	2.38017	3.9689	18.2966	1.89047e-05	0.00196714	protein_coding
Sec11c	ENSMUSG00000024516	4.53425	10.341	1.1915	4.41031	18.157	2.03423e-05	0.00208754	protein_coding
Car6	ENSMUSG00000028972	0.0289589	96.7154	11.5408	6.141	18.1084	2.0868e-05	0.00212682	protein_coding
Arxes2	ENSMUSG00000048040	5.9228	13.0879	1.14671	3.76135	18.0672	2.13246e-05	0.00213568	protein_coding
Tcea3	ENSMUSG00000001604	36.8839	18.6166	-0.988362	5.37609	18.063	2.1372e-05	0.00213568	protein_coding
Phgdh	ENSMUSG00000053398	4.07129	10.0497	1.307	4.01567	18.0618	2.13855e-05	0.00213568	protein_coding
S100a10	ENSMUSG00000041959	49.0737	98.8415	1.00926	6.38677	18.0462	2.1561e-05	0.00213885	protein_coding
Dbf4	ENSMUSG00000002297	1.52867	3.46953	1.18002	4.33399	17.98	2.23243e-05	0.00219991	protein_coding
Sgo1	ENSMUSG00000023940	1.59922	3.93391	1.29565	3.2801	17.9163	2.30839e-05	0.00225979	protein_coding
Nek2	ENSMUSG00000026622	2.49848	6.13853	1.29702	4.16355	17.862	2.37522e-05	0.00228455	protein_coding
Bub1b	ENSMUSG00000040084	7.30053	15.3347	1.0702	5.49213	17.8583	2.37974e-05	0.00228455	protein_coding
Acot2	ENSMUSG00000021226	88.0021	36.8462	-1.25466	7.21401	17.8421	2.40018e-05	0.00228941	protein_coding
Kif15	ENSMUSG00000036768	0.800672	1.92269	1.25876	3.78842	17.8275	2.41865e-05	0.00229233	protein_coding
Efnb3	ENSMUSG00000003934	76.6715	39.6629	-0.950628	7.62247	17.8124	2.43792e-05	0.00229597	protein_coding
Lockd	ENSMUSG00000098318	1.25197	3.33332	1.41026	3.59842	17.6752	2.62019e-05	0.00243678	lincRNA
Cenpl	ENSMUSG00000026708	0.813233	1.9891	1.28743	2.88408	17.6431	2.66485e-05	0.00246292	protein_coding
Npc1	ENSMUSG00000024413	4.96768	2.41912	-1.03516	5.40865	17.5737	2.76383e-05	0.00253863	protein_coding
Rbfox1	ENSMUSG00000008658	4.90528	2.16625	-1.18152	3.99476	17.5227	2.83893e-05	0.00259161	protein_coding
Tbc1d16	ENSMUSG00000039976	17.4614	9.33165	-0.903544	6.66227	17.4667	2.92384e-05	0.00264098	protein_coding
Cul9	ENSMUSG00000040327	2.44344	1.19611	-1.02633	4.57564	17.4354	2.97237e-05	0.00264098	protein_coding
Oxct1	ENSMUSG00000022186	65.4673	166.24	1.34435	8.6129	17.4192	2.99778e-05	0.00264098	protein_coding
Gk	ENSMUSG00000025059	3.33811	6.46472	0.95142	5.15383	17.4102	3.012e-05	0.00264098	protein_coding
Wnt9a	ENSMUSG00000000126	2.37958	0.846535	-1.47729	2.58888	17.4069	3.01724e-05	0.00264098	protein_coding
Plin1	ENSMUSG00000030546	0.0752863	8.71337	6.82273	4.05934	17.3083	3.17799e-05	0.00275632	protein_coding
Ifi27	ENSMUSG00000064215	7.00344	28.0407	2.00176	4.51046	17.3035	3.18607e-05	0.00275632	protein_coding
Podxl2	ENSMUSG00000033152	13.0929	6.50293	-1.00674	5.91302	17.2385	3.29692e-05	0.00283573	protein_coding
Cldn3	ENSMUSG00000070473	0.335295	12.3255	5.17555	2.74396	17.207	3.35206e-05	0.00286659	protein_coding
Dcpp3	ENSMUSG00000057417	0.0585712	72.7523	10.0512	4.17381	17.0233	3.69239e-05	0.00310859	protein_coding
Rftn1	ENSMUSG00000039316	13.9789	7.172	-0.960334	5.6674	17.0206	3.69772e-05	0.00310859	protein_coding
Meg3	ENSMUSG00000021268	1.33309	4.27176	1.67937	5.50725	17.0016	3.73482e-05	0.00312214	lincRNA
Mlph	ENSMUSG00000026303	0.218883	2.59117	3.56076	2.69428	16.9461	3.84562e-05	0.0031968	protein_coding
Thra	ENSMUSG00000058756	60.391	32.731	-0.883362	7.83113	16.9192	3.90052e-05	0.00322443	protein_coding
Arhgef39	ENSMUSG00000051517	1.5341	4.10965	1.42548	2.79542	16.8595	4.02508e-05	0.00330902	protein_coding
Prpmp5	ENSMUSG00000107874	0	12.153	11.2202	2.71449	16.7739	4.21075e-05	0.00344264	protein_coding
Spag5	ENSMUSG00000002055	2.79919	6.0657	1.11657	4.53431	16.7391	4.28889e-05	0.00348736	protein_coding
Cenpw	ENSMUSG00000075266	1.58909	4.01801	1.33455	3.43709	16.6491	4.49724e-05	0.0036369	protein_coding
Arl6ip1	ENSMUSG00000030654	28.5565	52.7647	0.885322	6.56959	16.6204	4.56578e-05	0.00367237	protein_coding
Slc10a6	ENSMUSG00000029321	1.08449	3.82026	1.80223	2.21727	16.4984	4.86916e-05	0.00389533	protein_coding
Cadm4	ENSMUSG00000054793	9.21159	4.27054	-1.10241	3.97837	16.4156	5.08651e-05	0.00404299	protein_coding
Mrc1	ENSMUSG00000026712	2.01803	4.13598	1.03353	4.19717	16.4076	5.10808e-05	0.00404299	protein_coding
Eno1	ENSMUSG00000063524	72.9546	168.711	1.20937	9.22516	16.376	5.19392e-05	0.00407373	protein_coding
Ube2c	ENSMUSG00000001403	18.4307	43.3961	1.23589	6.20865	16.3643	5.22594e-05	0.00407373	protein_coding
Hmgcs2	ENSMUSG00000027875	229.905	14.1908	-4.01807	8.88476	16.3632	5.22904e-05	0.00407373	protein_coding
Wfdc18	ENSMUSG00000000983	0.330998	44.4999	7.05045	4.47439	16.3031	5.39752e-05	0.00418307	protein_coding
Padi2	ENSMUSG00000028927	0.0860826	1.29832	3.89997	1.61891	16.2765	5.47389e-05	0.00422029	protein_coding
H2afz	ENSMUSG00000037894	66.0124	134.259	1.02377	7.37307	16.2499	5.55113e-05	0.00425777	protein_coding
Kif22	ENSMUSG00000030677	3.80623	8.41248	1.14603	4.79618	16.2364	5.59092e-05	0.0042663	protein_coding
Rph3al	ENSMUSG00000020847	11.1259	5.65869	-0.978652	5.09647	16.1248	5.93031e-05	0.00449122	protein_coding
Tuba1c	ENSMUSG00000043091	20.3131	42.1664	1.05354	5.8457	16.1198	5.94604e-05	0.00449122	protein_coding
Ptp4a3	ENSMUSG00000059895	133.504	67.681	-0.979736	8.95179	16.051	6.16581e-05	0.0046337	protein_coding
Mlycd	ENSMUSG00000074064	56.4627	27.6032	-1.03089	7.06022	16.0009	6.33116e-05	0.00471453	protein_coding
Mgarp	ENSMUSG00000037161	0.197305	1.33116	2.73937	0.471377	15.9958	6.34827e-05	0.00471453	protein_coding
Ccnb2	ENSMUSG00000032218	20.9952	47.1488	1.16741	5.59183	15.9889	6.37136e-05	0.00471453	protein_coding
Fignl1	ENSMUSG00000035455	2.37771	5.52418	1.21255	4.14028	15.9804	6.4001e-05	0.00471453	protein_coding
Bmp10	ENSMUSG00000030046	4.77766	10.2304	1.09866	4.96929	15.9515	6.49866e-05	0.00476355	protein_coding
Hbb-bt	ENSMUSG00000073940	144.983	308.838	1.09028	7.20996	15.921	6.60402e-05	0.00479355	protein_coding
Ldha	ENSMUSG00000063229	266.444	576.731	1.11401	10.3363	15.8895	6.71518e-05	0.00485058	protein_coding
Nppb	ENSMUSG00000029019	127.576	587.038	2.20194	7.92555	15.8731	6.77355e-05	0.00486416	protein_coding
Gcat	ENSMUSG00000006378	0.993633	2.84901	1.52134	2.75416	15.8659	6.79937e-05	0.00486416	protein_coding
Sptb	ENSMUSG00000021061	11.5474	6.3298	-0.86725	6.84601	15.8355	6.90937e-05	0.00491921	protein_coding
Anxa2	ENSMUSG00000032231	61.9146	128.292	1.05082	8.36682	15.7753	7.13294e-05	0.00505419	protein_coding
Adamtsl4	ENSMUSG00000015850	7.90052	3.82114	-1.04286	4.72531	15.667	7.55304e-05	0.00530138	protein_coding
Ddah1	ENSMUSG00000028194	2.69789	5.79215	1.10002	3.97732	15.6471	7.63297e-05	0.00530587	protein_coding
Tmed5	ENSMUSG00000063406	2.71434	5.07509	0.901915	4.81858	15.6435	7.64746e-05	0.00530587	protein_coding
2610035D17Rik	ENSMUSG00000087259	1.44676	0.307117	-2.19285	1.15877	15.6214	7.73746e-05	0.00530587	lincRNA
Acot7	ENSMUSG00000028937	41.3254	22.7467	-0.860091	6.17232	15.6213	7.73773e-05	0.00530587	protein_coding
Gm42047	ENSMUSG00000110631	0.913595	2.34857	1.35337	3.07839	15.6097	7.78548e-05	0.00531413	lincRNA
Pdk2	ENSMUSG00000038967	112.527	58.638	-0.939798	8.16932	15.5792	7.91183e-05	0.00536652	protein_coding
Pclaf	ENSMUSG00000040204	3.2857	9.65196	1.55231	4.8106	15.5739	7.93437e-05	0.00536652	protein_coding
Ggh	ENSMUSG00000073987	5.63709	11.0846	0.975662	3.94977	15.5521	8.02605e-05	0.00540396	protein_coding
Pak3	ENSMUSG00000031284	0.486538	1.35461	1.46779	3.00063	15.5276	8.13093e-05	0.0054345	protein_coding
Gm11273	ENSMUSG00000079941	42.5642	90.2471	1.08411	4.59193	15.5245	8.14444e-05	0.0054345	protein_coding
2700099C18Rik	ENSMUSG00000098090	1.41225	3.83353	1.43348	2.39612	15.3944	8.72445e-05	0.00572562	transcribed_unprocessed_pseudogene
Chd3	ENSMUSG00000018474	10.6687	5.85083	-0.86534	6.20815	15.3932	8.73005e-05	0.00572562	protein_coding
Tceal9	ENSMUSG00000042712	103.887	203.82	0.971652	7.22146	15.3922	8.73464e-05	0.00572562	protein_coding
Pgk1	ENSMUSG00000062070	200.035	461.575	1.20622	9.41714	15.3824	8.78036e-05	0.00573034	protein_coding
Cenpc1	ENSMUSG00000029253	2.09585	4.20926	1.00372	4.05661	15.3423	8.96865e-05	0.00578733	protein_coding
Scd1	ENSMUSG00000037071	1.20778	18.5504	3.93996	5.30838	15.3411	8.97413e-05	0.00578733	protein_coding
Pop4	ENSMUSG00000030423	6.49469	13.3317	1.03472	4.71978	15.339	8.98436e-05	0.00578733	protein_coding
R3hdm2	ENSMUSG00000025404	24.7039	13.5158	-0.869022	6.92171	15.2919	9.21126e-05	0.00590791	protein_coding
Ip6k3	ENSMUSG00000024210	1.66673	0.473809	-1.86146	1.51207	15.2403	9.46627e-05	0.00604541	protein_coding
Eln	ENSMUSG00000029675	127.642	50.2119	-1.34586	9.61284	15.1857	9.74386e-05	0.0061961	protein_coding
Pink1	ENSMUSG00000028756	134.268	72.045	-0.897773	8.19231	15.1739	9.80501e-05	0.00620845	protein_coding
F13a1	ENSMUSG00000039109	2.39737	5.71271	1.25487	3.88258	15.1257	0.000100584	0.0063419	protein_coding
Mllt6	ENSMUSG00000038437	15.0531	8.49388	-0.825045	6.53508	15.0425	0.000105118	0.00659983	protein_coding
Ube2t	ENSMUSG00000026429	2.0294	4.59021	1.17333	3.88733	14.9773	0.000108812	0.00679921	protein_coding
Efcab11	ENSMUSG00000021176	0.834463	2.75656	1.72071	1.75068	14.9636	0.000109603	0.00679921	protein_coding
Stk17b	ENSMUSG00000026094	2.87241	6.62469	1.20212	4.50511	14.9626	0.000109665	0.00679921	protein_coding
Gas2l3	ENSMUSG00000074802	1.16718	2.79342	1.25567	3.62135	14.9238	0.00011194	0.0069115	protein_coding
Eif1a	ENSMUSG00000057561	9.98137	18.3041	0.872973	5.26287	14.7314	0.000123967	0.00762242	protein_coding
Kdm6b	ENSMUSG00000018476	12.7676	6.15614	-1.04993	6.14012	14.6811	0.00012732	0.00777985	protein_coding
Nucb2	ENSMUSG00000030659	2.98124	11.3138	1.92531	3.89678	14.6724	0.000127908	0.00777985	protein_coding
Alg8	ENSMUSG00000035704	2.05414	4.86119	1.23835	3.15294	14.6696	0.000128096	0.00777985	protein_coding
Tpd52l1	ENSMUSG00000000296	3.98321	9.63033	1.28013	3.06682	14.6205	0.000131479	0.00795288	protein_coding
Lpo	ENSMUSG00000009356	0.00516366	24.2615	11.6739	4.94092	14.6082	0.000132335	0.00797222	protein_coding
4930452B06Rik	ENSMUSG00000021747	4.09974	8.49632	1.04795	3.97856	14.4482	0.000144067	0.00864405	protein_coding
Thbs1	ENSMUSG00000040152	5.3376	10.3209	0.952706	5.47993	14.416	0.000146555	0.00873961	protein_coding
Tmem94	ENSMUSG00000020747	24.8952	13.5458	-0.876749	6.91448	14.4102	0.000147004	0.00873961	protein_coding
Tm6sf1	ENSMUSG00000038623	1.85037	4.05537	1.12726	4.02	14.4048	0.000147422	0.00873961	protein_coding
Casq1	ENSMUSG00000007122	16.9776	47.8235	1.49449	5.83917	14.3503	0.000151756	0.00896082	protein_coding
Cdc45	ENSMUSG00000000028	4.13721	9.5639	1.20526	3.83229	14.3296	0.000153433	0.00899409	protein_coding
Stk26	ENSMUSG00000031112	0.436376	1.35526	1.62818	2.11502	14.3284	0.000153528	0.00899409	protein_coding
Atcayos	ENSMUSG00000085779	41.2775	22.606	-0.86796	7.2099	14.3106	0.000154987	0.00904398	antisense_RNA
Shroom3	ENSMUSG00000029381	8.39808	4.50169	-0.8977	6.49061	14.2736	0.000158067	0.00915187	protein_coding
Adra1b	ENSMUSG00000050541	21.5297	9.19947	-1.22247	5.81464	14.2331	0.000161509	0.00929126	protein_coding
Cyb5a	ENSMUSG00000024646	19.1103	33.0816	0.791285	5.7284	14.2306	0.000161723	0.00929126	protein_coding
Tst	ENSMUSG00000044986	15.6272	29.045	0.894938	4.52965	14.22	0.000162636	0.00929196	protein_coding
BC067074	ENSMUSG00000021763	1.31079	0.589708	-1.15977	3.12389	14.2159	0.000162984	0.00929196	protein_coding
Hba-a2	ENSMUSG00000069917	182.866	311.868	0.770152	7.28986	14.1532	0.000168511	0.00957037	protein_coding
Ctgf	ENSMUSG00000019997	30.0101	103.013	1.77893	7.40412	14.0786	0.000175331	0.00984953	protein_coding
Irx3	ENSMUSG00000031734	28.7342	14.4067	-0.993486	5.99253	14.0777	0.000175412	0.00984953	protein_coding
Krt8	ENSMUSG00000049382	1.42852	47.397	5.04856	5.1711	14.0608	0.000176994	0.00986628	protein_coding
S100b	ENSMUSG00000033208	0.43569	1.87566	2.11989	0.70885	14.0571	0.000177339	0.00986628	protein_coding
Fbln5	ENSMUSG00000021186	9.83321	4.61437	-1.08947	5.50118	14.0533	0.000177699	0.00986628	protein_coding
Fam111a	ENSMUSG00000024691	3.58311	7.78604	1.11605	4.44345	14.036	0.000179345	0.00992063	protein_coding
Parpbp	ENSMUSG00000035365	1.46576	3.944	1.42567	3.14832	13.9947	0.000183325	0.010066	protein_coding
Bnip3	ENSMUSG00000078566	37.1299	83.0227	1.16012	6.97405	13.9418	0.000188556	0.0103151	protein_coding
Sost	ENSMUSG00000001494	6.10494	2.09227	-1.53476	3.23942	13.8903	0.000193792	0.0105242	protein_coding
Epcam	ENSMUSG00000045394	0.0489314	13.993	8.0567	3.5537	13.8738	0.000195502	0.0105785	protein_coding
Aurka	ENSMUSG00000027496	5.82631	12.5374	1.10743	4.43485	13.8546	0.000197516	0.0106446	protein_coding
Prdx4	ENSMUSG00000025289	27.2422	49.0232	0.846633	6.24387	13.8485	0.000198156	0.0106446	protein_coding
Kif14	ENSMUSG00000041498	0.453095	1.09693	1.27537	2.89467	13.7852	0.000204945	0.0109261	protein_coding
Gm15682	ENSMUSG00000095524	1.08871	0.0464043	-3.97418	-1.20376	13.7792	0.000205598	0.0109261	processed_pseudogene
Uts2b	ENSMUSG00000056423	0.730075	2.82782	1.94815	0.518186	13.7636	0.000207317	0.0109782	protein_coding
Rab11fip3	ENSMUSG00000037098	7.04788	3.83568	-0.874103	5.29476	13.6972	0.000214778	0.011333	protein_coding
Fabp3-ps1	ENSMUSG00000056366	36.718	17.8524	-1.04026	4.26721	13.6773	0.000217063	0.011413	processed_pseudogene
Igfbp3	ENSMUSG00000020427	10.9901	20.8559	0.925701	5.55069	13.6419	0.000221192	0.0115892	protein_coding
Stil	ENSMUSG00000028718	0.989486	2.68366	1.43479	3.27523	13.6044	0.000225655	0.0117098	protein_coding
Hnrnpdl	ENSMUSG00000029328	25.1422	43.6457	0.795506	7.29358	13.6033	0.000225788	0.0117098	protein_coding
Hsp90aa1	ENSMUSG00000021270	45.9413	107.126	1.2211	8.11281	13.6027	0.000225855	0.0117098	protein_coding
Isg20	ENSMUSG00000039236	0.871867	2.4643	1.49728	1.54204	13.5393	0.000233623	0.0119873	protein_coding
Aldh1a7	ENSMUSG00000024747	0.41812	6.27886	3.898	2.56948	13.479	0.000241242	0.0122934	protein_coding
Hba-a1	ENSMUSG00000069919	283.162	479.122	0.758742	8.19804	13.441	0.000246184	0.0125024	protein_coding
Atp1b2	ENSMUSG00000041329	15.1762	7.8362	-0.950337	5.64794	13.4115	0.000250087	0.0126575	protein_coding
St14	ENSMUSG00000031995	0.0927001	1.20365	3.69014	2.11166	13.3621	0.00025676	0.0129512	protein_coding
Fkbp11	ENSMUSG00000003355	4.71503	11.71	1.32052	2.48901	13.3412	0.000259635	0.0130519	protein_coding
Fancd2	ENSMUSG00000034023	0.536502	1.69999	1.65825	2.99081	13.315	0.000263293	0.0131913	protein_coding
Adck2	ENSMUSG00000046947	4.72532	2.02872	-1.20659	3.86278	13.2972	0.000265801	0.0132722	protein_coding
Fndc5	ENSMUSG00000001334	53.1337	29.095	-0.869519	6.91126	13.2559	0.000271717	0.0134813	protein_coding
Itm2a	ENSMUSG00000031239	71.2181	120.706	0.761207	7.3112	13.2554	0.000271801	0.0134813	protein_coding
Nrp2	ENSMUSG00000025969	4.65847	2.55295	-0.86576	5.50182	13.2317	0.000275249	0.013607	protein_coding
Klhdc8b	ENSMUSG00000032609	14.9001	8.69028	-0.777435	6.70954	13.1676	0.00028483	0.0139877	protein_coding
Gm11914	ENSMUSG00000082674	1.80204	5.62674	1.62512	0.817689	13.1418	0.000288784	0.0140497	processed_pseudogene
Tnnt3	ENSMUSG00000061723	0.638511	2.94769	2.2107	1.40164	13.1409	0.000288925	0.0140497	protein_coding
Cdo1	ENSMUSG00000033022	3.79856	17.5924	2.21189	3.85285	13.12	0.000292163	0.0140847	protein_coding
Ube2l6	ENSMUSG00000027078	9.08418	18.4587	1.01932	4.68237	13.1176	0.000292529	0.0140847	protein_coding
Rnaseh2b	ENSMUSG00000021932	3.53278	7.05852	0.995546	4.9502	13.1073	0.000294152	0.0140847	protein_coding
B3gnt5	ENSMUSG00000022686	0.97221	3.86376	1.98646	3.46249	13.0424	0.000304518	0.014463	protein_coding
Sbk1	ENSMUSG00000042978	23.9305	13.8889	-0.783535	6.39753	13.0376	0.000305307	0.014463	protein_coding
Tuft1	ENSMUSG00000005968	1.26521	2.81411	1.14967	2.57283	13.0323	0.000306172	0.014463	protein_coding
Ncapg2	ENSMUSG00000042029	2.1059	4.68279	1.14874	4.37475	13.0216	0.000307924	0.0144997	protein_coding
Rtn2	ENSMUSG00000030401	16.5013	8.31655	-0.989848	5.92542	12.9993	0.000311611	0.0146271	protein_coding
Trip13	ENSMUSG00000021569	2.17998	4.9858	1.18964	3.48805	12.959	0.000318381	0.0148978	protein_coding
Sytl1	ENSMUSG00000028860	0.0985671	1.20596	3.57126	0.629092	12.9398	0.000321672	0.0149728	protein_coding
Mib2	ENSMUSG00000029060	7.99282	4.43739	-0.847954	4.96198	12.9332	0.000322805	0.0149728	protein_coding
Flrt3	ENSMUSG00000051379	0.496854	1.33711	1.41564	2.03448	12.9321	0.000323002	0.0149728	protein_coding
Cks1b	ENSMUSG00000028044	25.659	47.6506	0.892409	5.28041	12.9178	0.000325477	0.0150407	protein_coding
Bhlhe40	ENSMUSG00000030103	7.31038	3.84655	-0.921062	4.8077	12.8741	0.000333154	0.0153245	protein_coding
Npr2	ENSMUSG00000028469	9.88079	5.41504	-0.86396	5.24455	12.8712	0.000333678	0.0153245	protein_coding
Bhlha15	ENSMUSG00000052271	0.0138993	3.36009	7.70654	2.3126	12.8385	0.000339566	0.0155469	protein_coding
Tmem37	ENSMUSG00000050777	1.17302	3.14716	1.42759	1.41177	12.831	0.000340922	0.0155611	protein_coding
Gm11802	ENSMUSG00000086052	1.04621	0.0885691	-3.48948	-0.849303	12.8079	0.000345163	0.0157065	antisense_RNA
Snrpd1	ENSMUSG00000002477	32.0218	63.5542	0.986553	5.22516	12.7901	0.000348451	0.0158078	protein_coding
Hic2	ENSMUSG00000050240	2.85735	1.4235	-1.00401	3.87149	12.7488	0.000356246	0.0161123	protein_coding
Gramd4	ENSMUSG00000035900	12.9806	7.4005	-0.810021	5.90603	12.7206	0.000361643	0.0163068	protein_coding
Lrp3	ENSMUSG00000001802	2.75436	1.15214	-1.24026	3.33301	12.7144	0.000362844	0.0163115	protein_coding
Hsd17b7	ENSMUSG00000026675	10.046	5.25637	-0.938495	5.37883	12.7084	0.000364013	0.0163148	protein_coding
Garnl3	ENSMUSG00000038860	1.02652	0.430961	-1.23893	3.30443	12.6969	0.000366265	0.0163665	protein_coding
Hlf	ENSMUSG00000003949	5.3227	2.77942	-0.934126	4.85283	12.6682	0.000371924	0.0165695	protein_coding
Krt18	ENSMUSG00000023043	4.08553	78.0424	4.25424	5.56642	12.6573	0.00037411	0.0166172	protein_coding
Prim1	ENSMUSG00000025395	2.83673	6.55168	1.20357	4.06596	12.6374	0.000378114	0.016745	protein_coding
Sobp	ENSMUSG00000038248	3.96928	2.06036	-0.94001	4.158	12.5987	0.000386009	0.017033	protein_coding
Gm15446	ENSMUSG00000090015	0.404799	1.28238	1.6461	1.55165	12.5928	0.000387244	0.017033	protein_coding
Krt7	ENSMUSG00000023039	0.368128	4.51885	3.61329	3.86022	12.5889	0.000388051	0.017033	protein_coding
Inppl1	ENSMUSG00000032737	24.0912	14.3188	-0.750092	7.01423	12.5701	0.000391968	0.0171544	protein_coding
3425401B19Rik	ENSMUSG00000071540	11.4861	6.36905	-0.848202	5.71398	12.4879	0.000409588	0.0178729	protein_coding
1810062G17Rik	ENSMUSG00000027713	0.669033	2.27844	1.78476	0.393615	12.4458	0.000418931	0.018219	protein_coding
Fam46a	ENSMUSG00000032265	2.45826	5.10232	1.05013	4.32941	12.4412	0.000419968	0.018219	protein_coding
Fam162a	ENSMUSG00000003955	189.699	353.615	0.898034	7.34116	12.4137	0.000426194	0.0183819	protein_coding
Kcnn4	ENSMUSG00000054342	0.131556	2.48946	4.23072	2.51935	12.3294	0.000445869	0.0190647	protein_coding
Sacs	ENSMUSG00000048279	1.35968	3.28624	1.27129	5.44275	12.2913	0.000455072	0.0194025	protein_coding
Retsat	ENSMUSG00000056666	23.1782	13.1078	-0.820612	6.08465	12.2787	0.000458169	0.0194401	protein_coding
Htra1	ENSMUSG00000006205	24.1459	14.2751	-0.757382	5.8648	12.277	0.000458567	0.0194401	protein_coding
Cenpn	ENSMUSG00000031756	2.5117	4.91297	0.966588	3.52553	12.2585	0.000463139	0.0195781	protein_coding
Antxr1	ENSMUSG00000033420	4.40339	2.55836	-0.782653	5.13249	12.2489	0.000465523	0.0196232	protein_coding
Ifit1	ENSMUSG00000034459	0.557789	1.52865	1.43905	1.37401	12.1944	0.000479344	0.0201487	protein_coding
Scube1	ENSMUSG00000016763	1.08481	0.481195	-1.16689	2.84224	12.1786	0.000483413	0.0202625	protein_coding
Iqgap3	ENSMUSG00000028068	2.26661	4.81968	1.08887	5.22879	12.1697	0.000485711	0.0202632	protein_coding
Slc40a1	ENSMUSG00000025993	2.14646	0.944353	-1.17969	3.91968	12.168	0.000486153	0.0202632	protein_coding
Ppp1r26	ENSMUSG00000035829	2.45549	1.2106	-1.01425	3.47585	12.0953	0.000505482	0.02101	protein_coding
Frmd4a	ENSMUSG00000026657	2.7879	1.62181	-0.78041	5.76352	11.9906	0.000534697	0.0221008	protein_coding
Pcx	ENSMUSG00000024892	3.34548	13.9595	2.06167	5.02739	11.9806	0.000537571	0.0221581	protein_coding
Cdca8	ENSMUSG00000028873	3.96193	7.51837	0.92536	4.80525	11.9702	0.000540568	0.0222086	protein_coding
Ankle1	ENSMUSG00000046295	0.895185	2.28444	1.33993	1.91883	11.9661	0.000541781	0.0222086	protein_coding
Cxcl12	ENSMUSG00000061353	16.2836	9.72999	-0.742317	6.80511	11.9417	0.000548913	0.0224391	protein_coding
Pycr1	ENSMUSG00000025140	1.18189	3.04586	1.37123	2.94684	11.9314	0.000551942	0.0224597	protein_coding
Gale	ENSMUSG00000028671	1.86146	5.67035	1.61262	3.02796	11.9298	0.000552435	0.0224597	protein_coding
Fbxo5	ENSMUSG00000019773	3.4803	6.8917	0.983494	3.29003	11.9205	0.000555186	0.022479	protein_coding
Nop56	ENSMUSG00000027405	7.45533	12.9281	0.792252	5.30751	11.918	0.000555933	0.022479	protein_coding
Tnrc6c	ENSMUSG00000025571	3.87507	2.23852	-0.789224	5.37462	11.9038	0.000560194	0.0225899	protein_coding
Zwint	ENSMUSG00000019923	22.8131	39.0912	0.776398	7.02346	11.8969	0.000562263	0.0226121	protein_coding
Tmem79	ENSMUSG00000001420	0.348216	1.4651	2.0834	1.30495	11.8826	0.000566601	0.022664	protein_coding
Ocln	ENSMUSG00000021638	0.454501	1.17333	1.37831	1.70192	11.8608	0.000573274	0.0228695	protein_coding
Tacc2	ENSMUSG00000030852	10.6254	6.08173	-0.80384	7.08584	11.8403	0.000579622	0.0230609	protein_coding
Sh3bp5	ENSMUSG00000021892	25.0331	15.1755	-0.722652	6.07629	11.8298	0.000582895	0.0231293	protein_coding
Tfcp2l1	ENSMUSG00000026380	0.131593	1.44945	3.45673	2.6879	11.8183	0.000586517	0.0232002	protein_coding
Cacna1c	ENSMUSG00000051331	9.51102	5.50662	-0.789073	7.38991	11.8068	0.000590162	0.0232002	protein_coding
Tcf19	ENSMUSG00000050410	12.923	25.1058	0.955229	4.98924	11.8066	0.000590207	0.0232002	protein_coding
Cdkn3	ENSMUSG00000037628	8.47346	24.0686	1.5057	3.51287	11.8044	0.000590919	0.0232002	protein_coding
Arxes1	ENSMUSG00000048355	2.34175	5.66066	1.28037	2.5623	11.7644	0.000603744	0.0236414	protein_coding
Tuba1b	ENSMUSG00000023004	169.69	335.762	0.984411	8.79042	11.7535	0.000607293	0.0237179	protein_coding
Fam122b	ENSMUSG00000036022	4.85536	9.06542	0.898005	4.85229	11.7176	0.000619127	0.0241168	protein_coding
Cenpm	ENSMUSG00000068101	8.27431	18.1351	1.13058	3.88013	11.6905	0.000628184	0.0244057	protein_coding
Eif4e3	ENSMUSG00000093661	9.86782	5.50054	-0.840387	4.36095	11.664	0.000637217	0.0246525	protein_coding
Ifi27l2a	ENSMUSG00000079017	19.7647	46.4142	1.23535	3.83068	11.6621	0.000637851	0.0246525	protein_coding
Trp53i11	ENSMUSG00000068735	21.6123	11.5698	-0.898739	6.02369	11.6369	0.00064657	0.0248116	protein_coding
Bdh1	ENSMUSG00000046598	0.697233	1.76324	1.33814	2.11663	11.6357	0.000646968	0.0248116	protein_coding
Wwc1	ENSMUSG00000018849	0.330895	1.34133	2.02284	1.93471	11.6248	0.000650769	0.0248932	protein_coding
Arhgap11a	ENSMUSG00000041219	3.51025	7.00736	0.995481	4.71278	11.6159	0.000653904	0.0249489	protein_coding
Hspe1	ENSMUSG00000073676	58.1022	100.188	0.785419	6.78823	11.6035	0.000658287	0.0250519	protein_coding
5330417C22Rik	ENSMUSG00000040412	0.0694066	1.72161	4.61623	2.27491	11.5686	0.00067075	0.0254611	protein_coding
AC149090.1	ENSMUSG00000095041	1.48499	2.87972	0.956396	3.12915	11.5554	0.000675536	0.0255776	protein_coding
Angptl4	ENSMUSG00000002289	49.2507	16.863	-1.54453	6.90003	11.5147	0.000690484	0.0260772	protein_coding
3632451O06Rik	ENSMUSG00000036242	4.53102	10.3094	1.18292	4.64849	11.51	0.000692236	0.0260772	protein_coding
Pbdc1	ENSMUSG00000031226	2.77141	5.32702	0.939499	4.53591	11.4807	0.000703227	0.0264243	protein_coding
Acacb	ENSMUSG00000042010	24.1241	12.2312	-0.978738	7.54447	11.4723	0.000706425	0.026466	protein_coding
Nipal2	ENSMUSG00000038879	0.56443	2.10641	1.90569	2.2306	11.4607	0.000710824	0.026466	protein_coding
Rdh11	ENSMUSG00000066441	2.99828	5.92041	0.977191	3.85319	11.4591	0.00071145	0.026466	protein_coding
Scmh1	ENSMUSG00000000085	9.97504	6.1062	-0.707515	6.02849	11.3935	0.000737003	0.0273482	protein_coding
Per3	ENSMUSG00000028957	2.32505	1.14433	-1.02239	4.1637	11.3871	0.000739555	0.0273746	protein_coding
Ncaph	ENSMUSG00000034906	4.4344	8.04937	0.860643	4.66722	11.3333	0.000761291	0.0280396	protein_coding
Gpd1	ENSMUSG00000023019	6.86005	115.871	4.0778	7.22575	11.3183	0.000767464	0.0281972	protein_coding
Prex1	ENSMUSG00000039621	2.29839	1.00382	-1.1863	4.20245	11.3027	0.000773956	0.0283657	protein_coding
Rxra	ENSMUSG00000015846	15.9382	8.95953	-0.828583	6.16874	11.2791	0.000783839	0.0286511	protein_coding
Cenph	ENSMUSG00000045273	1.98675	4.42806	1.15124	2.41976	11.275	0.000785594	0.0286511	protein_coding
Cdca5	ENSMUSG00000024791	2.34645	5.50454	1.23291	2.95767	11.2602	0.000791859	0.028809	protein_coding
Adipoq	ENSMUSG00000022878	0.166057	30.5086	7.47329	4.10902	11.2512	0.000795696	0.0288779	protein_coding
Apoc1	ENSMUSG00000040564	1.42654	7.99186	2.48547	1.68144	11.2455	0.000798156	0.0288968	protein_coding
Cdca2	ENSMUSG00000048922	1.63684	3.27994	1.00432	3.7221	11.2388	0.000801053	0.0289312	protein_coding
Pnpla7	ENSMUSG00000036833	3.72529	2.0272	-0.876761	4.52123	11.234	0.000803132	0.0289361	protein_coding
Blm	ENSMUSG00000030528	0.870789	1.76638	1.01378	3.43896	11.2266	0.000806311	0.0289805	protein_coding
Cpt2	ENSMUSG00000028607	69.957	39.5307	-0.822266	7.11168	11.2073	0.000814774	0.0291574	protein_coding
Slc27a1	ENSMUSG00000031808	22.837	11.3175	-1.01151	6.73493	11.2064	0.000815154	0.0291574	protein_coding
Mxd3	ENSMUSG00000021485	5.9753	11.0691	0.890564	4.06718	11.1964	0.000819552	0.0292428	protein_coding
Cnnm3	ENSMUSG00000001138	4.77626	2.48827	-0.934362	4.63918	11.1921	0.00082147	0.0292428	protein_coding
Ephx2	ENSMUSG00000022040	81.8074	45.6872	-0.840717	7.10018	11.1866	0.000823895	0.0292591	protein_coding
Eml2	ENSMUSG00000040811	23.8757	14.3098	-0.7376	6.14715	11.1742	0.000829437	0.029316	protein_coding
Lynx1	ENSMUSG00000022594	25.9749	15.4447	-0.750662	6.66629	11.1677	0.000832327	0.0293484	protein_coding
Cenpk	ENSMUSG00000021714	1.99529	4.90533	1.2858	2.54278	11.161	0.000835348	0.0293853	protein_coding
Epas1	ENSMUSG00000024140	23.0333	12.3539	-0.89693	6.64008	11.1538	0.00083862	0.0294308	protein_coding
Cep131	ENSMUSG00000039781	5.28545	2.80171	-0.908575	4.05173	11.1272	0.000850706	0.0297551	protein_coding
Pcp4l1	ENSMUSG00000038370	114.585	67.0281	-0.772548	7.2368	11.1203	0.000853859	0.0297551	protein_coding
Bex4	ENSMUSG00000047844	25.0822	42.2699	0.751436	4.7458	11.1141	0.000856718	0.029785	protein_coding
Pnp	ENSMUSG00000021871	5.71139	9.8378	0.782476	4.51074	11.1064	0.000860281	0.0298391	protein_coding
Bri3bp	ENSMUSG00000037905	12.2818	7.21511	-0.765908	6.07723	11.0565	0.000883745	0.0305817	protein_coding
Fgf12	ENSMUSG00000022523	2.06723	4.76002	1.20336	3.28608	11.0445	0.00088951	0.0307098	protein_coding
Gria3	ENSMUSG00000001986	0.486741	1.0321	1.07627	2.80962	11.0373	0.000892969	0.0307578	protein_coding
Dmkn	ENSMUSG00000060962	0.460239	1.51652	1.71329	1.03952	11.0227	0.00090004	0.0308641	protein_coding
Cidec	ENSMUSG00000030278	0.0963047	12.5922	6.96775	3.2787	11.0125	0.000904971	0.0308641	protein_coding
Spc24	ENSMUSG00000074476	5.66197	12.0133	1.08411	4.40259	11.0059	0.000908224	0.0308641	protein_coding
Smox	ENSMUSG00000027333	10.8905	6.11014	-0.829143	5.13326	11.0025	0.000909881	0.0308641	protein_coding
Gpsm1	ENSMUSG00000026930	40.3507	24.8367	-0.699871	7.52297	10.997	0.000912589	0.0308641	protein_coding
Rere	ENSMUSG00000039852	9.62315	5.5656	-0.788023	6.0944	10.9929	0.000914598	0.0308641	protein_coding
Lrrc61	ENSMUSG00000073096	5.20058	2.79429	-0.895214	3.63993	10.9925	0.000914801	0.0308641	protein_coding
Clasp1	ENSMUSG00000064302	17.5693	10.6652	-0.720083	8.33799	10.9881	0.000916979	0.0308641	protein_coding
Zfp979	ENSMUSG00000066000	5.61212	12.1532	1.11225	5.0818	10.985	0.000918531	0.0308641	protein_coding
BC034090	ENSMUSG00000033722	8.55453	5.22418	-0.710433	5.89496	10.9825	0.000919746	0.0308641	protein_coding
Traip	ENSMUSG00000032586	0.576869	1.31226	1.17771	2.46563	10.9819	0.000920078	0.0308641	protein_coding
Cdkn2c	ENSMUSG00000028551	10.6611	17.9235	0.75063	5.19112	10.978	0.000921987	0.0308641	protein_coding
Dnmt3a	ENSMUSG00000020661	7.47148	4.51798	-0.725666	6.71143	10.976	0.000923018	0.0308641	protein_coding
Aif1l	ENSMUSG00000001864	5.44297	11.0369	1.01874	4.95473	10.9524	0.000934818	0.0311886	protein_coding
Tmcc2	ENSMUSG00000042066	5.54065	3.09405	-0.837346	4.70535	10.9364	0.000942916	0.0313883	protein_coding
Cacna1g	ENSMUSG00000020866	6.10551	3.69141	-0.723908	5.70679	10.8898	0.000966928	0.0321158	protein_coding
Pparg	ENSMUSG00000000440	2.68504	5.98188	1.15962	3.58051	10.8749	0.000974739	0.0323032	protein_coding
Sipa1l2	ENSMUSG00000001995	11.811	7.17955	-0.718609	6.58317	10.8487	0.000988662	0.0326433	protein_coding
Neat1	ENSMUSG00000092274	0.536034	1.47472	1.45898	4.25203	10.8445	0.000990923	0.0326433	lincRNA
Haus3	ENSMUSG00000079555	1.83325	3.97367	1.10874	3.3879	10.8432	0.000991585	0.0326433	protein_coding
Zfp423	ENSMUSG00000045333	1.34882	0.612998	-1.12458	2.59379	10.8357	0.000995595	0.032703	protein_coding
Gm12191	ENSMUSG00000083061	47.7101	20.3113	-1.23396	3.69233	10.803	0.00101334	0.0331363	processed_pseudogene
Iqgap2	ENSMUSG00000021676	0.790216	1.75424	1.1537	2.78833	10.7813	0.00102531	0.0333842	protein_coding
Nav1	ENSMUSG00000009418	3.8916	2.37725	-0.709974	5.83229	10.7627	0.00103565	0.0336475	protein_coding
Vmp1	ENSMUSG00000018171	10.857	18.155	0.74009	5.73541	10.7339	0.00105191	0.0341011	protein_coding
Pxdn	ENSMUSG00000020674	27.5375	16.0211	-0.780983	7.77053	10.7248	0.00105709	0.0341944	protein_coding
Smad3	ENSMUSG00000032402	8.04251	4.72168	-0.766129	5.22227	10.7139	0.00106333	0.0343219	protein_coding
Apmap	ENSMUSG00000033096	9.11528	17.3001	0.926828	4.91693	10.6971	0.00107306	0.0345608	protein_coding
Polr3gl	ENSMUSG00000028104	22.5231	12.6198	-0.838087	4.89556	10.6615	0.00109388	0.034871	protein_coding
Slc16a3	ENSMUSG00000025161	2.5366	9.2304	1.86198	4.79089	10.6586	0.0010956	0.034871	protein_coding
Herc2	ENSMUSG00000030451	3.66909	2.19739	-0.739362	5.6422	10.657	0.00109655	0.034871	protein_coding
Rreb1	ENSMUSG00000039087	4.23507	2.38962	-0.824721	5.61598	10.6567	0.00109675	0.034871	protein_coding
Gadd45g	ENSMUSG00000021453	9.17998	16.5061	0.847297	3.83867	10.6377	0.00110803	0.0351547	protein_coding
Ubr2	ENSMUSG00000023977	12.5336	7.6793	-0.706392	6.3607	10.6305	0.00111236	0.0351682	protein_coding
Lmtk2	ENSMUSG00000038970	3.76139	2.07132	-0.858377	4.65287	10.6292	0.00111319	0.0351682	protein_coding
B2m	ENSMUSG00000060802	119.344	202.12	0.759424	7.03539	10.6187	0.00111953	0.0352935	protein_coding
Nkain1	ENSMUSG00000078532	6.03533	2.72508	-1.13019	2.77667	10.6115	0.00112387	0.0353557	protein_coding
Rpl6	ENSMUSG00000029614	156.007	264.449	0.76128	9.29035	10.5754	0.00114599	0.0359502	protein_coding
Rflnb	ENSMUSG00000020846	15.514	7.8257	-0.982595	5.45361	10.5729	0.0011476	0.0359502	protein_coding
Fam213a	ENSMUSG00000021792	6.7022	11.5709	0.789948	4.67879	10.5664	0.0011516	0.0359995	protein_coding
Diaph3	ENSMUSG00000022021	1.97024	3.78082	0.936347	3.63453	10.5297	0.00117472	0.0366318	protein_coding
Ube2s	ENSMUSG00000060860	19.6341	31.7059	0.691492	6.9756	10.5261	0.00117699	0.0366318	protein_coding
Oat	ENSMUSG00000030934	58.1221	105.719	0.862572	7.50896	10.5199	0.00118093	0.0366318	protein_coding
Ccdc34	ENSMUSG00000027160	2.06637	4.00738	0.951216	4.22444	10.5165	0.00118316	0.0366318	protein_coding
Cdkn2d	ENSMUSG00000096472	21.5163	39.9599	0.891614	5.50862	10.5149	0.00118413	0.0366318	protein_coding
Ttc38	ENSMUSG00000035944	4.02	1.98368	-1.02869	3.63586	10.4756	0.00120963	0.0373426	protein_coding
Spta1	ENSMUSG00000026532	0.604277	1.4261	1.23067	3.18111	10.4718	0.00121213	0.0373426	protein_coding
Rps26	ENSMUSG00000025362	882.468	1498.89	0.764161	8.97944	10.4511	0.00122576	0.0376116	protein_coding
Plk1	ENSMUSG00000030867	8.9326	18.0673	1.0187	4.79624	10.4509	0.00122592	0.0376116	protein_coding
Klf10	ENSMUSG00000037465	17.0663	9.05076	-0.911944	5.40421	10.4296	0.00124009	0.0379324	protein_coding
Tnfaip6	ENSMUSG00000053475	0.629736	1.61631	1.35711	0.891997	10.4233	0.00124436	0.0379428	protein_coding
Ulk1	ENSMUSG00000029512	14.26	8.36526	-0.767466	6.27341	10.4148	0.00125008	0.0380292	protein_coding
Selenoh	ENSMUSG00000076437	37.4311	66.4973	0.828515	5.79565	10.4115	0.00125231	0.0380292	protein_coding
Mif	ENSMUSG00000033307	252.131	469.688	0.897619	7.55431	10.3894	0.00126739	0.038409	protein_coding
Oip5	ENSMUSG00000072980	1.78666	4.32426	1.27224	2.33207	10.3791	0.00127452	0.0384683	protein_coding
Txn1	ENSMUSG00000028367	96.6946	163.405	0.756411	7.01946	10.3736	0.00127833	0.0385051	protein_coding
Hspg2	ENSMUSG00000028763	47.6945	24.9672	-0.933521	9.10964	10.3577	0.00128938	0.0387596	protein_coding
Zfp985	ENSMUSG00000065999	0.609463	1.42526	1.215	1.46947	10.3514	0.00129375	0.0388124	protein_coding
Upk1b	ENSMUSG00000049436	1.66028	5.10974	1.61419	2.45111	10.3464	0.00129726	0.0388395	protein_coding
Eps8l1	ENSMUSG00000006154	1.12594	0.502459	-1.14885	2.43964	10.3246	0.0013127	0.0392087	protein_coding
Grap2	ENSMUSG00000042351	1.06267	0.16299	-2.75204	1.23646	10.32	0.00131596	0.0392087	protein_coding
Cx3cr1	ENSMUSG00000052336	1.80851	0.701956	-1.33847	2.65302	10.3177	0.00131764	0.0392087	protein_coding
Mycbp	ENSMUSG00000028647	5.09601	8.7964	0.784938	4.27586	10.308	0.00132453	0.0392087	protein_coding
Stxbp2	ENSMUSG00000004626	2.81266	5.52805	0.977723	4.03012	10.3063	0.00132576	0.0392087	protein_coding
Dynll2	ENSMUSG00000020483	85.102	50.5802	-0.750666	7.60858	10.3031	0.00132804	0.0392087	protein_coding
Smtnl2	ENSMUSG00000045667	25.8207	15.6158	-0.724087	6.37604	10.2942	0.00133452	0.0393221	protein_coding
Mt3	ENSMUSG00000031760	10.4519	19.9208	0.933497	3.93303	10.277	0.00134696	0.0395462	protein_coding
Calm2	ENSMUSG00000036438	125.259	203.756	0.701641	7.84483	10.2638	0.00135668	0.0397391	protein_coding
Hbb-bs	ENSMUSG00000052305	715.035	1417.93	0.987575	9.57956	10.2327	0.00137976	0.0403356	protein_coding
Zfp932	ENSMUSG00000066613	0.868653	1.95939	1.16359	2.12114	10.2214	0.00138823	0.0405037	protein_coding
Gm45221	ENSMUSG00000109005	0.127614	1.44677	3.46144	0.536401	10.1997	0.00140464	0.0407854	TEC
Tmem209	ENSMUSG00000029782	1.72604	3.09101	0.836866	4.48905	10.1977	0.00140613	0.0407854	protein_coding
Myo18b	ENSMUSG00000072720	28.2774	17.2405	-0.713536	7.99668	10.1921	0.00141043	0.0407854	protein_coding
Pnpt1	ENSMUSG00000020464	7.42984	13.7353	0.883553	5.13091	10.1906	0.00141159	0.0407854	protein_coding
Xist	ENSMUSG00000086503	1.85575	11.0923	2.57893	6.63519	10.184	0.00141665	0.0408523	lincRNA
Rbm20	ENSMUSG00000043639	41.5155	25.317	-0.713782	7.89486	10.1617	0.00143392	0.0412702	protein_coding
Epb41l4a	ENSMUSG00000024376	3.92156	2.12702	-0.884434	3.63971	10.1387	0.00145186	0.0417059	protein_coding
Abra	ENSMUSG00000042895	6.32932	14.2798	1.16911	4.06833	10.135	0.00145479	0.0417097	protein_coding
Cdkn1a	ENSMUSG00000023067	12.8986	21.9819	0.767489	5.20286	10.1139	0.00147159	0.0421101	protein_coding
Notch3	ENSMUSG00000038146	7.2482	3.62781	-0.994556	5.54822	10.0909	0.00149006	0.0425568	protein_coding
Elp2	ENSMUSG00000024271	13.1958	21.9905	0.73519	5.54503	10.0577	0.00151709	0.0431976	protein_coding
Zwilch	ENSMUSG00000032400	1.58474	3.18987	1.00441	3.2619	10.0563	0.0015183	0.0431976	protein_coding
Elmod3	ENSMUSG00000056698	9.81824	5.31846	-0.881289	4.84215	10.0412	0.00153081	0.0434703	protein_coding
Slc12a4	ENSMUSG00000017765	15.0389	9.37025	-0.68161	5.77522	10.0221	0.00154673	0.0437925	protein_coding
Itpkb	ENSMUSG00000038855	8.98951	5.23211	-0.779266	6.29381	10.0205	0.00154804	0.0437925	protein_coding
Zc3h7a	ENSMUSG00000037965	2.18139	4.1807	0.935267	4.7746	10.0009	0.00156466	0.0441786	protein_coding
Pglyrp1	ENSMUSG00000030413	0.484883	8.96221	4.19871	2.88096	9.97963	0.00158281	0.0446065	protein_coding
Gap43	ENSMUSG00000047261	3.23082	6.5575	1.02765	2.81953	9.97162	0.00158971	0.0447112	protein_coding
Rps28	ENSMUSG00000067288	127.239	204.738	0.685948	7.85635	9.96836	0.00159253	0.0447112	protein_coding
Col9a2	ENSMUSG00000028626	3.4369	1.53495	-1.14349	3.0746	9.95299	0.00160589	0.0449345	protein_coding
Cdc20	ENSMUSG00000006398	19.1202	37.5067	0.973824	5.63157	9.95225	0.00160653	0.0449345	protein_coding
Pde3b	ENSMUSG00000030671	1.70695	2.84091	0.735347	4.30639	9.92617	0.00162945	0.0453662	protein_coding
Mmp15	ENSMUSG00000031790	53.954	31.1386	-0.792329	7.91925	9.91508	0.0016393	0.0455064	protein_coding
Rnf144a	ENSMUSG00000020642	6.68835	3.56316	-0.904173	4.81794	9.90731	0.00164624	0.0455064	protein_coding
Slirp	ENSMUSG00000021040	9.85638	16.8309	0.770135	5.29724	9.9071	0.00164642	0.0455064	protein_coding
Klhl13	ENSMUSG00000036782	11.627	22.597	0.957233	6.09048	9.90491	0.00164839	0.0455064	protein_coding
Atad2	ENSMUSG00000022360	2.4595	5.19132	1.07353	4.33724	9.88956	0.00166219	0.0458027	protein_coding
Ckap5	ENSMUSG00000040549	8.49402	15.1601	0.834815	6.72313	9.8838	0.0016674	0.0458612	protein_coding
Lrrc40	ENSMUSG00000063052	4.98025	8.94293	0.842043	4.97159	9.84544	0.00170253	0.046741	protein_coding
Sox10	ENSMUSG00000033006	0.257994	2.46722	3.24809	1.72752	9.81484	0.0017311	0.0474343	protein_coding
Apex1	ENSMUSG00000035960	29.58	47.6421	0.686215	5.71188	9.81159	0.00173416	0.0474343	protein_coding
Tk1	ENSMUSG00000025574	5.3264	9.61907	0.852101	5.19676	9.80125	0.00174393	0.0476142	protein_coding
Sowahc	ENSMUSG00000098188	0.446823	1.08946	1.2926	1.71399	9.79396	0.00175086	0.0477158	protein_coding
Zmiz1	ENSMUSG00000007817	8.90578	5.30903	-0.745366	6.54891	9.78691	0.00175759	0.0478115	protein_coding
Tmem8b	ENSMUSG00000078716	4.94984	2.74278	-0.847121	4.50513	9.78251	0.00176179	0.0478385	protein_coding
Adcy6	ENSMUSG00000022994	39.9499	24.6973	-0.693483	7.67097	9.77774	0.00176637	0.0478753	protein_coding
Dbp	ENSMUSG00000059824	13.4892	6.2352	-1.10966	4.99134	9.77352	0.00177043	0.0478832	protein_coding
Cd9	ENSMUSG00000030342	17.8875	29.4326	0.720218	5.5272	9.77076	0.00177309	0.0478832	protein_coding
Mef2d	ENSMUSG00000001419	33.413	20.4579	-0.707079	7.40161	9.75797	0.00178547	0.048081	protein_coding
Vcan	ENSMUSG00000021614	6.42618	12.7782	0.990854	7.01913	9.75652	0.00178688	0.048081	protein_coding
Mns1	ENSMUSG00000032221	0.842953	1.92038	1.1794	2.77979	9.73462	0.00180829	0.0485048	protein_coding
Zfp946	ENSMUSG00000071266	1.63058	3.64671	1.15371	3.10477	9.73128	0.00181158	0.0485048	protein_coding
Arfgap3	ENSMUSG00000054277	14.003	23.5506	0.751087	5.54691	9.73044	0.00181241	0.0485048	protein_coding
Kcnj11	ENSMUSG00000096146	27.7625	15.6124	-0.828049	6.39834	9.7187	0.00182402	0.0487279	protein_coding
Rnf114	ENSMUSG00000006418	25.6232	16.3115	-0.652359	6.20173	9.68757	0.00185519	0.0491597	protein_coding
Rnd3	ENSMUSG00000017144	5.90459	10.0425	0.763424	5.06908	9.68365	0.00185915	0.0491597	protein_coding
Rpsa	ENSMUSG00000032518	342.549	590.879	0.786516	10.4521	9.68326	0.00185955	0.0491597	protein_coding
Cdkn1c	ENSMUSG00000037664	53.1782	93.0274	0.807463	7.14013	9.68284	0.00185997	0.0491597	protein_coding
Ptgr1	ENSMUSG00000028378	3.73855	8.22032	1.13403	3.67113	9.68226	0.00186056	0.0491597	protein_coding
Mtfr2	ENSMUSG00000019992	1.06699	2.81883	1.4009	1.94457	9.68209	0.00186073	0.0491597	protein_coding
Fanci	ENSMUSG00000039187	0.901271	2.286	1.33863	3.07427	9.67167	0.00187131	0.0492834	protein_coding
Mcm10	ENSMUSG00000026669	0.743305	1.45849	0.96737	2.9968	9.66279	0.00188037	0.0494346	protein_coding
Nop58	ENSMUSG00000026020	3.80615	6.69663	0.813299	5.74014	9.65077	0.00189272	0.0496713	protein_coding
Speg	ENSMUSG00000026207	11.1383	7.03464	-0.662389	6.92032	9.63798	0.00190595	0.0499306	protein_coding
Pmp22	ENSMUSG00000018217	22.4716	37.7596	0.74729	6.0737	9.62792	0.00191641	0.0500266	protein_coding
Prrc2b	ENSMUSG00000039262	17.7626	10.3699	-0.775601	7.38256	9.62754	0.00191681	0.0500266	protein_coding
Jup	ENSMUSG00000001552	53.5241	29.8238	-0.843025	8.14774	9.62254	0.00192203	0.0500266	protein_coding
Hectd4	ENSMUSG00000042744	2.5415	1.52401	-0.735458	5.13832	9.62156	0.00192307	0.0500266	protein_coding
Megf8	ENSMUSG00000045039	5.22182	2.82428	-0.882526	5.44092	9.6105	0.00193468	0.0502409	protein_coding
Sema4d	ENSMUSG00000021451	4.07147	2.40923	-0.756081	4.4654	9.59321	0.00195299	0.0505855	protein_coding
Ssr2	ENSMUSG00000041355	56.0157	88.2135	0.655325	7.00586	9.59155	0.00195475	0.0505855	protein_coding
Col12a1	ENSMUSG00000032332	0.826721	1.49697	0.860411	4.069	9.57603	0.00197135	0.0509264	protein_coding
Rpl31-ps12	ENSMUSG00000083192	2.27755	0.368226	-2.56629	-0.574824	9.57276	0.00197486	0.0509288	processed_pseudogene
Nudt19	ENSMUSG00000034875	25.4371	40.9217	0.685133	6.40678	9.5511	0.0019983	0.0512617	protein_coding
Nfic	ENSMUSG00000055053	22.3753	11.7487	-0.927942	6.88947	9.54811	0.00200155	0.0512617	protein_coding
Akr1b10	ENSMUSG00000061758	13.8171	23.6897	0.776094	5.97414	9.54191	0.00200833	0.0513145	protein_coding
Ahcy	ENSMUSG00000027597	11.9441	19.6238	0.714343	5.39893	9.53513	0.00201576	0.0513177	protein_coding
Dsn1	ENSMUSG00000027635	3.17366	6.68147	1.07029	3.94328	9.53352	0.00201753	0.0513177	protein_coding
Tyms	ENSMUSG00000025747	2.42241	4.48419	0.885627	4.30951	9.52426	0.00202773	0.0513683	protein_coding
Colec11	ENSMUSG00000036655	20.8066	10.393	-1.0089	4.53118	9.52134	0.00203096	0.0513683	protein_coding
Aldh3b2	ENSMUSG00000075296	0.239664	1.42439	2.56713	0.769583	9.51935	0.00203317	0.0513683	protein_coding
Crat	ENSMUSG00000026853	125.547	76.7384	-0.710083	9.1583	9.5192	0.00203333	0.0513683	protein_coding
Eloc	ENSMUSG00000079658	23.2746	38.0257	0.707148	6.46519	9.50939	0.00204423	0.0515354	protein_coding
Myl6	ENSMUSG00000090841	484.961	794.717	0.712434	8.66166	9.50702	0.00204687	0.0515354	protein_coding
Prelid1	ENSMUSG00000021486	115.188	184.412	0.678764	7.28105	9.49092	0.00206491	0.0518144	protein_coding
Cep72	ENSMUSG00000021572	1.50324	3.02377	1.00595	2.95205	9.47039	0.00208815	0.0523092	protein_coding
Psip1	ENSMUSG00000028484	10.2962	17.6388	0.775056	6.07286	9.46175	0.00209801	0.052381	protein_coding
Anxa8	ENSMUSG00000021950	0.507937	1.71976	1.75444	1.00072	9.46171	0.00209806	0.052381	protein_coding
Creb3l4	ENSMUSG00000027938	0.518065	2.93635	2.50023	1.42453	9.45318	0.00210783	0.0524371	protein_coding
Pttg1	ENSMUSG00000020415	18.019	34.3036	0.927922	5.6186	9.45156	0.0021097	0.0524371	protein_coding
Rpl36al	ENSMUSG00000049751	51.276	84.5619	0.720947	6.45075	9.45054	0.00211087	0.0524371	protein_coding
Tmem97	ENSMUSG00000037278	12.3767	23.7205	0.937035	4.54275	9.44636	0.00211569	0.052469	protein_coding
Nudt5	ENSMUSG00000025817	3.6209	6.38586	0.815839	4.94042	9.43576	0.00212795	0.0526272	protein_coding
Hsdl2	ENSMUSG00000028383	129.961	80.432	-0.692468	8.26671	9.43474	0.00212914	0.0526272	protein_coding
Cdc7	ENSMUSG00000029283	1.17878	2.50238	1.07727	2.84667	9.43136	0.00213306	0.0526366	protein_coding
Rpl10	ENSMUSG00000008682	257.485	433.871	0.752676	9.39563	9.41558	0.00215149	0.0528655	protein_coding
Gm11353	ENSMUSG00000060198	1.32248	0.276726	-2.25442	-0.575912	9.41508	0.00215208	0.0528655	processed_pseudogene
Bcl9	ENSMUSG00000038256	5.47756	3.28415	-0.735628	5.28467	9.41329	0.00215418	0.0528655	protein_coding
Msmo1	ENSMUSG00000031604	3.38597	5.89559	0.797707	4.75653	9.40977	0.00215832	0.0528655	protein_coding
Tuba1a	ENSMUSG00000072235	183.848	322.7	0.811524	8.62327	9.40821	0.00216016	0.0528655	protein_coding
Thrsp	ENSMUSG00000035686	1.34963	13.2733	3.29644	3.7685	9.40291	0.00216641	0.0528655	protein_coding
Cpa3	ENSMUSG00000001865	7.87539	16.7351	1.08873	4.1258	9.40224	0.0021672	0.0528655	protein_coding
Mpped2	ENSMUSG00000016386	9.34199	5.66314	-0.721257	4.75908	9.39682	0.00217362	0.0528805	protein_coding
Hprt	ENSMUSG00000025630	60.2778	99.1858	0.717678	6.61215	9.39217	0.00217914	0.0528805	protein_coding
Arid1b	ENSMUSG00000069729	4.86354	2.9848	-0.702285	5.69868	9.38571	0.00218683	0.0528805	protein_coding
Obsl1	ENSMUSG00000026211	27.6282	16.9889	-0.700931	7.62955	9.38491	0.00218779	0.0528805	protein_coding
Slmap	ENSMUSG00000021870	21.7958	42.0371	0.947188	7.9116	9.38421	0.00218863	0.0528805	protein_coding
Malt1	ENSMUSG00000032688	1.94507	5.63564	1.53079	4.11657	9.38378	0.00218914	0.0528805	protein_coding
Cpt1a	ENSMUSG00000024900	31.0952	17.3354	-0.841259	6.78379	9.36864	0.00220729	0.0531721	protein_coding
Akr1b8	ENSMUSG00000029762	3.54704	6.73422	0.922446	2.8692	9.36776	0.00220836	0.0531721	protein_coding
Emb	ENSMUSG00000021728	1.17045	2.46026	1.07742	1.96646	9.35532	0.00222339	0.0534475	protein_coding
Nap1l5	ENSMUSG00000055430	0.398998	1.36082	1.73793	0.604708	9.34569	0.0022351	0.0536424	protein_coding
Tcp1	ENSMUSG00000068039	48.9697	82.0038	0.743543	8.28931	9.32134	0.00226501	0.0541298	protein_coding
Mfhas1	ENSMUSG00000070056	9.96301	6.38299	-0.641629	5.83252	9.31159	0.00227709	0.0542565	protein_coding
Cldn5	ENSMUSG00000041378	55.5276	34.1537	-0.698914	6.05655	9.31012	0.00227892	0.0542565	protein_coding
Prdx1	ENSMUSG00000028691	98.4465	162.117	0.719446	8.55897	9.30572	0.00228439	0.0542999	protein_coding
Bora	ENSMUSG00000022070	2.85478	5.36063	0.908818	3.37753	9.29995	0.00229159	0.0543407	protein_coding
Ostc	ENSMUSG00000041084	20.6219	33.3471	0.692717	6.1461	9.2985	0.00229341	0.0543407	protein_coding
Mir22hg	ENSMUSG00000085148	4.20018	7.71991	0.875497	3.44305	9.29293	0.00230039	0.0544195	processed_transcript
Hs6st1	ENSMUSG00000045216	10.4752	5.97017	-0.807375	5.59092	9.2866	0.00230836	0.0545015	protein_coding
Btg3	ENSMUSG00000022863	9.54336	16.0476	0.747239	4.13419	9.28436	0.00231119	0.0545015	protein_coding
Satb1	ENSMUSG00000023927	1.71068	0.983837	-0.799281	4.76219	9.26332	0.00233789	0.0548944	protein_coding
Nasp	ENSMUSG00000028693	8.33643	15.4693	0.89061	6.39515	9.26252	0.00233891	0.0548944	protein_coding
Apela	ENSMUSG00000079042	0.28012	1.13774	1.98548	-0.431057	9.25403	0.00234978	0.0549856	protein_coding
Cenpp	ENSMUSG00000021391	7.4136	15.5967	1.06776	3.56177	9.25371	0.00235019	0.0549856	protein_coding
Gadd45a	ENSMUSG00000036390	4.24076	2.09675	-1.01075	2.60567	9.23353	0.00237624	0.0554175	protein_coding
Pcca	ENSMUSG00000041650	5.5667	9.06997	0.703967	5.18547	9.23076	0.00237982	0.0554175	protein_coding
Tgfbrap1	ENSMUSG00000070939	2.77059	1.65039	-0.743713	4.6784	9.22486	0.00238751	0.0554442	protein_coding
Cygb	ENSMUSG00000020810	26.1139	14.7153	-0.823553	5.65485	9.22326	0.00238959	0.0554442	protein_coding
Ypel3	ENSMUSG00000042675	48.1926	29.4399	-0.710316	6.23513	9.22131	0.00239215	0.0554442	protein_coding
Cep295	ENSMUSG00000046111	0.978022	1.85205	0.916832	4.43314	9.21576	0.0023994	0.0555258	protein_coding
Cenpq	ENSMUSG00000023919	3.60965	7.33572	1.01783	3.73529	9.20927	0.00240793	0.0556366	protein_coding
Klc3	ENSMUSG00000040714	0.268518	1.78361	2.72425	1.32916	9.20638	0.00241174	0.0556382	protein_coding
Mmp2	ENSMUSG00000031740	54.649	32.3442	-0.755644	7.26945	9.19497	0.0024268	0.0558136	protein_coding
Kcnq1	ENSMUSG00000009545	22.609	14.3632	-0.654338	6.30666	9.19495	0.00242684	0.0558136	protein_coding
Bahcc1	ENSMUSG00000039741	2.94478	1.59921	-0.87474	4.74889	9.18673	0.00243776	0.0558688	protein_coding
Dync1h1	ENSMUSG00000018707	17.2995	10.4251	-0.729994	7.83258	9.1838	0.00244167	0.0558688	protein_coding
Insl6	ENSMUSG00000050957	0.823791	2.48741	1.55758	0.172271	9.18147	0.00244477	0.0558688	protein_coding
Gtf2i	ENSMUSG00000060261	31.69	20.253	-0.645676	8.11203	9.17879	0.00244835	0.0558688	protein_coding
Ntn1	ENSMUSG00000020902	40.6089	24.7627	-0.71303	7.74984	9.17599	0.00245211	0.0558688	protein_coding
Morf4l2	ENSMUSG00000031422	48.0572	78.1243	0.700547	7.55789	9.17534	0.00245298	0.0558688	protein_coding
Spata33	ENSMUSG00000048478	2.74925	1.51043	-0.864589	3.29537	9.17344	0.00245552	0.0558688	protein_coding
Fam45a	ENSMUSG00000024993	1.68078	2.9649	0.816229	3.78537	9.15977	0.00247394	0.0560307	protein_coding
Jpt1	ENSMUSG00000020737	91.6704	148.943	0.700072	7.9443	9.15334	0.00248265	0.0561425	protein_coding
Togaram1	ENSMUSG00000035614	4.88856	2.64059	-0.887398	4.6894	9.14352	0.00249601	0.056359	protein_coding
Gm6472	ENSMUSG00000095597	17.4667	5.9591	-1.54951	3.08303	9.12592	0.00252013	0.0568175	transcribed_processed_pseudogene
Pcdhgc3	ENSMUSG00000102918	6.90249	3.99274	-0.791024	4.98475	9.12142	0.00252634	0.0568679	protein_coding
Eif4a1	ENSMUSG00000059796	105.455	167.672	0.668952	9.14207	9.11857	0.00253028	0.0568679	protein_coding
Mir24-1	ENSMUSG00000105904	2.5679	10.9185	2.01576	-1.04597	9.11379	0.0025369	0.0568679	miRNA
Sass6	ENSMUSG00000027959	0.744968	1.41296	0.920811	2.6505	9.11325	0.00253765	0.0568679	protein_coding
Nhsl1	ENSMUSG00000039835	6.39784	3.8436	-0.733066	5.93392	9.09377	0.00256482	0.057304	protein_coding
Gm28555	ENSMUSG00000101597	1.78508	0.236084	-2.92802	-0.251901	9.09027	0.00256973	0.0573278	processed_pseudogene
Eepd1	ENSMUSG00000036611	11.0529	6.71007	-0.720385	4.77928	9.08448	0.00257787	0.0574232	protein_coding
Troap	ENSMUSG00000032783	2.83008	6.10565	1.11543	3.24599	9.07473	0.00259166	0.057644	protein_coding
Ubr4	ENSMUSG00000066036	7.99556	4.81013	-0.731919	6.91996	9.06108	0.00261107	0.0579892	protein_coding
Scn5a	ENSMUSG00000032511	23.1046	12.4635	-0.889273	7.36914	9.04813	0.00262963	0.0582089	protein_coding
Rfc4	ENSMUSG00000022881	9.33052	18.2748	0.966184	4.31089	9.04725	0.0026309	0.0582089	protein_coding
Tpi1	ENSMUSG00000023456	324.822	600.051	0.885371	10.2256	9.046	0.0026327	0.0582089	protein_coding
Bckdhb	ENSMUSG00000032263	15.7631	26.581	0.75541	5.18438	9.02769	0.00265921	0.0587077	protein_coding
Ssr4	ENSMUSG00000002014	21.2142	33.436	0.656744	6.33843	9.0147	0.00267817	0.0590387	protein_coding
Nfix	ENSMUSG00000001911	16.9332	9.23117	-0.873272	6.67199	9.0118	0.00268243	0.0590452	protein_coding
Tcp11l2	ENSMUSG00000020034	25.3145	15.3876	-0.720003	6.19951	8.99621	0.00270541	0.059463	protein_coding
Plxnb1	ENSMUSG00000053646	5.873	3.70636	-0.664678	5.58921	8.96344	0.00275436	0.0603606	protein_coding
Krt14	ENSMUSG00000045545	0.389751	6.64729	4.07735	2.41227	8.95594	0.00276569	0.0605198	protein_coding
Calcoco1	ENSMUSG00000023055	64.0734	39.6681	-0.691679	7.75062	8.93672	0.00279493	0.0610098	protein_coding
Rhobtb2	ENSMUSG00000022075	7.83904	4.7044	-0.732935	5.10742	8.93462	0.00279816	0.0610098	protein_coding
Ogn	ENSMUSG00000021390	29.9226	50.4934	0.753722	6.59937	8.93317	0.00280038	0.0610098	protein_coding
Rps6	ENSMUSG00000028495	209.179	332.736	0.669473	8.68026	8.92633	0.00281089	0.0611492	protein_coding
Arhgdib	ENSMUSG00000030220	17.964	28.702	0.674137	5.2506	8.90702	0.00284077	0.061709	protein_coding
2810408I11Rik	ENSMUSG00000087213	0.307327	1.01507	1.68881	0.514176	8.88779	0.00287084	0.0622712	processed_transcript
Pycard	ENSMUSG00000030793	4.73523	7.96768	0.749132	4.52238	8.87776	0.00288665	0.0625231	protein_coding
Trp53inp2	ENSMUSG00000038375	142.621	85.7645	-0.733526	9.29995	8.87362	0.00289321	0.062548	protein_coding
Galt	ENSMUSG00000036073	20.8925	11.9801	-0.798003	5.4247	8.8694	0.0028999	0.062548	protein_coding
Nudcd1	ENSMUSG00000038736	2.89317	5.60085	0.947645	3.78141	8.86506	0.0029068	0.062548	protein_coding
Sh3bgrl	ENSMUSG00000031246	24.3992	39.5265	0.695049	6.65103	8.86226	0.00291127	0.062548	protein_coding
Ppia	ENSMUSG00000071866	174.695	300.854	0.784122	9.62555	8.86154	0.00291242	0.062548	protein_coding
Klhl30	ENSMUSG00000026308	39.6585	25.0403	-0.662521	6.70822	8.86116	0.00291302	0.062548	protein_coding
Mrps22	ENSMUSG00000032459	7.18221	12.5054	0.798051	5.21784	8.84892	0.00293263	0.0628782	protein_coding
Hdac11	ENSMUSG00000034245	10.5354	6.55625	-0.681938	5.11067	8.84567	0.00293785	0.0628995	protein_coding
Cse1l	ENSMUSG00000002718	14.3822	25.9603	0.850949	6.64819	8.83012	0.00296298	0.0633465	protein_coding
Zhx2	ENSMUSG00000071757	7.72663	4.51113	-0.771177	4.84264	8.82432	0.00297241	0.063457	protein_coding
Pdss1	ENSMUSG00000026784	3.9356	6.85846	0.798261	4.44272	8.81563	0.0029866	0.0635379	protein_coding
Trak1	ENSMUSG00000032536	22.7231	13.6539	-0.734473	7.90754	8.81492	0.00298778	0.0635379	protein_coding
Tacc3	ENSMUSG00000037313	6.84575	11.8603	0.794643	4.97895	8.81416	0.00298902	0.0635379	protein_coding
Kntc1	ENSMUSG00000029414	1.25538	2.74757	1.12546	3.88797	8.80891	0.00299763	0.0636302	protein_coding
Tmem86a	ENSMUSG00000010307	17.6267	10.3468	-0.763003	4.80215	8.80553	0.00300319	0.0636466	protein_coding
Irf2bpl	ENSMUSG00000034168	24.4383	15.0937	-0.69338	6.4136	8.80324	0.00300696	0.0636466	protein_coding
Cisd3	ENSMUSG00000078695	42.0365	69.1472	0.717055	5.46335	8.79951	0.00301311	0.0636863	protein_coding
Slc25a20	ENSMUSG00000032602	37.4515	21.743	-0.783194	7.23951	8.78798	0.00303222	0.0638962	protein_coding
Thbs4	ENSMUSG00000021702	6.21034	9.96097	0.681712	4.67016	8.78489	0.00303735	0.0638962	protein_coding
Pdpn	ENSMUSG00000028583	3.99577	7.89529	0.981954	3.35089	8.7828	0.00304084	0.0638962	protein_coding
Rrm2	ENSMUSG00000020649	19.3335	34.3101	0.827989	6.13449	8.7806	0.00304452	0.0638962	protein_coding
Mmp11	ENSMUSG00000000901	8.034	4.65851	-0.780158	4.1144	8.77115	0.00306032	0.0640473	protein_coding
Ell2	ENSMUSG00000001542	1.40186	2.82288	1.01261	2.86862	8.76727	0.00306684	0.0640934	protein_coding
Pgap3	ENSMUSG00000038208	10.6907	6.49355	-0.715433	4.8778	8.76076	0.00307781	0.0642325	protein_coding
Pde4a	ENSMUSG00000032177	3.94002	2.28941	-0.777305	4.65748	8.74651	0.00310195	0.0644218	protein_coding
mt-Nd2	ENSMUSG00000064345	6669.82	15424.5	1.2095	13.3661	8.74603	0.00310277	0.0644218	protein_coding
Bmf	ENSMUSG00000040093	5.61277	3.03253	-0.883356	4.59712	8.74597	0.00310287	0.0644218	protein_coding
Ltbp4	ENSMUSG00000040488	54.0152	27.7464	-0.960344	8.13613	8.74519	0.00310419	0.0644218	protein_coding
Nav2	ENSMUSG00000052512	2.73336	1.72588	-0.662293	6.23316	8.73102	0.00312841	0.0647438	protein_coding
Gm6712	ENSMUSG00000072761	2.06249	5.21029	1.31549	1.02436	8.72643	0.00313631	0.064817	lincRNA
Stat5b	ENSMUSG00000020919	11.1135	7.02857	-0.660977	5.71764	8.71244	0.00316046	0.0652256	protein_coding
Dbi	ENSMUSG00000026385	120.656	195.922	0.699373	7.74473	8.70445	0.00317434	0.0654212	protein_coding
Rpl23a	ENSMUSG00000058546	591.697	1005.24	0.764474	9.32495	8.6818	0.00321403	0.066077	protein_coding
Zbtb16	ENSMUSG00000066687	1.55288	3.24838	1.05837	3.56544	8.68091	0.00321561	0.066077	protein_coding
Folr2	ENSMUSG00000032725	0.427011	1.42117	1.73362	0.48948	8.67872	0.00321948	0.066077	protein_coding
Kif26a	ENSMUSG00000021294	7.93298	3.97491	-0.992467	5.46169	8.6727	0.00323013	0.0662043	protein_coding
Sspn	ENSMUSG00000030255	41.7855	26.6729	-0.648149	7.48113	8.6656	0.00324273	0.0663711	protein_coding
Myef2	ENSMUSG00000027201	3.73495	6.12034	0.709618	4.80254	8.64748	0.00327514	0.0669424	protein_coding
Cebpa	ENSMUSG00000034957	1.74561	12.1635	2.79968	3.98302	8.62623	0.00331356	0.0673577	protein_coding
Gm13453	ENSMUSG00000083240	6.28337	2.05338	-1.66226	0.800091	8.61324	0.00333728	0.0676548	processed_pseudogene
Tgm2	ENSMUSG00000037820	67.5064	108.324	0.68223	8.59389	8.60668	0.00334933	0.0678069	protein_coding
Foxk1	ENSMUSG00000056493	4.34684	2.49757	-0.797363	4.78013	8.59838	0.00336462	0.0679176	protein_coding
Tns1	ENSMUSG00000055322	37.7772	23.6401	-0.676129	9.00675	8.59587	0.00336927	0.0679176	protein_coding
Vill	ENSMUSG00000038775	0.985333	1.8706	0.920128	2.58267	8.59434	0.00337209	0.0679176	protein_coding
Prdm11	ENSMUSG00000075028	2.21967	1.30799	-0.759096	4.98852	8.59382	0.00337306	0.0679176	protein_coding
Vash1	ENSMUSG00000021256	9.99669	4.88765	-1.03321	4.37677	8.59126	0.0033778	0.0679212	protein_coding
Col26a1	ENSMUSG00000004415	3.07324	1.72607	-0.825045	4.38261	8.58674	0.00338621	0.0679983	protein_coding
Gstm2	ENSMUSG00000040562	27.2356	43.2878	0.667437	5.82221	8.5795	0.00339969	0.068177	protein_coding
Gal3st3	ENSMUSG00000047658	4.05177	2.14381	-0.909095	3.01639	8.56835	0.00342057	0.0684114	protein_coding
Fabp5	ENSMUSG00000027533	45.0595	73.8661	0.712602	7.65742	8.55766	0.0034407	0.0687217	protein_coding
Tubb4b	ENSMUSG00000036752	71.0085	119.081	0.745953	7.55842	8.5552	0.00344536	0.0687225	protein_coding
Agpat2	ENSMUSG00000026922	10.4566	24.8398	1.24972	5.11664	8.54815	0.00345874	0.0688971	protein_coding
Smpd3	ENSMUSG00000031906	0.701604	1.3626	0.960271	2.36794	8.54558	0.00346362	0.068902	protein_coding
Tmem183a	ENSMUSG00000042305	9.08616	14.3006	0.652728	5.31808	8.52233	0.00350814	0.0695089	protein_coding
Rnf4	ENSMUSG00000029110	10.8088	16.3876	0.599879	6.57149	8.50845	0.00353501	0.0699445	protein_coding
Gm43300	ENSMUSG00000105572	0.212256	1.37541	2.65459	0.46152	8.50612	0.00353953	0.0699445	TEC
Tmtc1	ENSMUSG00000030306	6.55929	3.62887	-0.853881	5.53427	8.50352	0.00354459	0.0699517	protein_coding
Rpl32	ENSMUSG00000057841	388.667	608.694	0.647072	8.84274	8.50058	0.00355033	0.0699721	protein_coding
Slc45a4	ENSMUSG00000079020	3.56387	2.08629	-0.766636	4.66187	8.49516	0.00356092	0.0700879	protein_coding
Gse1	ENSMUSG00000031822	4.60227	2.67333	-0.779809	5.31414	8.49226	0.00356661	0.0701072	protein_coding
Steap3	ENSMUSG00000026389	6.02244	3.73183	-0.687044	4.87312	8.48756	0.00357584	0.0701958	protein_coding
Mtch2	ENSMUSG00000027282	17.0956	26.6185	0.638433	7.47214	8.47878	0.00359312	0.0703495	protein_coding
Mphosph6	ENSMUSG00000031843	3.8034	6.82302	0.838191	3.64039	8.4612	0.00362801	0.0709394	protein_coding
Zc3h13	ENSMUSG00000022000	5.37121	3.33977	-0.683165	4.81578	8.44732	0.00365582	0.0713409	protein_coding
Hectd2os	ENSMUSG00000087579	1.6951	3.97894	1.22391	3.37692	8.44191	0.00366671	0.0713409	processed_transcript
Sh3bgrl2	ENSMUSG00000032261	0.917594	1.71876	0.910699	3.2996	8.43825	0.00367409	0.0713409	protein_coding
Ifitm3	ENSMUSG00000025492	79.5631	120.878	0.60423	6.028	8.43693	0.00367677	0.0713409	protein_coding
Cib2	ENSMUSG00000037493	1.6554	7.20123	2.12168	2.52396	8.43666	0.00367732	0.0713409	protein_coding
Abcg2	ENSMUSG00000029802	5.55385	9.68286	0.800148	5.87755	8.43026	0.00369029	0.0714993	protein_coding
Zfp651	ENSMUSG00000013419	14.4537	9.37952	-0.623818	6.45735	8.42679	0.00369732	0.0715423	protein_coding
Rorc	ENSMUSG00000028150	17.6976	9.17944	-0.94775	5.67226	8.41873	0.00371374	0.0717205	protein_coding
1810037I17Rik	ENSMUSG00000054091	37.1246	57.5108	0.630242	5.71712	8.41755	0.00371616	0.0717205	protein_coding
Cul7	ENSMUSG00000038545	15.6167	9.7933	-0.671761	6.62335	8.4148	0.00372178	0.0717268	protein_coding
Dlc1	ENSMUSG00000031523	11.2172	7.06915	-0.665748	7.13508	8.41132	0.00372892	0.0717268	protein_coding
Letmd1	ENSMUSG00000037353	3.81733	11.0756	1.53862	4.13047	8.41033	0.00373095	0.0717268	protein_coding
Ago1	ENSMUSG00000041530	4.62952	2.7446	-0.750031	4.98183	8.40625	0.00373933	0.0717951	protein_coding
Farsb	ENSMUSG00000026245	19.2861	32.6567	0.758359	6.01351	8.40137	0.00374939	0.0718954	protein_coding
Rasd2	ENSMUSG00000034472	1.8524	0.837473	-1.12296	2.24252	8.38862	0.00377577	0.072158	protein_coding
Trib2	ENSMUSG00000020601	33.0527	21.7135	-0.606	6.93612	8.38651	0.00378017	0.072158	protein_coding
Zfp532	ENSMUSG00000042439	3.45184	2.18994	-0.65507	5.04894	8.38442	0.00378451	0.072158	protein_coding
Kifc5b	ENSMUSG00000024301	1.72032	3.24713	0.920165	2.63666	8.38199	0.00378958	0.072158	protein_coding
Tnfrsf12a	ENSMUSG00000023905	55.6838	98.0205	0.814607	6.12878	8.38075	0.00379217	0.072158	protein_coding
Alas2	ENSMUSG00000025270	11.617	18.2944	0.654137	5.10551	8.38074	0.00379217	0.072158	protein_coding
9030612E09Rik	ENSMUSG00000045008	1.34501	0.511016	-1.3701	1.00751	8.36833	0.00381816	0.0724212	protein_coding
Ndst1	ENSMUSG00000054008	13.5248	8.07145	-0.743473	6.10801	8.36729	0.00382034	0.0724212	protein_coding
Ugdh	ENSMUSG00000029201	3.28184	5.25347	0.680132	4.78612	8.36133	0.0038329	0.0725619	protein_coding
Crebbp	ENSMUSG00000022521	3.3002	2.09985	-0.649839	5.2596	8.34366	0.00387036	0.0731431	protein_coding
Rbbp8	ENSMUSG00000041238	3.98015	6.79612	0.767652	4.30858	8.33968	0.00387885	0.0731524	protein_coding
Slc25a42	ENSMUSG00000002346	9.90486	5.1954	-0.926845	5.59233	8.33611	0.00388648	0.0732035	protein_coding
Fyco1	ENSMUSG00000025241	20.7641	12.3582	-0.749437	7.26986	8.33106	0.00389729	0.0733144	protein_coding
Slc51a	ENSMUSG00000035699	1.65985	0.68817	-1.24918	1.10481	8.3168	0.003928	0.0737988	protein_coding
Kcnh2	ENSMUSG00000038319	42.1332	25.7106	-0.711654	7.42993	8.30683	0.00394962	0.0739373	protein_coding
Cdnf	ENSMUSG00000039496	1.66974	0.819855	-1.03795	2.08746	8.30653	0.00395028	0.0739373	protein_coding
Rars	ENSMUSG00000018848	16.0063	25.2425	0.655785	5.9924	8.29796	0.00396896	0.0741937	protein_coding
Tlx1	ENSMUSG00000025215	0.5869	1.77891	1.61426	1.27818	8.29409	0.00397742	0.0742585	protein_coding
Mmp28	ENSMUSG00000020682	5.23462	2.26301	-1.19859	3.98428	8.29042	0.00398548	0.0743157	protein_coding
Wbp1l	ENSMUSG00000047731	25.612	16.1124	-0.667423	6.60696	8.28372	0.00400021	0.0743214	protein_coding
Ip6k1	ENSMUSG00000032594	13.1134	8.4004	-0.64081	6.18912	8.28307	0.00400164	0.0743214	protein_coding
A2m	ENSMUSG00000030111	0.856173	1.69867	0.979884	3.07534	8.28121	0.00400574	0.0743214	protein_coding
1110018N20Rik	ENSMUSG00000085151	3.34963	1.51644	-1.13045	2.09143	8.2812	0.00400577	0.0743214	processed_transcript
Pimreg	ENSMUSG00000020808	7.3386	12.6953	0.790343	4.58797	8.27617	0.00401687	0.0744347	protein_coding
Prob1	ENSMUSG00000073600	7.44843	4.51883	-0.71667	4.94522	8.26602	0.00403939	0.0746127	protein_coding
Rps19	ENSMUSG00000040952	61.921	98.1774	0.664799	8.48433	8.26422	0.00404339	0.0746127	protein_coding
Wscd1	ENSMUSG00000020811	2.35341	1.24069	-0.914457	3.0535	8.2629	0.00404634	0.0746127	protein_coding
Crip1	ENSMUSG00000006360	43.9321	74.2177	0.755905	6.99827	8.26281	0.00404654	0.0746127	protein_coding
Cyp39a1	ENSMUSG00000023963	9.58153	16.1837	0.753727	5.22386	8.25371	0.00406688	0.0748951	protein_coding
Aprt	ENSMUSG00000006589	19.5215	32.7519	0.744991	5.32675	8.23997	0.00409779	0.0751805	protein_coding
Aqp4	ENSMUSG00000024411	5.30309	10.0077	0.913542	5.19165	8.23963	0.00409855	0.0751805	protein_coding
Phf2	ENSMUSG00000038025	10.0813	6.03717	-0.736879	5.48045	8.23944	0.00409898	0.0751805	protein_coding
Ppp1r13l	ENSMUSG00000040734	18.0571	10.5988	-0.765162	5.76719	8.23784	0.00410259	0.0751805	protein_coding
Stmn1	ENSMUSG00000028832	52.0294	82.7118	0.668566	6.9503	8.23176	0.00411636	0.0753219	protein_coding
Gpx1	ENSMUSG00000063856	82.2704	124.081	0.59275	7.15725	8.22471	0.00413238	0.0753219	protein_coding
Mapk13	ENSMUSG00000004864	0.265838	1.10026	2.04152	0.0713384	8.22441	0.00413307	0.0753219	protein_coding
Rps4x	ENSMUSG00000031320	482.579	808.179	0.743831	9.96518	8.22188	0.00413882	0.0753219	protein_coding
Taf9b	ENSMUSG00000047242	6.4226	10.3047	0.680146	4.65889	8.22045	0.00414209	0.0753219	protein_coding
Tsc22d4	ENSMUSG00000029723	26.7541	16.296	-0.714259	7.40611	8.21907	0.00414525	0.0753219	protein_coding
Scfd1	ENSMUSG00000020952	19.7428	30.802	0.640088	5.6614	8.2182	0.00414723	0.0753219	protein_coding
Zbtb34	ENSMUSG00000068966	2.7341	1.51095	-0.852457	3.90141	8.21664	0.0041508	0.0753219	protein_coding
Alcam	ENSMUSG00000022636	1.40489	2.61937	0.899909	3.7638	8.20745	0.00417188	0.0756122	protein_coding
Gbe1	ENSMUSG00000022707	9.93809	15.354	0.627143	6.01929	8.19962	0.00418992	0.0757575	protein_coding
Cbx6	ENSMUSG00000089715	18.9876	11.728	-0.693734	6.66248	8.19955	0.00419008	0.0757575	protein_coding
Ncor2	ENSMUSG00000029478	11.649	6.13309	-0.923559	6.63215	8.19006	0.00421206	0.0759702	protein_coding
Ntn4	ENSMUSG00000020019	16.1712	10.3718	-0.64179	5.69869	8.18375	0.00422673	0.0761425	protein_coding
Dzip3	ENSMUSG00000064061	1.07706	2.34283	1.11523	3.84824	8.17825	0.00423956	0.0762813	protein_coding
Ercc6l	ENSMUSG00000051220	1.39648	2.74205	0.968978	3.36525	8.1686	0.00426217	0.0765956	protein_coding
Ppm1j	ENSMUSG00000002228	23.8416	15.016	-0.664781	5.20816	8.16444	0.00427197	0.076679	protein_coding
0610040J01Rik	ENSMUSG00000060512	0.243596	1.35845	2.46954	0.877875	8.15815	0.00428681	0.0767603	protein_coding
Cenpj	ENSMUSG00000064128	1.37714	2.62766	0.924345	3.04499	8.15422	0.0042961	0.0768341	protein_coding
R3hdm4	ENSMUSG00000035781	59.4147	38.4783	-0.625596	6.59918	8.14087	0.00432786	0.0772164	protein_coding
2310002L09Rik	ENSMUSG00000028396	0.450276	1.12831	1.30409	0.714665	8.13419	0.00434383	0.077316	protein_coding
Pde7b	ENSMUSG00000019990	1.15346	0.618506	-0.891689	3.56302	8.1306	0.00435243	0.0773608	protein_coding
Chmp4c	ENSMUSG00000027536	1.58304	2.66346	0.747302	4.35101	8.12881	0.00435674	0.0773608	protein_coding
Rsph9	ENSMUSG00000023966	1.14771	2.43782	1.0827	1.45876	8.11662	0.00438613	0.0777897	protein_coding
Ttyh3	ENSMUSG00000036565	23.7384	13.9926	-0.760981	6.81895	8.11338	0.00439398	0.0778362	protein_coding
Zc3h7b	ENSMUSG00000022390	24.9107	15.6428	-0.670425	6.98246	8.1107	0.00440046	0.0778584	protein_coding
Gpc3	ENSMUSG00000055653	37.3028	56.1751	0.590439	6.91582	8.09227	0.00444544	0.0785607	protein_coding
Smpx	ENSMUSG00000041476	154.841	256.646	0.728793	8.79755	8.08713	0.00445806	0.0786477	protein_coding
Kank3	ENSMUSG00000042099	19.1959	11.2093	-0.772555	5.64482	8.08494	0.00446347	0.0786477	protein_coding
Ddit4	ENSMUSG00000020108	34.5974	20.7988	-0.734628	5.61836	8.08382	0.00446621	0.0786477	protein_coding
Tspan18	ENSMUSG00000027217	9.43018	5.6801	-0.728729	6.02146	8.06338	0.0045169	0.0794461	protein_coding
Gpam	ENSMUSG00000024978	12.0408	6.97726	-0.783416	5.26743	8.05666	0.00453368	0.0796471	protein_coding
Efemp1	ENSMUSG00000020467	1.76668	6.22066	1.81232	2.87846	8.0533	0.00454208	0.0797006	protein_coding
2700081O15Rik	ENSMUSG00000053080	11.8088	7.02016	-0.747939	6.12322	8.04003	0.00457547	0.0801125	protein_coding
Phactr4	ENSMUSG00000066043	6.84279	4.24957	-0.68552	4.85358	8.0397	0.00457632	0.0801125	protein_coding
Slc4a4	ENSMUSG00000060961	1.67475	2.6678	0.669889	4.49113	8.02437	0.0046152	0.0805534	protein_coding
Tcap	ENSMUSG00000007877	231.008	148.183	-0.640098	7.55234	8.02267	0.00461954	0.0805534	protein_coding
Cerk	ENSMUSG00000035891	10.4537	6.66487	-0.646838	5.43072	8.02125	0.00462316	0.0805534	protein_coding
Mgst1	ENSMUSG00000008540	5.60366	16.2886	1.54038	4.32602	8.01528	0.00463842	0.0807215	protein_coding
Asrgl1	ENSMUSG00000024654	10.1842	6.40397	-0.670155	5.22431	8.01324	0.00464367	0.0807215	protein_coding
Pcna	ENSMUSG00000027342	30.388	55.252	0.861566	6.59746	8.01113	0.00464908	0.0807215	protein_coding
Dctpp1	ENSMUSG00000042462	50.1198	82.9644	0.725146	5.42033	8.00352	0.00466866	0.0809669	protein_coding
Asb15	ENSMUSG00000029685	1.40714	0.63517	-1.16225	2.33873	7.99632	0.00468724	0.0811474	protein_coding
Srsf3	ENSMUSG00000071172	32.8185	51.0797	0.637821	7.67994	7.99527	0.00468997	0.0811474	protein_coding
Bche	ENSMUSG00000027792	5.38227	9.85247	0.870111	5.59609	7.9823	0.0047237	0.081636	protein_coding
Hdac5	ENSMUSG00000008855	17.8861	11.2511	-0.667853	7.06471	7.97504	0.00474268	0.081869	protein_coding
Rpl13	ENSMUSG00000000740	241.41	377.436	0.644696	9.58447	7.97128	0.00475253	0.081944	protein_coding
Zbtb12	ENSMUSG00000049823	8.90885	5.0954	-0.808373	3.91049	7.95989	0.00478254	0.0823659	protein_coding
Arhgap19	ENSMUSG00000025154	1.72763	3.03556	0.812473	3.54171	7.95188	0.00480374	0.0826355	protein_coding
Abce1	ENSMUSG00000058355	13.5667	22.1514	0.706267	6.67429	7.94949	0.00481008	0.082649	protein_coding
Eml1	ENSMUSG00000058070	11.0611	7.37956	-0.58451	6.15811	7.9404	0.00483433	0.0828808	protein_coding
Rps27l	ENSMUSG00000036781	84.0827	129.367	0.621115	6.38331	7.94025	0.00483471	0.0828808	protein_coding
Pi4k2b	ENSMUSG00000029186	1.52577	2.78494	0.869137	2.95181	7.93571	0.00484686	0.0829933	protein_coding
Gmnn	ENSMUSG00000006715	17.8315	31.1245	0.800881	5.08584	7.9275	0.00486889	0.0831701	protein_coding
Cgref1	ENSMUSG00000029161	0.384393	1.16573	1.61849	0.668399	7.9214	0.00488535	0.0831739	protein_coding
Mrpl46	ENSMUSG00000030612	19.1353	29.9394	0.644144	5.05612	7.91668	0.0048981	0.0832587	protein_coding
Tldc1	ENSMUSG00000034105	5.67491	3.48935	-0.699329	4.31917	7.91009	0.00491597	0.0832988	protein_coding
Prr12	ENSMUSG00000046574	6.94223	3.70966	-0.899449	5.348	7.91008	0.00491601	0.0832988	protein_coding
Dnttip2	ENSMUSG00000039756	9.84591	15.6025	0.662039	5.33188	7.90836	0.00492068	0.0832988	protein_coding
Fkbp10	ENSMUSG00000001555	52.3725	29.9052	-0.806875	6.99406	7.90535	0.00492888	0.0833253	protein_coding
Myo18a	ENSMUSG00000000631	15.9045	10.1368	-0.649209	7.76944	7.90368	0.00493344	0.0833253	protein_coding
Camta2	ENSMUSG00000040712	7.81943	4.61648	-0.755524	5.09498	7.88984	0.00497134	0.0838702	protein_coding
Polr3k	ENSMUSG00000038628	5.60361	9.41726	0.745223	4.48106	7.88564	0.00498287	0.0839696	protein_coding
Tmem120a	ENSMUSG00000039886	11.2854	18.8122	0.740231	4.6354	7.88174	0.00499364	0.0840559	protein_coding
Brd1	ENSMUSG00000022387	7.05337	4.50107	-0.645528	5.62116	7.87327	0.00501709	0.08426	protein_coding
Erc1	ENSMUSG00000030172	3.70263	2.43324	-0.605846	5.70313	7.84693	0.00509071	0.0853039	protein_coding
Wdfy3	ENSMUSG00000043940	2.97464	1.76193	-0.75555	5.25996	7.83582	0.00512209	0.0856368	protein_coding
Chchd1	ENSMUSG00000063787	83.2537	137.415	0.721269	5.94597	7.83288	0.00513042	0.0856797	protein_coding
Amd1	ENSMUSG00000075232	8.86319	13.6845	0.625658	5.25942	7.83052	0.00513713	0.0856933	protein_coding
Neurl4	ENSMUSG00000047284	10.66	6.74423	-0.657952	5.74624	7.82516	0.00515238	0.0856933	protein_coding
Tecrl	ENSMUSG00000049537	9.92142	20.7189	1.0597	5.06523	7.82495	0.005153	0.0856933	protein_coding
Numa1	ENSMUSG00000066306	20.678	13.2312	-0.643318	7.1323	7.82034	0.00516615	0.085795	protein_coding
Fcgr3	ENSMUSG00000059498	4.49087	8.59196	0.939842	3.42959	7.81775	0.00517357	0.0858224	protein_coding
Srsf7	ENSMUSG00000024097	25.945	40.7464	0.649925	6.18369	7.81078	0.00519354	0.0860438	protein_coding
H2afx	ENSMUSG00000049932	37.7834	57.9552	0.618477	5.99028	7.8058	0.00520787	0.0860438	protein_coding
Klf11	ENSMUSG00000020653	15.2648	10.1009	-0.59489	5.80554	7.80505	0.00521005	0.0860438	protein_coding
Cdk18	ENSMUSG00000026437	1.60004	0.78322	-1.01043	2.63292	7.80156	0.00522011	0.0860746	protein_coding
Abat	ENSMUSG00000057880	2.81817	4.73403	0.749346	4.80001	7.8004	0.00522348	0.0860746	protein_coding
Snrpg	ENSMUSG00000057278	17.4949	27.3593	0.64319	5.07652	7.79733	0.00523236	0.0861256	protein_coding
Rgs12	ENSMUSG00000029101	8.77681	5.74219	-0.610483	5.97007	7.79437	0.00524094	0.0861715	protein_coding
Myl7	ENSMUSG00000020469	499.451	912.352	0.869282	8.61561	7.77692	0.00529178	0.0869114	protein_coding
Lrrc20	ENSMUSG00000037151	10.9602	6.78071	-0.693061	4.61101	7.76242	0.00533444	0.0875154	protein_coding
Adss	ENSMUSG00000015961	4.59959	7.18056	0.641031	4.67856	7.75811	0.0053472	0.0876282	protein_coding
Ccdc14	ENSMUSG00000022833	1.43535	2.56334	0.833816	2.9694	7.75322	0.00536169	0.0877689	protein_coding
Kdm4a	ENSMUSG00000033326	10.7883	6.82017	-0.658756	5.73687	7.74758	0.00537847	0.0879468	protein_coding
Bcl6b	ENSMUSG00000000317	10.5373	6.01911	-0.805735	5.02614	7.74516	0.00538566	0.0879511	protein_coding
Ddias	ENSMUSG00000030641	0.991641	2.03956	1.03477	2.4015	7.74352	0.00539055	0.0879511	protein_coding
Irx4	ENSMUSG00000021604	49.2332	29.2946	-0.747217	6.75086	7.73997	0.00540118	0.0880281	protein_coding
Cers4	ENSMUSG00000008206	4.93099	3.25188	-0.601644	5.71013	7.73782	0.0054076	0.0880362	protein_coding
Ormdl2	ENSMUSG00000025353	3.93454	6.80532	0.790064	3.39892	7.73557	0.00541435	0.0880497	protein_coding
Gsta4	ENSMUSG00000032348	34.9491	54.4113	0.636918	5.7596	7.73217	0.00542456	0.0881195	protein_coding
Rpl10a	ENSMUSG00000037805	161.468	254.707	0.657459	8.86721	7.72927	0.00543326	0.0881645	protein_coding
Plcd3	ENSMUSG00000020937	12.3597	8.05434	-0.619492	5.17811	7.72088	0.00545858	0.0883827	protein_coding
Racgap1	ENSMUSG00000023015	6.59703	11.4874	0.800998	5.92224	7.70896	0.00549474	0.0888714	protein_coding
Cic	ENSMUSG00000005442	12.6109	7.73416	-0.703876	6.77962	7.69858	0.00552644	0.0891902	protein_coding
D830039M14Rik	ENSMUSG00000043126	1.53487	0.650367	-1.21889	1.08221	7.69001	0.00555274	0.0893924	antisense_RNA
Zer1	ENSMUSG00000039686	5.72344	3.65008	-0.646046	5.58539	7.68863	0.00555699	0.0893924	protein_coding
Rbmx	ENSMUSG00000031134	12.4742	18.5199	0.570474	6.013	7.68486	0.00556861	0.0894634	protein_coding
Rpl3-ps1	ENSMUSG00000084349	18.2988	58.6116	1.6796	5.38165	7.6833	0.00557342	0.0894634	processed_pseudogene
Prox1	ENSMUSG00000010175	10.8365	7.15464	-0.600019	6.29775	7.67666	0.00559397	0.0896964	protein_coding
Mthfd2	ENSMUSG00000005667	1.56535	3.44954	1.14275	3.02898	7.67006	0.00561447	0.0899283	protein_coding
Adam22	ENSMUSG00000040537	0.801881	1.32858	0.73197	3.87164	7.65128	0.0056732	0.0906738	protein_coding
Rangap1	ENSMUSG00000022391	20.9939	32.0165	0.60893	6.35152	7.64692	0.00568694	0.0907958	protein_coding
Lgals9	ENSMUSG00000001123	29.1327	43.0468	0.563015	6.21409	7.63807	0.0057149	0.0910596	protein_coding
Maf1	ENSMUSG00000022553	56.6176	37.5787	-0.590579	6.88652	7.63768	0.00571615	0.0910596	protein_coding
Stard8	ENSMUSG00000031216	9.19742	5.64122	-0.701724	5.42233	7.63589	0.00572183	0.0910596	protein_coding
Ost4	ENSMUSG00000038803	54.99	85.5672	0.636881	6.41922	7.62612	0.00575289	0.0914562	protein_coding
Atpaf2	ENSMUSG00000042709	13.2898	20.6111	0.635041	5.11962	7.6178	0.00577949	0.0915034	protein_coding
Cfl1	ENSMUSG00000056201	194.012	303.888	0.647298	9.12989	7.61772	0.00577976	0.0915034	protein_coding
Hhatl	ENSMUSG00000032523	20.085	13.3324	-0.591121	5.51563	7.6175	0.00578046	0.0915034	protein_coding
Rtp4	ENSMUSG00000033355	2.88443	5.04101	0.802098	3.01313	7.60936	0.00580662	0.0918199	protein_coding
Nfe2l1	ENSMUSG00000038615	60.685	40.1632	-0.595253	8.15809	7.60592	0.0058177	0.0918975	protein_coding
Gapdh	ENSMUSG00000057666	796.037	1341.7	0.753139	12.0335	7.60024	0.00583607	0.0920898	protein_coding
Tet3	ENSMUSG00000034832	3.19374	1.93141	-0.723629	5.49224	7.59479	0.00585371	0.0922331	protein_coding
Gipr	ENSMUSG00000030406	1.68389	4.70109	1.47471	3.3305	7.59281	0.00586015	0.0922331	protein_coding
Brca1	ENSMUSG00000017146	0.689567	1.55676	1.16754	3.14707	7.58812	0.00587543	0.0922331	protein_coding
Shank3	ENSMUSG00000022623	5.85076	3.16813	-0.880943	5.41409	7.5879	0.00587614	0.0922331	protein_coding
Sh2b2	ENSMUSG00000005057	0.254811	1.37459	2.43078	2.00177	7.5823	0.00589443	0.0923361	protein_coding
Ica1	ENSMUSG00000062995	3.50217	5.96409	0.772683	3.87451	7.57771	0.00590943	0.0923361	protein_coding
Sez6l2	ENSMUSG00000030683	2.77185	1.2725	-1.10812	3.21304	7.57682	0.00591235	0.0923361	protein_coding
Gm15440	ENSMUSG00000051107	11.6382	6.7557	-0.776939	3.591	7.5764	0.00591373	0.0923361	protein_coding
Agpat3	ENSMUSG00000001211	33.1369	20.9826	-0.658738	7.74399	7.57228	0.00592728	0.0924506	protein_coding
Hspb6	ENSMUSG00000036854	76.6353	46.5609	-0.71776	7.21586	7.56763	0.00594258	0.0925041	protein_coding
Mrps14	ENSMUSG00000058267	9.91695	15.6723	0.658164	5.31767	7.56746	0.00594314	0.0925041	protein_coding
Wdtc1	ENSMUSG00000037622	18.8385	12.1022	-0.636471	6.2784	7.56366	0.00595569	0.0925216	protein_coding
Dynlt1a	ENSMUSG00000092074	12.5065	23.8201	0.925616	3.66522	7.56336	0.0059567	0.0925216	protein_coding
Dopey2	ENSMUSG00000022946	2.43125	1.38791	-0.799703	3.89366	7.55431	0.00598669	0.0928904	protein_coding
Acsf2	ENSMUSG00000076435	10.2314	6.07531	-0.746242	4.88474	7.55184	0.00599487	0.0929205	protein_coding
Ech1	ENSMUSG00000053898	309.425	156.043	-0.987619	9.14655	7.54728	0.00601006	0.0930152	protein_coding
Nabp1	ENSMUSG00000026107	2.2599	3.56898	0.656488	4.56884	7.54626	0.00601348	0.0930152	protein_coding
Rnf216	ENSMUSG00000045078	6.84701	4.12381	-0.72744	5.37463	7.53807	0.00604089	0.0933421	protein_coding
Lsm6	ENSMUSG00000031683	5.59435	9.01079	0.685784	4.82999	7.53445	0.006053	0.0934218	protein_coding
Tank	ENSMUSG00000064289	2.66813	4.20596	0.654887	4.32892	7.53279	0.00605861	0.0934218	protein_coding
Bex2	ENSMUSG00000042750	0.878823	2.57808	1.56646	0.624969	7.52665	0.00607928	0.0934892	protein_coding
Ppa1	ENSMUSG00000020089	7.40287	13.2223	0.838083	4.82398	7.5259	0.00608182	0.0934892	protein_coding
Depdc1b	ENSMUSG00000021697	0.794716	1.77416	1.16124	2.02147	7.52188	0.0060954	0.0936012	protein_coding
Zc3h14	ENSMUSG00000021012	23.5967	37.7838	0.678346	6.93709	7.508	0.00614255	0.094131	protein_coding
Mrpl42	ENSMUSG00000062981	306.194	521.372	0.767502	8.02959	7.50209	0.00616274	0.0943432	protein_coding
Rpl41	ENSMUSG00000093674	649.071	1009.11	0.636592	9.8555	7.49629	0.00618262	0.0944376	protein_coding
Itga9	ENSMUSG00000039115	9.48662	6.20951	-0.6101	5.97724	7.49349	0.00619225	0.0944376	protein_coding
2900026A02Rik	ENSMUSG00000051339	7.86013	4.95345	-0.664393	6.18095	7.49289	0.00619429	0.0944376	protein_coding
Emilin1	ENSMUSG00000029163	27.1361	17.5637	-0.626374	6.84797	7.48321	0.00622769	0.0947462	protein_coding
Tmem151a	ENSMUSG00000061451	0.401947	1.14919	1.5078	1.79917	7.48301	0.00622839	0.0947462	protein_coding
Bola3	ENSMUSG00000045160	21.7118	36.0107	0.729448	6.46176	7.47123	0.00626927	0.0951355	protein_coding
Syk	ENSMUSG00000021457	4.57222	2.97074	-0.62354	5.20648	7.47044	0.00627204	0.0951355	protein_coding
Rilpl1	ENSMUSG00000029392	29.2096	19.5332	-0.581808	5.96623	7.46154	0.00630312	0.0955053	protein_coding
Prdm16	ENSMUSG00000039410	2.38065	1.47446	-0.69067	4.24226	7.45805	0.00631535	0.0955053	protein_coding
L3mbtl3	ENSMUSG00000039089	3.59264	2.09567	-0.774364	3.81202	7.45514	0.00632557	0.0955053	protein_coding
Btf3l4	ENSMUSG00000028568	12.3897	19.0568	0.619731	6.09843	7.45456	0.00632759	0.0955053	protein_coding
Rhob	ENSMUSG00000054364	87.027	54.4258	-0.676197	7.36283	7.4543	0.00632851	0.0955053	protein_coding
D3Ertd751e	ENSMUSG00000025766	1.84363	3.63087	0.972082	3.89944	7.44772	0.00635168	0.0957578	protein_coding
Txnrd3	ENSMUSG00000000811	15.3843	9.98967	-0.62069	5.23382	7.43688	0.00639007	0.0961457	protein_coding
Fam78b	ENSMUSG00000060568	1.06055	0.529682	-0.983628	2.45726	7.43657	0.00639116	0.0961457	protein_coding
Tmem161b	ENSMUSG00000035762	4.93583	8.35382	0.754454	4.02541	7.43207	0.00640717	0.0961457	protein_coding
Nme1	ENSMUSG00000037601	3.65402	6.32985	0.792912	3.98797	7.43089	0.00641138	0.0961457	protein_coding
Tmsb4x	ENSMUSG00000049775	394.888	622.931	0.65753	9.38053	7.43056	0.00641253	0.0961457	protein_coding
Tnni2	ENSMUSG00000031097	3.70516	6.89147	0.89435	2.91249	7.42873	0.00641907	0.0961457	protein_coding
Edn1	ENSMUSG00000021367	2.93344	5.42706	0.883419	3.21502	7.42773	0.00642264	0.0961457	protein_coding
Ska3	ENSMUSG00000021965	2.24207	4.45325	0.994227	2.83965	7.42287	0.00644	0.0963087	protein_coding
Neurl3	ENSMUSG00000047180	2.15584	1.10972	-0.951281	2.51337	7.41642	0.00646313	0.0965214	protein_coding
Eprs	ENSMUSG00000026615	5.77823	9.17417	0.666146	7.01406	7.41326	0.00647448	0.0965214	protein_coding
Gm12663	ENSMUSG00000101316	0.764315	2.12134	1.47346	0.431699	7.41001	0.0064862	0.0965214	processed_pseudogene
Ralgds	ENSMUSG00000026821	8.5756	5.25256	-0.704442	5.48388	7.40988	0.00648665	0.0965214	protein_coding
Chsy1	ENSMUSG00000032640	13.0878	8.6447	-0.597179	5.56529	7.40495	0.00650445	0.0966181	protein_coding
Irf8	ENSMUSG00000041515	2.34732	1.39345	-0.748984	3.80579	7.40335	0.00651026	0.0966181	protein_coding
Pkm	ENSMUSG00000032294	211.772	341.727	0.690287	10.3653	7.39922	0.00652523	0.0967086	protein_coding
Eml5	ENSMUSG00000051166	0.50348	1.08526	1.09805	2.90763	7.38958	0.00656028	0.0970348	protein_coding
Lrig1	ENSMUSG00000030029	9.86056	6.3551	-0.631139	5.56582	7.38543	0.00657542	0.0971622	protein_coding
Mum1l1	ENSMUSG00000042515	2.97471	5.83733	0.968258	4.32506	7.37927	0.00659798	0.0973987	protein_coding
Rnf44	ENSMUSG00000034928	14.2141	9.28929	-0.611988	5.99592	7.37508	0.00661337	0.0974327	protein_coding
Cstb	ENSMUSG00000005054	35.0502	54.4801	0.635565	4.68634	7.3643	0.00665314	0.0979217	protein_coding
Obscn	ENSMUSG00000061462	20.5723	13.6539	-0.591466	9.00742	7.36215	0.00666112	0.0979421	protein_coding
Gpr157	ENSMUSG00000047875	5.79427	3.50049	-0.720844	4.58666	7.3582	0.00667578	0.0980608	protein_coding
Xpo1	ENSMUSG00000020290	10.4544	18.1512	0.794848	6.60321	7.3559	0.00668432	0.0980622	protein_coding
Ssb	ENSMUSG00000068882	38.9583	65.0841	0.739535	6.73874	7.35462	0.00668906	0.0980622	protein_coding
Rab15	ENSMUSG00000021062	0.578835	1.66489	1.53082	2.27801	7.34455	0.00672663	0.0985159	protein_coding
Rpl38	ENSMUSG00000057322	316.41	484.224	0.613629	7.70016	7.33865	0.00674876	0.0987429	protein_coding
Ace	ENSMUSG00000020681	5.82301	3.10632	-0.899449	4.65457	7.33287	0.0067705	0.0989153	protein_coding
Rit1	ENSMUSG00000028057	28.2981	18.5607	-0.609902	6.30211	7.33198	0.00677383	0.0989153	protein_coding
Zfpm2	ENSMUSG00000022306	8.08882	5.22794	-0.632882	5.11471	7.3289	0.00678547	0.0989881	protein_coding
Ldb3	ENSMUSG00000021798	157.928	103.927	-0.603659	9.67995	7.30766	0.00686612	0.0999748	protein_coding
Postn	ENSMUSG00000027750	99.1626	161.294	0.701743	10.0758	7.30755	0.00686655	0.0999748	protein_coding
Carns1	ENSMUSG00000075289	14.3272	9.33335	-0.619527	5.61573	7.29919	0.00689856	0.100343	protein_coding
Aldoa	ENSMUSG00000030695	482.043	744.878	0.627841	11.1092	7.29598	0.00691091	0.100424	protein_coding
Abcd1	ENSMUSG00000031378	10.0931	6.15421	-0.708912	5.16355	7.2885	0.00693974	0.100745	protein_coding
Rpl21	ENSMUSG00000041453	145.209	231.719	0.674119	9.25607	7.28554	0.00695118	0.100812	protein_coding
Prpf38a	ENSMUSG00000063800	5.83671	9.03428	0.628339	5.23936	7.28049	0.00697077	0.100998	protein_coding
Plcg1	ENSMUSG00000016933	11.5204	7.31773	-0.65272	6.27494	7.2775	0.00698238	0.101068	protein_coding
Rps12	ENSMUSG00000061983	859.29	1331.21	0.631375	8.96276	7.27504	0.00699193	0.101108	protein_coding
Amigo1	ENSMUSG00000050947	3.24365	1.96492	-0.718831	3.93177	7.27261	0.00700141	0.101147	protein_coding
Rpl7	ENSMUSG00000043716	236.687	378.922	0.678821	9.62376	7.26844	0.00701768	0.101173	protein_coding
Cd44	ENSMUSG00000005087	2.45112	3.7934	0.63117	4.34666	7.26694	0.00702352	0.101173	protein_coding
Ablim2	ENSMUSG00000029095	1.87697	1.08674	-0.788898	3.47559	7.26692	0.00702361	0.101173	protein_coding
Mut	ENSMUSG00000023921	14.3096	24.9594	0.800976	6.09353	7.26088	0.00704728	0.101415	protein_coding
Cox6b1	ENSMUSG00000036751	976.112	1574.41	0.689617	9.74919	7.25614	0.00706589	0.101445	protein_coding
Erdr1	ENSMUSG00000096768	17.2701	4.52276	-1.94177	3.78701	7.25423	0.00707344	0.101445	protein_coding
Zfp768	ENSMUSG00000047371	20.5934	12.8807	-0.673237	5.46888	7.25312	0.00707781	0.101445	protein_coding
Fam171a1	ENSMUSG00000050530	12.6125	8.37801	-0.588696	5.6035	7.24984	0.00709074	0.101445	protein_coding
Dchs1	ENSMUSG00000036862	3.72083	2.03683	-0.865389	5.07907	7.2498	0.0070909	0.101445	protein_coding
Kif1c	ENSMUSG00000020821	51.511	32.8419	-0.648901	8.32457	7.24824	0.00709707	0.101445	protein_coding
Tkt	ENSMUSG00000021957	7.817	16.1013	1.04346	6.18737	7.24492	0.00711019	0.101535	protein_coding
C2cd3	ENSMUSG00000047248	2.1992	1.33068	-0.721051	4.48115	7.23306	0.00715732	0.101942	protein_coding
Ushbp1	ENSMUSG00000034911	6.97299	4.62846	-0.590391	5.28959	7.2312	0.00716472	0.101942	protein_coding
Gm12070	ENSMUSG00000069939	1.23082	2.76697	1.14923	0.947359	7.23087	0.00716606	0.101942	processed_pseudogene
Zfp646	ENSMUSG00000049739	3.60547	2.16184	-0.733173	4.88625	7.20883	0.00725459	0.102969	protein_coding
Rps16	ENSMUSG00000037563	275.797	426.035	0.627183	8.7324	7.20577	0.00726694	0.102969	protein_coding
Smg6	ENSMUSG00000038290	5.36079	3.29385	-0.699122	5.26533	7.20489	0.00727053	0.102969	protein_coding
Txlnb	ENSMUSG00000039891	31.8478	20.1833	-0.659002	7.22607	7.2001	0.00728996	0.103113	protein_coding
Rps6ka2	ENSMUSG00000023809	10.9544	7.01368	-0.64183	5.66667	7.19757	0.00730024	0.103125	protein_coding
Crocc	ENSMUSG00000040860	1.32771	0.672509	-0.964066	3.16169	7.19601	0.0073066	0.103125	protein_coding
Fam81a	ENSMUSG00000032224	5.93062	10.3249	0.799889	5.08205	7.18274	0.00736083	0.103721	protein_coding
Cfap36	ENSMUSG00000020462	8.50357	13.7012	0.684917	4.86342	7.1792	0.00737537	0.103777	protein_coding
Lingo3	ENSMUSG00000051067	1.22042	0.598501	-1.01732	1.78816	7.17838	0.00737874	0.103777	protein_coding
Ifi204	ENSMUSG00000073489	0.780948	1.72876	1.15014	2.09264	7.17479	0.00739349	0.103779	protein_coding
Cct5	ENSMUSG00000022234	81.2577	125.371	0.625312	8.11838	7.17411	0.00739633	0.103779	protein_coding
Eif2s2	ENSMUSG00000074656	16.7386	26.9624	0.687037	7.13707	7.17213	0.00740449	0.103779	protein_coding
Mypn	ENSMUSG00000020067	15.063	10.2355	-0.556775	6.1087	7.16872	0.00741856	0.103779	protein_coding
Fam83d	ENSMUSG00000027654	3.85119	7.22279	0.910295	4.38247	7.16837	0.00742002	0.103779	protein_coding
Pola1	ENSMUSG00000006678	1.3072	2.87359	1.13216	4.09175	7.16755	0.0074234	0.103779	protein_coding
Unc5b	ENSMUSG00000020099	11.4666	6.96389	-0.717977	5.8248	7.1665	0.00742773	0.103779	protein_coding
Impact	ENSMUSG00000024423	2.84928	5.03766	0.81621	3.68367	7.16119	0.0074498	0.10399	protein_coding
Gm10123	ENSMUSG00000062933	49.8481	82.8066	0.729311	4.95156	7.15589	0.00747184	0.104185	processed_pseudogene
Rps29	ENSMUSG00000034892	679.725	1055.48	0.634764	9.16814	7.15445	0.00747782	0.104185	protein_coding
Kmt2d	ENSMUSG00000048154	2.55123	1.65633	-0.623117	5.45064	7.15153	0.00748999	0.104257	protein_coding
Pif1	ENSMUSG00000041064	0.921852	1.90102	1.05346	2.55669	7.14271	0.00752692	0.104673	protein_coding
Mir17hg	ENSMUSG00000089726	0.440563	1.24183	1.47424	1.45498	7.13743	0.00754912	0.104754	lincRNA
Ppp1r1b	ENSMUSG00000061718	12.8718	20.2829	0.657056	5.53802	7.13677	0.00755192	0.104754	protein_coding
Bcap31	ENSMUSG00000002015	46.67	70.5899	0.595873	6.10075	7.13631	0.00755385	0.104754	protein_coding
Plec	ENSMUSG00000022565	11.8544	7.75519	-0.61153	7.53252	7.12693	0.00759348	0.105202	protein_coding
Rpl27a	ENSMUSG00000046364	152.111	235.016	0.627503	9.0057	7.11802	0.00763131	0.105435	protein_coding
Zfp101	ENSMUSG00000055240	0.566307	1.04178	0.872468	2.51129	7.10273	0.00769668	0.106187	protein_coding
Gnl3	ENSMUSG00000042354	10.1532	15.6581	0.623402	4.54567	7.10195	0.0077	0.106187	protein_coding
Tbc1d5	ENSMUSG00000023923	5.79909	3.81816	-0.60312	4.8185	7.09867	0.00771412	0.106279	protein_coding
Gm13835	ENSMUSG00000086922	8.09321	15.1988	0.907396	2.91793	7.09333	0.00773714	0.106279	processed_pseudogene
Cep57	ENSMUSG00000031922	5.51064	8.9424	0.695085	4.85006	7.09259	0.00774032	0.106279	protein_coding
Mrap	ENSMUSG00000039956	16.4095	25.2271	0.621961	4.87249	7.09061	0.00774888	0.106279	protein_coding
Selenos	ENSMUSG00000075701	14.8117	22.6213	0.611919	4.73292	7.09055	0.00774913	0.106279	protein_coding
Rab33a	ENSMUSG00000031104	0.669017	1.55017	1.20224	0.353179	7.09047	0.00774948	0.106279	protein_coding
Gm4604	ENSMUSG00000091845	8.37194	3.0865	-1.42181	1.35398	7.08756	0.00776208	0.106353	processed_pseudogene
Lrif1	ENSMUSG00000056260	1.39146	2.31704	0.733091	4.02549	7.08296	0.00778202	0.106478	protein_coding
Ptprm	ENSMUSG00000033278	10.4451	6.74773	-0.628396	5.64533	7.08216	0.0077855	0.106478	protein_coding
Adamts2	ENSMUSG00000036545	5.59778	3.36837	-0.728809	5.46181	7.0648	0.00786132	0.107345	protein_coding
Tra2b	ENSMUSG00000022858	17.8617	28.2303	0.659564	6.88916	7.06435	0.00786329	0.107345	protein_coding
Ints6l	ENSMUSG00000035967	2.17078	3.93009	0.852448	4.37069	7.06185	0.00787427	0.107396	protein_coding
Ncoa2	ENSMUSG00000005886	3.8501	2.50879	-0.619489	5.69865	7.06022	0.00788145	0.107396	protein_coding
Rpl9	ENSMUSG00000047215	115.285	172.668	0.582672	8.7347	7.05369	0.00791021	0.107689	protein_coding
Gm10736	ENSMUSG00000096842	613.352	941.767	0.61802	5.86225	7.04903	0.0079308	0.107777	processed_pseudogene
Pik3ip1	ENSMUSG00000034614	15.324	10.0231	-0.611748	5.82096	7.04896	0.00793115	0.107777	protein_coding
Cep192	ENSMUSG00000024542	1.73748	2.93252	0.750312	4.16885	7.04522	0.0079477	0.107903	protein_coding
Shisa4	ENSMUSG00000041889	6.97842	4.26571	-0.705644	3.8452	7.04314	0.00795696	0.10793	protein_coding
Nppa	ENSMUSG00000041616	1005.34	1770.32	0.816382	10.1477	7.04062	0.00796812	0.107983	protein_coding
Sned1	ENSMUSG00000047793	2.01828	1.03351	-0.968573	3.95863	7.03722	0.00798326	0.10809	protein_coding
Itgb3bp	ENSMUSG00000028549	2.11605	3.8312	0.850792	3.7053	7.02951	0.00801773	0.108458	protein_coding
Bclaf1	ENSMUSG00000037608	7.13091	11.3876	0.674491	7.07924	7.02052	0.00805809	0.108771	protein_coding
Man2a2	ENSMUSG00000038886	7.37895	4.91815	-0.586228	6.04629	7.01999	0.00806048	0.108771	protein_coding
Spink2	ENSMUSG00000053030	0.378999	1.17433	1.60084	-0.657634	7.01786	0.00807007	0.108771	protein_coding
1110008F13Rik	ENSMUSG00000027637	22.453	33.28	0.567869	6.26673	7.01407	0.00808718	0.108902	protein_coding
Eif2s1	ENSMUSG00000021116	17.3964	28.0829	0.689364	6.20647	7.00191	0.00814228	0.109475	protein_coding
Gm8741	ENSMUSG00000091655	12.0555	42.6596	1.82373	3.22702	7.00053	0.00814857	0.109475	processed_pseudogene
Dgat1	ENSMUSG00000022555	10.3999	18.5372	0.835812	5.38685	6.99982	0.0081518	0.109475	protein_coding
Rpph1	ENSMUSG00000092837	0.949178	2.97111	1.58243	-0.617964	6.99576	0.00817031	0.109605	ribozyme
Zfp521	ENSMUSG00000024420	7.13241	4.71347	-0.59515	5.24975	6.99448	0.00817614	0.109605	protein_coding
Tubb2b	ENSMUSG00000045136	48.7565	89.0344	0.868269	6.96242	6.99084	0.00819281	0.109729	protein_coding
Gatsl2	ENSMUSG00000015944	5.00682	2.89427	-0.786087	4.9817	6.9821	0.00823291	0.110167	protein_coding
Vsir	ENSMUSG00000020101	5.7827	3.22872	-0.833857	4.58538	6.97537	0.00826391	0.110383	protein_coding
Fblim1	ENSMUSG00000006219	20.7987	14.1969	-0.550166	6.34076	6.96839	0.0082962	0.110616	protein_coding
Pole2	ENSMUSG00000020974	2.18027	4.40119	1.00212	2.39231	6.96639	0.00830549	0.110641	protein_coding
Haus1	ENSMUSG00000041840	16.846	27.976	0.728005	4.42285	6.95609	0.00835343	0.110954	protein_coding
Nop10	ENSMUSG00000027133	41.0855	67.5253	0.71539	5.8418	6.95501	0.00835848	0.110954	protein_coding
Piga	ENSMUSG00000031381	0.454794	1.01052	1.1406	2.12392	6.95357	0.0083652	0.110954	protein_coding
Mfsd12	ENSMUSG00000034854	8.08169	4.73054	-0.766244	4.74993	6.95335	0.00836627	0.110954	protein_coding
Zfp395	ENSMUSG00000034522	13.4241	8.53388	-0.650836	5.60379	6.94102	0.00842409	0.111393	protein_coding
Itga3	ENSMUSG00000001507	5.17675	3.38094	-0.61308	4.67692	6.94058	0.00842618	0.111393	protein_coding
Smco1	ENSMUSG00000046345	1.42501	0.579189	-1.28121	0.714842	6.94036	0.0084272	0.111393	protein_coding
Trmt10c	ENSMUSG00000044763	6.5281	10	0.613714	4.57642	6.93832	0.00843685	0.111393	protein_coding
5530601H04Rik	ENSMUSG00000087174	0.735139	1.26912	0.783148	3.10826	6.9306	0.00847335	0.111776	processed_transcript
Pcdh17	ENSMUSG00000035566	2.14653	1.08233	-0.989419	4.04114	6.92272	0.00851073	0.11217	protein_coding
Tnrc18	ENSMUSG00000039477	10.5096	6.46665	-0.699033	6.77097	6.91879	0.00852947	0.112317	protein_coding
Igdcc4	ENSMUSG00000032816	1.69001	1.03582	-0.707777	3.77136	6.91571	0.00854416	0.112411	protein_coding
Cuedc1	ENSMUSG00000018378	8.77579	5.59132	-0.647035	5.44235	6.91383	0.00855315	0.11243	protein_coding
Ylpm1	ENSMUSG00000021244	4.16926	2.77953	-0.584697	5.16757	6.9121	0.00856145	0.11244	protein_coding
Nup107	ENSMUSG00000052798	6.26763	10.4865	0.739091	4.6325	6.90762	0.00858294	0.112564	protein_coding
Echdc1	ENSMUSG00000019883	4.74018	7.38883	0.637858	4.58528	6.90697	0.00858602	0.112564	protein_coding
Plxna1	ENSMUSG00000030084	6.81728	4.20972	-0.692831	5.71163	6.90023	0.00861848	0.11289	protein_coding
Adgrd1	ENSMUSG00000044017	0.591473	1.15323	0.968166	2.79116	6.89642	0.00863684	0.112961	protein_coding
Chek1	ENSMUSG00000032113	1.17229	2.50632	1.08875	2.98728	6.89448	0.00864625	0.112961	protein_coding
Dynlt1f	ENSMUSG00000095677	22.1879	35.4657	0.673482	4.47662	6.89439	0.00864665	0.112961	protein_coding
Snrpd3	ENSMUSG00000020180	13.0741	19.5713	0.580665	5.75223	6.8901	0.00866744	0.113118	protein_coding
Hic1	ENSMUSG00000043099	12.7224	7.10057	-0.836907	5.30053	6.88877	0.00867392	0.113118	protein_coding
St6galnac6	ENSMUSG00000026811	16.7386	11.4145	-0.552481	6.13875	6.8817	0.00870825	0.113466	protein_coding
Mtss1	ENSMUSG00000022353	19.7993	13.5377	-0.548933	6.42596	6.86332	0.00879828	0.114539	protein_coding
Ptbp2	ENSMUSG00000028134	3.1781	5.35607	0.75013	5.21748	6.85879	0.00882065	0.11473	protein_coding
Evi5l	ENSMUSG00000011832	3.30337	2.10994	-0.64261	4.5977	6.85647	0.00883207	0.114741	protein_coding
Emilin2	ENSMUSG00000024053	47.8022	30.8827	-0.629365	7.32709	6.85394	0.00884461	0.114741	protein_coding
Fbxo32	ENSMUSG00000022358	9.07307	5.93785	-0.61415	5.76391	6.84717	0.00887818	0.115003	protein_coding
Tmem131	ENSMUSG00000026116	6.51942	4.24025	-0.618031	5.72562	6.84447	0.00889161	0.115003	protein_coding
Rad21	ENSMUSG00000022314	49.2344	78.0369	0.664092	7.77492	6.84073	0.00891026	0.115003	protein_coding
Dennd4b	ENSMUSG00000042404	5.73868	3.70304	-0.629055	4.8982	6.83904	0.00891866	0.115003	protein_coding
Sec61b	ENSMUSG00000053317	18.2726	31.4656	0.786793	4.91023	6.8384	0.00892185	0.115003	protein_coding
Ankrd13b	ENSMUSG00000037907	7.78888	4.91312	-0.659667	4.67901	6.83667	0.00893051	0.115003	protein_coding
Ptpn3	ENSMUSG00000038764	2.41713	1.308	-0.876273	3.85083	6.83553	0.00893621	0.115003	protein_coding
N4bp2l2	ENSMUSG00000029655	1.7975	2.90792	0.691286	5.29374	6.83354	0.0089462	0.115003	protein_coding
Smc1a	ENSMUSG00000041133	14.6104	24.105	0.721337	6.73141	6.83242	0.00895178	0.115003	protein_coding
Kazald1	ENSMUSG00000025213	3.11722	1.56979	-0.9826	2.1138	6.83232	0.0089523	0.115003	protein_coding
Nhp2	ENSMUSG00000001056	23.2718	36.9171	0.663551	5.04441	6.83028	0.00896253	0.115003	protein_coding
Col15a1	ENSMUSG00000028339	25.2787	15.2417	-0.728481	7.07833	6.82901	0.00896891	0.115003	protein_coding
Ubl7	ENSMUSG00000055720	32.4383	21.2324	-0.609124	6.0721	6.82877	0.00897012	0.115003	protein_coding
Pfkp	ENSMUSG00000021196	10.1411	16.5176	0.702992	6.89834	6.82672	0.00898041	0.115003	protein_coding
Irf6	ENSMUSG00000026638	0.738772	1.58987	1.11163	2.96049	6.82658	0.0089811	0.115003	protein_coding
AW549877	ENSMUSG00000041935	5.7305	9.96954	0.796033	5.24006	6.82366	0.00899583	0.115003	protein_coding
Ldoc1l	ENSMUSG00000055745	3.97285	2.35643	-0.744939	3.89276	6.82358	0.00899619	0.115003	protein_coding
Nupr1	ENSMUSG00000030717	0.874755	8.31138	3.24416	3.3101	6.82069	0.00901076	0.11509	protein_coding
Zranb2	ENSMUSG00000028180	6.43268	11.0279	0.775755	5.80624	6.80201	0.00910555	0.116002	protein_coding
Gpr155	ENSMUSG00000041762	1.47345	3.08396	1.07014	3.83783	6.79703	0.00913098	0.116227	protein_coding
Prdm2	ENSMUSG00000057637	7.19265	4.73852	-0.599888	5.53004	6.78054	0.00921568	0.117104	protein_coding
Gins1	ENSMUSG00000027454	3.3472	6.90652	1.03645	2.86173	6.76237	0.00930998	0.118164	protein_coding
Maml1	ENSMUSG00000050567	5.60162	3.44584	-0.698107	4.71821	6.76051	0.00931972	0.118164	protein_coding
Klc4	ENSMUSG00000003546	21.2636	14.3106	-0.57111	5.4275	6.75991	0.00932287	0.118164	protein_coding
Tpst1	ENSMUSG00000034118	10.2259	6.48828	-0.651489	4.61338	6.75695	0.00933833	0.118259	protein_coding
Phlpp1	ENSMUSG00000044340	5.52478	3.5888	-0.619104	5.00892	6.7519	0.00936479	0.118398	protein_coding
Mafb	ENSMUSG00000074622	4.02786	1.94944	-1.03387	3.44574	6.75182	0.0093652	0.118398	protein_coding
Decr1	ENSMUSG00000028223	69.3309	43.4472	-0.674215	7.8386	6.74977	0.00937596	0.118433	protein_coding
Fam109a	ENSMUSG00000044134	12.5642	7.59989	-0.718962	4.68106	6.74771	0.00938683	0.11847	protein_coding
Ccdc97	ENSMUSG00000002608	13.3326	8.80699	-0.595435	5.50819	6.74147	0.0094197	0.118784	protein_coding
Mtx3	ENSMUSG00000021704	1.68555	3.1852	0.912345	3.84742	6.73575	0.00944993	0.118924	protein_coding
Ets2	ENSMUSG00000022895	30.2414	19.022	-0.667502	6.92398	6.73515	0.00945314	0.118924	protein_coding
Ccnf	ENSMUSG00000072082	3.30487	6.05814	0.879833	3.78454	6.73484	0.00945479	0.118924	protein_coding
Adora2a	ENSMUSG00000020178	7.98782	4.30474	-0.882952	4.0565	6.7269	0.00949697	0.119354	protein_coding
Paqr7	ENSMUSG00000037348	4.05469	2.51908	-0.682529	3.88503	6.72237	0.00952112	0.119456	protein_coding
Nfya	ENSMUSG00000023994	6.09147	3.98553	-0.6099	5.26763	6.71144	0.00957964	0.119844	protein_coding
Btbd2	ENSMUSG00000003344	21.1491	13.7747	-0.616115	6.03111	6.71107	0.00958162	0.119844	protein_coding
Trim59	ENSMUSG00000034317	5.04446	7.78795	0.626395	4.36973	6.71057	0.00958429	0.119844	protein_coding
Adgrl1	ENSMUSG00000013033	6.25737	4.20702	-0.571206	5.54881	6.70422	0.00961851	0.120171	protein_coding
Sgsh	ENSMUSG00000005043	2.92822	1.67868	-0.79245	3.44006	6.69883	0.00964762	0.120375	protein_coding
Znfx1	ENSMUSG00000039501	4.08016	2.40437	-0.757842	4.81026	6.69757	0.00965442	0.120375	protein_coding
Aldh1l1	ENSMUSG00000030088	0.760698	1.43666	0.926508	2.25617	6.6967	0.00965916	0.120375	protein_coding
Npas2	ENSMUSG00000026077	3.53933	2.11291	-0.738162	3.84365	6.69293	0.00967962	0.12053	protein_coding
Kcnj12	ENSMUSG00000042529	9.4579	6.06831	-0.644585	4.4847	6.68912	0.00970029	0.120548	protein_coding
Tox	ENSMUSG00000041272	1.14567	0.624432	-0.871412	2.85991	6.68706	0.00971153	0.120548	protein_coding
B4galt5	ENSMUSG00000017929	7.61498	4.7758	-0.669147	4.80932	6.68673	0.00971331	0.120548	protein_coding
Serp1	ENSMUSG00000027808	16.4773	28.5484	0.793915	6.62033	6.6867	0.0097135	0.120548	protein_coding
Rad51ap1	ENSMUSG00000030346	1.30273	2.35599	0.847192	3.06369	6.68375	0.00972955	0.120646	protein_coding
Tceal7	ENSMUSG00000079428	6.60147	12.9368	0.96544	3.47957	6.68088	0.00974524	0.120647	protein_coding
Zfp523	ENSMUSG00000024220	12.8864	8.15554	-0.656201	5.45973	6.67251	0.0097911	0.121078	protein_coding
Tspan6	ENSMUSG00000067377	18.739	29.7916	0.666624	5.57798	6.67146	0.00979691	0.121078	protein_coding
2810474O19Rik	ENSMUSG00000032712	1.4608	2.58935	0.820773	4.2069	6.66884	0.00981133	0.121083	protein_coding
Map7d3	ENSMUSG00000067878	1.21134	2.59073	1.08871	2.37445	6.66576	0.00982826	0.121083	protein_coding
Igf1r	ENSMUSG00000005533	4.21348	2.80216	-0.590021	5.93962	6.66225	0.00984763	0.121083	protein_coding
C130074G19Rik	ENSMUSG00000039349	13.9038	8.43979	-0.716107	5.15758	6.6611	0.00985403	0.121083	protein_coding
Sema5a	ENSMUSG00000022231	3.08338	1.95718	-0.656321	4.83692	6.65743	0.0098743	0.121083	protein_coding
Ankrd50	ENSMUSG00000044864	9.94701	6.85301	-0.537808	6.21054	6.65708	0.00987624	0.121083	protein_coding
Ogt	ENSMUSG00000034160	9.67443	18.2822	0.917304	6.72207	6.65681	0.00987775	0.121083	protein_coding
Zfp72	ENSMUSG00000069184	0.860578	1.97089	1.17271	1.13133	6.65533	0.00988596	0.121083	protein_coding
Nmral1	ENSMUSG00000063445	2.26949	3.87748	0.769643	3.51225	6.65524	0.00988649	0.121083	protein_coding
Dek	ENSMUSG00000021377	21.1604	32.0792	0.599104	6.30257	6.65439	0.00989118	0.121083	protein_coding
Plpp5	ENSMUSG00000031570	5.50643	8.30257	0.593791	4.55311	6.65225	0.00990307	0.121083	protein_coding
Pcna-ps2	ENSMUSG00000067608	1.40242	6.55387	2.21783	2.15869	6.64952	0.00991826	0.121083	protein_coding
Ccne2	ENSMUSG00000028212	1.91061	3.71211	0.951362	3.20683	6.64882	0.00992213	0.121083	protein_coding
Acot9	ENSMUSG00000025287	15.3108	24.1738	0.657189	5.424	6.64854	0.00992374	0.121083	protein_coding
Slc1a5	ENSMUSG00000001918	7.17445	11.1385	0.637102	5.19669	6.64717	0.00993136	0.121083	protein_coding
Neo1	ENSMUSG00000032340	13.8362	9.5631	-0.532713	6.7254	6.64503	0.0099433	0.121083	protein_coding
Dgat2	ENSMUSG00000030747	35.4048	19.874	-0.830844	6.49419	6.64494	0.00994377	0.121083	protein_coding
Tbc1d8b	ENSMUSG00000042473	1.48031	2.95071	0.988096	3.43499	6.64337	0.00995257	0.121091	protein_coding
Rab11fip5	ENSMUSG00000051343	26.088	17.3828	-0.584766	7.11443	6.63657	0.00999059	0.121454	protein_coding
Lrrc4b	ENSMUSG00000047085	30.3744	17.1688	-0.82038	6.20242	6.63126	0.0100204	0.121705	protein_coding
Gm28438	ENSMUSG00000101939	22.8058	38.3068	0.752942	3.33967	6.63	0.0100276	0.121705	unprocessed_pseudogene
Polg	ENSMUSG00000039176	5.46485	3.7446	-0.546254	5.68433	6.62581	0.0100511	0.121892	protein_coding
Mtss1l	ENSMUSG00000033763	14.7046	8.9015	-0.721359	6.0423	6.62418	0.0100603	0.121904	protein_coding
Ywhaq	ENSMUSG00000076432	33.2657	49.265	0.565871	6.92472	6.61416	0.0101171	0.122178	protein_coding
Arvcf	ENSMUSG00000000325	12.6637	8.76654	-0.530018	6.1592	6.61331	0.0101219	0.122178	protein_coding
Nmrk2	ENSMUSG00000004939	3.9599	11.0231	1.47449	3.63997	6.61207	0.010129	0.122178	protein_coding
Psrc1	ENSMUSG00000068744	1.68039	2.86495	0.767876	2.87431	6.60886	0.0101473	0.122192	protein_coding
Cenpu	ENSMUSG00000031629	0.812685	1.59883	0.966698	2.19399	6.60841	0.0101498	0.122192	protein_coding
Psmb7	ENSMUSG00000026750	47.2361	72.0443	0.608591	7.61187	6.59832	0.0102075	0.122688	protein_coding
Cebpb	ENSMUSG00000056501	12.481	25.0063	1.00434	4.72596	6.59668	0.0102169	0.122702	protein_coding
Nr3c2	ENSMUSG00000031618	1.7851	1.03462	-0.794403	3.28086	6.59484	0.0102275	0.12273	protein_coding
Tipin	ENSMUSG00000032397	9.12937	15.2488	0.737238	4.43951	6.57593	0.0103367	0.123941	protein_coding
Pcdh12	ENSMUSG00000024440	5.54192	3.31108	-0.738746	4.82168	6.56689	0.0103893	0.124408	protein_coding
Proser1	ENSMUSG00000049504	3.14325	1.80447	-0.792605	4.00634	6.56511	0.0103997	0.124408	protein_coding
Neto2	ENSMUSG00000036902	0.601982	1.17671	0.955349	2.36515	6.56384	0.0104072	0.124408	protein_coding
mt-Tp	ENSMUSG00000064372	6.30054	22.3244	1.76731	-0.145822	6.56254	0.0104148	0.124408	Mt_tRNA
Tom1l2	ENSMUSG00000000538	12.0943	8.31998	-0.53895	6.53734	6.56207	0.0104175	0.124408	protein_coding
Dsp	ENSMUSG00000054889	76.2173	51.4368	-0.567329	9.3181	6.55716	0.0104463	0.124546	protein_coding
Lrp1	ENSMUSG00000040249	4.04041	2.47378	-0.70494	5.92177	6.55285	0.0104716	0.124546	protein_coding
Fitm1	ENSMUSG00000022215	116.544	75.9653	-0.618203	6.60466	6.55214	0.0104758	0.124546	protein_coding
Tsc2	ENSMUSG00000002496	16.6074	11.0117	-0.591085	6.43635	6.55064	0.0104847	0.124546	protein_coding
Auts2	ENSMUSG00000029673	1.15273	0.730922	-0.653864	4.50138	6.55013	0.0104876	0.124546	protein_coding
Kifc1	ENSMUSG00000079553	5.83478	9.65443	0.728867	4.65446	6.54752	0.010503	0.124629	protein_coding
Jak3	ENSMUSG00000031805	3.42642	2.02167	-0.752435	3.95122	6.54389	0.0105245	0.124772	protein_coding
Bag3	ENSMUSG00000030847	45.8323	29.9504	-0.612232	6.66218	6.54266	0.0105318	0.124772	protein_coding
Fgfbp3	ENSMUSG00000047632	3.25299	1.79229	-0.86123	2.2767	6.53803	0.0105592	0.124997	protein_coding
Aifm1	ENSMUSG00000036932	22.916	33.5207	0.548317	6.76669	6.53292	0.0105896	0.125257	protein_coding
Mpc1	ENSMUSG00000023861	41.4065	64.1901	0.63171	6.71759	6.52425	0.0106414	0.125671	protein_coding
Cct8	ENSMUSG00000025613	55.6216	85.622	0.621839	7.70655	6.52187	0.0106556	0.125671	protein_coding
Igfbp6	ENSMUSG00000023046	4.70393	13.631	1.53189	3.21887	6.51948	0.0106699	0.125671	protein_coding
Sema6c	ENSMUSG00000038777	2.1128	1.11181	-0.912461	3.36533	6.51716	0.0106839	0.125671	protein_coding
Kcnj5	ENSMUSG00000032034	25.9602	17.0447	-0.607602	6.71471	6.51666	0.0106869	0.125671	protein_coding
Tmpo	ENSMUSG00000019961	14.5091	22.2227	0.614612	7.59671	6.5151	0.0106962	0.125671	protein_coding
Cln6	ENSMUSG00000032245	11.6795	7.05416	-0.720786	4.5884	6.51411	0.0107022	0.125671	protein_coding
Ifit2	ENSMUSG00000045932	2.97521	5.96276	0.998032	4.03523	6.50867	0.010735	0.125876	protein_coding
Ltbp1	ENSMUSG00000001870	6.94391	4.74594	-0.548598	5.99273	6.5038	0.0107644	0.125961	protein_coding
Gm13532	ENSMUSG00000081642	3.87308	0.683761	-2.57063	-0.475849	6.50188	0.0107761	0.125961	processed_pseudogene
Hmgn3	ENSMUSG00000066456	12.6923	19.5448	0.620965	4.85406	6.49444	0.0108212	0.126322	protein_coding
Snn	ENSMUSG00000037972	32.5612	22.4698	-0.534851	6.37327	6.49399	0.010824	0.126322	protein_coding
Rps24	ENSMUSG00000025290	741.349	1162.51	0.64893	9.57804	6.48421	0.0108837	0.12692	protein_coding
Rpl22l1	ENSMUSG00000039221	24.8674	39.5226	0.666835	5.9353	6.4767	0.0109298	0.127357	protein_coding
Ptcd3	ENSMUSG00000063884	11.3397	18.2421	0.684851	6.59274	6.47412	0.0109457	0.127443	protein_coding
Hmgb1	ENSMUSG00000066551	45.3909	69.4651	0.613528	8.11079	6.46827	0.0109817	0.127762	protein_coding
Gtse1	ENSMUSG00000022385	3.57876	6.76316	0.923539	3.73611	6.46369	0.0110101	0.127892	protein_coding
Apbb1	ENSMUSG00000037032	21.0682	14.368	-0.551447	6.34303	6.46168	0.0110225	0.127897	protein_coding
Oprd1	ENSMUSG00000050511	1.30271	0.607338	-1.11805	2.0828	6.46085	0.0110277	0.127897	protein_coding
Flcn	ENSMUSG00000032633	17.3886	11.8227	-0.555171	6.03689	6.45876	0.0110407	0.127948	protein_coding
Ska2	ENSMUSG00000020492	7.96133	12.1596	0.608287	4.98282	6.45599	0.0110579	0.12802	protein_coding
Palld	ENSMUSG00000058056	42.3952	28.6144	-0.566995	8.56878	6.45499	0.0110641	0.12802	protein_coding
Gpr27	ENSMUSG00000072875	2.13244	1.10503	-0.941001	2.08347	6.45349	0.0110735	0.128029	protein_coding
Cmc2	ENSMUSG00000014633	14.6105	24.3398	0.734071	5.24224	6.45122	0.0110876	0.128093	protein_coding
Tpm4	ENSMUSG00000031799	104.213	160.155	0.619632	8.12381	6.44913	0.0111007	0.128144	protein_coding
Itsn1	ENSMUSG00000022957	2.37491	1.59809	-0.569906	5.5437	6.44718	0.0111129	0.128186	protein_coding
Ehmt2	ENSMUSG00000013787	19.3318	13.0376	-0.566904	6.53015	6.43791	0.011171	0.128757	protein_coding
Nnmt	ENSMUSG00000032271	2.81589	5.15937	0.876612	2.58938	6.43129	0.0112127	0.128973	protein_coding
Eme1	ENSMUSG00000039055	1.0575	1.96051	0.886467	2.00099	6.43104	0.0112143	0.128973	protein_coding
Klf13	ENSMUSG00000052040	9.05137	6.26154	-0.531313	5.90394	6.4308	0.0112158	0.128973	protein_coding
Zcchc14	ENSMUSG00000061410	6.44918	4.12825	-0.640722	5.42895	6.42677	0.0112413	0.129166	protein_coding
Crip2	ENSMUSG00000006356	705.818	451.746	-0.643683	10.3087	6.42313	0.0112644	0.129307	protein_coding
Dedd2	ENSMUSG00000054499	3.63178	2.2361	-0.693505	4.21001	6.4173	0.0113014	0.129557	protein_coding
Gm17501	ENSMUSG00000097183	1.32248	2.80859	1.07512	2.0444	6.41345	0.0113259	0.129738	lincRNA
Gm5822	ENSMUSG00000089993	1.02036	0.258649	-1.95014	0.116028	6.41168	0.0113372	0.129762	processed_pseudogene
Arhgef17	ENSMUSG00000032875	7.10154	4.40309	-0.68779	6.02526	6.41038	0.0113455	0.129762	protein_coding
Zkscan17	ENSMUSG00000020472	11.0204	6.87668	-0.676219	5.42471	6.40657	0.0113699	0.129941	protein_coding
Grk5	ENSMUSG00000003228	8.98427	5.70832	-0.651845	4.60969	6.39728	0.0114296	0.130482	protein_coding
Klhl21	ENSMUSG00000073700	15.2954	9.89935	-0.624965	5.71407	6.39549	0.0114411	0.130482	protein_coding
Anapc15	ENSMUSG00000030649	2.85356	4.57921	0.6808	4.19915	6.39512	0.0114435	0.130482	protein_coding
Acsl4	ENSMUSG00000031278	5.0093	8.19004	0.706178	5.08767	6.38943	0.0114802	0.1308	protein_coding
Lcorl	ENSMUSG00000015882	0.555774	1.00778	0.852658	3.80082	6.3865	0.0114992	0.130916	protein_coding
Cenpa	ENSMUSG00000029177	9.70396	15.3534	0.662357	6.13328	6.38151	0.0115315	0.131185	protein_coding
Uba3	ENSMUSG00000030061	12.438	19.5056	0.647963	6.6039	6.37881	0.0115491	0.131284	protein_coding
Eef2k	ENSMUSG00000035064	7.9501	5.48602	-0.534433	5.69244	6.37444	0.0115775	0.131506	protein_coding
Uevld	ENSMUSG00000043262	1.19248	1.98631	0.730508	3.51931	6.3731	0.0115863	0.131506	protein_coding
Abracl	ENSMUSG00000078453	87.6338	130.403	0.572299	6.40262	6.36953	0.0116096	0.131573	protein_coding
Kremen1	ENSMUSG00000020393	15.6157	10.1754	-0.616471	6.69918	6.36949	0.0116099	0.131573	protein_coding
Dot1l	ENSMUSG00000061589	12.6124	8.74651	-0.527721	6.59164	6.36773	0.0116214	0.131603	protein_coding
Dnajc8	ENSMUSG00000054405	29.2332	44.3448	0.599999	6.49514	6.36433	0.0116437	0.131655	protein_coding
Rnpepl1	ENSMUSG00000026269	11.3435	7.30117	-0.633778	6.52692	6.35156	0.0117278	0.132234	protein_coding
Srgap1	ENSMUSG00000020121	1.90306	1.11794	-0.760343	3.8717	6.35078	0.0117329	0.132234	protein_coding
Osbp2	ENSMUSG00000020435	2.36256	1.31714	-0.84491	3.64352	6.34871	0.0117467	0.132234	protein_coding
Gpt2	ENSMUSG00000031700	2.69792	1.66155	-0.693527	3.70179	6.34867	0.0117469	0.132234	protein_coding
Dysf	ENSMUSG00000033788	7.68115	4.72619	-0.698165	5.76147	6.34714	0.0117571	0.132234	protein_coding
Ccne1	ENSMUSG00000002068	2.75235	4.65139	0.755056	3.23668	6.34292	0.011785	0.132302	protein_coding
Ttc14	ENSMUSG00000027677	1.46612	3.74216	1.3496	4.64504	6.3424	0.0117885	0.132302	protein_coding
Psma3	ENSMUSG00000060073	33.0103	49.0305	0.570267	7.26279	6.34089	0.0117986	0.132302	protein_coding
Tubb2a	ENSMUSG00000058672	37.8699	61.2171	0.692105	6.22566	6.33806	0.0118174	0.132302	protein_coding
Phf11d	ENSMUSG00000068245	0.998726	1.8976	0.929212	2.64042	6.33787	0.0118187	0.132302	protein_coding
Sarnp	ENSMUSG00000078427	42.2208	66.1964	0.646777	5.78363	6.33631	0.0118291	0.132302	protein_coding
Dynlrb1	ENSMUSG00000047459	148.586	226.152	0.605535	7.5023	6.33557	0.011834	0.132302	protein_coding
Hs1bp3	ENSMUSG00000020605	7.20827	4.33806	-0.724739	4.17477	6.33321	0.0118497	0.132302	protein_coding
Tmx2	ENSMUSG00000050043	24.2984	37.8973	0.640106	6.11585	6.33239	0.0118552	0.132302	protein_coding
Snrnp25	ENSMUSG00000040767	7.94874	13.8679	0.798742	3.43277	6.33211	0.0118571	0.132302	protein_coding
Golm1	ENSMUSG00000021556	9.30317	14.3671	0.62454	5.38897	6.33153	0.011861	0.132302	protein_coding
Cbr2	ENSMUSG00000025150	0.846576	2.7694	1.71566	1.21293	6.32934	0.0118756	0.132364	protein_coding
Ndufaf4	ENSMUSG00000028261	14.4633	21.1835	0.549532	6.06624	6.32781	0.0118859	0.132364	protein_coding
Arl6	ENSMUSG00000022722	4.12595	6.96378	0.748747	3.47285	6.32673	0.0118931	0.132364	protein_coding
Zfp467	ENSMUSG00000068551	6.45451	4.04947	-0.667325	4.55485	6.31651	0.0119619	0.132954	protein_coding
Sapcd2	ENSMUSG00000026955	1.34352	2.65466	0.988068	2.73075	6.31427	0.011977	0.132954	protein_coding
Hip1	ENSMUSG00000039959	4.72908	3.17234	-0.575749	5.73708	6.31204	0.0119921	0.132954	protein_coding
Frem2	ENSMUSG00000037016	1.41762	0.790243	-0.851776	3.95971	6.31099	0.0119992	0.132954	protein_coding
Lingo1	ENSMUSG00000049556	1.20563	0.609958	-0.973547	2.23103	6.3109	0.0119998	0.132954	protein_coding
Bcorl1	ENSMUSG00000036959	2.33287	1.31545	-0.819531	4.0472	6.30699	0.0120263	0.133126	protein_coding
Kank2	ENSMUSG00000032194	20.3857	13.6732	-0.574686	6.53592	6.30597	0.0120332	0.133126	protein_coding
Rplp1	ENSMUSG00000007892	1752.58	2630.38	0.585768	10.036	6.2968	0.0120956	0.133519	protein_coding
BC043934	ENSMUSG00000056418	6.29607	3.73206	-0.744694	3.64944	6.29447	0.0121115	0.133595	lincRNA
Gm7694	ENSMUSG00000102752	2.65903	1.4739	-0.837026	3.08727	6.2931	0.0121209	0.133599	protein_coding
Crls1	ENSMUSG00000027357	11.7899	17.8931	0.602653	4.89429	6.2894	0.0121462	0.133681	protein_coding
Csrp3	ENSMUSG00000030470	245.748	412.952	0.748681	9.70577	6.28767	0.0121581	0.133712	protein_coding
Rpp30	ENSMUSG00000024800	7.83029	13.5363	0.78414	3.55418	6.28282	0.0121914	0.133979	protein_coding
Dhrs7b	ENSMUSG00000042569	5.00182	7.84402	0.649346	4.3575	6.28037	0.0122082	0.133993	protein_coding
Mcm7	ENSMUSG00000029730	12.6229	18.9827	0.587836	6.07044	6.27872	0.0122196	0.133993	protein_coding
Fbxl8	ENSMUSG00000033313	2.15922	1.02516	-1.04541	1.89285	6.2758	0.0122398	0.134115	protein_coding
Gtf3c1	ENSMUSG00000032777	12.8964	8.75706	-0.557664	7.07907	6.27175	0.0122678	0.13419	protein_coding
Mmp14	ENSMUSG00000000957	36.7678	22.3991	-0.713641	7.06069	6.27145	0.0122699	0.13419	protein_coding
Tspo	ENSMUSG00000041736	49.8166	71.1109	0.513049	5.94011	6.27004	0.0122796	0.13419	protein_coding
Tcof1	ENSMUSG00000024613	7.10272	4.4729	-0.662301	4.99968	6.26959	0.0122827	0.13419	protein_coding
Smpd2	ENSMUSG00000019822	11.5865	7.51123	-0.621706	5.47956	6.2619	0.0123362	0.134675	protein_coding
Dcaf8	ENSMUSG00000026554	18.9533	13.208	-0.520984	7.75867	6.25954	0.0123526	0.134756	protein_coding
Tubb6	ENSMUSG00000001473	40.7613	64.0089	0.65119	6.46007	6.25648	0.012374	0.13489	protein_coding
Synpo	ENSMUSG00000043079	7.19517	4.58126	-0.648369	5.87664	6.25229	0.0124033	0.135036	protein_coding
Cct6a	ENSMUSG00000029447	39.5826	59.7644	0.593956	7.43113	6.25008	0.0124188	0.135081	processed_transcript
Mir133a-1hg	ENSMUSG00000095438	8.06408	14.6824	0.859911	2.11235	6.24864	0.0124289	0.135092	antisense_RNA
Cmpk1	ENSMUSG00000028719	15.6909	22.5021	0.520875	5.97932	6.24187	0.0124765	0.135412	protein_coding
Mcts1	ENSMUSG00000000355	10.4025	17.1579	0.717503	4.36838	6.23845	0.0125006	0.135575	protein_coding
Prrx2	ENSMUSG00000039476	1.9845	3.9399	0.979851	2.46029	6.23535	0.0125225	0.135714	protein_coding
Dnajc10	ENSMUSG00000027006	14.1507	20.3828	0.525657	6.38146	6.23279	0.0125406	0.135811	protein_coding
Ndufv3	ENSMUSG00000024038	87.4975	132.119	0.594372	8.03557	6.2287	0.0125696	0.135994	protein_coding
Lsr	ENSMUSG00000001247	1.57188	3.85793	1.30004	2.47721	6.22782	0.0125758	0.135994	protein_coding
Tmem201	ENSMUSG00000044700	12.0032	8.0867	-0.568475	6.5464	6.22354	0.0126063	0.136169	protein_coding
Xkr5	ENSMUSG00000039814	0.887447	1.82618	1.04617	2.41432	6.22298	0.0126103	0.136169	protein_coding
Acad12	ENSMUSG00000042647	4.4477	2.61686	-0.768888	4.6046	6.21951	0.012635	0.136316	protein_coding
Banf1	ENSMUSG00000024844	123.041	184.94	0.587419	6.92205	6.2185	0.0126422	0.136316	protein_coding
Mydgf	ENSMUSG00000019579	20.2885	29.751	0.551351	5.74347	6.21239	0.0126859	0.136688	protein_coding
Angptl2	ENSMUSG00000004105	27.9764	19.1575	-0.545641	7.26498	6.20341	0.0127504	0.137245	protein_coding
Dusp26	ENSMUSG00000039661	1.59033	0.727038	-1.12302	1.58488	6.20263	0.012756	0.137245	protein_coding
Xaf1	ENSMUSG00000040483	1.14721	1.99047	0.790958	2.81673	6.1954	0.0128083	0.137558	protein_coding
Mkl2	ENSMUSG00000009569	3.6525	2.26338	-0.687299	4.80542	6.19109	0.0128395	0.137558	protein_coding
Gnpnat1	ENSMUSG00000037722	3.39996	5.38602	0.664571	3.47535	6.18986	0.0128484	0.137558	protein_coding
Gpr146	ENSMUSG00000044197	6.22678	4.20829	-0.565277	5.20501	6.1896	0.0128503	0.137558	protein_coding
Plod2	ENSMUSG00000032374	5.15675	9.06916	0.811631	5.18123	6.18839	0.0128591	0.137558	protein_coding
Man1c1	ENSMUSG00000037306	6.22265	4.11352	-0.593479	4.94965	6.18343	0.0128952	0.137845	protein_coding
Acsl5	ENSMUSG00000024981	9.06409	13.4198	0.568082	5.09367	6.17967	0.0129226	0.137961	protein_coding
Hspa4l	ENSMUSG00000025757	2.93243	4.96303	0.756666	5.46601	6.1794	0.0129246	0.137961	protein_coding
Pdlim1	ENSMUSG00000055044	15.7027	23.6565	0.590444	6.63515	6.17579	0.012951	0.138064	protein_coding
Uba6	ENSMUSG00000035898	1.22613	2.1278	0.789423	3.70042	6.17554	0.0129528	0.138064	protein_coding
Hadha	ENSMUSG00000025745	212.692	135.477	-0.650731	10.6323	6.17133	0.0129837	0.138294	protein_coding
Arrb1	ENSMUSG00000018909	4.31163	2.87393	-0.582853	5.38814	6.16366	0.0130401	0.138661	protein_coding
Gtf2h2	ENSMUSG00000021639	3.86411	6.00964	0.63371	4.37316	6.16166	0.0130549	0.138661	protein_coding
Zfp319	ENSMUSG00000046556	5.16206	2.9118	-0.820265	4.95253	6.16056	0.013063	0.138661	protein_coding
Wdr35	ENSMUSG00000066643	1.63888	2.8531	0.794168	3.95513	6.16033	0.0130647	0.138661	protein_coding
Sppl2a	ENSMUSG00000027366	5.79003	8.79457	0.601244	5.92245	6.15499	0.0131042	0.138981	protein_coding
Bcas3	ENSMUSG00000059439	5.25598	3.37875	-0.633426	4.78385	6.14781	0.0131575	0.139407	protein_coding
Rps20	ENSMUSG00000028234	86.5285	129.246	0.578705	8.72394	6.14706	0.0131631	0.139407	protein_coding
Bicra	ENSMUSG00000070808	2.49725	1.43621	-0.788356	4.05285	6.14327	0.0131913	0.139606	protein_coding
5730409E04Rik	ENSMUSG00000073755	3.66789	2.19338	-0.739877	3.17356	6.14088	0.0132092	0.139696	protein_coding
Plekhf1	ENSMUSG00000074170	5.0728	3.01992	-0.74133	4.4931	6.13681	0.0132396	0.139919	protein_coding
Rfng	ENSMUSG00000025158	7.74839	4.71947	-0.708826	4.0353	6.13348	0.0132646	0.139984	protein_coding
Lmntd1	ENSMUSG00000054966	3.44472	5.82531	0.757724	5.09529	6.12722	0.0133116	0.14038	protein_coding
Kyat1	ENSMUSG00000039648	20.835	14.3778	-0.534669	5.74061	6.12428	0.0133338	0.140426	protein_coding
Arhgef11	ENSMUSG00000041977	5.40797	3.4098	-0.66157	5.20054	6.12414	0.0133348	0.140426	protein_coding
Fam107a	ENSMUSG00000021750	0.642743	1.26879	0.965722	1.8162	6.11144	0.013431	0.141051	protein_coding
Slc2a8	ENSMUSG00000026791	6.35646	3.7097	-0.768802	4.09844	6.1113	0.013432	0.141051	protein_coding
Plxnc1	ENSMUSG00000074785	2.27121	1.37864	-0.724864	3.91717	6.10836	0.0134544	0.14114	protein_coding
Phf21a	ENSMUSG00000058318	3.89573	2.56182	-0.602453	4.85352	6.10769	0.0134595	0.14114	protein_coding
Galnt12	ENSMUSG00000039774	0.590243	1.87227	1.67412	1.43158	6.104	0.0134876	0.141151	protein_coding
Abca2	ENSMUSG00000026944	4.19332	2.85346	-0.554527	4.93733	6.10341	0.0134922	0.141151	protein_coding
Eif4e	ENSMUSG00000028156	12.9603	20.0813	0.630638	6.57042	6.10263	0.0134981	0.141151	protein_coding
Cyp2s1	ENSMUSG00000040703	0.657977	1.37609	1.06156	2.25767	6.10258	0.0134985	0.141151	protein_coding
Txndc17	ENSMUSG00000020803	38.7612	58.5176	0.593081	5.95117	6.09693	0.0135417	0.141355	protein_coding
Ftsj3	ENSMUSG00000020706	8.27068	11.8495	0.51877	5.40536	6.0968	0.0135427	0.141355	protein_coding
Cops3	ENSMUSG00000019373	24.4428	37.0842	0.600393	6.67183	6.09604	0.0135485	0.141355	protein_coding
Pdgfrb	ENSMUSG00000024620	15.3544	9.16177	-0.74227	6.14327	6.09506	0.0135561	0.141355	protein_coding
Selenof	ENSMUSG00000037072	27.6734	39.8345	0.525354	7.56547	6.09217	0.0135782	0.141388	protein_coding
Rap1gap	ENSMUSG00000041351	2.47906	4.80009	0.956107	4.46366	6.08502	0.0136333	0.141862	protein_coding
Taf1d	ENSMUSG00000031939	2.02329	3.34453	0.722234	4.51855	6.08215	0.0136555	0.141912	protein_coding
Hnrnpul2	ENSMUSG00000071659	24.0401	16.6573	-0.529075	6.91722	6.08192	0.0136572	0.141912	protein_coding
Axin1	ENSMUSG00000024182	12.9477	8.31623	-0.634735	5.41304	6.0807	0.0136667	0.141912	protein_coding
Fabp3	ENSMUSG00000028773	3773.34	2371.65	-0.669997	11.3686	6.0777	0.0136899	0.142054	protein_coding
Gtf3c6	ENSMUSG00000019837	12.0267	18.1822	0.594506	5.34425	6.07308	0.0137258	0.142228	protein_coding
Arid1a	ENSMUSG00000007880	10.0081	6.72704	-0.572042	6.64262	6.06167	0.0138147	0.143	protein_coding
Acadsb	ENSMUSG00000030861	8.87751	13.4507	0.598095	6.26542	6.0604	0.0138246	0.143	protein_coding
Atp1a2	ENSMUSG00000007097	24.9562	16.4739	-0.598721	7.24693	6.05861	0.0138386	0.143	protein_coding
Fhod3	ENSMUSG00000034295	80.4528	55.1771	-0.543839	8.57189	6.05861	0.0138387	0.143	protein_coding
Nos2	ENSMUSG00000020826	1.52506	0.714123	-1.07655	2.43894	6.05593	0.0138596	0.143024	protein_coding
Mgrn1	ENSMUSG00000022517	78.4947	51.1945	-0.615937	7.79863	6.05586	0.0138603	0.143024	protein_coding
Lipt1	ENSMUSG00000037216	3.07411	5.01311	0.704647	2.99807	6.05407	0.0138743	0.14307	protein_coding
Hat1	ENSMUSG00000027018	15.4102	26.6505	0.788423	5.84521	6.05059	0.0139016	0.14322	protein_coding
Bend6	ENSMUSG00000042182	0.944056	1.91016	1.00504	2.20158	6.04976	0.0139082	0.14322	protein_coding
Med13l	ENSMUSG00000018076	1.9709	1.27041	-0.633847	4.71116	6.04658	0.0139333	0.14338	protein_coding
Mir6236	ENSMUSG00000098973	423.214	271.489	-0.637572	5.48287	6.04146	0.0139737	0.143428	miRNA
Gm20900	ENSMUSG00000078180	2.09946	0.395912	-2.32276	-0.400306	6.0412	0.0139758	0.143428	processed_pseudogene
Acsl1	ENSMUSG00000018796	74.2187	48.7348	-0.606639	9.39083	6.03944	0.0139897	0.143428	protein_coding
Lsm3	ENSMUSG00000034192	6.26892	10.3045	0.71363	4.44349	6.03867	0.0139958	0.143428	protein_coding
Susd2	ENSMUSG00000006342	1.22468	2.19845	0.850787	2.42608	6.03312	0.0140399	0.143754	protein_coding
Serpinb6a	ENSMUSG00000060147	17.5676	25.5063	0.537287	6.81098	6.02857	0.0140761	0.143954	protein_coding
Cnep1r1	ENSMUSG00000036810	7.54623	10.9884	0.540952	4.99471	6.0204	0.0141414	0.144522	protein_coding
Zfp362	ENSMUSG00000028799	17.4558	10.3931	-0.743896	5.4852	6.01683	0.01417	0.144524	protein_coding
Zfp820	ENSMUSG00000069743	1.36249	2.55427	0.896937	2.77784	6.01662	0.0141718	0.144524	protein_coding
Coro2b	ENSMUSG00000041729	4.3751	2.67397	-0.704186	4.45915	6.01547	0.014181	0.144524	protein_coding
Akr1b3	ENSMUSG00000001642	10.2814	15.6606	0.60639	6.70469	6.01491	0.0141855	0.144524	protein_coding
Maml3	ENSMUSG00000061143	1.28392	0.779077	-0.72149	3.51884	6.01188	0.0142099	0.144524	protein_coding
Slc12a2	ENSMUSG00000024597	5.40668	7.89705	0.547961	5.38748	6.01027	0.0142228	0.144524	protein_coding
Ndc1	ENSMUSG00000028614	4.28659	7.2501	0.754921	4.75431	6.01024	0.0142231	0.144524	protein_coding
Chchd6	ENSMUSG00000030086	8.13934	12.6652	0.63595	4.65742	6.00973	0.0142272	0.144524	protein_coding
Gm36028	ENSMUSG00000108763	1.84801	5.10442	1.45266	2.11632	6.00911	0.0142322	0.144524	protein_coding
Gm8203	ENSMUSG00000101878	1.55382	3.81472	1.31737	0.0787439	6.00718	0.0142478	0.144524	processed_pseudogene
Ddx3x	ENSMUSG00000000787	40.9462	65.8768	0.685642	8.07009	6.00178	0.0142915	0.144862	protein_coding
Irgm1	ENSMUSG00000046879	2.68074	4.13462	0.621372	4.25032	6.00025	0.0143038	0.144888	protein_coding
Bzw1	ENSMUSG00000051223	42.6694	63.4555	0.572053	7.68432	5.98868	0.014398	0.145545	protein_coding
Plekhm2	ENSMUSG00000028917	19.9151	12.4817	-0.672003	6.4594	5.98206	0.0144521	0.145955	protein_coding
Extl3	ENSMUSG00000021978	22.8105	14.9006	-0.612995	6.87722	5.98132	0.0144582	0.145955	protein_coding
Abca4	ENSMUSG00000028125	3.58986	1.72685	-1.05758	5.10146	5.97005	0.0145509	0.146612	protein_coding
Ltbp3	ENSMUSG00000024940	19.7482	12.803	-0.623533	6.46294	5.96806	0.0145673	0.146612	protein_coding
Gdpd1	ENSMUSG00000061666	10.6544	16.0033	0.588344	4.90699	5.96719	0.0145745	0.146612	protein_coding
Nktr	ENSMUSG00000032525	1.77053	2.79154	0.654644	5.53741	5.96629	0.0145819	0.146612	protein_coding
Nemf	ENSMUSG00000020982	7.66414	13.53	0.81762	5.22153	5.96568	0.0145869	0.146612	protein_coding
1110032F04Rik	ENSMUSG00000046999	2.08028	1.11557	-0.885373	2.16687	5.96457	0.0145962	0.146612	protein_coding
Ctnnbip1	ENSMUSG00000028988	22.1172	14.5049	-0.606043	5.73806	5.96434	0.014598	0.146612	protein_coding
Spcs1	ENSMUSG00000021917	58.8405	85.5607	0.539422	6.74916	5.96385	0.0146021	0.146612	protein_coding
Gstk1	ENSMUSG00000029864	9.02349	14.6893	0.700137	4.0588	5.95879	0.0146441	0.146837	protein_coding
Mpp5	ENSMUSG00000021112	4.61051	7.84176	0.763055	5.026	5.95833	0.0146479	0.146837	protein_coding
Ddx39	ENSMUSG00000005481	7.04046	10.8163	0.618678	5.46439	5.95758	0.0146541	0.146837	protein_coding
Myocd	ENSMUSG00000020542	11.384	7.53156	-0.597348	5.98495	5.95458	0.0146791	0.146963	protein_coding
4930481A15Rik	ENSMUSG00000086938	3.45252	1.67057	-1.03849	2.64988	5.9537	0.0146864	0.146963	antisense_RNA
Aldh1a1	ENSMUSG00000053279	2.10704	4.77988	1.18681	2.74111	5.94662	0.0147455	0.14736	protein_coding
Tmem258	ENSMUSG00000036372	31.5701	46.6215	0.561167	5.92203	5.94658	0.0147459	0.14736	protein_coding
2010111I01Rik	ENSMUSG00000021458	4.0695	5.95538	0.550149	4.94118	5.94434	0.0147646	0.147435	protein_coding
Heyl	ENSMUSG00000032744	7.69552	4.52083	-0.761852	5.04427	5.94331	0.0147732	0.147435	protein_coding
Mall	ENSMUSG00000027377	6.96307	4.27899	-0.702112	3.57583	5.93618	0.0148331	0.147934	protein_coding
Acadl	ENSMUSG00000026003	615.213	414.33	-0.570221	10.0668	5.93062	0.01488	0.148246	protein_coding
Txnip	ENSMUSG00000038393	416.342	269.264	-0.628761	10.1249	5.9301	0.0148844	0.148246	protein_coding
Gm12337	ENSMUSG00000084224	2.54296	0.569344	-2.0625	-0.307479	5.92696	0.014911	0.148313	processed_pseudogene
Hnrnph1	ENSMUSG00000007850	22.5464	34.8018	0.625576	7.32569	5.92695	0.014911	0.148313	protein_coding
Phactr2	ENSMUSG00000062866	13.913	9.43933	-0.560268	7.14785	5.92444	0.0149323	0.148425	protein_coding
Grb14	ENSMUSG00000026888	19.7245	13.796	-0.515697	6.96349	5.92149	0.0149573	0.148575	protein_coding
Pdcl3	ENSMUSG00000026078	12.8456	18.7893	0.547186	6.00671	5.91755	0.0149908	0.14878	protein_coding
Hspa13	ENSMUSG00000032932	3.79896	5.86489	0.623724	4.7723	5.91671	0.014998	0.14878	protein_coding
Gen1	ENSMUSG00000051235	0.66251	1.26511	0.927853	1.60606	5.91339	0.0150262	0.148961	protein_coding
Mnt	ENSMUSG00000000282	5.30356	3.48559	-0.60209	4.41261	5.91	0.0150552	0.149149	protein_coding
Gm16136	ENSMUSG00000089804	0.6003	2.19256	1.87343	0.687533	5.90837	0.0150691	0.149187	antisense_RNA
Tshz1	ENSMUSG00000046982	7.25609	4.81393	-0.58853	5.15543	5.89635	0.0151723	0.150028	protein_coding
Rxrb	ENSMUSG00000039656	20.8635	14.0025	-0.573026	6.06904	5.89613	0.0151742	0.150028	protein_coding
Ankrd11	ENSMUSG00000035569	7.31463	4.92663	-0.568916	6.72202	5.89391	0.0151933	0.150058	protein_coding
Iqsec1	ENSMUSG00000034312	8.81573	6.06233	-0.539017	6.48568	5.89344	0.0151974	0.150058	protein_coding
Vps26b	ENSMUSG00000031988	8.78181	6.08099	-0.529493	5.2996	5.88626	0.0152595	0.150571	protein_coding
Usp11	ENSMUSG00000031066	7.09936	4.78413	-0.571964	4.87366	5.8827	0.0152903	0.150709	protein_coding
Nipal3	ENSMUSG00000028803	4.62816	3.16224	-0.547815	4.94441	5.88231	0.0152938	0.150709	protein_coding
Armcx3	ENSMUSG00000049047	10.0236	15.7945	0.653543	5.45018	5.88086	0.0153063	0.150733	protein_coding
Bub3	ENSMUSG00000066979	8.34934	12.1041	0.53476	6.11049	5.86355	0.0154576	0.152007	protein_coding
Pip4k2b	ENSMUSG00000018547	8.26295	5.55657	-0.569416	5.22859	5.86211	0.0154703	0.152007	protein_coding
Eef1b2	ENSMUSG00000025967	96.1527	139.154	0.533048	8.16537	5.86104	0.0154797	0.152007	protein_coding
Zfp207	ENSMUSG00000017421	20.9089	29.8757	0.514503	7.35027	5.85772	0.0155089	0.152091	protein_coding
Fen1	ENSMUSG00000024742	6.6368	10.3974	0.645228	4.30663	5.85638	0.0155206	0.152091	protein_coding
Paics	ENSMUSG00000029247	64.5674	100.65	0.640022	7.95445	5.85482	0.0155344	0.152091	protein_coding
Taf4	ENSMUSG00000039117	5.25125	3.45742	-0.599085	4.39722	5.85445	0.0155377	0.152091	protein_coding
Chaf1b	ENSMUSG00000022945	2.24956	3.65248	0.696622	3.82033	5.85346	0.0155464	0.152091	protein_coding
Synrg	ENSMUSG00000034940	3.54772	2.39188	-0.566285	4.7604	5.8511	0.0155673	0.152195	protein_coding
Polr1d	ENSMUSG00000029642	18.2491	26.177	0.519788	6.02844	5.84068	0.0156598	0.152899	protein_coding
F2rl3	ENSMUSG00000050147	1.35421	0.671491	-1.02737	1.17839	5.84067	0.0156598	0.152899	protein_coding
Slx4ip	ENSMUSG00000027281	0.697194	1.26249	0.847355	2.46304	5.83688	0.0156936	0.153093	protein_coding
Lhx6	ENSMUSG00000026890	1.90548	0.90023	-1.06151	2.8818	5.83614	0.0157002	0.153093	protein_coding
Atf7ip	ENSMUSG00000030213	4.22859	2.86364	-0.560761	6.25647	5.82643	0.0157871	0.153839	protein_coding
Zfp36l1	ENSMUSG00000021127	59.8865	39.5071	-0.599269	7.27155	5.82405	0.0158085	0.153947	protein_coding
Trrap	ENSMUSG00000045482	3.38402	2.32458	-0.540254	5.95119	5.82016	0.0158435	0.154186	protein_coding
Rps6-ps4	ENSMUSG00000081406	4.74845	8.95235	0.92522	2.30792	5.81319	0.0159065	0.154382	processed_pseudogene
Prr11	ENSMUSG00000020493	2.09599	3.38471	0.693107	3.3331	5.81306	0.0159076	0.154382	protein_coding
Tbc1d17	ENSMUSG00000038520	5.62968	3.76001	-0.579355	5.5733	5.81252	0.0159124	0.154382	protein_coding
Rap1gds1	ENSMUSG00000028149	9.3093	6.57529	-0.501496	5.95928	5.81196	0.0159176	0.154382	protein_coding
Rps27a	ENSMUSG00000020460	186.588	273.912	0.553714	8.77122	5.8116	0.0159208	0.154382	protein_coding
Hsd17b11	ENSMUSG00000029311	12.0518	8.08269	-0.57809	5.09936	5.80857	0.0159483	0.154499	protein_coding
Plau	ENSMUSG00000021822	1.38421	2.45246	0.828962	2.12063	5.8039	0.0159907	0.15474	protein_coding
Slfn9	ENSMUSG00000069793	2.81795	4.81854	0.769932	4.43463	5.80354	0.015994	0.15474	protein_coding
Snrpf	ENSMUSG00000020018	40.6405	61.1519	0.588469	5.39676	5.80157	0.0160119	0.154808	protein_coding
Serp2	ENSMUSG00000052584	0.936786	2.16411	1.17838	0.235485	5.80047	0.0160218	0.154808	protein_coding
Furin	ENSMUSG00000030530	20.1951	12.5023	-0.690661	7.2969	5.79263	0.0160935	0.1554	protein_coding
Acadvl	ENSMUSG00000018574	319.88	207.308	-0.625735	9.52822	5.79002	0.0161174	0.155516	protein_coding
Gm45552	ENSMUSG00000110279	1.34339	0.515739	-1.34707	-0.144512	5.78491	0.0161643	0.155608	antisense_RNA
Apool	ENSMUSG00000025525	18.3832	26.733	0.539279	6.24426	5.78459	0.0161673	0.155608	protein_coding
Ldlrad4	ENSMUSG00000024544	5.31632	3.36307	-0.661058	3.51407	5.78178	0.0161932	0.155672	protein_coding
Foxo4	ENSMUSG00000042903	18.3933	12.101	-0.60515	5.79307	5.78159	0.0161949	0.155672	protein_coding
Trpm4	ENSMUSG00000038260	2.93001	1.83681	-0.668023	4.76109	5.77544	0.0162516	0.156116	protein_coding
Pkd1	ENSMUSG00000032855	4.27346	2.58392	-0.722687	5.67566	5.77166	0.0162867	0.156316	protein_coding
Sec61g	ENSMUSG00000078974	21.365	31.5307	0.560094	5.9712	5.77023	0.0162999	0.156316	protein_coding
Neurl1b	ENSMUSG00000034413	2.98534	4.76039	0.674876	4.55379	5.76979	0.016304	0.156316	protein_coding
Arl4a	ENSMUSG00000047446	3.4292	5.00345	0.545002	4.97087	5.76827	0.016318	0.156334	protein_coding
Cxxc5	ENSMUSG00000046668	28.9324	19.4561	-0.569749	5.83866	5.76733	0.0163268	0.156334	protein_coding
Kdr	ENSMUSG00000062960	15.5449	9.99781	-0.635813	6.91235	5.76434	0.0163547	0.1565	protein_coding
Hacd4	ENSMUSG00000028497	1.12467	1.78256	0.662259	3.24263	5.75797	0.016414	0.156967	protein_coding
Helz	ENSMUSG00000020721	1.96192	1.24721	-0.650485	4.663	5.75358	0.0164551	0.157052	protein_coding
Foxo3	ENSMUSG00000048756	9.99072	7.00172	-0.513232	6.05973	5.75287	0.0164618	0.157052	protein_coding
Ube2d1	ENSMUSG00000019927	11.0799	7.69653	-0.523976	5.41394	5.75136	0.0164759	0.157052	protein_coding
Topbp1	ENSMUSG00000032555	3.39273	5.3265	0.648881	5.54917	5.74988	0.0164897	0.157052	protein_coding
Pole3	ENSMUSG00000028394	14.6287	21.1375	0.529457	5.13899	5.74907	0.0164973	0.157052	protein_coding
Plcb4	ENSMUSG00000039943	5.83629	8.863	0.601141	5.98384	5.74843	0.0165034	0.157052	protein_coding
Sucla2	ENSMUSG00000022110	88.5401	129.85	0.552279	8.71108	5.74574	0.0165287	0.157125	protein_coding
Arhgap33	ENSMUSG00000036882	0.961125	1.61621	0.743908	2.72486	5.74495	0.0165362	0.157125	protein_coding
Gm5620	ENSMUSG00000056904	0.474673	1.08925	1.17107	0.0760362	5.74336	0.0165511	0.157166	processed_pseudogene
Cdc27	ENSMUSG00000020687	5.67997	8.85316	0.637827	5.44222	5.74086	0.0165747	0.157291	protein_coding
Chm	ENSMUSG00000025531	2.44278	4.40778	0.847346	4.45472	5.73564	0.0166241	0.157658	protein_coding
Rpl37	ENSMUSG00000041841	288.17	429.87	0.576786	8.22434	5.73425	0.0166372	0.157666	protein_coding
Psmd6	ENSMUSG00000021737	32.7945	46.8252	0.513009	6.48246	5.73241	0.0166546	0.157666	protein_coding
Lama5	ENSMUSG00000015647	5.80869	4.10013	-0.501689	5.86996	5.73219	0.0166567	0.157666	protein_coding
4930402H24Rik	ENSMUSG00000027309	9.85934	6.87901	-0.51992	6.53126	5.72578	0.0167176	0.157859	protein_coding
Ctdsp2	ENSMUSG00000078429	51.9934	35.2626	-0.559637	7.84284	5.72559	0.0167194	0.157859	protein_coding
Orc6	ENSMUSG00000031697	5.86588	9.08854	0.62745	4.14905	5.72171	0.0167564	0.157907	protein_coding
Erg	ENSMUSG00000040732	9.68434	6.53765	-0.56873	4.87331	5.71531	0.0168176	0.158283	protein_coding
Creb3	ENSMUSG00000028466	13.7599	20.652	0.584156	5.29504	5.7128	0.0168417	0.15841	protein_coding
Oit3	ENSMUSG00000009654	1.37511	2.61352	0.915153	2.39659	5.70854	0.0168825	0.158623	protein_coding
Rab3d	ENSMUSG00000019066	3.31047	6.48532	0.973659	4.27618	5.70822	0.0168857	0.158623	protein_coding
Mapkapk3	ENSMUSG00000032577	3.62026	2.32451	-0.636178	4.11426	5.70292	0.0169367	0.159002	protein_coding
Pafah1b3	ENSMUSG00000005447	12.0486	17.8697	0.568046	4.92503	5.70032	0.0169618	0.159138	protein_coding
Mrpl13	ENSMUSG00000022370	7.8065	11.6431	0.575491	6.21338	5.69371	0.0170258	0.159518	protein_coding
Ift80	ENSMUSG00000027778	0.706567	1.38491	0.96425	3.60819	5.69163	0.017046	0.159518	protein_coding
Ppp1r9b	ENSMUSG00000038976	20.0719	12.4689	-0.684796	6.43806	5.6915	0.0170473	0.159518	protein_coding
Foxj2	ENSMUSG00000003154	6.80428	4.46991	-0.602536	4.97762	5.6904	0.017058	0.159518	protein_coding
Rpl18	ENSMUSG00000059070	88.7593	128.721	0.536167	8.72644	5.6896	0.0170658	0.159518	protein_coding
Grb2	ENSMUSG00000059923	50.6459	35.9347	-0.494784	7.02947	5.6895	0.0170667	0.159518	protein_coding
Zfp131	ENSMUSG00000094870	7.34547	11.0998	0.592442	4.76615	5.67854	0.0171736	0.160257	protein_coding
Btnl9	ENSMUSG00000040283	8.0051	5.04479	-0.662469	5.37257	5.67738	0.017185	0.160257	protein_coding
Hmgcr	ENSMUSG00000021670	3	4.58137	0.609724	4.72793	5.67276	0.0172304	0.160543	protein_coding
Polr1e	ENSMUSG00000028318	9.63347	14.6838	0.606366	5.50714	5.6661	0.0172959	0.160759	protein_coding
Ogdh	ENSMUSG00000020456	163.863	108.104	-0.599899	9.59334	5.65634	0.0173924	0.161441	protein_coding
Hcn2	ENSMUSG00000020331	1.93475	0.990897	-0.940045	2.35391	5.65546	0.0174011	0.161441	protein_coding
Fam222a	ENSMUSG00000041930	3.04774	1.63652	-0.883137	2.98637	5.65381	0.0174175	0.161441	protein_coding
Tbc1d22a	ENSMUSG00000051864	11.3363	7.35888	-0.618485	4.98198	5.65355	0.0174201	0.161441	protein_coding
Osbpl9	ENSMUSG00000028559	9.04004	12.8657	0.508271	6.21216	5.65312	0.0174244	0.161441	protein_coding
Ppp1r3a	ENSMUSG00000042717	6.65531	11.6041	0.80033	5.91113	5.65124	0.017443	0.161513	protein_coding
Kmt2a	ENSMUSG00000002028	1.72534	1.03569	-0.735666	4.60176	5.64835	0.0174718	0.161679	protein_coding
Gm6210	ENSMUSG00000107951	1.1607	0.332439	-1.79694	0.772217	5.63568	0.0175985	0.162448	processed_pseudogene
Agtrap	ENSMUSG00000029007	9.71637	6.77677	-0.520547	5.18148	5.6341	0.0176144	0.162493	protein_coding
Rpl31	ENSMUSG00000073702	306.788	451.738	0.558131	9.24395	5.62558	0.0177002	0.163096	protein_coding
Tes	ENSMUSG00000029552	1.07339	1.71554	0.680034	3.20186	5.62449	0.0177112	0.163096	protein_coding
Brd3	ENSMUSG00000026918	9.16603	5.98922	-0.611431	5.85922	5.62387	0.0177175	0.163096	protein_coding
Zfp760	ENSMUSG00000067928	1.24007	2.40433	0.948173	2.85894	5.62327	0.0177236	0.163096	protein_coding
Mphosph10	ENSMUSG00000030521	4.32208	6.60838	0.609759	4.28278	5.6082	0.0178767	0.164402	protein_coding
Fgfrl1	ENSMUSG00000008090	8.9105	5.8713	-0.596821	4.42854	5.60713	0.0178875	0.164402	protein_coding
Scai	ENSMUSG00000035236	0.670314	1.26919	0.913689	3.49391	5.60357	0.0179239	0.164635	protein_coding
Ddx50	ENSMUSG00000020076	27.7615	40.469	0.542799	6.37651	5.60091	0.0179512	0.164783	protein_coding
Lzts1	ENSMUSG00000036306	1.68904	1.03406	-0.702015	3.29639	5.5988	0.0179727	0.164879	protein_coding
Atg13	ENSMUSG00000027244	13.5657	9.27474	-0.546341	5.69734	5.59565	0.0180051	0.164927	protein_coding
Pdzd2	ENSMUSG00000022197	6.32575	3.83986	-0.7187	6.85221	5.59389	0.0180233	0.164927	protein_coding
Ift46	ENSMUSG00000002031	4.8848	7.03275	0.526638	5.20781	5.59384	0.0180238	0.164927	protein_coding
Ep400	ENSMUSG00000029505	3.57755	2.43906	-0.550341	5.45107	5.59352	0.018027	0.164927	protein_coding
Trim8	ENSMUSG00000025034	25.8571	16.7011	-0.628082	6.16644	5.59286	0.0180338	0.164927	protein_coding
Ngdn	ENSMUSG00000022204	24.8198	37.0002	0.573718	5.15592	5.59183	0.0180445	0.164927	protein_coding
Psma5	ENSMUSG00000068749	60.1751	88.4991	0.555497	6.56276	5.58526	0.0181122	0.165347	protein_coding
Rps15a	ENSMUSG00000008683	48.8907	72.5709	0.5696	8.51574	5.58522	0.0181126	0.165347	protein_coding
Lsm14b	ENSMUSG00000039108	23.0939	16.1399	-0.51507	5.87937	5.5835	0.0181304	0.165408	protein_coding
Idi1	ENSMUSG00000058258	2.45332	4.35887	0.822128	3.5003	5.57949	0.018172	0.165686	protein_coding
Mapre2	ENSMUSG00000024277	25.4097	18.0438	-0.49388	7.841	5.5748	0.0182207	0.16586	protein_coding
Larp7	ENSMUSG00000027968	20.0096	30.5159	0.607035	5.84175	5.57466	0.0182222	0.16586	protein_coding
Cct3	ENSMUSG00000001416	25.6697	37.4715	0.545403	7.5974	5.5723	0.0182468	0.16586	protein_coding
Rpl23	ENSMUSG00000071415	317.017	479.336	0.596357	9.40114	5.57113	0.018259	0.165869	protein_coding
Eif2s3x	ENSMUSG00000035150	16.7015	26.2751	0.652323	6.2912	5.56655	0.0183068	0.166073	protein_coding
Tmc7	ENSMUSG00000042246	1.19131	0.66638	-0.837099	2.52966	5.56494	0.0183236	0.166073	protein_coding
Rpl18a	ENSMUSG00000045128	428.927	639.707	0.576613	9.80188	5.56186	0.0183559	0.166073	protein_coding
Thoc1	ENSMUSG00000024287	6.18116	9.39722	0.601428	4.85137	5.56167	0.0183579	0.166073	protein_coding
Tyk2	ENSMUSG00000032175	3.75723	2.46851	-0.601042	4.48439	5.56152	0.0183595	0.166073	protein_coding
Itgb4	ENSMUSG00000020758	0.546934	1.38518	1.3453	2.67062	5.55891	0.0183869	0.166219	protein_coding
Klf2	ENSMUSG00000055148	40.4208	25.0403	-0.68784	5.98719	5.5562	0.0184154	0.166376	protein_coding
Eri2	ENSMUSG00000030929	0.964162	1.54139	0.674009	3.11301	5.55506	0.0184273	0.166383	protein_coding
Abraxas2	ENSMUSG00000030965	3.26565	4.76875	0.544051	5.02856	5.55354	0.0184433	0.166393	protein_coding
Fam26e	ENSMUSG00000049872	1.21186	2.58088	1.07472	1.67571	5.55283	0.0184508	0.166393	protein_coding
Prdx3	ENSMUSG00000024997	120.621	177.027	0.553091	7.72588	5.5474	0.0185082	0.166809	protein_coding
Prim2	ENSMUSG00000026134	1.21597	2.09553	0.778536	3.2272	5.53925	0.0185946	0.167392	protein_coding
Rps3a1	ENSMUSG00000028081	707.424	1059.35	0.582441	9.69482	5.53917	0.0185954	0.167392	protein_coding
Fam92a	ENSMUSG00000028218	8.81674	12.8874	0.545743	5.61438	5.53129	0.0186793	0.16788	protein_coding
Ears2	ENSMUSG00000030871	9.37242	13.6701	0.543215	5.83844	5.53127	0.0186796	0.16788	protein_coding
Dhrs7	ENSMUSG00000021094	64.026	45.7793	-0.483464	6.20789	5.52997	0.0186934	0.16788	protein_coding
Higd1a	ENSMUSG00000038412	26.84	40.5863	0.595789	6.62016	5.52985	0.0186947	0.16788	protein_coding
1700037H04Rik	ENSMUSG00000027327	8.74449	12.9582	0.568115	4.58136	5.52369	0.0187607	0.168269	protein_coding
Fam189a2	ENSMUSG00000071604	45.9996	32.4299	-0.503514	6.69286	5.51845	0.018817	0.168672	protein_coding
Usf1	ENSMUSG00000026641	17.8535	11.5284	-0.626947	5.43076	5.51337	0.0188717	0.169025	protein_coding
Aspn	ENSMUSG00000021388	31.9566	51.543	0.68873	6.55065	5.51169	0.0188898	0.169025	protein_coding
Txlng	ENSMUSG00000038344	1.37384	2.23768	0.698773	3.70563	5.51164	0.0188903	0.169025	protein_coding
Fnbp1	ENSMUSG00000075415	6.43675	4.58152	-0.489872	5.83877	5.50585	0.0189529	0.169358	protein_coding
Elof1	ENSMUSG00000013822	20.9176	29.738	0.506432	5.38189	5.50554	0.0189563	0.169358	protein_coding
Foxo6	ENSMUSG00000052135	1.86402	0.968468	-0.929761	2.01912	5.50504	0.0189617	0.169358	protein_coding
Nxt1	ENSMUSG00000036992	10.9734	16.9427	0.623168	3.90558	5.50291	0.0189848	0.169463	protein_coding
Wdr75	ENSMUSG00000025995	3.92574	5.81728	0.565565	4.52587	5.49662	0.0190533	0.169896	protein_coding
Prph	ENSMUSG00000023484	0.258547	1.23162	2.24014	0.462018	5.49635	0.0190562	0.169896	protein_coding
Atf4	ENSMUSG00000042406	54.7597	75.9918	0.472558	6.77007	5.49099	0.0191147	0.17026	protein_coding
Nptn	ENSMUSG00000032336	14.9522	21.6233	0.531323	6.765	5.49042	0.0191209	0.17026	protein_coding
Pawr	ENSMUSG00000035873	2.40382	4.05533	0.749258	2.50713	5.48947	0.0191313	0.17026	protein_coding
Rrp15	ENSMUSG00000001305	2.63216	4.1741	0.660269	3.40669	5.48585	0.019171	0.170472	protein_coding
Sf3b1	ENSMUSG00000025982	17.4874	25.676	0.553677	7.88351	5.48281	0.0192043	0.170603	protein_coding
Sema4c	ENSMUSG00000026121	5.8762	3.72959	-0.650299	4.5347	5.4807	0.0192276	0.170708	protein_coding
Aplnr	ENSMUSG00000044338	30.4585	16.3152	-0.898834	6.52179	5.47652	0.0192736	0.170913	protein_coding
Mlana	ENSMUSG00000024806	1.22845	2.99862	1.28166	0.394641	5.47174	0.0193263	0.171112	protein_coding
Gm37711	ENSMUSG00000102796	1.04902	0.421637	-1.24244	0.611855	5.47099	0.0193347	0.171112	TEC
Zfp57	ENSMUSG00000036036	1.52385	2.65462	0.792042	2.91688	5.46975	0.0193484	0.171112	protein_coding
Vav2	ENSMUSG00000009621	2.84503	1.75091	-0.693407	4.06884	5.4697	0.0193489	0.171112	protein_coding
Vps29	ENSMUSG00000029462	8.26398	12.3369	0.576587	5.92808	5.46928	0.0193536	0.171112	protein_coding
Pcnx	ENSMUSG00000021140	7.08358	4.81533	-0.55633	6.23046	5.46766	0.0193716	0.171169	protein_coding
Pitpnm2	ENSMUSG00000029406	5.7281	3.88863	-0.556958	6.00535	5.4659	0.0193911	0.17124	protein_coding
Nrep	ENSMUSG00000042834	133.146	91.3496	-0.543878	8.19324	5.46186	0.0194359	0.171364	protein_coding
Zmpste24	ENSMUSG00000043207	3.58189	5.26098	0.552116	4.92911	5.46155	0.0194394	0.171364	protein_coding
Ppih	ENSMUSG00000060288	5.49307	8.94522	0.698237	3.71	5.45917	0.0194659	0.171364	protein_coding
Nynrin	ENSMUSG00000075592	7.76019	5.13437	-0.592905	5.64457	5.45805	0.0194783	0.171364	protein_coding
4930579G24Rik	ENSMUSG00000027811	3.11759	5.0625	0.696012	2.95511	5.4557	0.0195045	0.171364	protein_coding
Tom1l1	ENSMUSG00000020541	2.33748	3.60279	0.62001	4.46622	5.45563	0.0195054	0.171364	protein_coding
Ssh3	ENSMUSG00000034616	4.76268	2.66709	-0.82491	3.44614	5.45521	0.0195101	0.171364	protein_coding
Arid5a	ENSMUSG00000037447	0.827942	1.28811	0.634403	3.67507	5.45477	0.0195149	0.171364	protein_coding
Rpl37a	ENSMUSG00000046330	227.016	333.507	0.554723	8.57073	5.45429	0.0195203	0.171364	protein_coding
Plekhm1	ENSMUSG00000034247	4.06803	2.23218	-0.857217	4.32512	5.45243	0.0195411	0.171408	protein_coding
Rtn4rl1	ENSMUSG00000045287	11.8304	7.93272	-0.573271	5.18306	5.45179	0.0195483	0.171408	protein_coding
Gpd2	ENSMUSG00000026827	2.51424	4.38423	0.806253	4.42653	5.44998	0.0195685	0.171484	protein_coding
Atp2b4	ENSMUSG00000026463	3.23023	2.08784	-0.628226	5.09103	5.44842	0.019586	0.171536	protein_coding
Rbp7	ENSMUSG00000028996	72.1212	47.8829	-0.588525	5.49045	5.44496	0.0196249	0.171634	protein_coding
Gchfr	ENSMUSG00000046814	3.26389	6.86432	1.07634	1.66102	5.44351	0.0196412	0.171634	protein_coding
Rps7	ENSMUSG00000061477	594.757	883.549	0.570895	9.41501	5.44233	0.0196545	0.171634	protein_coding
Psmc1	ENSMUSG00000021178	84.4927	118.373	0.486328	7.21841	5.44229	0.0196549	0.171634	protein_coding
mt-Nd1	ENSMUSG00000064341	20405.1	37564.3	0.880427	14.6716	5.43839	0.0196988	0.171849	protein_coding
Bicral	ENSMUSG00000036568	2.56015	1.61889	-0.656539	3.85717	5.43806	0.0197026	0.171849	protein_coding
Magohb	ENSMUSG00000030188	4.05454	7.01886	0.785093	3.18191	5.43653	0.0197199	0.171899	protein_coding
Rcor2	ENSMUSG00000024968	9.73902	6.42113	-0.596311	4.72768	5.42952	0.0197992	0.172489	protein_coding
Trim56	ENSMUSG00000043279	2.04653	1.27726	-0.681872	4.02224	5.42815	0.0198147	0.172524	protein_coding
Rack1	ENSMUSG00000020372	141.156	203.835	0.530073	9.73303	5.42615	0.0198373	0.17262	protein_coding
Gm15500	ENSMUSG00000086583	21.9259	32.0371	0.545812	4.73115	5.41134	0.0200064	0.173923	transcribed_processed_pseudogene
Ttc28	ENSMUSG00000033209	3.13989	1.92721	-0.70025	5.03662	5.41098	0.0200105	0.173923	protein_coding
Trappc12	ENSMUSG00000020628	11.3133	8.00673	-0.497817	5.4144	5.40976	0.0200244	0.173942	protein_coding
Gng5	ENSMUSG00000068523	41.2757	59.2191	0.520114	7.06664	5.40753	0.0200501	0.174064	protein_coding
Faap100	ENSMUSG00000025384	8.473	5.27776	-0.678269	5.23401	5.40356	0.0200957	0.174311	protein_coding
Setd1b	ENSMUSG00000038384	3.35669	1.91443	-0.80573	5.07415	5.40138	0.0201209	0.174311	protein_coding
Cpeb3	ENSMUSG00000039652	4.61397	2.98405	-0.630219	4.88161	5.40098	0.0201254	0.174311	protein_coding
Tbc1d2b	ENSMUSG00000037410	3.21083	2.08632	-0.616876	4.61008	5.39821	0.0201574	0.174486	protein_coding
Arrdc4	ENSMUSG00000042659	9.69872	5.93393	-0.705569	5.05462	5.39584	0.0201848	0.174622	protein_coding
Rom1	ENSMUSG00000071648	3.34156	1.76621	-0.896738	2.09243	5.39305	0.0202171	0.174716	protein_coding
Myadml2	ENSMUSG00000025141	19.2597	12.3341	-0.636983	4.04267	5.39288	0.0202191	0.174716	protein_coding
Prps1	ENSMUSG00000031432	13.613	20.9422	0.618627	5.04593	5.39085	0.0202427	0.174818	protein_coding
Rwdd2a	ENSMUSG00000032417	0.544804	1.21277	1.12976	0.273876	5.389	0.0202641	0.174837	protein_coding
Lgals4	ENSMUSG00000053964	6.81556	2.84847	-1.25455	3.61647	5.38863	0.0202684	0.174837	protein_coding
Zfp618	ENSMUSG00000028358	1.64442	0.996696	-0.720582	3.70816	5.3845	0.0203164	0.175115	protein_coding
Rpl15	ENSMUSG00000012405	165.453	240.765	0.541029	8.87306	5.38383	0.0203242	0.175115	protein_coding
Gm14057	ENSMUSG00000089662	1.84108	0.692956	-1.40971	-0.358194	5.38264	0.0203381	0.175134	transcribed_processed_pseudogene
St6gal1	ENSMUSG00000022885	4.63987	2.93128	-0.657164	4.29126	5.37859	0.0203853	0.175439	protein_coding
Dstn	ENSMUSG00000015932	281.624	420.808	0.579306	9.33236	5.37635	0.0204116	0.175459	protein_coding
Ppp1r13b	ENSMUSG00000021285	10.774	7.28167	-0.561833	5.45321	5.37582	0.0204177	0.175459	protein_coding
Dpy30	ENSMUSG00000024067	42.4507	61.2592	0.527488	5.60741	5.37536	0.0204231	0.175459	protein_coding
Rpl26	ENSMUSG00000060938	267.633	394.143	0.558295	8.84428	5.37339	0.0204462	0.175557	protein_coding
Lyve1	ENSMUSG00000030787	6.80486	10.8709	0.679138	4.62906	5.37078	0.0204768	0.175718	protein_coding
C1qtnf1	ENSMUSG00000017446	8.44156	5.23882	-0.681657	4.4951	5.3661	0.0205318	0.175757	protein_coding
Pdcd6ip	ENSMUSG00000032504	14.1891	9.87706	-0.52115	6.42904	5.36582	0.0205352	0.175757	protein_coding
Cox8a	ENSMUSG00000035885	736.255	1054.39	0.51806	8.87866	5.36533	0.0205409	0.175757	protein_coding
Sat1	ENSMUSG00000025283	11.7261	17.2834	0.557833	5.27733	5.36436	0.0205523	0.175757	protein_coding
Sfxn1	ENSMUSG00000021474	5.91868	9.01175	0.610054	4.33835	5.36319	0.0205661	0.175775	protein_coding
Garem1	ENSMUSG00000042680	5.14199	3.23635	-0.667125	4.43807	5.36211	0.0205788	0.175782	protein_coding
1810022K09Rik	ENSMUSG00000078784	18.8657	27.814	0.55795	5.3012	5.35552	0.0206567	0.176346	protein_coding
Rnf13	ENSMUSG00000036503	4.93255	8.00096	0.696005	5.94869	5.35098	0.0207107	0.176605	protein_coding
Stk10	ENSMUSG00000020272	2.65822	1.52331	-0.790772	3.53228	5.35097	0.0207107	0.176605	protein_coding
Clcn5	ENSMUSG00000004317	2.04405	2.98316	0.54399	4.79682	5.34828	0.0207428	0.176777	protein_coding
Cacng6	ENSMUSG00000078815	15.0417	9.95382	-0.599114	4.69044	5.34044	0.0208362	0.177472	protein_coding
Sphkap	ENSMUSG00000026163	0.62576	1.28707	1.03385	3.0981	5.33942	0.0208485	0.177474	protein_coding
Ndufab1-ps	ENSMUSG00000091989	2.39539	0.817171	-1.5721	-0.117118	5.33659	0.0208823	0.177661	processed_pseudogene
Camk2a	ENSMUSG00000024617	12.3878	8.37427	-0.566787	6.33259	5.33165	0.0209416	0.178063	protein_coding
G6pdx	ENSMUSG00000031400	4.522	6.78693	0.588716	4.07248	5.32918	0.0209713	0.178135	protein_coding
Ube2h	ENSMUSG00000039159	28.7165	20.0078	-0.520408	6.91576	5.32895	0.020974	0.178135	protein_coding
Trappc1	ENSMUSG00000049299	59.0364	87.8868	0.572979	6.29555	5.3246	0.0210264	0.178479	protein_coding
Ehhadh	ENSMUSG00000022853	3.68148	5.86281	0.676622	3.79321	5.32184	0.0210598	0.17866	protein_coding
Uqcrh-ps1	ENSMUSG00000037438	1.84253	0.38023	-2.12678	-1.16551	5.31945	0.0210887	0.178759	processed_pseudogene
Hells	ENSMUSG00000025001	0.973139	1.84742	0.917763	3.25719	5.31888	0.0210955	0.178759	protein_coding
Tlr4	ENSMUSG00000039005	1.25352	2.38193	0.918102	3.24846	5.3112	0.0211888	0.179383	protein_coding
Cox7b	ENSMUSG00000031231	504.137	755.943	0.584345	9.52037	5.30032	0.0213215	0.180285	protein_coding
Eef1a2	ENSMUSG00000016349	230.725	161.849	-0.511365	8.72633	5.30011	0.021324	0.180285	protein_coding
Ripor1	ENSMUSG00000038604	20.2006	12.3527	-0.70697	6.134	5.29614	0.0213728	0.180492	protein_coding
Dynlt3	ENSMUSG00000031176	22.8666	34.4705	0.590611	6.14839	5.2917	0.0214273	0.180747	protein_coding
Crnde	ENSMUSG00000031736	4.68753	7.36139	0.645748	3.54717	5.28958	0.0214533	0.180864	processed_transcript
Sympk	ENSMUSG00000023118	10.9428	7.27987	-0.586247	6.64345	5.28513	0.0215083	0.180993	protein_coding
Nckap5l	ENSMUSG00000023009	6.42183	3.87548	-0.722181	4.76376	5.28438	0.0215176	0.180993	protein_coding
Sh2b1	ENSMUSG00000030733	24.4905	16.4246	-0.574376	6.38796	5.28415	0.0215204	0.180993	protein_coding
Cd55	ENSMUSG00000026399	2.13225	3.65783	0.775873	3.74499	5.28313	0.021533	0.180993	protein_coding
Ywhag	ENSMUSG00000051391	44.9816	30.2077	-0.573745	7.74834	5.28249	0.021541	0.180993	protein_coding
Ckmt2	ENSMUSG00000021622	138.171	203.281	0.556804	7.9313	5.28244	0.0215416	0.180993	protein_coding
Tanc1	ENSMUSG00000035168	3.48007	2.36214	-0.558223	5.46934	5.27962	0.0215764	0.181113	protein_coding
Gm28875	ENSMUSG00000100975	2.36029	0.889637	-1.37015	0.343212	5.27932	0.0215802	0.181113	lincRNA
Pdgfb	ENSMUSG00000000489	15.3855	9.69014	-0.664556	5.26168	5.27792	0.0215975	0.181131	protein_coding
Npm1	ENSMUSG00000057113	106.4	167.829	0.657193	8.4475	5.27718	0.0216067	0.181131	protein_coding
Brcc3	ENSMUSG00000031201	2.81827	4.47589	0.663791	4.78258	5.2731	0.0216574	0.181253	protein_coding
4931431B13Rik	ENSMUSG00000108354	0.693958	1.50126	1.11257	0.645346	5.27307	0.0216578	0.181253	processed_transcript
Csnk1e	ENSMUSG00000022433	16.6952	11.899	-0.487793	6.56654	5.26917	0.0217064	0.181456	protein_coding
Psma1	ENSMUSG00000030751	38.1636	54.4612	0.512389	7.04417	5.26383	0.0217731	0.18179	protein_coding
Gid4	ENSMUSG00000018415	9.18309	6.10752	-0.589173	5.2782	5.26303	0.0217831	0.18179	protein_coding
Pcdhga2	ENSMUSG00000103332	1.80392	1.08606	-0.730277	2.85372	5.25995	0.0218216	0.181888	protein_coding
Rad18	ENSMUSG00000030254	0.868806	1.56114	0.840387	2.74411	5.25968	0.021825	0.181888	protein_coding
Hrc	ENSMUSG00000038239	73.7623	50.2389	-0.554685	7.36843	5.25916	0.0218315	0.181888	protein_coding
Ctif	ENSMUSG00000052928	2.96609	1.93535	-0.613652	3.98916	5.25228	0.021918	0.182507	protein_coding
Fyn	ENSMUSG00000019843	14.5214	10.3874	-0.482683	5.81396	5.25101	0.021934	0.182538	protein_coding
Rpl10a-ps1	ENSMUSG00000084416	6.57164	11.3684	0.791391	2.50043	5.2417	0.0220518	0.183091	processed_pseudogene
mt-Nd6	ENSMUSG00000064368	62.7053	106.302	0.759104	5.37954	5.24122	0.0220577	0.183091	protein_coding
Foxm1	ENSMUSG00000001517	3.37897	5.41029	0.68151	4.59791	5.24041	0.0220681	0.183091	protein_coding
Cst9	ENSMUSG00000027445	1.41157	3.73155	1.38078	0.758729	5.23956	0.0220788	0.183091	protein_coding
Neurl2	ENSMUSG00000039873	33.1653	23.0028	-0.526081	4.88869	5.23843	0.0220932	0.183091	protein_coding
Plrg1	ENSMUSG00000027998	14.6584	20.9848	0.515861	5.59933	5.23798	0.0220989	0.183091	protein_coding
Pard3	ENSMUSG00000025812	3.38893	2.39341	-0.500009	5.44314	5.23644	0.0221185	0.183152	protein_coding
Wipi1	ENSMUSG00000041895	16.0106	11.3385	-0.49654	5.96549	5.23476	0.0221398	0.18318	protein_coding
Ehmt1	ENSMUSG00000036893	6.50454	4.49056	-0.531849	5.53542	5.23423	0.0221466	0.18318	protein_coding
Dnal4	ENSMUSG00000022420	12.0858	8.00701	-0.588889	4.62007	5.23166	0.0221793	0.183349	protein_coding
Clca3a1	ENSMUSG00000056025	6.25277	10.0346	0.679065	4.92315	5.22776	0.0222291	0.183567	protein_coding
Sema3d	ENSMUSG00000040254	1.43057	2.46162	0.777815	3.99132	5.22767	0.0222304	0.183567	protein_coding
Ccl6	ENSMUSG00000018927	0.846295	2.09083	1.31837	1.36267	5.22339	0.0222851	0.183917	protein_coding
Suco	ENSMUSG00000040297	2.79985	4.39676	0.647721	4.94269	5.21849	0.022348	0.184334	protein_coding
Arl2	ENSMUSG00000024944	16.2487	11.189	-0.535854	5.36613	5.21628	0.0223764	0.184392	protein_coding
Id4	ENSMUSG00000021379	1.63621	2.94277	0.838579	1.87723	5.21474	0.0223963	0.184392	protein_coding
Lmod2	ENSMUSG00000029683	81.6806	141.07	0.787868	7.70308	5.21236	0.0224268	0.184392	protein_coding
Fancb	ENSMUSG00000047757	0.619559	1.18464	0.924002	1.37889	5.21217	0.0224293	0.184392	protein_coding
Rpl12	ENSMUSG00000038900	135.177	194.575	0.525381	9.15972	5.21147	0.0224384	0.184392	protein_coding
Sash1	ENSMUSG00000015305	6.48356	4.53898	-0.514268	5.61463	5.21144	0.0224388	0.184392	protein_coding
Mcm8	ENSMUSG00000027353	1.40824	2.73871	0.949321	2.85803	5.21121	0.0224418	0.184392	protein_coding
Rbm15b	ENSMUSG00000074102	8.33027	5.68157	-0.549259	5.56885	5.20864	0.0224749	0.18452	protein_coding
Syce2	ENSMUSG00000003824	1.46975	2.55238	0.792731	1.93739	5.20732	0.022492	0.18452	protein_coding
Gm8186	ENSMUSG00000049124	20.7015	32.31	0.638229	3.30283	5.20712	0.0224945	0.18452	protein_coding
Acaa2	ENSMUSG00000036880	836.899	558	-0.584794	10.102	5.20537	0.0225172	0.184543	protein_coding
Rheb	ENSMUSG00000028945	12.1097	17.1257	0.499236	6.76908	5.20499	0.0225222	0.184543	protein_coding
Ambra1	ENSMUSG00000040506	6.18272	3.90786	-0.656676	5.01885	5.20135	0.0225694	0.184667	protein_coding
Hnrnpll	ENSMUSG00000024095	3.421	4.96282	0.535351	5.56134	5.19558	0.0226443	0.185136	protein_coding
Ran	ENSMUSG00000029430	57.5086	83.5819	0.539287	7.49059	5.19166	0.0226955	0.185449	protein_coding
St3gal2	ENSMUSG00000031749	8.55369	5.88194	-0.537682	5.24234	5.19074	0.0227075	0.185449	protein_coding
Pla2g12a	ENSMUSG00000027999	7.53383	10.8711	0.530568	5.03363	5.18604	0.0227691	0.185821	protein_coding
Plscr1	ENSMUSG00000032369	5.56335	8.32981	0.579583	4.04489	5.18354	0.0228019	0.185912	protein_coding
Tex30	ENSMUSG00000026049	2.55945	4.15042	0.693917	2.64219	5.18259	0.0228143	0.185912	protein_coding
Map3k3	ENSMUSG00000020700	14.3879	9.89842	-0.538657	5.66602	5.17913	0.0228598	0.185995	protein_coding
Bend7	ENSMUSG00000048186	1.60971	0.941015	-0.776675	2.52357	5.17802	0.0228744	0.185995	protein_coding
Otud7b	ENSMUSG00000038495	6.74678	4.7954	-0.492876	5.77842	5.17167	0.0229582	0.186428	protein_coding
Dhfr	ENSMUSG00000021707	2.74404	5.18583	0.91432	4.30022	5.17113	0.0229652	0.186428	protein_coding
Ddi2	ENSMUSG00000078515	5.23254	3.47679	-0.586995	5.43992	5.16625	0.0230299	0.186851	protein_coding
Alpk3	ENSMUSG00000038763	22.415	16.0342	-0.483342	7.00149	5.16344	0.0230671	0.187051	protein_coding
Sardh	ENSMUSG00000009614	9.48871	6.57801	-0.525958	5.50274	5.16144	0.0230937	0.187165	protein_coding
Gm6170	ENSMUSG00000100078	1.22527	0.36824	-1.75522	0.39616	5.15478	0.0231825	0.18778	processed_pseudogene
Lrp5	ENSMUSG00000024913	6.59782	3.88639	-0.760283	5.75033	5.15317	0.023204	0.18778	protein_coding
Mta1	ENSMUSG00000021144	28.5045	18.9486	-0.586842	6.26203	5.15291	0.0232074	0.18778	protein_coding
Gm7618	ENSMUSG00000095288	4.84829	1.01466	-2.23868	-0.590272	5.14909	0.0232585	0.188032	processed_pseudogene
Fgfr1op	ENSMUSG00000069135	3.73615	5.61982	0.585283	4.17597	5.14708	0.0232855	0.188032	protein_coding
Ppargc1a	ENSMUSG00000029167	13.5048	23.0575	0.770883	6.83599	5.14614	0.0232981	0.188032	protein_coding
Fras1	ENSMUSG00000034687	1.52753	0.939266	-0.70757	4.5228	5.14586	0.0233019	0.188032	protein_coding
Zc3h4	ENSMUSG00000059273	7.05102	4.59209	-0.615601	5.79786	5.14497	0.0233139	0.188032	protein_coding
Tmod4	ENSMUSG00000005628	1.30726	0.646754	-0.987224	0.934379	5.14493	0.0233144	0.188032	protein_coding
Cep135	ENSMUSG00000036403	0.810129	1.49325	0.872612	2.9696	5.14396	0.0233273	0.188034	protein_coding
Gna12	ENSMUSG00000000149	40.1	27.3803	-0.549145	6.90367	5.14045	0.0233746	0.188313	protein_coding
Selenon	ENSMUSG00000050989	18.29	12.608	-0.534719	5.86013	5.13933	0.0233897	0.188333	protein_coding
Jun	ENSMUSG00000052684	37.1312	22.349	-0.730853	6.63962	5.1381	0.0234062	0.188349	protein_coding
Nup205	ENSMUSG00000038759	3.36137	5.56878	0.726324	5.30507	5.13591	0.0234357	0.188398	protein_coding
Dcakd	ENSMUSG00000020935	27.073	19.0454	-0.505444	5.93347	5.13176	0.0234918	0.188746	protein_coding
Filip1l	ENSMUSG00000043336	7.63577	11.5484	0.594602	5.61922	5.13	0.0235157	0.188836	protein_coding
Tmem256	ENSMUSG00000070394	37.0656	53.6127	0.530846	5.59533	5.12496	0.0235841	0.188877	protein_coding
Ppp1r12b	ENSMUSG00000073557	13.1453	9.30236	-0.499234	7.44319	5.12495	0.0235843	0.188877	protein_coding
Rgs6	ENSMUSG00000021219	2.87422	1.82917	-0.647744	4.62979	5.12439	0.0235919	0.188877	protein_coding
Rsrc2	ENSMUSG00000029422	7.63489	11.1002	0.538967	6.20574	5.12402	0.0235969	0.188877	protein_coding
Ahdc1	ENSMUSG00000037692	6.88604	3.8906	-0.820041	5.5903	5.122	0.0236244	0.188995	protein_coding
Hmg20a	ENSMUSG00000032329	6.13428	4.38856	-0.484237	5.66501	5.11675	0.023696	0.189414	protein_coding
Mrps25	ENSMUSG00000014551	3.71884	5.52261	0.569021	4.87169	5.11576	0.0237095	0.189414	protein_coding
Prrc2a	ENSMUSG00000024393	38.5152	24.7738	-0.63593	7.97785	5.1146	0.0237253	0.189414	protein_coding
Basp1	ENSMUSG00000045763	6.83301	10.7357	0.65491	3.96599	5.11261	0.0237526	0.189414	protein_coding
Kcne3	ENSMUSG00000035165	0.60983	1.55679	1.32456	0.841821	5.11257	0.0237531	0.189414	protein_coding
Ap3s1	ENSMUSG00000024480	17.1885	25.2369	0.556096	4.92139	5.11083	0.023777	0.189503	protein_coding
Vstm4	ENSMUSG00000050666	9.84971	6.67647	-0.560508	4.56246	5.10871	0.023806	0.189633	protein_coding
Inafm2	ENSMUSG00000074918	21.1607	15.0784	-0.488502	5.84023	5.10623	0.0238401	0.189803	protein_coding
Pla2g16	ENSMUSG00000060675	13.902	19.7806	0.508171	6.7009	5.10231	0.0238941	0.19013	protein_coding
Gins2	ENSMUSG00000031821	2.46858	4.20513	0.764522	3.7016	5.0984	0.0239479	0.190457	protein_coding
Gpm6a	ENSMUSG00000031517	2.18131	4.05993	0.888467	3.24519	5.09542	0.0239892	0.19062	protein_coding
Gpat3	ENSMUSG00000029314	5.51099	3.65671	-0.587988	4.07219	5.09506	0.023994	0.19062	protein_coding
Eif3l	ENSMUSG00000033047	71.99	100.165	0.476161	7.30101	5.09351	0.0240155	0.190689	protein_coding
S100a11	ENSMUSG00000027907	206.677	294.587	0.511864	6.95061	5.09107	0.0240493	0.190855	protein_coding
Ccdc174	ENSMUSG00000034083	1.52039	2.2831	0.582755	4.07461	5.08916	0.0240758	0.190964	protein_coding
Rpl17	ENSMUSG00000062328	622.939	883.783	0.504542	9.13887	5.0865	0.0241128	0.191063	protein_coding
Sh3d21	ENSMUSG00000073758	1.83848	0.978952	-0.88794	2.06942	5.08464	0.0241386	0.191063	protein_coding
Lcn2	ENSMUSG00000026822	0.637237	1.40931	1.15967	1.39414	5.08324	0.0241582	0.191063	protein_coding
Zfpm1	ENSMUSG00000049577	22.0549	13.9526	-0.657705	6.04542	5.08272	0.0241654	0.191063	protein_coding
Cdc42bpg	ENSMUSG00000024769	3.31078	2.04338	-0.688835	4.10744	5.08041	0.0241977	0.19109	protein_coding
Cds2	ENSMUSG00000058793	18.0151	12.7336	-0.500784	7.1821	5.08032	0.0241989	0.19109	protein_coding
Zbtb39	ENSMUSG00000044617	2.1497	1.26051	-0.763947	3.43145	5.07972	0.0242073	0.19109	protein_coding
Hlcs	ENSMUSG00000040820	2.26828	1.37621	-0.709707	3.29282	5.07369	0.0242917	0.19164	protein_coding
Ano8	ENSMUSG00000034863	3.90653	2.59062	-0.587126	4.54052	5.0729	0.0243028	0.19164	protein_coding
Efnb2	ENSMUSG00000001300	6.71039	4.52415	-0.565568	5.32667	5.06837	0.0243662	0.192039	protein_coding
1500015O10Rik	ENSMUSG00000026051	3.09556	5.44059	0.806499	1.89846	5.06673	0.0243894	0.19212	protein_coding
Sox12	ENSMUSG00000051817	31.8532	22.3401	-0.510918	6.96608	5.06479	0.0244167	0.192192	protein_coding
Rps23	ENSMUSG00000049517	450.583	634.422	0.493516	8.63053	5.06424	0.0244244	0.192192	protein_coding
Medag	ENSMUSG00000029659	0.61257	1.08792	0.83566	1.71776	5.06141	0.0244643	0.192404	protein_coding
Eny2	ENSMUSG00000022338	22.1093	31.0604	0.489205	5.9654	5.05958	0.0244902	0.192459	protein_coding
Washc1	ENSMUSG00000024101	17.2377	12.1313	-0.504509	5.50768	5.05909	0.0244972	0.192459	protein_coding
Sh3pxd2b	ENSMUSG00000040711	3.94633	2.59461	-0.600627	5.05288	5.05562	0.0245462	0.192743	protein_coding
Myl9	ENSMUSG00000067818	502.791	899.82	0.839707	9.58656	5.05291	0.0245846	0.192942	protein_coding
Fbxw4	ENSMUSG00000040913	7.9702	5.40963	-0.555654	4.46348	5.05039	0.0246204	0.193051	protein_coding
Atn1	ENSMUSG00000004263	1.78247	0.996604	-0.820461	2.78373	5.04977	0.0246292	0.193051	protein_coding
Cacna1h	ENSMUSG00000024112	5.15827	3.59541	-0.518603	5.47179	5.0492	0.0246374	0.193051	protein_coding
Tmem63b	ENSMUSG00000036026	21.1951	14.5427	-0.541765	6.56402	5.04547	0.0246905	0.193193	protein_coding
Rpl36a	ENSMUSG00000079435	140.835	203.481	0.530593	8.10136	5.04487	0.0246989	0.193193	protein_coding
Timm50	ENSMUSG00000003438	21.576	31.2071	0.531982	6.09445	5.0436	0.0247171	0.193193	protein_coding
Mbip	ENSMUSG00000021028	5.92818	10.0925	0.761341	3.52753	5.04337	0.0247204	0.193193	protein_coding
Jarid2	ENSMUSG00000038518	5.82085	4.14524	-0.4887	5.64826	5.04001	0.0247684	0.193466	protein_coding
Nxt2	ENSMUSG00000042271	1.62967	2.78434	0.762792	2.74617	5.03694	0.0248123	0.19366	protein_coding
Ik	ENSMUSG00000024474	47.5571	68.1451	0.518083	6.80009	5.03645	0.0248192	0.19366	protein_coding
Vrk1	ENSMUSG00000021115	5.44049	8.02385	0.557282	4.62351	5.02338	0.0250074	0.195026	protein_coding
Fzd1	ENSMUSG00000044674	8.16097	5.4814	-0.571073	4.90089	5.0215	0.0250345	0.195136	protein_coding
Egr1	ENSMUSG00000038418	9.24841	5.96157	-0.631196	5.15837	5.01909	0.0250693	0.195277	protein_coding
Scarb1	ENSMUSG00000037936	10.1584	6.89857	-0.55609	6.23638	5.01843	0.025079	0.195277	protein_coding
Zfp938	ENSMUSG00000062931	4.31046	7.53483	0.798976	3.58191	5.01485	0.0251309	0.195566	protein_coding
Stau1	ENSMUSG00000039536	12.6708	9.08155	-0.479162	6.09304	5.01405	0.0251424	0.195566	protein_coding
Alg14	ENSMUSG00000039887	7.61867	11.3981	0.577603	4.51859	5.00534	0.0252692	0.19645	protein_coding
Ptprb	ENSMUSG00000020154	4.41462	2.95976	-0.575023	5.51646	5.00325	0.0252997	0.196585	protein_coding
Kcnip2	ENSMUSG00000025221	25.2436	16.7663	-0.592094	6.24924	4.99896	0.0253626	0.196939	protein_coding
Micall1	ENSMUSG00000033039	26.2258	18.9255	-0.470565	7.28804	4.99833	0.0253718	0.196939	protein_coding
Mrpl50	ENSMUSG00000044018	24.1828	36.1737	0.579385	5.93873	4.99332	0.0254454	0.197186	protein_coding
Ptpn4	ENSMUSG00000026384	1.84091	2.75552	0.578893	4.64704	4.99294	0.0254509	0.197186	protein_coding
Cand2	ENSMUSG00000030319	26.3522	19.0848	-0.465319	7.0051	4.99165	0.0254699	0.197186	protein_coding
Mamdc2	ENSMUSG00000033207	1.04375	0.565715	-0.887714	1.56631	4.98504	0.0255673	0.197772	protein_coding
A530095I07Rik	ENSMUSG00000051805	0.917844	1.89231	1.02827	0.26021	4.98472	0.0255722	0.197772	antisense_RNA
Ccnl1	ENSMUSG00000027829	4.57691	6.92726	0.595147	5.05151	4.98205	0.0256117	0.197975	protein_coding
Hectd2	ENSMUSG00000041180	0.519444	1.08088	1.04707	2.75834	4.97961	0.0256478	0.198151	protein_coding
3110045C21Rik	ENSMUSG00000097503	1.39192	0.656082	-1.05677	0.449022	4.97452	0.0257233	0.198631	antisense_RNA
Rufy1	ENSMUSG00000020375	19.0436	13.6651	-0.477973	5.54868	4.96979	0.0257938	0.199073	protein_coding
Spata2l	ENSMUSG00000033594	1.66322	0.878002	-0.896419	2.31742	4.96686	0.0258375	0.199203	protein_coding
Atg2b	ENSMUSG00000041341	3.05295	2.12781	-0.518035	4.7769	4.96274	0.0258991	0.199575	protein_coding
BC031181	ENSMUSG00000036299	30.6185	44.2352	0.528495	5.24177	4.95937	0.0259497	0.199682	protein_coding
Afg1l	ENSMUSG00000038302	11.0477	16.8519	0.606708	5.17894	4.95913	0.0259533	0.199682	protein_coding
Uap1	ENSMUSG00000026670	7.81615	11.1084	0.506469	5.19901	4.95554	0.0260072	0.199993	protein_coding
Sgca	ENSMUSG00000001508	31.0115	21.9385	-0.501357	5.57335	4.95125	0.0260718	0.200387	protein_coding
Myh6	ENSMUSG00000040752	2465.54	1566.35	-0.654485	13.7063	4.94888	0.0261076	0.200464	protein_coding
Itga1	ENSMUSG00000042284	5.26987	9.89523	0.907249	5.41338	4.94874	0.0261097	0.200464	protein_coding
Itgb1bp2	ENSMUSG00000031312	61.8491	90.8841	0.554726	7.04691	4.94791	0.0261222	0.200464	protein_coding
Sumo2	ENSMUSG00000020738	39.2485	58.1795	0.566482	6.34601	4.94701	0.0261359	0.200465	protein_coding
Nostrin	ENSMUSG00000034738	6.52029	10.0676	0.62237	3.91232	4.94532	0.0261614	0.200558	protein_coding
Kif21a	ENSMUSG00000022629	1.48964	2.25741	0.599143	3.55203	4.94275	0.0262004	0.200752	protein_coding
Hpgd	ENSMUSG00000031613	2.29528	3.86914	0.759098	2.33306	4.94008	0.0262409	0.200959	protein_coding
A430105I19Rik	ENSMUSG00000045838	3.13628	2.0279	-0.62451	3.69969	4.93779	0.0262756	0.20099	protein_coding
Rpl35a	ENSMUSG00000060636	63.4385	92.6015	0.545345	8.04928	4.93608	0.0263016	0.20099	protein_coding
Rpl11	ENSMUSG00000059291	151.99	216.291	0.508845	8.90499	4.93515	0.0263158	0.20099	protein_coding
Zfp628	ENSMUSG00000074406	6.80498	4.27503	-0.663588	4.36061	4.93508	0.0263169	0.20099	protein_coding
Slc38a4	ENSMUSG00000022464	22.5813	36.846	0.705411	6.80515	4.93299	0.0263487	0.20099	protein_coding
Brd4	ENSMUSG00000024002	8.77699	5.89732	-0.571338	6.00437	4.93283	0.0263512	0.20099	protein_coding
Lrrn4	ENSMUSG00000043110	1.08634	2.77522	1.34685	2.72584	4.93276	0.0263523	0.20099	protein_coding
Acox3	ENSMUSG00000029098	3.56756	2.53661	-0.490409	5.18871	4.93272	0.0263529	0.20099	protein_coding
Kcnn1	ENSMUSG00000002908	2.9281	1.86908	-0.653939	3.53607	4.92697	0.0264406	0.201466	protein_coding
Wdr91	ENSMUSG00000058486	5.09752	3.31164	-0.615445	4.35925	4.9267	0.0264448	0.201466	protein_coding
Lpar6	ENSMUSG00000033446	2.27964	3.47821	0.606138	3.90582	4.92354	0.0264931	0.201466	protein_coding
Rps17	ENSMUSG00000061787	335.606	494.626	0.559399	8.9906	4.92332	0.0264966	0.201466	protein_coding
Arhgef6	ENSMUSG00000031133	6.04292	8.62043	0.510855	5.92062	4.92179	0.02652	0.201493	protein_coding
Atf3	ENSMUSG00000026628	6.07061	14.0421	1.20706	4.31841	4.92112	0.0265303	0.201493	protein_coding
Prkag2	ENSMUSG00000028944	22.123	15.9124	-0.475265	6.99289	4.92044	0.0265407	0.201493	protein_coding
S100a13	ENSMUSG00000042312	57.4089	82.0392	0.513367	5.59019	4.91842	0.0265718	0.201626	protein_coding
Lpar4	ENSMUSG00000049929	3.4934	6.07672	0.794372	4.26473	4.91641	0.0266027	0.201689	protein_coding
Timm8a1	ENSMUSG00000048007	6.39905	9.77334	0.607839	3.47199	4.91565	0.0266144	0.201689	protein_coding
Ncoa7	ENSMUSG00000039697	0.924167	1.41497	0.611284	3.57501	4.91344	0.0266485	0.201689	protein_coding
Parp4	ENSMUSG00000054509	3.84888	2.59699	-0.562522	4.45978	4.91323	0.0266518	0.201689	protein_coding
Slc12a7	ENSMUSG00000017756	22.7006	16.3378	-0.474339	6.69391	4.91165	0.0266761	0.201689	protein_coding
Fastkd2	ENSMUSG00000025962	4.99901	7.42296	0.567483	5.13431	4.91106	0.0266852	0.201689	protein_coding
Gm11585	ENSMUSG00000082045	1.72671	3.7837	1.10226	0.613586	4.91044	0.0266948	0.201689	processed_pseudogene
Rilp	ENSMUSG00000038195	20.219	13.6199	-0.565215	4.80505	4.91033	0.0266965	0.201689	protein_coding
Cox6a2	ENSMUSG00000030785	1075.14	1650.2	0.61801	9.79371	4.90983	0.0267043	0.201689	protein_coding
Scrn2	ENSMUSG00000020877	9.18195	6.23542	-0.557278	4.0463	4.90884	0.0267196	0.201689	protein_coding
Hfe2	ENSMUSG00000038403	39.3938	26.6058	-0.563989	6.12201	4.90822	0.0267292	0.201689	protein_coding
Fat4	ENSMUSG00000046743	1.19784	0.75952	-0.654291	4.14317	4.90555	0.0267705	0.201898	protein_coding
Rpl4	ENSMUSG00000032399	487.862	694.375	0.509197	10.1611	4.90102	0.0268409	0.202326	protein_coding
Pnmal2	ENSMUSG00000070802	3.2662	2.03205	-0.67485	3.53941	4.89217	0.0269787	0.202935	protein_coding
Sdc3	ENSMUSG00000025743	16.4727	11.2325	-0.550771	6.43009	4.89207	0.0269803	0.202935	protein_coding
Clspn	ENSMUSG00000042489	1.31447	2.07659	0.656671	3.54915	4.89171	0.0269859	0.202935	protein_coding
Comp	ENSMUSG00000031849	2.20535	1.0607	-1.0414	2.41517	4.89141	0.0269907	0.202935	protein_coding
Grip2	ENSMUSG00000030098	3.02334	2.08545	-0.534012	4.63798	4.89059	0.0270034	0.202935	protein_coding
Gm14964	ENSMUSG00000052188	1.07886	0.427106	-1.38768	-0.453164	4.88963	0.0270184	0.202945	antisense_RNA
Bend3	ENSMUSG00000038214	2.47619	1.64227	-0.589874	3.88039	4.88577	0.027079	0.203285	protein_coding
Lin7c	ENSMUSG00000027162	8.67432	13.2127	0.604699	5.56928	4.885	0.027091	0.203285	protein_coding
Ceacam1	ENSMUSG00000074272	1.44172	2.55969	0.834761	3.47385	4.88301	0.0271223	0.203417	protein_coding
Col6a6	ENSMUSG00000043719	2.86076	1.90041	-0.584524	4.51313	4.87987	0.0271716	0.203684	protein_coding
Wdr25	ENSMUSG00000040877	1.32968	0.800217	-0.732494	2.33144	4.87444	0.0272573	0.204204	protein_coding
Pm20d1	ENSMUSG00000042251	1.40844	0.772664	-0.850396	3.04553	4.87374	0.0272683	0.204204	protein_coding
Pnn	ENSMUSG00000020994	11.2639	16.95	0.587642	5.55593	4.86914	0.0273411	0.204645	protein_coding
D2hgdh	ENSMUSG00000073609	5.33522	3.67709	-0.537902	4.33021	4.86611	0.0273891	0.204731	protein_coding
Exosc8	ENSMUSG00000027752	4.08419	6.50685	0.668738	4.45701	4.86582	0.0273938	0.204731	protein_coding
Plxnd1	ENSMUSG00000030123	36.7213	22.5004	-0.706026	7.82464	4.86227	0.0274502	0.205049	protein_coding
Ranbp1	ENSMUSG00000005732	45.5885	63.8554	0.48554	6.46281	4.86046	0.027479	0.205162	protein_coding
Ccdc68	ENSMUSG00000038903	0.925759	1.66282	0.847489	1.62681	4.85953	0.0274938	0.205169	protein_coding
Astn2	ENSMUSG00000028373	1.59001	0.955209	-0.722585	2.75593	4.85834	0.0275129	0.205209	protein_coding
Snrk	ENSMUSG00000038145	11.1997	7.59178	-0.558558	5.82076	4.85714	0.0275319	0.205248	protein_coding
Txnl4a	ENSMUSG00000057130	6.31363	9.79798	0.628884	4.07987	4.85524	0.0275624	0.205348	protein_coding
Zfp26	ENSMUSG00000063108	0.990385	1.62914	0.713154	4.14421	4.85458	0.0275729	0.205348	protein_coding
Phf8	ENSMUSG00000041229	1.91806	1.26491	-0.598184	3.95905	4.85329	0.0275935	0.205383	protein_coding
Zdhhc8	ENSMUSG00000060166	13.4649	9.06735	-0.567601	5.8356	4.85255	0.0276053	0.205383	protein_coding
Zfp827	ENSMUSG00000071064	3.58757	2.52728	-0.504289	4.82824	4.85064	0.0276358	0.205446	protein_coding
Pomk	ENSMUSG00000037251	3.37945	2.1911	-0.619914	3.40777	4.85024	0.0276422	0.205446	protein_coding
Wdr81	ENSMUSG00000045374	2.43672	1.44071	-0.74763	3.85666	4.84944	0.0276552	0.205446	protein_coding
Ipo5	ENSMUSG00000030662	33.1246	48.1385	0.538777	7.48954	4.84752	0.0276859	0.205572	protein_coding
Dhx34	ENSMUSG00000006019	3.57402	2.17364	-0.706874	3.80638	4.84628	0.0277058	0.205614	protein_coding
Dctn1	ENSMUSG00000031865	27.376	18.7529	-0.544776	7.28421	4.84544	0.0277193	0.205614	protein_coding
Specc1l	ENSMUSG00000033444	11.4909	8.33418	-0.463184	5.96004	4.83948	0.0278153	0.205974	protein_coding
Plekha6	ENSMUSG00000041757	3.11082	2.21341	-0.49174	5.11226	4.83926	0.0278189	0.205974	protein_coding
Zmynd8	ENSMUSG00000039671	4.98407	3.52319	-0.498528	5.60453	4.83832	0.0278339	0.205974	protein_coding
Nat9	ENSMUSG00000015542	7.80217	5.23321	-0.576781	3.81903	4.83733	0.02785	0.205974	protein_coding
Myh14	ENSMUSG00000030739	1.17832	0.601903	-0.952231	2.8168	4.83556	0.0278787	0.205974	protein_coding
Rpl5	ENSMUSG00000058558	156.396	227.826	0.542633	9.50215	4.83337	0.027914	0.205974	protein_coding
Etl4	ENSMUSG00000036617	1.8827	1.10244	-0.765929	4.66525	4.8331	0.0279183	0.205974	protein_coding
Grik5	ENSMUSG00000003378	5.68757	3.88398	-0.54591	4.68898	4.83208	0.027935	0.205982	protein_coding
Rab11b	ENSMUSG00000077450	38.8942	26.0889	-0.575292	7.68963	4.83056	0.0279595	0.206061	protein_coding
Zbtb4	ENSMUSG00000018750	5.87142	4.13139	-0.506064	5.3967	4.82597	0.0280341	0.206509	protein_coding
Sdcbp	ENSMUSG00000028249	24.4025	36.2734	0.571316	7.65335	4.82476	0.0280538	0.206552	protein_coding
Wnt5b	ENSMUSG00000030170	3.05805	1.74424	-0.791954	2.7779	4.82221	0.0280953	0.206731	protein_coding
Vps35	ENSMUSG00000031696	13.243	20.3181	0.61675	7.16074	4.82156	0.0281059	0.206731	protein_coding
Capza1	ENSMUSG00000070372	17.5669	27.1876	0.628733	6.34018	4.8154	0.0282065	0.207178	protein_coding
Gm45012	ENSMUSG00000109052	1.55543	0.776343	-0.98182	1.13756	4.81401	0.0282292	0.207178	antisense_RNA
Tmem144	ENSMUSG00000027956	3.87485	6.04956	0.638704	4.05368	4.81397	0.0282299	0.207178	protein_coding
Vps13d	ENSMUSG00000020220	3.23495	2.32301	-0.478982	6.15385	4.81228	0.0282577	0.207178	protein_coding
Zfp40	ENSMUSG00000002617	1.66479	2.84132	0.766348	3.27223	4.81208	0.0282609	0.207178	protein_coding
S100a6	ENSMUSG00000001025	9.51704	15.4316	0.702108	4.03389	4.81113	0.0282764	0.207178	protein_coding
E530011L22Rik	ENSMUSG00000097820	1.26595	0.774423	-0.706393	2.52795	4.81103	0.0282781	0.207178	antisense_RNA
Minos1	ENSMUSG00000050608	54.3888	77.4363	0.509222	7.45955	4.80799	0.0283281	0.207274	protein_coding
Vamp7	ENSMUSG00000051412	7.31561	11.6518	0.667097	4.52297	4.80769	0.0283331	0.207274	protein_coding
Mxi1	ENSMUSG00000025025	13.8819	9.57349	-0.537332	6.09663	4.80533	0.0283719	0.207399	protein_coding
Ncoa1	ENSMUSG00000020647	6.44823	4.64091	-0.474366	5.39462	4.80496	0.028378	0.207399	protein_coding
Enpp3	ENSMUSG00000019989	1.58466	2.70004	0.778405	2.5465	4.80324	0.0284063	0.207421	protein_coding
Zxdc	ENSMUSG00000034430	3.83192	2.68715	-0.509489	4.8058	4.8016	0.0284333	0.207421	protein_coding
S1pr3	ENSMUSG00000067586	9.28476	6.27242	-0.562441	5.18396	4.80077	0.028447	0.207421	protein_coding
Ppp1r14c	ENSMUSG00000040653	138.101	99.8669	-0.46778	8.32867	4.8001	0.0284581	0.207421	protein_coding
Mrpl20	ENSMUSG00000029066	27.9725	38.6477	0.466191	5.74799	4.79756	0.0285	0.207421	protein_coding
Irgq	ENSMUSG00000041037	7.31517	4.73501	-0.623774	5.26111	4.79733	0.0285039	0.207421	protein_coding
Ubc	ENSMUSG00000008348	63.3279	42.7811	-0.564902	7.31794	4.79727	0.0285049	0.207421	protein_coding
Cluh	ENSMUSG00000020741	54.9017	37.2486	-0.559206	8.28163	4.79656	0.0285165	0.207421	protein_coding
Adam12	ENSMUSG00000054555	0.774848	1.29633	0.749004	3.39539	4.79539	0.028536	0.207421	protein_coding
Rara	ENSMUSG00000037992	13.2249	8.46717	-0.63963	5.63113	4.79469	0.0285475	0.207421	protein_coding
Abca7	ENSMUSG00000035722	2.9169	1.88388	-0.622824	4.09065	4.79443	0.028552	0.207421	protein_coding
Ergic2	ENSMUSG00000030304	7.60874	11.0385	0.534975	5.91847	4.79352	0.0285669	0.207421	protein_coding
Ly6a	ENSMUSG00000075602	15.1338	21.9173	0.533355	4.43337	4.7919	0.0285939	0.207421	protein_coding
Sacm1l	ENSMUSG00000025240	13.1005	18.9372	0.52971	5.85213	4.79162	0.0285985	0.207421	protein_coding
Flt1	ENSMUSG00000029648	4.64631	3.13807	-0.564579	5.77382	4.79045	0.028618	0.207421	protein_coding
Myrf	ENSMUSG00000036098	0.605222	1.18585	0.966097	2.8623	4.78813	0.0286566	0.2076	protein_coding
Cyp4b1	ENSMUSG00000028713	1.8791	3.76938	1.014	2.60616	4.78611	0.0286902	0.207742	protein_coding
Hacd2	ENSMUSG00000035376	3.10488	4.8228	0.640537	3.78472	4.78359	0.0287322	0.207945	protein_coding
Yap1	ENSMUSG00000053110	11.8982	8.63475	-0.462192	6.61734	4.78066	0.0287812	0.208067	protein_coding
Arel1	ENSMUSG00000042350	11.607	8.38715	-0.470265	5.96521	4.77979	0.0287957	0.208067	protein_coding
B3gnt3	ENSMUSG00000031803	4.2341	2.69709	-0.643511	3.48263	4.77923	0.0288049	0.208067	protein_coding
Fam110b	ENSMUSG00000049119	1.69993	1.06878	-0.660576	3.57883	4.77507	0.0288747	0.208136	protein_coding
Dido1	ENSMUSG00000038914	3.68138	2.59243	-0.504846	5.43662	4.77489	0.0288776	0.208136	protein_coding
Dnph1	ENSMUSG00000040658	4.00808	6.91963	0.782058	2.53295	4.77448	0.0288845	0.208136	protein_coding
Rasl11b	ENSMUSG00000049907	18.3245	27.476	0.582468	5.57253	4.77315	0.0289069	0.208197	protein_coding
Pak1ip1	ENSMUSG00000038683	8.99638	12.4521	0.467886	5.39605	4.7697	0.0289648	0.208508	protein_coding
Lamb2	ENSMUSG00000052911	30.5645	21.6539	-0.496546	7.36057	4.76891	0.0289781	0.208508	protein_coding
Plxnb2	ENSMUSG00000036606	34.0799	24.2429	-0.490797	7.74637	4.76645	0.0290196	0.208695	protein_coding
Adam11	ENSMUSG00000020926	3.49592	2.36069	-0.562748	4.11853	4.76571	0.0290322	0.208695	protein_coding
Zswim4	ENSMUSG00000035671	7.93868	5.56703	-0.509969	5.01996	4.76268	0.0290833	0.208961	protein_coding
BC055324	ENSMUSG00000041406	1.09358	1.89886	0.788131	2.56804	4.76075	0.0291158	0.209038	protein_coding
Enpp6	ENSMUSG00000038173	2.03282	1.31962	-0.630269	3.49994	4.76039	0.029122	0.209038	protein_coding
Fbrsl1	ENSMUSG00000043323	6.44015	4.40421	-0.545005	5.51015	4.75933	0.0291399	0.209066	protein_coding
Msra	ENSMUSG00000054733	8.09351	11.4952	0.504829	5.34637	4.75652	0.0291875	0.209237	protein_coding
Tox2	ENSMUSG00000074607	1.42912	0.759532	-0.891586	2.02574	4.75626	0.029192	0.209237	protein_coding
Gm15934	ENSMUSG00000090088	6.91985	11.5397	0.72995	2.22774	4.75223	0.0292603	0.209598	antisense_RNA
Oasl2	ENSMUSG00000029561	1.0309	1.61821	0.651473	3.0315	4.75135	0.0292753	0.209598	protein_coding
Ugp2	ENSMUSG00000001891	63.9594	91.9961	0.524022	7.85035	4.74998	0.0292986	0.209598	protein_coding
Nudcd2	ENSMUSG00000020328	12.9594	18.3435	0.500836	4.96018	4.74385	0.0294031	0.209927	protein_coding
Mcpt4	ENSMUSG00000061068	3.03232	7.31246	1.27574	2.2852	4.74298	0.029418	0.209927	protein_coding
Lgals7	ENSMUSG00000053522	1.63461	3.98384	1.29047	1.34674	4.74297	0.0294183	0.209927	protein_coding
Phldb1	ENSMUSG00000048537	18.2174	12.9229	-0.494391	6.85434	4.74233	0.0294292	0.209927	protein_coding
Papd4	ENSMUSG00000042167	9.56952	13.6937	0.515672	4.3998	4.74099	0.0294521	0.209989	protein_coding
Fkbp3	ENSMUSG00000020949	156.994	250.899	0.675891	7.52601	4.73922	0.0294825	0.210056	protein_coding
Stim1	ENSMUSG00000030987	2.9032	1.99238	-0.540719	4.72571	4.73797	0.0295038	0.210056	protein_coding
Kdm2b	ENSMUSG00000029475	2.5129	1.72868	-0.536379	4.58632	4.73797	0.0295039	0.210056	protein_coding
Shc2	ENSMUSG00000020312	1.0253	0.615367	-0.737621	2.28684	4.7369	0.0295222	0.210086	protein_coding
Sf3a3	ENSMUSG00000028902	12.2877	17.064	0.472834	5.30847	4.73539	0.0295482	0.210118	protein_coding
Pon3	ENSMUSG00000029759	6.41368	9.22984	0.522149	4.67829	4.73388	0.029574	0.210118	protein_coding
Rpl31-ps8	ENSMUSG00000067870	13.4657	23.8558	0.825573	2.75834	4.73175	0.0296107	0.210118	processed_pseudogene
Pex13	ENSMUSG00000020283	8.60125	12.4894	0.536267	5.56225	4.73117	0.0296207	0.210118	protein_coding
Ly96	ENSMUSG00000025779	1.52633	3.01713	0.96649	1.17354	4.73102	0.0296233	0.210118	protein_coding
Prkaca	ENSMUSG00000005469	186.409	130.956	-0.509094	8.67498	4.72943	0.0296507	0.210118	protein_coding
Rpl35a-ps4	ENSMUSG00000083424	0.597462	1.80411	1.50378	-1.12915	4.72843	0.0296679	0.210118	processed_pseudogene
Tomm7	ENSMUSG00000028998	64.8168	93.2165	0.523108	6.42242	4.72646	0.029702	0.21026	protein_coding
Dcps	ENSMUSG00000032040	18.3598	26.2903	0.515976	4.96923	4.72301	0.0297615	0.210578	protein_coding
Plscr2	ENSMUSG00000032372	1.97491	3.63268	0.871596	3.0802	4.72222	0.0297753	0.210578	protein_coding
Tbc1d19	ENSMUSG00000039178	4.9889	7.92083	0.662292	4.26821	4.71867	0.0298369	0.210853	protein_coding
Trim26	ENSMUSG00000024457	3.44711	2.31174	-0.570761	4.37036	4.71834	0.0298425	0.210853	protein_coding
Papln	ENSMUSG00000021223	1.73901	0.956216	-0.8527	3.0275	4.71357	0.0299255	0.211239	protein_coding
Fam43a	ENSMUSG00000046546	12.5666	7.85837	-0.673742	5.0434	4.70746	0.030032	0.211731	protein_coding
Ccdc88a	ENSMUSG00000032740	2.17778	3.50251	0.68209	4.88433	4.70628	0.0300527	0.211731	protein_coding
Mreg	ENSMUSG00000039395	4.23006	2.69368	-0.650482	3.06573	4.7055	0.0300663	0.211731	protein_coding
Casz1	ENSMUSG00000028977	5.53534	3.91887	-0.496682	5.90402	4.70549	0.0300664	0.211731	protein_coding
Atf7	ENSMUSG00000099083	3.85655	2.59559	-0.56783	5.20812	4.7023	0.0301223	0.211924	protein_coding
Fam214b	ENSMUSG00000036002	9.42733	6.70363	-0.490138	5.1106	4.69794	0.0301989	0.212362	protein_coding
Nomo1	ENSMUSG00000030835	15.588	11.1819	-0.477808	6.36094	4.69703	0.0302148	0.212374	protein_coding
Tmem25	ENSMUSG00000002032	1.14718	0.648903	-0.82449	1.65766	4.69285	0.0302883	0.212712	protein_coding
Pak6	ENSMUSG00000074923	5.42914	3.56682	-0.601596	4.61648	4.69247	0.0302951	0.212712	protein_coding
Tha1	ENSMUSG00000017713	3.26317	1.97935	-0.708833	3.0243	4.69116	0.0303182	0.212712	protein_coding
Ptgds	ENSMUSG00000015090	86.908	122.268	0.491933	7.3812	4.69014	0.0303361	0.212724	protein_coding
Cox20	ENSMUSG00000026500	80.0647	117.329	0.550116	6.39103	4.68816	0.0303711	0.212742	protein_coding
Hexa	ENSMUSG00000025232	28.5684	19.6219	-0.53988	5.64428	4.68757	0.0303815	0.212742	protein_coding
Ap3m1	ENSMUSG00000021824	8.59513	12.361	0.522711	6.1483	4.68628	0.0304044	0.212754	protein_coding
Atp13a2	ENSMUSG00000036622	9.996	6.53556	-0.609635	5.69524	4.68528	0.0304222	0.212754	protein_coding
Slc25a24	ENSMUSG00000040322	5.83601	8.43899	0.530345	4.56521	4.68369	0.0304502	0.212822	protein_coding
Myom2	ENSMUSG00000031461	85.429	51.3884	-0.73346	9.31259	4.67985	0.0305185	0.212997	protein_coding
Kif18b	ENSMUSG00000051378	2.92722	5.04456	0.788899	3.76353	4.67969	0.0305212	0.212997	protein_coding
Stt3a	ENSMUSG00000032116	6.65722	9.08289	0.447432	6.09462	4.67912	0.0305313	0.212997	protein_coding
Ctxn1	ENSMUSG00000048644	13.3544	8.23007	-0.68911	3.79102	4.67703	0.0305686	0.213069	protein_coding
Dvl3	ENSMUSG00000003233	9.46683	6.65023	-0.507981	5.35671	4.67687	0.0305714	0.213069	protein_coding
Uqcrc2	ENSMUSG00000030884	320.551	471.993	0.558128	9.92586	4.67253	0.0306488	0.213508	protein_coding
Carmil3	ENSMUSG00000022211	2.16177	1.29153	-0.745422	3.07562	4.67097	0.0306766	0.213565	protein_coding
Akr1c14	ENSMUSG00000033715	1.3723	2.28556	0.727799	2.38914	4.66957	0.0307017	0.213571	protein_coding
Gm29188	ENSMUSG00000099622	0.496674	1.33747	1.36927	-0.498529	4.66879	0.0307155	0.213571	lincRNA
Fbxo30	ENSMUSG00000047648	4.51015	6.77793	0.585311	4.81881	4.66801	0.0307295	0.213571	protein_coding
Gla	ENSMUSG00000031266	1.29799	2.19431	0.747339	2.45559	4.66449	0.0307925	0.213809	protein_coding
1500009L16Rik	ENSMUSG00000087651	4.0397	6.70773	0.726437	2.62434	4.65958	0.0308807	0.213827	protein_coding
Alkbh5	ENSMUSG00000042650	19.3754	13.9659	-0.471596	6.6888	4.65929	0.0308859	0.213827	protein_coding
Osbp	ENSMUSG00000024687	27.561	19.9649	-0.464705	6.81225	4.6589	0.030893	0.213827	protein_coding
Atxn2	ENSMUSG00000042605	4.52208	3.024	-0.577669	5.9468	4.65624	0.030941	0.213827	protein_coding
Sik1	ENSMUSG00000024042	7.78477	5.50734	-0.500224	4.95971	4.65609	0.0309436	0.213827	protein_coding
Kdelr3	ENSMUSG00000010830	18.2541	25.8068	0.501628	4.91609	4.65603	0.0309446	0.213827	protein_coding
Dtl	ENSMUSG00000037474	0.699442	1.33428	0.927041	3.70979	4.65588	0.0309474	0.213827	protein_coding
Synj2	ENSMUSG00000023805	3.76242	2.65142	-0.504695	4.79651	4.65556	0.0309532	0.213827	protein_coding
Thap6	ENSMUSG00000102644	1.60193	0.974816	-0.724953	2.50422	4.65425	0.0309768	0.213891	transcribed_unitary_pseudogene
Smu1	ENSMUSG00000028409	20.279	28.2906	0.479128	6.19627	4.64992	0.0310549	0.214331	protein_coding
Mrps21	ENSMUSG00000054312	85.9886	122.818	0.513071	6.21927	4.64725	0.0311034	0.214423	protein_coding
Gm45138	ENSMUSG00000108658	1.08353	0.490355	-1.10026	0.215094	4.647	0.0311078	0.214423	TEC
Grpel1	ENSMUSG00000029198	32.827	45.8411	0.481392	7.0689	4.6468	0.0311115	0.214423	protein_coding
Mark4	ENSMUSG00000030397	12.3412	8.42504	-0.547521	5.6562	4.6428	0.031184	0.214823	protein_coding
Sh3kbp1	ENSMUSG00000040990	23.4968	34.8961	0.570309	8.14684	4.64133	0.0312108	0.214908	protein_coding
Prpf40a	ENSMUSG00000061136	5.38362	7.74488	0.522971	6.04981	4.63661	0.0312967	0.2154	protein_coding
Cdk4	ENSMUSG00000006728	53.4834	75.6813	0.50047	7.66313	4.63433	0.0313383	0.215587	protein_coding
Rpl19	ENSMUSG00000017404	258.608	361.012	0.481077	8.25855	4.63302	0.0313622	0.215652	protein_coding
Gm7429	ENSMUSG00000082260	2.2043	0.525607	-1.98508	-0.647742	4.62883	0.031439	0.216031	processed_pseudogene
Fam219a	ENSMUSG00000028439	4.98781	3.22559	-0.621655	4.0069	4.62477	0.0315135	0.216156	protein_coding
Sltm	ENSMUSG00000032212	3.93578	5.73389	0.54095	5.71609	4.62434	0.0315213	0.216156	protein_coding
Psmc6	ENSMUSG00000021832	74.3633	109.967	0.563592	7.11525	4.6231	0.0315442	0.216156	protein_coding
Mcm6	ENSMUSG00000026355	12.2011	17.886	0.55061	6.079	4.62262	0.031553	0.216156	protein_coding
Casp3	ENSMUSG00000031628	12.5754	17.7304	0.493702	5.62094	4.62209	0.0315628	0.216156	protein_coding
Gm43860	ENSMUSG00000106928	1.51896	0.837626	-0.838893	1.8047	4.62187	0.0315667	0.216156	TEC
Mrpl30	ENSMUSG00000026087	34.1027	48.9024	0.519318	7.01336	4.61935	0.0316133	0.216156	protein_coding
Gxylt2	ENSMUSG00000030074	1.37419	0.806298	-0.769395	3.30614	4.61858	0.0316274	0.216156	protein_coding
Rplp0	ENSMUSG00000067274	856.448	1222.97	0.513909	10.7006	4.61785	0.0316409	0.216156	protein_coding
Fgd5	ENSMUSG00000034037	7.17069	4.70861	-0.602896	5.28731	4.6163	0.0316695	0.216156	protein_coding
Chka	ENSMUSG00000024843	1.17152	1.71151	0.54881	4.06999	4.61597	0.0316755	0.216156	protein_coding
Serpinb1a	ENSMUSG00000044734	4.79412	7.17494	0.584798	3.49505	4.61367	0.031718	0.216156	protein_coding
Gtpbp4	ENSMUSG00000021149	12.5452	18.2238	0.536456	5.46554	4.61366	0.0317184	0.216156	protein_coding
Tcaf2	ENSMUSG00000029851	0.733041	1.25481	0.776289	2.19743	4.61356	0.0317202	0.216156	protein_coding
Cav1	ENSMUSG00000007655	134.715	200.026	0.570102	9.11371	4.61336	0.0317238	0.216156	protein_coding
Erh	ENSMUSG00000021131	43.3042	61.6069	0.507293	6.0963	4.61264	0.0317372	0.216156	protein_coding
Mmp19	ENSMUSG00000025355	0.994638	1.75866	0.82866	2.18842	4.61194	0.0317501	0.216156	protein_coding
Lrrc8a	ENSMUSG00000007476	5.87351	3.77211	-0.631594	4.44748	4.61167	0.0317551	0.216156	protein_coding
Taldo1	ENSMUSG00000025503	51.9977	73.1757	0.493578	7.03771	4.6075	0.0318324	0.216484	protein_coding
Msln	ENSMUSG00000063011	7.63132	19.3423	1.3406	4.70734	4.6012	0.0319497	0.217182	protein_coding
Rpsa-ps10	ENSMUSG00000047676	5.1721	8.61411	0.730267	2.55291	4.59906	0.0319894	0.217353	processed_pseudogene
Tmem131l	ENSMUSG00000033767	3.09882	2.13819	-0.531364	4.99807	4.59819	0.0320056	0.217364	protein_coding
Usp2	ENSMUSG00000032010	18.536	12.4592	-0.570935	6.28035	4.59608	0.0320451	0.217397	protein_coding
Rnf2	ENSMUSG00000026484	12.3565	19.1851	0.632865	5.96157	4.59571	0.032052	0.217397	protein_coding
Agtr1a	ENSMUSG00000049115	12.1703	8.66992	-0.489185	4.73794	4.59559	0.0320543	0.217397	protein_coding
Dym	ENSMUSG00000035765	16.8875	12.0803	-0.480897	5.21337	4.59331	0.0320969	0.217533	protein_coding
Cxx1b	ENSMUSG00000067924	41.5112	27.6642	-0.581757	5.47414	4.591	0.0321402	0.217682	protein_coding
Nrk	ENSMUSG00000052854	5.72082	8.27359	0.530608	5.95784	4.5887	0.0321834	0.217875	protein_coding
Actl6a	ENSMUSG00000027671	9.74401	13.553	0.474498	5.45504	4.57907	0.0323647	0.219003	protein_coding
Mt2	ENSMUSG00000031762	50.8466	84.826	0.73762	5.24784	4.57487	0.0324442	0.219441	protein_coding
Lactb2	ENSMUSG00000025937	4.67035	6.55206	0.488917	4.63555	4.57049	0.0325272	0.219902	protein_coding
Gm24187	ENSMUSG00000088609	232.368	141.953	-0.709412	3.49814	4.56906	0.0325543	0.219986	miRNA
Lrrc49	ENSMUSG00000047766	1.79808	2.65786	0.56135	3.76608	4.56189	0.032691	0.220809	protein_coding
Map2k3os	ENSMUSG00000042549	3.69264	2.10058	-0.798012	2.02658	4.55647	0.0327946	0.221308	antisense_RNA
Fcgr4	ENSMUSG00000059089	0.616906	1.3642	1.14398	0.345606	4.55425	0.032837	0.221377	protein_coding
Cycs	ENSMUSG00000063694	108.75	161.845	0.573407	8.78966	4.55419	0.0328384	0.221377	protein_coding
Cd300lg	ENSMUSG00000017309	22.3449	15.3474	-0.539012	5.74491	4.55284	0.0328642	0.221377	protein_coding
Rbm7	ENSMUSG00000042396	7.11199	9.79666	0.460773	5.34101	4.55283	0.0328644	0.221377	protein_coding
Fam53b	ENSMUSG00000030956	5.53577	3.48285	-0.663432	5.03206	4.54931	0.0329319	0.221532	protein_coding
Six5	ENSMUSG00000040841	9.73609	6.69759	-0.535538	4.68665	4.54839	0.0329497	0.221532	protein_coding
Tln2	ENSMUSG00000052698	10.2932	7.47812	-0.461298	7.39565	4.54804	0.0329565	0.221532	protein_coding
1700025G04Rik	ENSMUSG00000032666	3.81641	5.2238	0.451607	5.69239	4.54776	0.0329619	0.221532	protein_coding
Cep164	ENSMUSG00000043987	2.07125	1.41367	-0.547669	4.18581	4.5464	0.032988	0.221608	protein_coding
Rfc3	ENSMUSG00000033970	3.55068	5.59614	0.651246	3.98486	4.54468	0.0330213	0.221631	protein_coding
Znrd1	ENSMUSG00000036315	15.4538	23.2385	0.583768	3.93361	4.54348	0.0330444	0.221634	protein_coding
Zfp469	ENSMUSG00000043903	1.06758	0.543288	-0.937206	1.47169	4.54311	0.0330514	0.221634	lincRNA
Prickle3	ENSMUSG00000031145	3.17195	2.10312	-0.586223	3.76327	4.54218	0.0330695	0.221655	protein_coding
2310040G24Rik	ENSMUSG00000101655	24.4862	14.9767	-0.714173	4.01308	4.54107	0.0330909	0.221698	lincRNA
Esrra	ENSMUSG00000024955	61.9113	45.2387	-0.452164	7.1332	4.53844	0.0331418	0.22194	protein_coding
Hp	ENSMUSG00000031722	1.13818	2.2027	0.968574	1.40402	4.53634	0.0331824	0.222112	protein_coding
Glo1	ENSMUSG00000024026	37.0952	53.2328	0.519889	6.39816	4.53483	0.0332117	0.22212	protein_coding
Gm28523	ENSMUSG00000100707	1.55376	0.782595	-0.992249	1.0691	4.53474	0.0332135	0.22212	antisense_RNA
Ep300	ENSMUSG00000055024	3.49304	2.3754	-0.554626	5.44627	4.53295	0.0332483	0.222253	protein_coding
Myh7	ENSMUSG00000053093	641.058	1028.71	0.682308	12.7388	4.53101	0.0332859	0.222385	protein_coding
D830024N08Rik	ENSMUSG00000110580	1.40047	2.34742	0.739627	2.39262	4.52816	0.0333415	0.222476	antisense_RNA
Lgals1	ENSMUSG00000068220	377.676	546.418	0.532693	8.47661	4.52685	0.033367	0.222483	protein_coding
Aldh9a1	ENSMUSG00000026687	13.512	9.06716	-0.571515	5.31595	4.52652	0.0333735	0.222483	protein_coding
Map9	ENSMUSG00000033900	1.04338	1.80079	0.778821	3.17406	4.5258	0.0333874	0.222483	protein_coding
Rangrf	ENSMUSG00000032892	16.0466	23.9763	0.576717	4.61209	4.523	0.0334422	0.222688	protein_coding
Id1	ENSMUSG00000042745	36.8913	51.2791	0.473513	5.63098	4.52206	0.0334605	0.222688	protein_coding
Ndufs8	ENSMUSG00000059734	230.238	332.216	0.528749	8.02832	4.52149	0.0334717	0.222688	protein_coding
Trim65	ENSMUSG00000054517	1.32115	0.710442	-0.877221	2.69491	4.52117	0.033478	0.222688	protein_coding
Rpl13a	ENSMUSG00000074129	6.30117	9.25544	0.552354	3.99146	4.51981	0.0335046	0.222765	protein_coding
Ubap2	ENSMUSG00000028433	20.3021	14.5599	-0.478261	6.43603	4.51803	0.0335395	0.222856	protein_coding
Sncaip	ENSMUSG00000024534	5.12906	3.50147	-0.545957	4.34869	4.51714	0.0335568	0.222856	protein_coding
Insr	ENSMUSG00000005534	8.94784	6.06645	-0.562165	6.74487	4.51682	0.0335632	0.222856	protein_coding
Zfp553	ENSMUSG00000045598	5.04058	2.92591	-0.775582	4.07188	4.51318	0.0336346	0.223231	protein_coding
Trnt1	ENSMUSG00000013736	5.98154	8.43573	0.493421	4.94535	4.51052	0.033687	0.223479	protein_coding
Gtpbp2	ENSMUSG00000023952	14.9563	10.9359	-0.450466	6.14839	4.50951	0.0337069	0.223511	protein_coding
Dld	ENSMUSG00000020664	161.647	230.221	0.50995	8.72721	4.50543	0.0337874	0.223834	protein_coding
Stat5a	ENSMUSG00000004043	3.04001	1.8455	-0.711221	4.20306	4.50478	0.0338003	0.223834	protein_coding
Kif13b	ENSMUSG00000060012	1.20395	0.727985	-0.728909	2.5327	4.504	0.0338157	0.223834	protein_coding
Sdk1	ENSMUSG00000039683	1.41864	0.914094	-0.62692	3.76828	4.50178	0.0338595	0.224024	protein_coding
Cma1	ENSMUSG00000022225	10.3942	20.0853	0.952512	3.95286	4.50042	0.0338865	0.224102	protein_coding
Lmod1	ENSMUSG00000048096	1.11947	0.57061	-0.958535	1.88414	4.49959	0.0339029	0.224111	protein_coding
Kcng2	ENSMUSG00000059852	79.5195	57.9235	-0.456764	7.72782	4.49554	0.0339834	0.224544	protein_coding
Iba57	ENSMUSG00000049287	7.21831	4.80328	-0.582361	4.93917	4.49313	0.0340313	0.224652	protein_coding
Stc1	ENSMUSG00000014813	1.2247	2.09259	0.772838	2.58353	4.49226	0.0340486	0.224652	protein_coding
Rai1	ENSMUSG00000062115	6.30027	4.39222	-0.517826	5.73426	4.49092	0.0340753	0.224652	protein_coding
Ube2r2	ENSMUSG00000036241	36.099	25.4718	-0.501964	7.06117	4.48736	0.0341463	0.224943	protein_coding
Fam118a	ENSMUSG00000022434	3.6098	5.36546	0.571835	3.46687	4.4872	0.0341497	0.224943	protein_coding
Kdelc2	ENSMUSG00000034487	7.95893	5.66157	-0.491901	4.68661	4.48639	0.0341657	0.224949	protein_coding
Rpl7a	ENSMUSG00000062647	381.081	531.557	0.480058	9.61836	4.48445	0.0342045	0.225091	protein_coding
Nf2	ENSMUSG00000009073	19.2732	14.1012	-0.450549	6.87691	4.4838	0.0342175	0.225091	protein_coding
Emc2	ENSMUSG00000022337	75.8491	110.722	0.544809	6.80567	4.48073	0.0342791	0.225297	protein_coding
Bahd1	ENSMUSG00000040007	5.74793	3.61518	-0.662226	4.52183	4.47953	0.0343032	0.225308	protein_coding
Asah1	ENSMUSG00000031591	12.8691	18.5893	0.528479	5.68507	4.47914	0.0343109	0.225308	protein_coding
Rhbdd2	ENSMUSG00000039917	3.30044	2.27309	-0.535847	4.45173	4.47138	0.0344672	0.226234	protein_coding
Wnk4	ENSMUSG00000035112	2.18533	1.28926	-0.74502	2.94776	4.46963	0.0345025	0.226365	protein_coding
Fxyd5	ENSMUSG00000009687	5.28918	7.32719	0.470427	4.68301	4.46673	0.034561	0.226551	protein_coding
Mapk11	ENSMUSG00000053137	1.84931	1.01718	-0.855433	1.92947	4.46246	0.0346476	0.226882	protein_coding
Gm13772	ENSMUSG00000080977	7.36982	1.89517	-1.95574	0.795493	4.46223	0.0346522	0.226882	processed_pseudogene
[truncated: 10,026 more rows]

## Sheet: GO_ORA_Upregulated
geneSet	description	link	size	overlap	expect	enrichmentRatio	pValue	FDR	overlapId	userId
GO:0007049	cell cycle	http://amigo.geneontology.org/amigo/term/GO:0007049	1204	144	53.926	2.67032	0	0	11792;11799;12069;12144;12189;12228;12235;12236;12316;12428;12442;12532;12534;12544;12545;12575;12577;12580;12581;12606;12617;12631;13605;13614;14211;14726;14793;15270;16551;16571;16580;16765;16952;17279;17319;17345;17427;18005;18124;18538;18817;18858;19348;19822;20133;20460;20873;20878;21973;21987;22142;22143;22146;26415;26886;26934;27053;27214;30939;50927;51944;52033;52276;52696;54124;54141;543…	Anln;Haus3;Fignl1;Fbxo5;Bex2;Rbbp8;Rnaseh2b;Rrm1;Cep72;Spag5;Cfl1;Smpd3;Melk;Pmp22;Ercc6l;Ncapg;Dsn1;Mis18bp1;Cdkn1a;Iqgap3;Cenph;Sass6;Mns1;Cdk1;Top2a;Smc4;Kif11;Anxa1;Ccnb2;Bub1;Xpo1;Mki67;Cdkn2c;Gmnn;Nusap1;Cdca5;Cenpc1;Sgo2a;Klhl13;Blm;H2afx;Kif18a;Smc2;Cdc45;Chmp4c;Cdc20;Kifc5b;Ska1;Edn1;Pdpn;Spdl1;Pbk;Tuba1b;Kif4;Cep295;Ube2s;Cenpw;Ccnb1;Knstrn;Bora;Mastl;Mad2l1;Nek2;Dbf4;Trip13;Cenpq;Dlgap…
GO:0051301	cell division	http://amigo.geneontology.org/amigo/term/GO:0051301	454	80	20.3342	3.93425	0	0	11799;12144;12235;12236;12316;12428;12442;12532;12534;12545;12617;12631;13605;14211;14793;16551;16571;16765;18005;18817;19348;20878;21828;21973;26934;30939;51944;52276;52696;54124;54141;56150;66197;66311;66371;66442;66468;66934;66977;67052;67121;67141;67455;67629;67849;68014;68549;68612;68743;70099;70385;70645;71819;72119;72415;73804;74107;75786;76044;77744;77891;80986;107995;108907;108912;109212…	Anln;Haus3;Fbxo5;Rbbp8;Spag5;Cfl1;Ercc6l;Dsn1;Mis18bp1;Cdk1;Top2a;Smc4;Kif11;Ccnb2;Bub1;Nusap1;Cdca5;Cenpc1;Sgo2a;Klhl13;Blm;Smc2;Chmp4c;Cdc20;Ska1;Spdl1;Kif4;Ube2s;Cenpw;Ccnb1;Knstrn;Bora;Mastl;Mad2l1;Nek2;Cks2;Cenpj;Ska3;Zbtb16;Cenpe;Ccna2;Kif14;Kif20b;Cdc25c;Bub1b;Cep55;Cdca8;Kif20a;Racgap1;Prc1;Ube2c;Ndc80;Kif23;Kif2c;Cdc7;Zwint;Plk1;Aspm;Spc24;Thbs4;Spc25;Tpx2;Stmn1;Zwilch;Birc5;Sgo1;Nuf2;Cd…
GO:0007017	microtubule-based process	http://amigo.geneontology.org/amigo/term/GO:0007017	521	60	23.3351	2.57123	8.65252e-12	3.29575e-09	11799;12189;12316;12338;16551;16571;16580;16765;18005;18817;19348;19822;20460;20873;20878;22142;22143;22146;26934;51944;54141;60530;66371;66442;66468;66977;67052;67141;67749;68026;70385;71819;72119;72415;72776;73804;74470;75564;75786;77744;78767;80986;103573;107995;108907;110033;209737;219103;219114;227613;228421;229841;231123;232943;233406;237436;240641;268697;319675;381293	Haus3;Fignl1;Fbxo5;Cep72;Spag5;Kif15;Sass6;Kif11;Xpo1;Nusap1;Kif18a;Gas2l3;Chmp4c;Cdc20;Kifc5b;Ska1;Spdl1;Tuba1b;Kif4;Cep295;Ccnb1;Knstrn;Bora;Nek2;Cenpj;Ska3;Cenpe;Tubb4b;Rnf4;Kif14;Mgarp;Kif20b;Brca1;Kif20a;Racgap1;Efcab11;Prc1;Ndc80;Kif23;Tuba1c;Kif2c;Kif22;Klc3;Plk4;Plk1;Aspm;Rsph9;Spc25;Capn6;Tpx2;Stil;Stmn1;Birc5;Sgo1;Nuf2;Aurka;Ckap2;Tuba1a;Ckap5;Pclaf
GO:0051276	chromosome organization	http://amigo.geneontology.org/amigo/term/GO:0051276	816	74	36.5479	2.02474	2.44388e-09	5.31929e-07	11792;11799;12144;12189;12235;12236;12428;12534;12544;12617;14211;15270;15519;16571;16952;17345;17751;18005;18538;18600;18817;19822;20878;21454;21973;26886;26934;30939;50887;50927;51788;51944;52276;52696;53893;54141;54392;56150;56397;58243;60411;66311;66336;66371;66929;66934;66977;67052;67141;67849;68549;69716;70099;70385;70472;70645;71819;71988;72155;72415;73804;76044;97165;102920;107995;108907;…	H2afz;Fbxo5;Hmgb2;Atad2;Asf1b;Spag5;Cenpn;Ncapg;Dsn1;Cenph;Cenpk;Cdk1;Top2a;Smc4;Mt3;Anxa1;Bub1;Mki67;Nusap1;Cdca5;Cenpc1;Sgo2a;Blm;H2afx;Kif18a;Smc2;Cdc45;Chmp4c;Cdc20;Spdl1;Tcp1;Kif4;Cenpw;Ccnb1;Taf9b;Knstrn;Mad2l1;Nek2;Trip13;Fancd2;Cenpi;Pcna;Cenpe;Ccna2;Rnf4;Kif14;Morf4l2;Brca1;Bub1b;Cdca8;Hmgn5;Racgap1;Ndc80;Kif23;Kif2c;Kif22;Zwint;Padi2;Cenpp;Plk1;Nudt5;Birc5;Esco2;Sgo1;Nuf2;Apex1;Nap1l5;N…
GO:0007010	cytoskeleton organization	http://amigo.geneontology.org/amigo/term/GO:0007010	937	81	41.9673	1.93007	3.60753e-09	7.42761e-07	11799;11857;12154;12189;12316;12338;12372;12631;12797;13605;13614;16551;16571;16580;16664;16668;16669;16691;16765;16952;18005;18481;18817;18858;19241;19348;19822;20194;20460;20739;20873;20878;21957;22142;22143;22146;22351;23921;26934;51944;54141;56419;60530;66371;66442;66468;66824;66977;67052;67141;68026;68743;70385;71819;72119;72415;72776;73804;74194;74470;75564;75786;77744;78767;80986;103573;10…	Anln;Haus3;Fignl1;Fbxo5;Vill;Cep72;Spag5;Cfl1;Pmp22;Sass6;Krt19;Kif11;Anxa1;Xpo1;Krt14;Nusap1;Tnnt3;Kif18a;Gas2l3;Chmp4c;Cdc20;Kifc5b;Ska1;Edn1;Aif1l;Spdl1;Tuba1b;Spta1;Tmsb4x;Kif4;Cep295;Cnn1;Ccnb1;Knstrn;Bora;Pak3;Nek2;Cenpj;Ska3;Krt18;Cenpe;Tubb4b;Rnf4;Kif14;Brca1;Arhgdib;Kif20a;Racgap1;Efcab11;Prc1;Ndc80;Kif23;Tuba1c;Kif2c;Plk4;S100a10;Plk1;Rnd3;Aspm;Rsph9;Spc25;Pycard;Capn6;Casq1;Tpx2;Stil;S…
GO:0042493	response to drug	http://amigo.geneontology.org/amigo/term/GO:0042493	629	56	28.1723	1.98777	5.02741e-07	6.07918e-05	11450;11609;11792;11829;12010;12038;12144;12176;12189;12350;12428;12534;12583;12631;12739;13605;13614;14276;14590;14726;14775;14860;14933;15452;15519;16952;17751;18102;18124;18534;19088;19822;19951;20194;20665;22166;22171;26357;26415;27053;54208;56506;56615;57264;58994;67041;67103;67512;70415;103573;107765;209027;246049;268697;268860;100503605	Bche;Cfl1;Smpd3;Cldn3;Ptgr1;Folr2;Pck1;Cdk1;Mt3;Hbb-bs;Anxa1;Adipoq;Xpo1;Blm;Stk26;Nme1;Cib2;Bnip3;Edn1;Ggh;Pdpn;Sox10;Agpat2;Gpx1;Cdo1;Rpl32;Ccnb1;Hprt;Txn1;Ccna2;Tyms;Retn;Rnf4;Aqp4;Nr4a3;Brca1;Ankrd1;B2m;Arl6ip1;Mapk13;Abcg2;S100a10;Mgst1;Pycr1;Car3;Gk;Oxct1;Asns;Apex1;Ect2;Gsta4;Hsp90aa1;Abat;Slc36a2;Prkar2b;Agtr2
GO:0019752	carboxylic acid metabolic process	http://amigo.geneontology.org/amigo/term/GO:0019752	582	53	26.0672	2.0332	5.19129e-07	6.17926e-05	11450;11566;11812;12040;12189;12583;13167;13614;13806;14555;14590;14726;14933;16592;16828;16952;17319;17768;18124;18242;18534;18655;18746;19016;19088;20249;21991;22171;22235;23874;26357;26358;26912;27053;53322;53381;56050;56348;56428;56615;67103;69219;74246;104458;107272;107508;109672;170439;209027;229905;236539;243078;268860	Kyat3;Ptgr1;Pck1;Anxa1;Adipoq;Prdx4;Elovl6;Gale;Nucb2;Edn1;Ggh;Pkm;Pdpn;Adss;Cdo1;Tecrl;Fabp5;Cyp39a1;Gcat;Ldha;Pgk1;Tyms;Mtch2;Rars;Nr4a3;Brca1;Mif;Tpi1;Hsd17b12;Oat;Abcg2;Scd1;Cyb5a;Mgst1;Pycr1;Phgdh;Eno1;Mthfd2;Apoc1;Gk;Psat1;Ugdh;Ddah1;Asns;Bckdhb;Dbi;Pparg;Eprs;Abat;Prkar2b;Gpd1;Farsb;Aldh1a7
GO:0022414	reproductive process	http://amigo.geneontology.org/amigo/term/GO:0022414	782	65	35.025	1.85581	6.74209e-07	7.66586e-05	11857;12144;12235;12236;12316;12527;12532;12577;12606;12617;13614;14211;14276;15270;16669;16691;16859;16952;17319;17345;17427;18005;18817;18858;19016;19143;20133;20873;20878;21454;21930;21973;26357;26934;27356;30939;50500;53381;56419;57264;60530;66197;66977;67121;67141;68549;69716;70099;72415;75909;78284;97165;107995;211651;215387;225182;228421;232345;235320;246747;268697;268860;380773;381489;100…	Fignl1;Fbxo5;Hmgb2;Rbbp8;Rrm1;Pmp22;Mns1;Folr2;Top2a;Smc4;Krt19;Anxa1;Bub1;Mki67;Prdx4;Cenpc1;Sgo2a;Ttpa;Blm;H2afx;Kif18a;Smc2;Cdc20;Edn1;Tcp1;Tnfaip6;Ccnb1;Insl6;St14;Mastl;Nek2;Trip13;Cks2;Fancd2;Apela;Zbtb16;Retn;Cdc25c;Mif;Bub1b;Arhgdib;Racgap1;Abcg2;Plk4;Cebpa;Vmp1;Cdkn1c;Plk1;Aspm;Creb3l4;A2m;Slirp;Sgo1;Rxfp1;Diaph3;Nuf2;Aurka;Cd9;Ncaph;Pparg;Pttg1;Krt8;Adig;Abat;Lgals9
GO:0009636	response to toxic substance	http://amigo.geneontology.org/amigo/term/GO:0009636	340	36	15.2283	2.36402	1.28983e-06	0.000131012	11450;11792;12176;12350;12534;12583;12631;12739;13605;13614;14590;14775;14860;14863;14933;15452;16952;17751;18124;18477;22166;22171;26415;27053;50500;53381;56615;67041;70415;70564;76113;76983;209027;268697;268860;100503605	Cfl1;Cldn3;Cdk1;Mt3;Hbb-bs;Anxa1;Adipoq;Prdx4;Ttpa;Lpo;Stk26;Bnip3;Edn1;Ggh;Scfd1;Gpx1;Cdo1;Ccnb1;Gstm2;Hprt;Txn1;Tyms;Nr4a3;Mapk13;Mgst1;Pycr1;Car3;Gk;Prdx1;Oxct1;Asns;Apex1;Ect2;Gsta4;Abat;Fam213a
GO:0033043	regulation of organelle organization	http://amigo.geneontology.org/amigo/term/GO:0033043	919	71	41.1611	1.72493	2.93692e-06	0.000257166	11799;11857;12154;12176;12189;12235;12236;12306;12338;12428;12442;12544;12577;12631;13605;13614;14432;14775;16551;16765;16952;17345;17427;18005;18481;18600;18817;19241;19822;20194;20460;20739;20873;21454;21973;22351;27054;30939;54141;56150;66371;66468;66494;66824;67052;67141;67749;67849;68549;68612;69716;70186;70385;70472;72119;74194;76983;77744;80986;103573;107995;108907;219103;219114;228421;229…	Fbxo5;Vill;Atad2;Anxa2;Spag5;Cfl1;Mns1;Top2a;Kif11;Anxa1;Ccnb2;Bub1;Xpo1;Mki67;Nusap1;Cdca5;Sgo2a;5330417C22Rik;Kif18a;Cdc45;Chmp4c;Cdc20;Ska1;Bnip3;Edn1;Spdl1;Tcp1;Scfd1;Gpx1;Spta1;Tmsb4x;Cep295;Ccnb1;Bora;Pak3;Mad2l1;Nek2;Trip13;Cenpj;Ska3;Cenpe;Ccna2;Rnf4;Sec23b;Mgarp;Kif20b;Brca1;Bub1b;Arhgdib;Ube2c;Ndc80;Plk4;S100a10;Padi2;Prelid1;Cdkn1c;Plk1;Rnd3;Pycard;Capn6;Tpx2;Stil;Stmn1;Gap43;Birc5;Iqg…
								1e-10

## Sheet: GO_ORA_Downregulated
geneSet	description	link	size	overlap	expect	enrichmentRatio	pValue	FDR	overlapId	userId
GO:0009653	anatomical structure morphogenesis	http://amigo.geneontology.org/amigo/term/GO:0009653	1624	75	43.3296	1.73092	5.77353e-07	0.00439827	11421;11852;12125;12288;13051;13643;13819;14886;15530;15531;16206;16332;16373;16480;17127;17261;17388;17390;18029;18032;18131;18187;18208;19130;20181;20315;20354;20602;20893;20963;21393;21833;22241;22762;24131;27428;50768;50785;50916;53945;56213;57764;57875;58234;66515;67095;68703;68750;68943;69538;72469;74376;75695;76566;76707;98733;100169;100952;109205;216795;216850;217351;231876;232223;235611;…	Ace;Hspb6;Nrp2;Prex1;Smad3;Plcd3;Ago1;Bcl2l11;Lmtk2;Trak1;Syk;Gtf2i;Zmiz1;Ulk1;Megf8;Emilin1;Thra;Plxnb1;Pink1;Bhlhe40;Hs6st1;Wnt9a;Clasp1;Nfic;Nfix;Prox1;Jup;Ntn1;Shank3;Ldb3;Shroom3;Rreb1;Tnrc6c;Sema4d;Phactr4;Irx4;Epas1;Antxr1;Rhobtb2;Mmp15;Htra1;Mef2d;Lrig1;Chsy1;Txnrd3;Angptl4;Rere;Rxra;Cx3cr1;Mmp2;Cacna1c;Inppl1;Notch3;Rilpl1;Kdm6b;Vash1;Myo18b;Obsl1;Slc40a1;Ppp1r13l;Cxcl12;Sobp;Dlc1;Ntn4;N…
GO:0072359	circulatory system development	http://amigo.geneontology.org/amigo/term/GO:0072359	802	44	21.398	2.05627	3.13383e-06	0.00795785	11421;11554;11790;11852;12288;13051;13819;14886;15530;15531;16480;16535;17127;17261;17390;18131;18187;19130;20181;20271;20315;20602;20963;21393;22762;50768;50785;50916;57875;66515;69538;72469;73713;74376;98733;100705;100952;216850;236511;238328;243912;269878;328365;333654	Ace;Hspb6;Nrp2;Smad3;Plcd3;Ago1;Syk;Scn5a;Gtf2i;Zmiz1;Speg;Megf8;Emilin1;Hs6st1;Prox1;Jup;Irx4;Epas1;Antxr1;Acacb;Mef2d;Angptl4;Rxra;Cx3cr1;Mmp2;Cacna1c;Kcnq1;Notch3;Kdm6b;Vash1;Myo18b;Obsl1;Ppp1r13l;Cxcl12;Rbm20;Dlc1;Adrb1;Ndst1;Ncor2;Tcap;Rhob;Zfpm2;Cul7;Hspg2
GO:0009790	embryo development	http://amigo.geneontology.org/amigo/term/GO:0009790	740	41	19.7438	2.0766	5.60734e-06	0.0106792	11421;11790;12125;12288;13435;13819;15530;15531;16206;16373;17127;17388;17390;18187;18208;19130;20181;20602;20893;21393;22762;27428;50768;50785;58234;72469;74376;76707;100169;109205;194388;216795;216850;217351;230796;232223;238328;269878;328365;333654;384071	Ace;Nrp2;Smad3;Plcd3;Bcl2l11;Slc25a34;Zmiz1;Speg;Megf8;Bhlhe40;Hs6st1;Wnt9a;Clasp1;Prox1;Ntn1;Shank3;Shroom3;Tnrc6c;Wdtc1;Phactr4;Epas1;Mmp15;Tet3;Lrig1;Txnrd3;Rxra;Mmp2;Cacna1c;Kdm6b;Vash1;Dnmt3a;Myo18b;Ppp1r13l;Sobp;Dlc1;Ndst1;Ncor2;Tcap;Zfpm2;Irx3;Hspg2
GO:0006629	lipid metabolic process	http://amigo.geneontology.org/amigo/term/GO:0006629	748	41	19.9572	2.05439	7.2954e-06	0.0111153	12894;12896;12908;13850;14732;15360;15490;16332;18023;18145;18604;19130;19885;20851;21833;22229;26457;26897;27273;27399;28169;51798;56690;57875;67260;67442;67893;70025;72469;100705;114663;114886;171210;223753;230796;241274;264895;271424;320655;329065;545276	Scd4;Plcd3;Ech1;Agpat3;Hsd17b7;Pdk4;Cers4;Pgap3;Acot1;Slc27a1;Rorc;Npc1;Thra;Pdk2;Pnpla7;Acsf2;Acot2;Gal3st3;Retsat;Mlycd;Cygb;Ip6k1;Prox1;Gpam;Cerk;Wdtc1;Nfe2l1;Hmgcs2;Impa2;Crat;Acacb;Tmem86a;Angptl4;Inppl1;Acot7;Ephx2;Ucp3;Stat5b;Cpt2;Cpt1a;Ip6k3
GO:0032787	monocarboxylic acid metabolic process	http://amigo.geneontology.org/amigo/term/GO:0032787	342	24	9.12483	2.63019	1.44395e-05	0.0141556	12894;12896;12908;13850;14430;14732;18145;18604;19130;22229;26457;26897;27273;51798;56690;66514;70025;74747;100705;114886;171210;230796;264895;329065	Scd4;Ech1;Pdk4;Asrgl1;Acot1;Galt;Slc27a1;Npc1;Ddit4;Pdk2;Acsf2;Acot2;Mlycd;Cygb;Prox1;Gpam;Wdtc1;Crat;Acacb;Acot7;Ephx2;Ucp3;Cpt2;Cpt1a
GO:0051239	regulation of multicellular organismal process	http://amigo.geneontology.org/amigo/term/GO:0051239	1852	77	49.4128	1.5583	2.2223e-05	0.0167477	11421;11512;11554;11852;12125;12288;12291;12741;12896;13051;13424;13643;13819;14732;14886;15900;16332;16373;16480;16511;16535;17127;17390;18131;18208;18628;19130;19885;20181;20271;20315;20354;20851;20893;20963;21833;21847;22228;22241;22762;26457;27273;27399;57764;58234;66515;67095;67302;68750;70673;74499;76566;76707;94187;98733;100705;100952;101706;108086;108153;215445;216795;216850;217410;230103…	Ace;Hspb6;Prex1;Smad3;Ago1;Per3;Kcnh2;Bcl2l11;Trak1;Cacna1g;Zc3h13;Pdk4;Syk;Adamts7;Scn5a;Gtf2i;Numa1;Rbfox1;Zmiz1;Ulk1;Slc27a1;Itpkb;Rorc;Megf8;Emilin1;Thra;Kdm4a;Sost;Plxnb1;Prdm16;Cldn5;Bhlhe40;Rnf216;Wnt9a;Clasp1;Ip6k1;Prox1;Gpam;Jup;Ntn1;Dync1h1;Shank3;Rreb1;Sema4d;Epas1;Acacb;Trib2;Chsy1;Irf8;Npr2;Zfp423;Rxra;Cx3cr1;Mmp2;Cacna1c;Inppl1;Kcnq1;Notch3;Kdm6b;Adcy6;Ucp2;Vash1;Klf10;Stat5b;Obsl1;…
GO:0007399	nervous system development	http://amigo.geneontology.org/amigo/term/GO:0007399	1374	60	36.6594	1.63669	6.01882e-05	0.0269714	11421;11512;12125;12741;13051;13435;13643;15530;15531;16206;16332;16373;17261;17390;18032;18131;18187;18208;19130;20181;20315;20354;20602;20893;21833;22241;27428;50768;50785;57752;57764;58234;66515;67095;67839;68519;68703;70673;71722;74747;94187;98733;100169;215690;216795;216850;227526;230674;231876;232232;233878;235611;239985;268859;269604;269878;277360;387609;494448;668303	Ace;Nrp2;Prex1;Cbx6;Bcl2l11;Cic;Lmtk2;Trak1;Kif26a;Gpsm1;Rbfox1;Ulk1;Megf8;Ddit4;Hdac11;Thra;Kdm4a;Plxnb1;Prdm16;Cldn5;Bhlhe40;Hs6st1;Wnt9a;Nfix;Prox1;Ntn1;Shank3;Shroom3;Sema4d;Phactr4;Sez6l2;Nav1;Cdnf;Mef2d;Lrig1;Eml1;Tacc2;Zfp423;Rere;Rxra;Cx3cr1;Gpr157;Mmp2;Inppl1;Notch3;Kdm6b;Adcy6;Dnmt3a;Arid1b;Obsl1;Cxcl12;Dlc1;Ntn4;Ndst1;Ncor2;Irx3;Efnb3;Cul7;Hspg2;Zhx2
GO:0042592	homeostatic process	http://amigo.geneontology.org/amigo/term/GO:0042592	1142	52	30.4695	1.70663	7.17468e-05	0.027428	11421;11512;11554;11932;12125;12288;12291;12896;13051;13424;13819;13850;14732;14886;16373;16500;16511;16514;17127;18023;18145;18604;20271;20498;20602;20851;20963;21833;22228;26457;27273;27399;52065;53945;57875;58234;68428;68728;70673;94187;100705;111173;216850;230796;232223;237339;246198;269604;269700;320404;333654;380714	Ace;Smad3;Kcnh2;Bcl2l11;Cacna1g;Pdk4;Syk;L3mbtl3;Mllt6;Scn5a;Gtf2i;Atp1b2;Rph3al;Slc27a1;Itpkb;Npc1;Kcnj11;Thra;Pdk2;Prdm16;Hectd4;Steap3;Ip6k1;Gpam;Dync1h1;Shank3;Slc12a4;Trp53inp2;Wdtc1;Nfe2l1;Epas1;Acacb;Mfhas1;Kcnb1;Txnrd3;Angptl4;Zfp423;Cx3cr1;Gpr157;Cacna1c;Ephx2;Kdm6b;Adcy6;Ucp2;Stat5b;Slc40a1;Ppp1r13l;Cpt2;Adrb1;Ncor2;Irx3;Erc1
GO:0009888	tissue development	http://amigo.geneontology.org/amigo/term/GO:0009888	1180	52	31.4833	1.65167	0.000166286	0.0458527	11554;11790;11852;12741;12894;13717;15530;16373;17127;17261;17388;17390;18187;18208;19130;19885;20181;20230;20315;20354;20602;20851;20893;21393;21833;21847;22762;27428;50768;53945;57764;58234;66515;68750;74376;75695;76566;76707;77578;98733;100169;101706;108153;216795;216850;217082;217351;229595;268859;269878;269941;333654	Nrp2;Smad3;Satb1;Adamts7;Numa1;Rbfox1;Speg;Rorc;Megf8;Thra;Bcl9;Cldn5;Bhlhe40;Wnt9a;Clasp1;Prox1;Ntn1;Shank3;Shroom3;Rreb1;Tnrc6c;Sema4d;Phactr4;Mmp15;Mef2d;Chsy1;Hlf;Eln;Rxra;Mmp2;Rilpl1;Kdm6b;Myo18b;Klf10;Stat5b;Obsl1;Slc40a1;Ppp1r13l;Cxcl12;Cpt1a;Dlc1;Adrb1;Ntn4;Ncor2;Tcap;Rhob;Zfpm2;Irx3;Cul7;Hspg2;Rflnb;Adamtsl4
