# Supplementary material for: The long noncoding RNA Charme supervises cardiomyocyte maturation by controlling cell differentiation programs in the developing heart
Source: eLife. 2023 Mar 6;12:e81360. doi: 10.7554/eLife.81360 (PMC10023161; doi:10.7554/eLife.81360)
Supplement: Supplementary file 3. [file elife-81360-supp3.xlsx]

## Sheet: Sheet1
This table describes ecocardiography measurement for CharmeWT and CharmeKO animals.
	Genotype	Age	Sex		FS	EDD (mm)	ESD (mm)			Genotype	Age	Sex		FS	EDD (mm)	ESD (mm)
	WT	9.33333	Male		47.5	3.4	1.7			KO	11.4667	Male		33	3.8	2.5
	WT	10.0333	Male		45	3.7	2.1			KO	8.5	Male		47	3.3	1.7
	WT	9.8	Male		41.5	3.7	2.1			KO	8.13333	Male		36.5	3.6	2.3
	WT	10.6	Male		45.5	3.5	1.9			KO	11.4667	Male		19.5	4.1	3.3
	WT	9.8	Male		42.9	3.7	2.1			KO	7.9	Male		31	3.4	2.4
	WT	9.33333	Female		37	3.2	2			KO	7.9	Male		41	3.8	2.3
	WT	9.33333	Female		29	3.1	2.2			KO	11.4667	Male		38	4.3	2.7
	WT	9.33333	Female		31	3.3	2.3			KO	8.5	Female		34	3.9	2.6
	WT	9.33333	Female		35	3.8	2.5			KO	8.5	Female		21	3.8	3
	WT	9.33333	Female		40	3.3	2			KO	8.5	Female		22	4	3.1
										KO	8.5	Female		22	4.1	3.2
										KO	8.5	Female		26	3.9	2.9
										KO	8.5	Female		16	4.1	3.5
