# Supplementary material for: The long noncoding RNA Charme supervises cardiomyocyte maturation by controlling cell differentiation programs in the developing heart
Source: eLife. 2023 Mar 6;12:e81360. doi: 10.7554/eLife.81360 (PMC10023161; doi:10.7554/eLife.81360)
Supplement: Supplementary file 4. [file elife-81360-supp4.xlsx]

## Sheet: CLIP-Seq Mapping Statistics
This table describe reads number before and after pre-processing, alignment and post-ptocessing steps.
	Pre-processing		Alignment						Post-processing
	Reads number	Trimmed	Number of uniquely mapped reads	Uniquely mapped reads %	Number of reads mapped to multiple loci	% of reads mapped to multiple loci	Number of reads mapped to too many loci	% of reads mapped to too many loci	Number of uniuqely mapping, properly paired reads after deduplication step	Uniuqely mapping, properly paired reads after deduplication %
INP_R1	32370039	30260566	26139304	86.38%	716243	2.37%	6420	0.02%	5373431	0.177572
INP_R2	32370039	30260566	26139304	86.38%	716243	2.37%	6420	0.02%	5373431	0.177572
Matr3_IP1_R1	24162070	22512101	19451468	86.40%	777091	3.45%	20098	0.09%	16762837	0.744615
Matr3_IP1_R2	24162070	22512101	19451468	86.40%	777091	3.45%	20098	0.09%	16762837	0.744615
Matr3_IP2_R1	20147947	19055964	15028350	78.86%	776462	4.07%	16164	0.08%	11428304	0.599723
Matr3_IP2_R2	20147947	19055964	15028350	78.86%	776462	4.07%	16164	0.08%	11428304	0.599723
IgG_IP_R1	22478856	20726255	163828	0.79%	44068	0.21%	2943	0.01%	85238	0.00411256
IgG_IP_R1	22478856	20726255	163828	0.79%	44068	0.21%	2943	0.01%	85238	0.00411256
INP_CharmeKO_R1	23378281	21966581	15588272	0.7096	276805	0.0126	2558	0.0001	1493472	0.0679884
INP_CharmeKO_R2	23378281	21966581	15588272	0.7096	276805	0.0126	2558	0.0001	1493472	0.0679884
Matr3_IP1_CharmeKO_R1	34550678	31463571	26298383	0.8358	993061	0.0316	35071	0.0011	19091897	0.606794
Matr3_IP1_CharmeKO_R2	34550678	31463571	26298383	0.8358	993061	0.0316	35071	0.0011	19091897	0.606794
Matr3_IP2_CharmeKO_R1	36239879	32775108	26842243	0.819	1173310	0.0358	32987	0.001	17897406	0.546067
Matr3_IP2_CharmeKO_R2	36239879	32775108	26842243	0.819	1173310	0.0358	32987	0.001	17897406	0.546067
IgG_IP_CharmeKO_R1	32258376	29418873	662946	0.0225	114918	0.0039	10591	0.0004	139405	0.00473862
IgG_IP_CharmeKO_R1	32258376	29418873	662946	0.0225	114918	0.0039	10591	0.0004	139405	0.00473862

## Sheet: Peaks calling statistics 
This table describe peak calling, processing and filtering steps (see Methods for further explanation).
	Piranha enriched bins	Filtering bins by transcripts input signal	Merged Ip1 and Ip2 bins	Peaks enriched over input (log2Fold >2 and FDR < 0.05)	Common enriched peaks	Filtering peaks by transcripts cpm (Input > Ip cpms) and by IgG Ip enrichment
Matr3_IP1	24932	22736	11291	5180	2352	2215
Matr3_IP2	2798	2209	11291	3568	2352	2215
Matr3_CharmeKO_IP1	26046	18930	11525	4615	3537	3241
Matr3_CharmeKO_IP2	13804	8617	11525	4885	3537	3241

## Sheet: Matr3_Ip2_enrichment_over_input
chr	start	end	id_region	score	strand	FPM_Input	FPM_Ip2	log2FoldEnrichment	PValue	FDR
1	6205600	6206000	MergedBins_1	2458	*	5.02472	215.08	5.41969	7.67743e-239	8.17791e-237
1	7111400	7111800	MergedBins_2	9	*	0.372202	0.787518	1.08123	0.520175	0.553458
1	9736600	9737000	MergedBins_3	0	*	2.60541	0	-8.21798	1.17101e-07	2.19159e-07
1	10164800	10165200	MergedBins_4	1	*	4.46642	0.087502	-5.67366	2.27084e-11	5.15481e-11
1	10177800	10178000	MergedBins_5	0	*	0.930504	0	-6.73255	0.0033457	0.00451492
1	10225600	10225800	MergedBins_6	0	*	0.186101	0	-4.41062	0.319814	0.349765
1	11115000	11115400	MergedBins_7	1021	*	1.86101	89.3396	5.58514	7.92361e-101	1.18812e-99
1	13255200	13255400	MergedBins_8	0	*	6.51353	0	-9.53991	4.69225e-18	1.38005e-17
1	13279200	13279400	MergedBins_9	0	*	1.67491	0	-7.58055	3.50006e-05	5.545e-05
1	13280600	13281000	MergedBins_10	181	*	10.4216	15.8379	0.603795	0.0072011	0.00948526
1	13337200	13337600	MergedBins_11	143	*	1.48881	12.5128	3.07118	3.83919e-12	9.04974e-12
1	13342600	13343000	MergedBins_12	223	*	1.48881	19.513	3.7122	2.89619e-20	9.1165e-20
1	13360800	13361400	MergedBins_13	74	*	1.11661	6.47515	2.5358	4.76284e-06	8.00613e-06
1	13361600	13362400	MergedBins_14	429	*	4.83862	37.5384	2.9557	5.55078e-33	2.4059e-32
1	16332600	16333200	MergedBins_15	30	*	4.65252	2.62506	-0.825661	0.0457398	0.0555201
1	16417000	16417200	MergedBins_16	657	*	0.186101	57.4888	8.27105	2.9538e-108	5.11523e-107
1	16590200	16590400	MergedBins_17	0	*	9.30504	0	-10.0545	1.75715e-25	6.46045e-25
1	21000600	21000800	MergedBins_18	749	*	1.86101	65.539	5.1382	5.08059e-73	4.63742e-72
1	21652400	21652600	MergedBins_19	0	*	2.23321	0	-7.99559	1.1449e-06	2.0145e-06
1	21726800	21727000	MergedBins_20	0	*	0.558303	0	-5.99559	0.0327109	0.0403208
1	21728200	21728600	MergedBins_21	7	*	2.79151	0.612514	-2.18823	0.000644988	0.000933183
1	21771800	21772200	MergedBins_22	631	*	2.97761	55.2138	4.2128	5.6137e-58	4.01675e-57
1	21772600	21772800	MergedBins_23	998	*	0.744403	87.327	6.8742	6.72738e-159	2.75213e-157
1	21779600	21779800	MergedBins_24	0	*	0.744403	0	-6.41062	0.0104614	0.0135226
1	21841000	21841400	MergedBins_25	832	*	2.41931	72.8017	4.9113	5.61921e-80	5.60977e-79
1	21859000	21859400	MergedBins_26	0	*	0.930504	0	-6.73255	0.0033457	0.00451492
1	21888400	21888800	MergedBins_27	1018	*	0.372202	89.0771	7.90283	3.50995e-166	1.63764e-164
1	21897800	21898000	MergedBins_28	1	*	8.74674	0.087502	-6.64328	1.77104e-22	5.96386e-22
1	21911000	21911200	MergedBins_29	0	*	4.28032	0	-8.93419	4.09854e-12	9.58903e-12
1	21912400	21912600	MergedBins_30	4	*	0.186101	0.350008	0.911304	1	1
1	21915200	21915600	MergedBins_31	0	*	6.32743	0	-9.49809	1.46719e-17	4.239e-17
1	21918800	21919200	MergedBins_32	21	*	2.41931	1.83754	-0.396818	0.549836	0.582547
1	21934400	21934800	MergedBins_33	122	*	3.53592	10.6752	1.59411	3.81344e-06	6.4467e-06
1	21941800	21942000	MergedBins_34	6	*	0.930504	0.525012	-0.825661	0.344865	0.375349
1	23260400	23260600	MergedBins_35	785	*	5.58303	68.6891	3.62096	6.06933e-67	5.03518e-66
1	23916400	23916800	MergedBins_36	47	*	8.18844	4.1126	-0.993539	0.00121284	0.00170793
1	24615800	24616000	MergedBins_37	140	*	5.39692	12.2503	1.18261	5.14887e-05	8.08341e-05
1	30849600	30850200	MergedBins_38	133	*	1.67491	11.6378	2.79666	1.0346e-10	2.28515e-10
1	30853200	30853400	MergedBins_39	10	*	1.67491	0.87502	-0.936693	0.233225	0.261764
1	33596200	33596400	MergedBins_40	0	*	1.11661	0	-6.99559	0.00107	0.00151206
1	33795000	33795400	MergedBins_41	883	*	5.76913	77.2643	3.74338	2.18441e-76	2.09018e-75
1	34132000	34132400	MergedBins_42	1	*	2.97761	0.087502	-5.0887	1.42325e-07	2.64917e-07
1	34141400	34141600	MergedBins_43	8	*	7.25793	0.700016	-3.3741	2.14059e-13	5.29798e-13
1	34144800	34145200	MergedBins_44	0	*	1.11661	0	-6.99559	0.00107	0.00151206
1	34146200	34146600	MergedBins_45	41	*	0.558303	3.58758	2.68389	0.000127512	0.000194559
1	34161000	34161200	MergedBins_46	1	*	56.0164	0.087502	-9.32232	1.92751e-147	6.67593e-146
1	34163000	34163200	MergedBins_47	3	*	48.5723	0.262506	-7.53164	5.73254e-124	1.36553e-122
1	34828200	34828400	MergedBins_48	308	*	1.67491	26.9506	4.00817	1.8618e-28	7.31694e-28
1	34954800	34955000	MergedBins_49	617	*	0	53.9888	11.5024	9.28877e-104	1.48765e-102
1	36148400	36148600	MergedBins_50	590	*	0.744403	51.6262	6.11588	1.60446e-91	2.0062e-90
1	36337800	36338200	MergedBins_51	194	*	1.86101	16.9754	3.18929	2.07578e-16	5.76999e-16
1	36338600	36339000	MergedBins_52	424	*	1.11661	37.1009	5.05426	8.24179e-42	4.25895e-41
1	36339400	36339800	MergedBins_53	116	*	3.72202	10.1502	1.44736	2.36159e-05	3.80543e-05
1	36441200	36441400	MergedBins_54	146	*	1.86101	12.7753	2.7792	1.36116e-11	3.11552e-11
1	36844000	36844200	MergedBins_55	12	*	1.30271	1.05002	-0.311088	0.834973	0.855894
1	36845800	36846000	MergedBins_56	1	*	5.21082	0.087502	-5.89605	2.74866e-13	6.78216e-13
1	36924200	36924600	MergedBins_57	399	*	2.41931	34.9133	3.85111	8.21806e-36	3.76889e-35
1	38094200	38094400	MergedBins_58	0	*	1.86101	0	-7.73255	1.11937e-05	1.83597e-05
1	39264400	39264600	MergedBins_59	15	*	0.930504	1.31253	0.496267	0.634875	0.665464
1	39902200	39902600	MergedBins_60	26	*	9.67724	2.27505	-2.0887	1.14403e-10	2.52389e-10
1	39904200	39904400	MergedBins_61	42	*	29.7761	3.67509	-3.01831	1.74036e-46	9.85478e-46
1	39908200	39908800	MergedBins_62	814	*	4.65252	71.2267	3.93633	3.08164e-72	2.78805e-71
1	39910600	39911200	MergedBins_63	330	*	10.6077	28.8757	1.44474	5.10186e-13	1.24203e-12
1	39913800	39914000	MergedBins_64	0	*	2.79151	0	-8.31751	3.74505e-08	7.20241e-08
1	39915400	39915800	MergedBins_65	0	*	2.79151	0	-8.31751	3.74505e-08	7.20241e-08
1	39918000	39918200	MergedBins_66	67	*	2.60541	5.86264	1.17004	0.00658775	0.00870853
1	39927000	39927600	MergedBins_67	895	*	4.28032	78.3143	4.19349	1.95754e-81	2.02405e-80
1	39932600	39932800	MergedBins_68	0	*	1.11661	0	-6.99559	0.00107	0.00151206
1	40829800	40830000	MergedBins_69	21	*	8.18844	1.83754	-2.15581	1.54092e-09	3.21007e-09
1	43124200	43124400	MergedBins_70	31	*	2.60541	2.71256	0.0581455	0.97237	0.981702
1	43128800	43130000	MergedBins_71	1903	*	15.8186	166.516	3.39597	2.55358e-154	9.90805e-153
1	43130400	43131000	MergedBins_72	169	*	9.86334	14.7878	0.584263	0.0117995	0.0151949
1	43131200	43131800	MergedBins_73	176	*	5.58303	15.4004	1.46385	1.2537e-07	2.34092e-07
1	43142200	43142400	MergedBins_74	9	*	2.04711	0.787518	-1.3782	0.0491331	0.0593837
1	43144200	43144800	MergedBins_75	1461	*	8.74674	127.84	3.86946	2.38944e-127	6.06274e-126
1	43145000	43145600	MergedBins_76	9	*	14.1437	0.787518	-4.1667	2.70885e-29	1.08e-28
1	43146200	43146600	MergedBins_77	134	*	6.51353	11.7253	0.84811	0.00221935	0.00306828
1	43151400	43151800	MergedBins_78	111	*	3.53592	9.71273	1.45779	3.30588e-05	5.29007e-05
1	43154400	43154800	MergedBins_79	86	*	11.9105	7.52518	-0.662431	0.00656074	0.00867415
1	43155800	43158800	MergedBins_80	1505	*	46.153	131.691	1.51266	1.62799e-57	1.15462e-56
1	43160200	43160600	MergedBins_81	268	*	10.6077	23.4505	1.1445	3.32945e-08	6.4537e-08
1	43160800	43162800	MergedBins_82	840	*	48.3862	73.5017	0.603182	3.58966e-09	7.35053e-09
1	43167000	43167800	MergedBins_83	572	*	12.2827	50.0512	2.02678	1.70431e-31	7.15368e-31
1	43170200	43170600	MergedBins_84	119	*	9.11894	10.4127	0.191412	0.484229	0.517602
1	43170800	43171200	MergedBins_85	0	*	34.4287	0	-11.942	2.54162e-92	3.22443e-91
1	43171400	43171800	MergedBins_86	107	*	27.9151	9.36272	-1.57605	2.21623e-19	6.76127e-19
1	43172200	43172400	MergedBins_87	28	*	2.60541	2.45006	-0.0886959	0.982102	0.989551
1	43172800	43173200	MergedBins_88	195	*	6.69963	17.0629	1.34871	1.34375e-07	2.50574e-07
1	43173600	43174000	MergedBins_89	41	*	5.02472	3.58758	-0.486031	0.216564	0.243766
1	43174800	43176000	MergedBins_90	1672	*	17.6796	146.303	3.04881	8.36595e-127	2.10848e-125
1	43176200	43177800	MergedBins_91	1716	*	17.3074	150.154	3.11698	4.73983e-132	1.30213e-130
1	43178000	43179000	MergedBins_92	549	*	11.1661	48.0386	2.10508	1.91169e-31	8.00924e-31
1	43180600	43181000	MergedBins_93	276	*	6.69963	24.1506	1.8499	1.57276e-14	4.07668e-14
1	43181200	43181800	MergedBins_94	334	*	16.563	29.2257	0.819275	1.81801e-06	3.16289e-06
1	43183600	43184200	MergedBins_95	366	*	36.4758	32.0257	-0.187706	0.153928	0.175911
1	43186000	43186400	MergedBins_96	62	*	26.2402	5.42513	-2.27405	5.68081e-30	2.30561e-29
1	43187600	43188000	MergedBins_97	63	*	14.1437	5.51263	-1.35934	1.64293e-08	3.22558e-08
1	43188400	43189200	MergedBins_98	537	*	8.18844	46.9886	2.52065	3.08667e-36	1.43422e-35
1	43189600	43190400	MergedBins_99	622	*	15.0742	54.4263	1.85222	4.60211e-31	1.91249e-30
1	43191800	43192000	MergedBins_100	0	*	5.95523	0	-9.41062	1.43448e-16	4.00215e-16
1	43192800	43193800	MergedBins_101	443	*	9.11894	38.7634	2.08776	1.90692e-25	6.99288e-25
1	43195400	43196600	MergedBins_102	2686	*	81.3261	235.03	1.53106	7.11922e-103	1.11643e-101
1	43197400	43197600	MergedBins_103	0	*	0.744403	0	-6.41062	0.0104614	0.0135226
1	43198800	43199000	MergedBins_104	297	*	2.23321	25.9881	3.54066	6.35177e-26	2.35836e-25
1	43453000	43453600	MergedBins_105	114	*	2.23321	9.97523	2.15923	1.0999e-07	2.07294e-07
1	43454200	43454400	MergedBins_106	0	*	6.14133	0	-9.45502	4.58765e-17	1.30083e-16
1	43457800	43458400	MergedBins_107	5	*	2.60541	0.43751	-2.57412	0.000233289	0.000351022
1	43463400	43463600	MergedBins_108	23	*	1.86101	2.01255	0.112938	0.983961	0.990982
1	43519800	43520000	MergedBins_109	535	*	2.41931	46.8136	4.27426	1.16088e-49	6.94256e-49
1	43965200	43965400	MergedBins_110	530	*	1.86101	46.3761	4.63922	1.23009e-50	7.52788e-50
1	43989400	43989600	MergedBins_111	15	*	1.30271	1.31253	0.0108398	0.831995	0.85354
1	44577800	44578000	MergedBins_112	35	*	0.744403	3.06257	2.04059	0.00292722	0.00400719
1	44663800	44664200	MergedBins_113	1612	*	1.11661	141.053	6.98098	2.3857e-163	1.04813e-161
1	45316400	45316800	MergedBins_114	839	*	0.744403	73.4142	6.62383	1.03729e-132	2.89186e-131
1	45322400	45322600	MergedBins_115	74	*	26.9846	6.47515	-2.05915	3.91758e-27	1.50198e-26
1	45345800	45346200	MergedBins_116	33	*	24.1931	2.88757	-3.06667	1.33512e-38	6.51183e-38
1	45347000	45347400	MergedBins_117	69	*	35.1731	6.03764	-2.54241	1.9282e-45	1.0709e-44
1	45347600	45348000	MergedBins_118	219	*	63.4604	19.1629	-1.72754	1.9754e-48	1.15686e-47
1	45348600	45349200	MergedBins_119	474	*	67.3685	41.476	-0.699798	2.93737e-12	6.94281e-12
1	45495200	45495600	MergedBins_120	175	*	1.48881	15.3129	3.36252	2.21199e-15	5.92259e-15
1	45495800	45496000	MergedBins_121	18	*	0.372202	1.57504	2.08123	0.0513536	0.0619811
1	51831200	51831800	MergedBins_122	14	*	4.09422	1.22503	-1.74077	0.000358776	0.000528636
1	52203400	52203600	MergedBins_123	630	*	7.44403	55.1263	2.88858	5.60175e-47	3.19603e-46
1	53884000	53884400	MergedBins_124	608	*	0.372202	53.2012	7.15923	5.21933e-98	7.48812e-97
1	54180000	54180400	MergedBins_125	143	*	0.744403	12.5128	4.07118	3.24484e-19	9.84349e-19
1	54183000	54183200	MergedBins_126	680	*	1.11661	59.5014	5.73573	5.06946e-68	4.28438e-67
1	54402200	54402400	MergedBins_127	0	*	4.09422	0	-8.87006	1.28154e-11	2.93805e-11
1	55003000	55003400	MergedBins_128	709	*	9.11894	62.039	2.76624	5.10699e-51	3.14412e-50
1	55472000	55472200	MergedBins_129	823	*	0.186101	72.0142	8.59605	6.04707e-136	1.74623e-134
1	55472400	55472600	MergedBins_130	897	*	0.186101	78.4893	8.72027	3.12243e-148	1.10173e-146
1	55559600	55560000	MergedBins_131	615	*	1.67491	53.8138	5.00582	7.88433e-60	5.78817e-59
1	55593200	55593600	MergedBins_132	217	*	3.90812	18.9879	2.28054	3.18696e-14	8.18375e-14
1	57355200	57355600	MergedBins_133	790	*	0	69.1266	11.8589	7.21597e-133	2.02172e-131
1	57855600	57855800	MergedBins_134	0	*	0.744403	0	-6.41062	0.0104614	0.0135226
1	58714200	58714600	MergedBins_135	192	*	2.23321	16.8004	2.9113	2.42546e-15	6.488e-15
1	58929200	58929600	MergedBins_136	15	*	7.81624	1.31253	-2.57412	3.88019e-11	8.72734e-11
1	58945600	58945800	MergedBins_137	9	*	1.48881	0.787518	-0.918771	0.28333	0.31419
1	59663600	59663800	MergedBins_138	562	*	0.744403	49.1762	6.04573	7.25719e-87	8.21051e-86
1	59871200	59872200	MergedBins_139	215	*	14.1437	18.8129	0.411569	0.0373299	0.0457596
1	59872400	59873200	MergedBins_140	1102	*	43.9198	96.4273	1.13457	3.25162e-29	1.29457e-28
1	59873400	59874800	MergedBins_141	274	*	32.3815	23.9756	-0.433607	0.0022017	0.00304462
1	59875000	59875400	MergedBins_142	73	*	5.58303	6.38765	0.194238	0.606094	0.637486
1	59964600	59964800	MergedBins_143	22	*	2.23321	1.92505	-0.214227	0.817858	0.840968
1	60110200	60110600	MergedBins_144	1196	*	0.372202	104.652	8.13531	7.45531e-196	5.07096e-194
1	60186800	60187000	MergedBins_145	0	*	0.186101	0	-4.41062	0.319814	0.349765
1	60262400	60262800	MergedBins_146	1430	*	0.744403	125.128	7.3931	9.83344e-231	9.73942e-229
1	60490400	60490600	MergedBins_147	623	*	2.04711	54.5138	4.73496	1.22912e-59	8.99418e-59
1	60509000	60509600	MergedBins_148	31	*	2.97761	2.71256	-0.1345	0.883451	0.902229
1	60521800	60522000	MergedBins_149	9	*	10.2355	0.787518	-3.70013	7.455e-20	2.31503e-19
1	60536600	60536800	MergedBins_150	0	*	1.67491	0	-7.58055	3.50006e-05	5.545e-05
1	60537800	60538200	MergedBins_151	121	*	4.09422	10.5877	1.37074	3.10448e-05	4.97555e-05
1	60539400	60539600	MergedBins_152	9	*	0.186101	0.787518	2.08123	0.18441	0.209011
1	60542000	60542200	MergedBins_153	64	*	3.72202	5.60013	0.589376	0.136523	0.156846
1	60542800	60543200	MergedBins_154	0	*	15.4464	0	-10.7857	8.05952e-42	4.17049e-41
1	60546600	60546800	MergedBins_155	26	*	2.79151	2.27505	-0.295147	0.642188	0.67238
1	61719000	61719200	MergedBins_156	532	*	0.372202	46.5511	6.96659	2.69527e-85	2.97481e-84
1	61844600	61845000	MergedBins_157	21	*	1.48881	1.83754	0.303622	0.757775	0.783736
1	61868400	61868600	MergedBins_158	39	*	1.86101	3.41258	0.874778	0.113235	0.131307
1	61869600	61870000	MergedBins_159	9	*	3.34982	0.787518	-2.0887	0.000254259	0.000381202
1	62308600	62308800	MergedBins_160	570	*	0.558303	49.8762	6.48116	5.91787e-90	7.1617e-89
1	62748600	62748800	MergedBins_161	706	*	0.186101	61.7764	8.37483	2.87559e-116	5.78757e-115
1	63160800	63161200	MergedBins_162	32	*	37.9646	2.80007	-3.76112	2.09444e-71	1.86796e-70
1	63163600	63164000	MergedBins_163	23	*	54.7136	2.01255	-4.76481	2.02674e-118	4.30149e-117
1	64075800	64076000	MergedBins_164	15	*	1.11661	1.31253	0.233232	0.919467	0.935534
1	64103000	64103200	MergedBins_165	0	*	12.0966	0	-10.433	6.58e-33	2.84545e-32
1	64113000	64113400	MergedBins_166	275	*	1.86101	24.0631	3.69266	1.27859e-24	4.59764e-24
1	64119200	64119400	MergedBins_167	53	*	0.930504	4.63761	2.3173	5.17732e-05	8.12694e-05
1	64531400	64531800	MergedBins_168	9	*	1.30271	0.787518	-0.726126	0.458514	0.491417
1	64704400	64704800	MergedBins_169	113	*	2.79151	9.88773	1.82459	1.43245e-06	2.50601e-06
1	66799600	66800000	MergedBins_170	23	*	0.372202	2.01255	2.43487	0.00876787	0.0114967
1	66833400	66833600	MergedBins_171	40	*	0.930504	3.50008	1.9113	0.00200365	0.00277687
1	66835000	66835200	MergedBins_172	51	*	0.372202	4.4626	3.58373	8.27403e-07	1.48148e-06
1	66835600	66836000	MergedBins_173	85	*	1.30271	7.43767	2.51334	9.55813e-07	1.70518e-06
1	68170000	68170200	MergedBins_174	185	*	0.186101	16.1879	6.44269	8.18189e-30	3.30643e-29
1	68183800	68184200	MergedBins_175	2144	*	1.48881	187.604	6.97739	1.12751e-216	9.71807e-215
1	68481200	68481600	MergedBins_176	0	*	3.16371	0	-8.49809	3.83046e-09	7.77174e-09
1	68521600	68522000	MergedBins_177	30	*	2.41931	2.62506	0.117755	0.934331	0.948528
1	68670000	68670200	MergedBins_178	2	*	0.372202	0.175004	-1.0887	0.597431	0.628725
1	68700200	68700600	MergedBins_179	154	*	1.11661	13.4753	3.59313	3.68151e-14	9.44083e-14
1	68714400	68714600	MergedBins_180	0	*	6.14133	0	-9.45502	4.58765e-17	1.30083e-16
1	68718400	68718600	MergedBins_181	0	*	4.28032	0	-8.93419	4.09854e-12	9.58903e-12
1	68723400	68723600	MergedBins_182	0	*	5.58303	0	-9.31751	1.4025e-15	3.76949e-15
1	68778600	68778800	MergedBins_183	18	*	0.930504	1.57504	0.759301	0.374295	0.406011
1	68833200	68833400	MergedBins_184	54	*	1.30271	4.72511	1.85884	0.000978589	0.00140006
1	68834600	68835200	MergedBins_185	5720	*	0.744403	500.512	9.3931	0	0
1	68847200	68847800	MergedBins_186	319	*	3.90812	27.9132	2.8364	3.52983e-24	1.25017e-23
1	68895800	68896600	MergedBins_187	736	*	5.02472	64.4015	3.67998	2.18429e-63	1.69971e-62
1	68897200	68897800	MergedBins_188	371	*	2.41931	32.4633	3.74614	5.7564e-33	2.49407e-32
1	68909200	68909400	MergedBins_189	52	*	1.48881	4.55011	1.61174	0.00308992	0.00422172
1	68909800	68910000	MergedBins_190	49	*	2.04711	4.2876	1.06658	0.033316	0.0410353
1	68921600	68922000	MergedBins_191	47	*	1.30271	4.1126	1.65854	0.00436389	0.0058535
1	68922800	68923200	MergedBins_192	0	*	5.58303	0	-9.31751	1.4025e-15	3.76949e-15
1	68944800	68945400	MergedBins_193	83	*	2.23321	7.26267	1.70138	8.36487e-05	0.000130147
1	68945600	68946400	MergedBins_194	198	*	4.28032	17.3254	2.0171	1.01447e-11	2.34146e-11
1	68948600	68949200	MergedBins_195	203	*	5.02472	17.7629	1.82175	7.44542e-11	1.65127e-10
1	68949400	68949800	MergedBins_196	43	*	4.46642	3.76259	-0.247394	0.587227	0.619315
1	68982600	68982800	MergedBins_197	0	*	3.90812	0	-8.80294	4.00716e-11	8.96648e-11
1	68990800	68991800	MergedBins_198	488	*	6.69963	42.701	2.67212	1.19075e-34	5.30573e-34
1	68992400	68992600	MergedBins_199	0	*	1.86101	0	-7.73255	1.11937e-05	1.83597e-05
1	69003000	69003400	MergedBins_200	0	*	28.4734	0	-11.668	1.7729e-76	1.69931e-75
1	69011000	69011400	MergedBins_201	6	*	5.58303	0.525012	-3.41062	1.29772e-10	2.84791e-10
1	69025400	69025600	MergedBins_202	17	*	6.51353	1.48753	-2.13052	1.0774e-07	2.03257e-07
1	69029800	69030200	MergedBins_203	43	*	2.60541	3.76259	0.530214	0.289551	0.320742
1	69032800	69034800	MergedBins_204	1012	*	12.2827	88.5521	2.8499	8.67099e-74	8.01835e-73
1	69047000	69047200	MergedBins_205	76	*	3.53592	6.65016	0.911304	0.0166721	0.0211868
1	69049000	69049400	MergedBins_206	0	*	8.93284	0	-9.99559	1.71799e-24	6.15022e-24
1	69051000	69051200	MergedBins_207	15	*	34.2426	1.31253	-4.70537	3.7834e-74	3.51591e-73
1	69053600	69054000	MergedBins_208	0	*	2.04711	0	-7.87006	3.57989e-06	6.07007e-06
1	69055000	69055800	MergedBins_209	551	*	8.18844	48.2136	2.55778	1.35456e-37	6.48889e-37
1	69070400	69071200	MergedBins_210	433	*	4.83862	37.8884	2.96909	2.22156e-33	9.69227e-33
1	69080400	69080800	MergedBins_211	229	*	3.72202	20.038	2.42858	9.37186e-16	2.54369e-15
1	69091200	69091600	MergedBins_212	1381	*	0.558303	120.84	7.75784	1.54861e-224	1.42157e-222
1	69100000	69100800	MergedBins_213	1547	*	4.09422	135.366	5.04713	2.10521e-148	7.45138e-147
1	69103800	69104000	MergedBins_214	41	*	6.51353	3.58758	-0.860427	0.0121706	0.0156638
1	69664600	69664800	MergedBins_215	0	*	1.48881	0	-7.41062	0.000109441	0.000167597
1	71586800	71587000	MergedBins_216	87	*	15.4464	7.61268	-1.02079	3.72717e-06	6.30652e-06
1	71590000	71590400	MergedBins_217	100	*	19.3545	8.7502	-1.14528	9.29582e-09	1.85834e-08
1	71590600	71591000	MergedBins_218	55	*	15.0742	4.81261	-1.64719	1.02095e-11	2.35593e-11
1	71597600	71597800	MergedBins_219	1	*	16.0047	0.087502	-7.51496	1.56848e-41	8.07923e-41
1	71598400	71598600	MergedBins_220	0	*	18.2379	0	-11.0253	3.01785e-49	1.79151e-48
1	71599200	71599400	MergedBins_221	0	*	12.841	0	-10.5191	6.88338e-35	3.07925e-34
1	71602400	71602600	MergedBins_222	39	*	7.44403	3.41258	-1.12522	0.00059522	0.000863945
1	71610800	71611000	MergedBins_223	55	*	7.44403	4.81261	-0.629264	0.044891	0.0545308
1	71612400	71612600	MergedBins_224	42	*	14.3298	3.67509	-1.96316	4.16715e-14	1.06572e-13
1	71615400	71615600	MergedBins_225	8	*	16.0047	0.700016	-4.51496	1.49138e-34	6.63744e-34
1	71619400	71619600	MergedBins_226	12	*	8.74674	1.05002	-3.05832	1.23152e-14	3.22025e-14
1	72858000	72859800	MergedBins_227	814	*	99.75	71.2267	-0.4859	1.40829e-09	2.93702e-09
1	72860000	72860600	MergedBins_228	181	*	27.5429	15.8379	-0.798303	5.7947e-07	1.04467e-06
1	72861800	72862000	MergedBins_229	27	*	7.07183	2.36256	-1.58174	8.81413e-06	1.46504e-05
1	72873800	72874000	MergedBins_230	13	*	2.79151	1.13753	-1.29515	0.0246488	0.0309646
1	73910400	73910600	MergedBins_231	280	*	16.1908	24.5006	0.597644	0.000828009	0.00119096
1	73913000	73913200	MergedBins_232	72	*	13.7715	6.30015	-1.12822	1.96701e-06	3.41632e-06
1	73932400	73932800	MergedBins_233	97	*	11.3522	8.4877	-0.41952	0.0890352	0.105355
1	73939400	73939600	MergedBins_234	159	*	6.32743	13.9128	1.13672	2.65032e-05	4.2634e-05
1	73940000	73940400	MergedBins_235	0	*	14.5159	0	-10.696	2.40904e-39	1.19196e-38
1	73944000	73944400	MergedBins_236	0	*	2.23321	0	-7.99559	1.1449e-06	2.0145e-06
1	73947800	73948200	MergedBins_237	136	*	41.1283	11.9003	-1.78914	1.60487e-33	7.02622e-33
1	73959000	73959600	MergedBins_238	286	*	5.21082	25.0256	2.26382	3.25109e-18	9.59524e-18
1	73967800	73968600	MergedBins_239	88	*	14.5159	7.70018	-0.914666	4.8598e-05	7.63915e-05
1	73969600	73969800	MergedBins_240	322	*	1.67491	28.1757	4.0723	6.94066e-30	2.80684e-29
1	73970800	73971200	MergedBins_241	16	*	3.16371	1.40003	-1.17616	0.0264664	0.0331889
1	73971800	73972200	MergedBins_242	25	*	4.09422	2.18755	-0.904271	0.043067	0.0523997
1	74045600	74046000	MergedBins_243	208	*	20.6572	18.2004	-0.182672	0.308723	0.340842
1	74051000	74051400	MergedBins_244	11	*	2.60541	0.962523	-1.43662	0.0182521	0.0231452
1	74351600	74352000	MergedBins_245	49	*	2.23321	4.2876	0.941051	0.0543529	0.0655311
1	74352400	74353600	MergedBins_246	15	*	6.88573	1.31253	-2.39126	3.46671e-09	7.11166e-09
1	74512800	74513200	MergedBins_247	127	*	2.23321	11.1128	2.31503	6.20599e-09	1.25061e-08
1	74514000	74514800	MergedBins_248	62	*	1.67491	5.42513	1.69558	0.000777955	0.00111968
1	74690600	74691000	MergedBins_249	0	*	2.04711	0	-7.87006	3.57989e-06	6.07007e-06
1	75147600	75147800	MergedBins_250	11	*	8.93284	0.962523	-3.21423	1.32911e-15	3.5919e-15
1	75367400	75367800	MergedBins_251	129	*	50.9916	11.2878	-2.1755	8.08415e-54	5.29149e-53
1	75386400	75386800	MergedBins_252	200	*	2.97761	17.5004	2.55516	1.71118e-14	4.42431e-14
1	75395400	75395600	MergedBins_253	0	*	0.930504	0	-6.73255	0.0033457	0.00451492
1	75397200	75397400	MergedBins_254	0	*	3.53592	0	-8.65855	3.91782e-10	8.4051e-10
1	77485800	77486200	MergedBins_255	4	*	3.16371	0.350008	-3.17616	5.45974e-06	9.15444e-06
1	77486400	77486600	MergedBins_256	14	*	0.186101	1.22503	2.71866	0.0483228	0.0584669
1	78679000	78679200	MergedBins_257	3	*	1.86101	0.262506	-2.82566	0.00114713	0.00161761
1	79608200	79608600	MergedBins_258	1046	*	0.186101	91.5271	8.94197	5.32304e-173	2.69518e-171
1	79687400	79687800	MergedBins_259	992	*	0	86.802	12.1874	1.12895e-166	5.35587e-165
1	80299200	80299400	MergedBins_260	81	*	2.23321	7.08767	1.66619	0.000126301	0.000192763
1	80302800	80303200	MergedBins_261	994	*	2.41931	86.977	5.16797	1.58815e-96	2.20563e-95
1	82254400	82255000	MergedBins_262	34	*	2.60541	2.97507	0.191412	0.792257	0.817377
1	82269200	82269800	MergedBins_263	31	*	6.69963	2.71256	-1.30442	0.000227689	0.000343052
1	82276400	82277000	MergedBins_264	58	*	3.16371	5.07512	0.681822	0.10832	0.125931
1	82277200	82277600	MergedBins_265	68	*	2.60541	5.95014	1.19141	0.00550152	0.00731974
1	82278600	82278800	MergedBins_266	3	*	0.930504	0.262506	-1.82566	0.120609	0.139457
1	82279200	82279600	MergedBins_267	237	*	6.51353	20.738	1.67076	2.17408e-11	4.94313e-11
1	82739200	82739400	MergedBins_268	286	*	1.48881	25.0256	4.07118	1.07948e-26	4.08597e-26
1	85908400	85908600	MergedBins_269	0	*	6.32743	0	-9.49809	1.46719e-17	4.239e-17
1	86709800	86710200	MergedBins_270	940	*	0.744403	82.2519	6.78782	2.3129e-149	8.31688e-148
1	87366400	87366800	MergedBins_271	1054	*	1.48881	92.2272	5.95296	3.06041e-105	5.00798e-104
1	87413200	87413600	MergedBins_272	0	*	3.16371	0	-8.49809	3.83046e-09	7.77174e-09
1	87906800	87907000	MergedBins_273	0	*	0.558303	0	-5.99559	0.0327109	0.0403208
1	87911800	87912200	MergedBins_274	63	*	1.67491	5.51263	1.71866	0.000631031	0.000913457
1	88264800	88265200	MergedBins_275	0	*	6.14133	0	-9.45502	4.58765e-17	1.30083e-16
1	88265400	88265600	MergedBins_276	19	*	10.0494	1.66254	-2.59566	3.82353e-14	9.79834e-14
1	89485400	89485800	MergedBins_277	56	*	2.04711	4.90011	1.25923	0.00931112	0.0121892
1	91006600	91007400	MergedBins_278	35	*	3.16371	3.06257	-0.0468757	0.969089	0.979266
1	91009200	91009800	MergedBins_279	76	*	13.2132	6.65016	-0.990515	3.27426e-05	5.2417e-05
1	91010000	91010200	MergedBins_280	18	*	0.558303	1.57504	1.49627	0.101589	0.119131
1	91014600	91015000	MergedBins_281	323	*	2.97761	28.2632	3.24669	9.7698e-27	3.7017e-26
1	91020800	91021000	MergedBins_282	19	*	2.79151	1.66254	-0.747659	0.182396	0.206895
1	91024600	91025400	MergedBins_283	345	*	6.51353	30.1882	2.21247	3.01218e-21	9.79002e-21
1	91025600	91026200	MergedBins_284	152	*	1.30271	13.3003	3.35188	1.69182e-13	4.20108e-13
1	91026600	91027200	MergedBins_285	564	*	9.30504	49.3512	2.407	1.60508e-36	7.51991e-36
1	91027800	91028200	MergedBins_286	260	*	28.6595	22.7505	-0.333115	0.0262077	0.0328863
1	91033400	91033600	MergedBins_287	195	*	1.48881	17.0629	3.51863	2.05433e-17	5.91419e-17
1	91039600	91040000	MergedBins_288	101	*	2.23321	8.83771	1.98455	1.86142e-06	3.23592e-06
1	91040200	91040600	MergedBins_289	28	*	2.04711	2.45006	0.259227	0.738403	0.765031
1	91041400	91041800	MergedBins_290	5	*	4.65252	0.43751	-3.41062	9.54161e-09	1.90545e-08
1	91043200	91043400	MergedBins_291	0	*	2.41931	0	-8.11106	3.66154e-07	6.66814e-07
1	91048600	91048800	MergedBins_292	42	*	1.86101	3.67509	0.981693	0.0683456	0.0817641
1	91049400	91050000	MergedBins_293	567	*	21.4016	49.6137	1.21302	3.61511e-17	1.03337e-16
1	91075000	91075200	MergedBins_294	16	*	31.451	1.40003	-4.48958	1.45107e-66	1.19156e-65
1	91077000	91077400	MergedBins_295	73	*	12.841	6.38765	-1.0074	3.2692e-05	5.23434e-05
1	91077600	91078000	MergedBins_296	773	*	8.93284	67.6391	2.92067	9.46314e-58	6.74974e-57
1	91078400	91078800	MergedBins_297	771	*	24.007	67.4641	1.49066	1.09176e-29	4.39466e-29
1	91081800	91082200	MergedBins_298	790	*	10.0494	69.1266	2.78213	6.44042e-57	4.50829e-56
1	91087000	91087200	MergedBins_299	0	*	1.48881	0	-7.41062	0.000109441	0.000167597
1	91087600	91089000	MergedBins_300	788	*	49.6889	68.9516	0.47266	3.9402e-06	6.65602e-06
1	91089600	91090400	MergedBins_301	542	*	21.4016	47.4261	1.14796	2.47786e-15	6.62505e-15
1	91094200	91094600	MergedBins_302	49	*	0.930504	4.2876	2.20409	0.000116843	0.000178666
1	91094800	91095200	MergedBins_303	12	*	0.558303	1.05002	0.911304	0.41425	0.446307
1	91095400	91095800	MergedBins_304	43	*	1.67491	3.76259	1.16764	0.0340018	0.0418436
1	91098000	91098200	MergedBins_305	581	*	2.41931	50.8387	4.39326	2.36315e-54	1.5779e-53
1	91107200	91107400	MergedBins_306	33	*	46.153	2.88757	-3.9985	2.11303e-90	2.57926e-89
1	91109000	91110000	MergedBins_307	752	*	42.0588	65.8015	0.645714	3.31144e-09	6.79932e-09
1	91110200	91110400	MergedBins_308	34	*	33.1259	2.97507	-3.47697	1.06658e-58	7.72465e-58
1	91121600	91122000	MergedBins_309	26	*	21.5877	2.27505	-3.24624	1.85053e-36	8.65547e-36
1	91201400	91201800	MergedBins_310	2	*	3.72202	0.175004	-4.41062	1.40033e-08	2.75984e-08
1	91219800	91220200	MergedBins_311	62	*	2.23321	5.42513	1.28054	0.00538415	0.00718078
1	91965600	91965800	MergedBins_312	683	*	0.372202	59.7639	7.32705	1.78545e-110	3.16973e-109
1	92010000	92010400	MergedBins_313	1137	*	0.186101	99.4898	9.06232	3.4024e-188	2.01134e-186
1	92046000	92046400	MergedBins_314	0	*	2.23321	0	-7.99559	1.1449e-06	2.0145e-06
1	92091600	92091800	MergedBins_315	2	*	0.372202	0.175004	-1.0887	0.597431	0.628725
1	92096800	92097200	MergedBins_316	488	*	2.97761	42.701	3.84204	1.97562e-43	1.0527e-42
1	92097600	92098000	MergedBins_317	4	*	0.558303	0.350008	-0.673658	0.687282	0.716405
1	92102200	92102400	MergedBins_318	1190	*	0.186101	104.127	9.12805	3.62852e-197	2.5447e-195
1	92108000	92108200	MergedBins_319	76	*	0.930504	6.65016	2.8373	2.91228e-08	5.66159e-08
1	92119800	92120200	MergedBins_320	0	*	1.48881	0	-7.41062	0.000109441	0.000167597
1	92127400	92127800	MergedBins_321	82	*	4.28032	7.17517	0.745294	0.0349242	0.0428712
1	92138200	92138600	MergedBins_322	150	*	0.558303	13.1253	4.55516	2.34875e-21	7.66025e-21
1	93411800	93412000	MergedBins_323	0	*	1.67491	0	-7.58055	3.50006e-05	5.545e-05
1	93463200	93463400	MergedBins_324	22	*	0.186101	1.92505	3.37074	0.00275469	0.00378062
1	93584600	93585000	MergedBins_325	56	*	1.11661	4.90011	2.1337	0.000284192	0.000425121
1	93585800	93586200	MergedBins_326	0	*	0.372202	0	-5.41062	0.102281	0.119131
1	93590200	93590400	MergedBins_327	0	*	0.186101	0	-4.41062	0.319814	0.349765
1	97709200	97709600	MergedBins_328	457	*	0.372202	39.9884	6.74735	4.23056e-73	3.87093e-72
1	97718400	97719000	MergedBins_329	18	*	31.2649	1.57504	-4.31109	1.13348e-64	8.96227e-64
1	97738000	97738200	MergedBins_330	13	*	2.79151	1.13753	-1.29515	0.0246488	0.0309646
1	97821200	97821400	MergedBins_331	604	*	34.8009	52.8512	0.602814	5.99479e-07	1.08006e-06
1	97840200	97840400	MergedBins_332	7	*	13.3993	0.612514	-4.45127	6.92097e-29	2.73712e-28
1	97849000	97849400	MergedBins_333	2946	*	1.86101	257.781	7.11392	1.39134e-297	2.45462e-295
1	97849800	97851400	MergedBins_334	1158	*	45.7808	101.327	1.14621	4.6979e-31	1.95086e-30
1	97860000	97860200	MergedBins_335	4	*	5.02472	0.350008	-3.84358	3.09142e-10	6.68171e-10
1	97861200	97861400	MergedBins_336	295	*	3.90812	25.8131	2.72356	8.29426e-22	2.74957e-21
1	97864200	97865000	MergedBins_337	663	*	36.2897	58.0139	0.676839	7.67565e-09	1.541e-08
1	97865600	97865800	MergedBins_338	81	*	0.744403	7.08767	3.25115	1.27576e-09	2.66802e-09
1	97866200	97866600	MergedBins_339	23	*	8.37454	2.01255	-2.05699	3.30206e-09	6.78129e-09
1	97872200	97872400	MergedBins_340	2	*	1.11661	0.175004	-2.67366	0.0158326	0.0201745
1	97873400	97874200	MergedBins_341	276	*	11.3522	24.1506	1.08909	6.48108e-08	1.2357e-07
1	97879000	97879600	MergedBins_342	22	*	10.4216	1.92505	-2.43662	1.19217e-13	2.99128e-13
1	97883000	97883400	MergedBins_343	21	*	21.2155	1.83754	-3.52927	1.6469e-38	8.01172e-38
1	97885600	97885800	MergedBins_344	105	*	47.4557	9.18771	-2.3688	6.98727e-56	4.8047e-55
1	97890000	97890400	MergedBins_345	1279	*	6.14133	111.915	4.18771	1.30086e-115	2.57684e-114
1	97894200	97894600	MergedBins_346	46	*	39.2673	4.02509	-3.28623	5.25587e-66	4.26935e-65
1	97895600	97895800	MergedBins_347	12	*	20.8433	1.05002	-4.31109	1.614e-43	8.6321e-43
1	97900400	97900600	MergedBins_348	0	*	0.372202	0	-5.41062	0.102281	0.119131
1	97902200	97903000	MergedBins_349	108	*	5.95523	9.45022	0.666192	0.0261397	0.0328046
1	97903600	97904000	MergedBins_350	0	*	1.11661	0	-6.99559	0.00107	0.00151206
1	97904800	97905400	MergedBins_351	223	*	9.11894	19.513	1.09749	1.09487e-06	1.9468e-06
1	97910800	97911000	MergedBins_352	0	*	1.30271	0	-7.21798	0.000342201	0.000504675
1	97911600	97911800	MergedBins_353	571	*	0.186101	49.9637	8.06865	5.89851e-94	7.74419e-93
1	97916000	97916200	MergedBins_354	0	*	2.79151	0	-8.31751	3.74505e-08	7.20241e-08
1	97956600	97957000	MergedBins_355	26	*	1.30271	2.27505	0.804389	0.254368	0.283409
1	97957200	97957800	MergedBins_356	182	*	6.14133	15.9254	1.3747	2.52431e-07	4.65111e-07
1	97962400	97963200	MergedBins_357	778	*	5.95523	68.0766	3.51493	2.59348e-65	2.07829e-64
1	97963400	97964600	MergedBins_358	1000	*	9.67724	87.502	3.17665	1.31579e-78	1.29413e-77
1	97970200	97970400	MergedBins_359	4	*	5.39692	0.350008	-3.94668	4.09319e-11	9.15353e-11
1	97971800	97972000	MergedBins_360	2	*	19.5406	0.175004	-6.80294	2.73347e-49	1.62612e-48
1	98033200	98033400	MergedBins_361	0	*	1.48881	0	-7.41062	0.000109441	0.000167597
1	98082200	98082400	MergedBins_362	0	*	1.67491	0	-7.58055	3.50006e-05	5.545e-05
1	98085400	98085600	MergedBins_363	0	*	2.60541	0	-8.21798	1.17101e-07	2.19159e-07
1	98088000	98088400	MergedBins_364	1242	*	3.72202	108.678	4.86783	2.72479e-118	5.76135e-117
1	104774600	104775000	MergedBins_365	892	*	0.372202	78.0518	7.7122	3.15047e-145	1.04623e-143
1	105604600	105605000	MergedBins_366	670	*	0.744403	58.6264	6.29932	8.51342e-105	1.37715e-103
1	105629600	105630000	MergedBins_367	1	*	0.930504	0.087502	-3.41062	0.0147242	0.0188088
1	106174200	106174600	MergedBins_368	811	*	1.30271	70.9642	5.76751	6.60055e-81	6.73841e-80
1	106177600	106177800	MergedBins_369	574	*	1.48881	50.2262	5.07621	3.81349e-56	2.63352e-55
1	106178400	106178600	MergedBins_370	270	*	5.39692	23.6256	2.13014	2.42146e-16	6.71267e-16
1	106184000	106184200	MergedBins_371	50	*	2.23321	4.3751	0.970198	0.0459864	0.0557774
1	106215000	106215400	MergedBins_372	16	*	1.86101	1.40003	-0.410624	0.618339	0.649397
1	106218000	106218400	MergedBins_373	96	*	2.60541	8.4002	1.68891	2.36304e-05	3.80723e-05
1	106219200	106219600	MergedBins_374	21	*	4.28032	1.83754	-1.21994	0.00644495	0.00853806
1	106260000	106260200	MergedBins_375	0	*	0.930504	0	-6.73255	0.0033457	0.00451492
1	106305400	106305800	MergedBins_376	0	*	3.34982	0	-8.58055	1.22503e-09	2.56573e-09
1	106385600	106385800	MergedBins_377	0	*	3.34982	0	-8.58055	1.22503e-09	2.56573e-09
1	106613600	106613800	MergedBins_378	134	*	1.30271	11.7253	3.17004	1.13651e-11	2.61992e-11
1	106619600	106619800	MergedBins_379	0	*	0.372202	0	-5.41062	0.102281	0.119131
1	106627000	106627200	MergedBins_380	0	*	2.23321	0	-7.99559	1.1449e-06	2.0145e-06
1	106670600	106670800	MergedBins_381	81	*	0.930504	7.08767	2.92923	4.88325e-09	9.87992e-09
1	106684400	106685000	MergedBins_382	182	*	4.09422	15.9254	1.95967	1.39683e-10	3.06126e-10
1	106686000	106686200	MergedBins_383	124	*	0.558303	10.8503	4.28054	2.82255e-17	8.08049e-17
1	106687000	106687600	MergedBins_384	436	*	4.09422	38.1509	3.22006	2.01929e-35	9.16757e-35
1	118477000	118477200	MergedBins_385	1	*	0.186101	0.087502	-1.0887	0.537347	0.570707
1	118494800	118495200	MergedBins_386	0	*	1.11661	0	-6.99559	0.00107	0.00151206
1	118511800	118512400	MergedBins_387	904	*	7.63013	79.1019	3.37393	6.77579e-74	6.27608e-73
1	118514200	118514400	MergedBins_388	67	*	1.86101	5.86264	1.65547	0.000557569	0.000811277
1	118514800	118515000	MergedBins_389	0	*	0.930504	0	-6.73255	0.0033457	0.00451492
1	118516800	118517400	MergedBins_390	273	*	23.2626	23.8881	0.038277	0.847784	0.867845
1	118522000	118522400	MergedBins_391	2	*	9.11894	0.175004	-5.70341	3.30255e-22	1.10617e-21
1	118524200	118524800	MergedBins_392	77	*	2.97761	6.73766	1.17809	0.00323744	0.00441739
1	118525400	118526600	MergedBins_393	1069	*	24.9375	93.5397	1.90726	5.5918e-54	3.68361e-53
1	118527800	118528800	MergedBins_394	1501	*	22.3321	131.341	2.55612	1.1447e-99	1.6873e-98
1	118529200	118529600	MergedBins_395	246	*	11.1661	21.5255	0.946928	4.6596e-06	7.84427e-06
1	118530600	118531800	MergedBins_396	331	*	4.65252	28.9632	2.63814	1.01471e-23	3.54708e-23
1	118532000	118532800	MergedBins_397	131	*	3.16371	11.4628	1.85726	1.45849e-07	2.71164e-07
1	118533000	118533400	MergedBins_398	19	*	1.48881	1.66254	0.159232	0.955584	0.966714
1	118533800	118535200	MergedBins_399	1531	*	11.9105	133.966	3.49156	1.74101e-126	4.33946e-125
1	118538200	118538400	MergedBins_400	0	*	10.2355	0	-10.192	5.87873e-28	2.2857e-27
1	118539800	118540400	MergedBins_401	69	*	24.7514	6.03764	-2.03545	1.27498e-24	4.58612e-24
1	118540800	118541200	MergedBins_402	117	*	15.0742	10.2377	-0.558181	0.00886338	0.0116192
1	118542400	118542800	MergedBins_403	32	*	46.8974	2.80007	-4.06598	7.0717e-93	9.05289e-92
1	118564800	118565000	MergedBins_404	0	*	2.04711	0	-7.87006	3.57989e-06	6.07007e-06
1	118568800	118569200	MergedBins_405	407	*	2.41931	35.6133	3.87975	1.26267e-36	5.93046e-36
1	118569400	118569800	MergedBins_406	26	*	2.41931	2.27505	-0.0886959	0.992535	0.998371
1	118604800	118605200	MergedBins_407	98	*	0.558303	8.5752	3.94105	3.10888e-13	7.65592e-13
1	118983200	118983600	MergedBins_408	695	*	0.186101	60.8139	8.35217	1.6693e-114	3.21091e-113
1	119480400	119480600	MergedBins_409	50	*	6.69963	4.3751	-0.614765	0.0645041	0.0773323
1	119704200	119704400	MergedBins_410	5	*	0.372202	0.43751	0.233232	1	1
1	119705000	119705200	MergedBins_411	210	*	0.744403	18.3754	4.62555	1.04858e-29	4.22236e-29
1	119738400	119738600	MergedBins_412	559	*	2.23321	48.9136	4.45305	1.32994e-52	8.49338e-52
1	119764000	119764400	MergedBins_413	37	*	0.930504	3.23758	1.79883	0.00434445	0.00583064
1	119794200	119794400	MergedBins_414	0	*	0.186101	0	-4.41062	0.319814	0.349765
1	121317800	121318000	MergedBins_415	0	*	0.186101	0	-4.41062	0.319814	0.349765
1	125567800	125568000	MergedBins_416	1	*	5.39692	0.087502	-5.94668	9.08887e-14	2.28915e-13
1	126191800	126192000	MergedBins_417	41	*	4.09422	3.58758	-0.190575	0.715011	0.743456
1	126277800	126278000	MergedBins_418	0	*	0.558303	0	-5.99559	0.0327109	0.0403208
1	126305000	126305400	MergedBins_419	0	*	0.558303	0	-5.99559	0.0327109	0.0403208
1	126332400	126332800	MergedBins_420	0	*	1.67491	0	-7.58055	3.50006e-05	5.545e-05
1	126370800	126371200	MergedBins_421	83	*	4.83862	7.26267	0.585904	0.086017	0.101987
1	126381600	126381800	MergedBins_422	30	*	1.30271	2.62506	1.01084	0.126675	0.146171
1	126494800	126495200	MergedBins_423	110	*	2.79151	9.62523	1.78577	2.67988e-06	4.62527e-06
1	126643800	126644000	MergedBins_424	4	*	2.79151	0.350008	-2.99559	3.50424e-05	5.55006e-05
1	126649600	126649800	MergedBins_425	0	*	8.74674	0	-9.96521	5.37187e-24	1.88717e-23
1	126680200	126680600	MergedBins_426	54	*	22.7043	4.72511	-2.26455	5.68633e-26	2.11477e-25
1	126734000	126734200	MergedBins_427	0	*	4.09422	0	-8.87006	1.28154e-11	2.93805e-11
1	126823600	126823800	MergedBins_428	61	*	0.930504	5.33762	2.52011	3.83843e-06	6.48797e-06
1	126825400	126825800	MergedBins_429	45	*	3.53592	3.93759	0.15523	0.795281	0.820197
1	126828800	126829200	MergedBins_430	0	*	5.21082	0	-9.21798	1.37123e-14	3.56085e-14
1	126829800	126830000	MergedBins_431	553	*	0.558303	48.3886	6.43748	4.73813e-87	5.38754e-86
1	127326800	127327000	MergedBins_432	15	*	4.28032	1.31253	-1.70537	0.000319632	0.000477313
1	127335600	127336000	MergedBins_433	127	*	1.48881	11.1128	2.89999	1.5677e-10	3.43175e-10
1	127403800	127404200	MergedBins_434	0	*	1.11661	0	-6.99559	0.00107	0.00151206
1	127427000	127427200	MergedBins_435	666	*	0.558303	58.2764	6.70572	1.20172e-105	1.98662e-104
1	127648200	127648600	MergedBins_436	1357	*	1.30271	118.74	6.51015	9.50434e-137	2.78736e-135
1	128109200	128109600	MergedBins_437	1660	*	0.558303	145.253	8.02331	7.02271e-271	9.66993e-269
1	128142400	128142600	MergedBins_438	0	*	6.32743	0	-9.49809	1.46719e-17	4.239e-17
1	128143200	128143600	MergedBins_439	0	*	1.30271	0	-7.21798	0.000342201	0.000504675
1	128155400	128155800	MergedBins_440	44	*	1.11661	3.85009	1.78577	0.00400536	0.00538644
1	131061800	131062000	MergedBins_441	251	*	0.930504	21.963	4.56092	5.03863e-35	2.26207e-34
1	131080800	131081200	MergedBins_442	10	*	3.16371	0.87502	-1.85423	0.00117324	0.0016532
1	131081600	131081800	MergedBins_443	69	*	0.930504	6.03764	2.6979	2.72497e-07	5.01265e-07
1	131082200	131082600	MergedBins_444	121	*	3.72202	10.5877	1.50824	8.96516e-06	1.48883e-05
1	131083000	131083400	MergedBins_445	102	*	3.16371	8.92521	1.49627	5.33193e-05	8.36035e-05
1	131083600	131084000	MergedBins_446	7	*	1.67491	0.612514	-1.45127	0.0697812	0.0834286
1	131086800	131087000	MergedBins_447	141	*	4.28032	12.3378	1.52729	1.25443e-06	2.20174e-06
1	131090000	131090400	MergedBins_448	59	*	3.90812	5.16262	0.40163	0.327451	0.35781
1	131094800	131095200	MergedBins_449	178	*	13.3993	15.5754	0.217113	0.31215	0.344356
1	131398800	131399200	MergedBins_450	0	*	1.48881	0	-7.41062	0.000109441	0.000167597
1	131475000	131475200	MergedBins_451	49	*	1.67491	4.2876	1.35609	0.010846	0.0140021
1	131503600	131504000	MergedBins_452	296	*	1.86101	25.9006	3.79883	9.33489e-27	3.53811e-26
1	131924400	131924800	MergedBins_453	4	*	21.0294	0.350008	-5.90887	1.82316e-50	1.11393e-49
1	131928000	131928400	MergedBins_454	22	*	36.848	1.92505	-4.25862	1.94664e-75	1.84546e-74
1	131929600	131929800	MergedBins_455	21	*	23.8209	1.83754	-3.69638	1.09325e-44	5.98056e-44
1	131934600	131934800	MergedBins_456	114	*	9.30504	9.97523	0.100338	0.744126	0.770749
1	131936000	131936200	MergedBins_457	0	*	6.32743	0	-9.49809	1.46719e-17	4.239e-17
1	132028600	132029000	MergedBins_458	14	*	4.46642	1.22503	-1.8663	7.92491e-05	0.000123421
1	132030600	132031000	MergedBins_459	80	*	2.79151	7.00016	1.32634	0.00106124	0.00151206
1	132987200	132988200	MergedBins_460	220	*	22.146	19.2505	-0.202154	0.240325	0.269063
1	132989800	132990200	MergedBins_461	41	*	5.76913	3.58758	-0.68534	0.0589748	0.0709294
1	132998400	132998800	MergedBins_462	477	*	3.16371	41.7385	3.72169	7.65585e-42	3.96888e-41
1	133007800	133008000	MergedBins_463	0	*	5.02472	0	-9.16551	4.2876e-14	1.09207e-13
1	133107000	133107600	MergedBins_464	12	*	1.30271	1.05002	-0.311088	0.834973	0.855894
1	133108000	133108200	MergedBins_465	48	*	3.34982	4.2001	0.326342	0.491313	0.524777
1	133290200	133291000	MergedBins_466	54	*	3.34982	4.72511	0.496267	0.252712	0.281759
1	133291400	133291800	MergedBins_467	226	*	2.60541	19.7755	2.92413	6.92614e-18	2.02284e-17
1	133404400	133404800	MergedBins_468	1006	*	2.79151	88.0271	4.97883	9.85578e-97	1.37895e-95
1	133642400	133642600	MergedBins_469	0	*	1.48881	0	-7.41062	0.000109441	0.000167597
1	133658800	133659000	MergedBins_470	0	*	24.7514	0	-11.4659	1.41544e-66	1.16315e-65
1	133660600	133660800	MergedBins_471	559	*	4.28032	48.9136	3.51445	2.36449e-47	1.3552e-46
1	134631200	134631400	MergedBins_472	325	*	5.39692	28.4382	2.39762	1.43106e-21	4.71355e-21
1	134767200	134767600	MergedBins_473	45	*	1.86101	3.93759	1.08123	0.0403943	0.0492912
1	134798200	134798400	MergedBins_474	39	*	3.53592	3.41258	-0.0512211	0.988945	0.995292
1	134810400	134810600	MergedBins_475	0	*	8.37454	0	-9.90248	5.25213e-23	1.8003e-22
1	134819000	134819400	MergedBins_476	900	*	3.90812	78.7518	4.33277	6.36545e-83	6.72962e-82
1	134821600	134822000	MergedBins_477	266	*	7.07183	23.2755	1.71866	5.14874e-13	1.25317e-12
1	134826000	134826200	MergedBins_478	0	*	13.9576	0	-10.6394	7.36484e-38	3.54763e-37
1	134831600	134832200	MergedBins_479	194	*	12.0966	16.9754	0.488849	0.0209402	0.0264351
1	134848800	134849400	MergedBins_480	30	*	8.74674	2.62506	-1.73639	9.0541e-08	1.71555e-07
1	134852800	134853200	MergedBins_481	14	*	0.930504	1.22503	0.396731	0.806346	0.830379
1	134882400	134882600	MergedBins_482	8	*	2.97761	0.700016	-2.0887	0.000616121	0.000893134
1	134888000	134888400	MergedBins_483	62	*	0.744403	5.42513	2.8655	4.93459e-07	8.92749e-07
1	134889000	134889600	MergedBins_484	8	*	13.9576	0.700016	-4.31751	1.54009e-29	6.19271e-29
1	134890600	134890800	MergedBins_485	0	*	21.4016	0	-11.2561	1.15573e-57	8.22267e-57
1	134906600	134906800	MergedBins_486	30	*	0.558303	2.62506	2.23323	0.00421884	0.00566678
1	134914800	134915000	MergedBins_487	59	*	0.558303	5.16262	3.20898	3.32487e-07	6.09039e-07
1	134933800	134934000	MergedBins_488	557	*	0.744403	48.7386	6.03284	3.20933e-86	3.60922e-85
1	134951600	134952000	MergedBins_489	153	*	1.11661	13.3878	3.58373	4.65771e-14	1.18393e-13
1	134954200	134954400	MergedBins_490	37	*	1.67491	3.23758	0.950833	0.0994616	0.117177
1	134954600	134955000	MergedBins_491	946	*	0.558303	82.7769	7.21204	4.00159e-152	1.50607e-150
1	135385200	135385600	MergedBins_492	865	*	0.930504	75.6893	6.34593	4.10195e-135	1.17253e-133
1	135682800	135683000	MergedBins_493	559	*	0.186101	48.9136	8.03801	5.96368e-92	7.52356e-91
1	135801600	135802000	MergedBins_494	12	*	25.3097	1.05002	-4.5912	1.89541e-54	1.26858e-53
1	135806200	135806600	MergedBins_495	24	*	16.9352	2.10005	-3.01153	6.54653e-27	2.49635e-26
1	135810600	135811000	MergedBins_496	77	*	210.666	6.73766	-4.96657	0	0
1	135841800	135842400	MergedBins_497	4559	*	217.366	398.922	0.875981	9.23936e-79	9.11903e-78
1	135850600	135851000	MergedBins_498	1303	*	834.848	114.015	-2.87229	0	0
1	135851200	135851600	MergedBins_499	972	*	503.403	85.052	-2.5653	0	0
1	135854200	135854600	MergedBins_500	69	*	2.97761	6.03764	1.01983	0.0129667	0.0166656
1	136330400	136330600	MergedBins_501	626	*	0.558303	54.7763	6.61636	2.91584e-99	4.2646e-98
1	137927000	137927200	MergedBins_502	42	*	5.02472	3.67509	-0.451266	0.252548	0.28166
1	137931600	137932000	MergedBins_503	812	*	4.28032	71.0517	4.05308	5.38657e-73	4.91275e-72
1	137951400	137951800	MergedBins_504	112	*	23.4487	9.80023	-1.25862	6.72317e-12	1.56389e-11
1	137955600	137956000	MergedBins_505	841	*	6.14133	73.5892	3.58287	3.29781e-71	2.93194e-70
1	138525200	138525400	MergedBins_506	4	*	0.744403	0.350008	-1.0887	0.277356	0.308322
1	138529000	138529400	MergedBins_507	5	*	6.14133	0.43751	-3.81116	3.59741e-12	8.48513e-12
1	138612200	138612600	MergedBins_508	154	*	5.76913	13.4753	1.22389	1.29422e-05	2.11538e-05
1	139012600	139012800	MergedBins_509	1756	*	0.186101	153.654	9.68938	1.00632e-291	1.69587e-289
1	139029800	139030200	MergedBins_510	19	*	4.28032	1.66254	-1.36433	0.00270014	0.00370891
1	139051800	139052000	MergedBins_511	640	*	1.48881	56.0013	5.23323	6.75532e-63	5.21e-62
1	139055400	139055800	MergedBins_512	206	*	1.86101	18.0254	3.27588	1.27459e-17	3.70054e-17
1	143606400	143606600	MergedBins_513	146	*	2.23321	12.7753	2.51617	8.75587e-11	1.93734e-10
1	150661400	150661600	MergedBins_514	0	*	0.186101	0	-4.41062	0.319814	0.349765
1	150674200	150674400	MergedBins_515	62	*	12.0966	5.42513	-1.15687	5.51996e-06	9.25403e-06
1	150735200	150735800	MergedBins_516	554	*	7.07183	48.4761	2.77712	2.5957e-40	1.30723e-39
1	150755600	150755800	MergedBins_517	27	*	1.86101	2.36256	0.344264	0.638426	0.668937
1	150757400	150757800	MergedBins_518	100	*	2.04711	8.7502	2.09573	1.03947e-06	1.85062e-06
1	150761200	150761400	MergedBins_519	259	*	2.97761	22.663	2.92811	2.51548e-20	7.92917e-20
1	150830400	150830600	MergedBins_520	162	*	1.30271	14.1753	3.4438	1.62609e-14	4.20911e-14
1	150851200	150851400	MergedBins_521	31	*	8.00234	2.71256	-1.56076	2.67681e-06	4.62068e-06
1	150880200	150880600	MergedBins_522	29	*	2.23321	2.53756	0.184323	0.837531	0.857894
1	150892200	150892600	MergedBins_523	902	*	1.86101	78.9268	5.40636	1.16032e-88	1.35764e-87
1	150894000	150894200	MergedBins_524	0	*	0.930504	0	-6.73255	0.0033457	0.00451492
1	150911200	150911400	MergedBins_525	56	*	4.09422	4.90011	0.259227	0.552721	0.585493
1	150919600	150919800	MergedBins_526	604	*	7.63013	52.8512	2.79216	5.40187e-44	2.91551e-43
1	150935600	150935800	MergedBins_527	232	*	0.372202	20.3005	5.76929	6.3932e-36	2.94395e-35
1	150937000	150937200	MergedBins_528	16	*	0.930504	1.40003	0.589376	0.491716	0.525108
1	150937600	150937800	MergedBins_529	103	*	1.86101	9.01271	2.27588	2.32459e-07	4.29574e-07
1	150953000	150953400	MergedBins_530	1508	*	3.53592	131.953	5.2218	5.93951e-146	1.99e-144
1	150969200	150969400	MergedBins_531	824	*	3.34982	72.1017	4.42788	1.16827e-76	1.12551e-75
1	150970200	150971600	MergedBins_532	1888	*	20.4711	165.204	3.01259	8.68467e-142	2.73144e-140
1	150975800	150976200	MergedBins_533	25	*	3.34982	2.18755	-0.614765	0.220398	0.247934
1	150977200	150977400	MergedBins_534	719	*	1.30271	62.914	5.5938	1.70712e-71	1.52372e-70
1	150977800	150978000	MergedBins_535	0	*	1.86101	0	-7.73255	1.11937e-05	1.83597e-05
1	150988800	150989200	MergedBins_536	133	*	14.1437	11.6378	-0.281341	0.199077	0.224943
1	151346400	151346800	MergedBins_537	301	*	8.56064	26.3381	1.62136	1.161e-13	2.91503e-13
1	151347200	151347400	MergedBins_538	210	*	5.76913	18.3754	1.67135	3.08415e-10	6.66982e-10
1	151363000	151363800	MergedBins_539	1228	*	108.869	107.453	-0.0188938	0.8138	0.837231
1	151498400	151498800	MergedBins_540	1206	*	7.44403	105.527	3.82539	7.67039e-105	1.24434e-103
1	151952600	151952800	MergedBins_541	0	*	0.186101	0	-4.41062	0.319814	0.349765
1	152006400	152006800	MergedBins_542	14	*	24.007	1.22503	-4.29257	8.10695e-50	4.87151e-49
1	152546000	152546400	MergedBins_543	5	*	18.0518	0.43751	-5.36668	1.17233e-41	6.04695e-41
1	152548000	152548200	MergedBins_544	14	*	0.930504	1.22503	0.396731	0.806346	0.830379
1	152603600	152604200	MergedBins_545	0	*	1.30271	0	-7.21798	0.000342201	0.000504675
1	152607400	152608000	MergedBins_546	158	*	9.86334	13.8253	0.487164	0.0390537	0.0477586
1	152618400	152618800	MergedBins_547	37	*	5.95523	3.23758	-0.879242	0.0149018	0.0190313
1	152620800	152621000	MergedBins_548	23	*	7.07183	2.01255	-1.81306	7.85342e-07	1.4084e-06
1	152622000	152622200	MergedBins_549	525	*	4.09422	45.9386	3.48805	2.2221e-44	1.20973e-43
1	152622600	152623000	MergedBins_550	795	*	0.372202	69.5641	7.54612	3.53029e-129	9.4233e-128
1	152886400	152886600	MergedBins_551	0	*	0.372202	0	-5.41062	0.102281	0.119131
1	152894000	152894400	MergedBins_552	178	*	3.16371	15.5754	2.29957	5.6425e-12	1.31522e-11
1	153219000	153219800	MergedBins_553	390	*	17.6796	34.1258	0.948779	6.49417e-09	1.30775e-08
1	153220000	153221800	MergedBins_554	1891	*	62.3438	165.466	1.40822	1.32824e-65	1.07046e-64
1	153223600	153223800	MergedBins_555	57	*	19.9128	4.98762	-1.99727	1.43825e-19	4.42729e-19
1	153226200	153226600	MergedBins_556	34	*	19.5406	2.97507	-2.71548	9.26976e-28	3.59426e-27
1	153227400	153227800	MergedBins_557	698	*	24.7514	61.0764	1.3031	7.74516e-23	2.64441e-22
1	153228600	153229200	MergedBins_558	218	*	101.611	19.0754	-2.41327	1.05285e-120	2.32636e-119
1	153230600	153231000	MergedBins_559	255	*	71.4627	22.313	-1.6793	3.8489e-52	2.43189e-51
1	153231600	153232000	MergedBins_560	178	*	43.7337	15.5754	-1.48948	3.24711e-27	1.2462e-26
1	153233400	153233600	MergedBins_561	41	*	26.6124	3.58758	-2.89102	6.49303e-40	3.24968e-39
1	153234400	153234800	MergedBins_562	48	*	26.4263	4.2001	-2.65348	3.58487e-36	1.66366e-35
1	153239200	153239400	MergedBins_563	77	*	36.2897	6.73766	-2.42924	2.15992e-44	1.17644e-43
1	153243600	153244000	MergedBins_564	40	*	24.7514	3.50008	-2.82205	2.72365e-36	1.26763e-35
1	153245000	153245400	MergedBins_565	0	*	0.930504	0	-6.73255	0.0033457	0.00451492
1	153245800	153246000	MergedBins_566	0	*	0.186101	0	-4.41062	0.319814	0.349765
1	153246400	153246800	MergedBins_567	216	*	1.67491	18.9004	3.49627	4.35065e-19	1.31698e-18
1	153302200	153303200	MergedBins_568	378	*	5.39692	33.0758	2.61557	1.0349e-26	3.91855e-26
1	153304200	153304400	MergedBins_569	39	*	3.34982	3.41258	0.0267814	0.938745	0.951915
1	153308000	153308600	MergedBins_570	5	*	1.86101	0.43751	-2.0887	0.00920908	0.0120612
1	153309400	153309600	MergedBins_571	157	*	1.48881	13.7378	3.20592	1.47659e-13	3.67632e-13
1	153311600	153312000	MergedBins_572	262	*	9.11894	22.9255	1.33002	1.24461e-09	2.60529e-09
1	153312200	153312800	MergedBins_573	0	*	3.72202	0	-8.73255	1.25297e-10	2.75078e-10
1	153315800	153316000	MergedBins_574	711	*	0.372202	62.214	7.38501	3.73704e-115	7.32551e-114
1	153317000	153317200	MergedBins_575	39	*	10.6077	3.41258	-1.63618	1.64899e-08	3.2358e-08
1	153323000	153323400	MergedBins_576	65	*	1.11661	5.68763	2.34871	3.72538e-05	5.89286e-05
1	153325400	153325600	MergedBins_577	1	*	1.48881	0.087502	-4.0887	0.000704961	0.00101605
1	155279800	155280000	MergedBins_578	55	*	8.93284	4.81261	-0.892299	0.00209948	0.00290683
1	155794000	155794400	MergedBins_579	0	*	1.11661	0	-6.99559	0.00107	0.00151206
1	155942400	155943000	MergedBins_580	257	*	2.97761	22.488	2.91693	3.97974e-20	1.2482e-19
1	156006000	156006200	MergedBins_581	812	*	5.39692	71.0517	3.71866	3.85383e-70	3.37577e-69
1	156471600	156471800	MergedBins_582	0	*	1.48881	0	-7.41062	0.000109441	0.000167597
1	156600400	156600800	MergedBins_583	924	*	1.48881	80.8519	5.76305	6.03356e-92	7.59475e-91
1	156866400	156866800	MergedBins_584	696	*	1.30271	60.9014	5.54689	3.85156e-69	3.30204e-68
1	157189600	157189800	MergedBins_585	0	*	1.30271	0	-7.21798	0.000342201	0.000504675
1	157360600	157360800	MergedBins_586	191	*	0.744403	16.7129	4.48873	1.0824e-26	4.09564e-26
1	157476400	157476600	MergedBins_587	525	*	0.744403	45.9386	5.94748	6.22444e-81	6.36019e-80
1	159340200	159340400	MergedBins_588	396	*	2.04711	34.6508	4.08123	1.82563e-36	8.54253e-36
1	160388600	160389000	MergedBins_589	22	*	2.60541	1.92505	-0.436619	0.477745	0.51101
1	160461000	160461400	MergedBins_590	0	*	5.02472	0	-9.16551	4.2876e-14	1.09207e-13
1	160540000	160540400	MergedBins_591	3	*	1.30271	0.262506	-2.31109	0.0154502	0.0197184
1	160569200	160569800	MergedBins_592	247	*	1.67491	21.613	3.68975	3.06693e-22	1.02817e-21
1	160571600	160571800	MergedBins_593	0	*	7.07183	0	-9.65855	1.53486e-19	4.69523e-19
1	160601000	160601400	MergedBins_594	18	*	1.67491	1.57504	-0.0886959	0.955584	0.966714
1	160607400	160607800	MergedBins_595	340	*	0.930504	29.7507	4.99877	2.54246e-49	1.51408e-48
1	160610200	160610400	MergedBins_596	62	*	3.16371	5.42513	0.778038	0.061041	0.0733207
1	160612600	160613000	MergedBins_597	298	*	0.558303	26.0756	5.54551	2.49028e-45	1.38239e-44
1	160625600	160625800	MergedBins_598	0	*	7.07183	0	-9.65855	1.53486e-19	4.69523e-19
1	160667800	160668200	MergedBins_599	35	*	1.11661	3.06257	1.45562	0.0268197	0.0335983
1	160715800	160716000	MergedBins_600	953	*	0.186101	83.3895	8.80764	1.28811e-157	5.21294e-156
1	160719000	160719400	MergedBins_601	174	*	0.372202	15.2254	5.35425	1.8112e-26	6.81447e-26
1	160744400	160744800	MergedBins_602	824	*	0.186101	72.1017	8.5978	6.78851e-136	1.95533e-134
1	160774200	160774400	MergedBins_603	25	*	1.86101	2.18755	0.233232	0.801559	0.825992
1	161012600	161012800	MergedBins_604	529	*	1.48881	46.2886	4.95843	1.53029e-51	9.56201e-51
1	161821800	161822000	MergedBins_605	0	*	2.23321	0	-7.99559	1.1449e-06	2.0145e-06
1	162678000	162678200	MergedBins_606	6	*	10.7938	0.525012	-4.36171	3.24569e-23	1.11865e-22
1	162679400	162679600	MergedBins_607	164	*	12.841	14.3503	0.160332	0.481023	0.514224
1	162705400	162705600	MergedBins_608	0	*	45.0364	0	-12.3295	1.52617e-120	3.36562e-119
1	162712600	162713000	MergedBins_609	208	*	3.72202	18.2004	2.28982	9.83976e-14	2.47606e-13
1	162715400	162715800	MergedBins_610	92	*	67.1824	8.05019	-3.06099	1.28247e-104	2.07158e-103
1	163246800	163247000	MergedBins_611	0	*	0.930504	0	-6.73255	0.0033457	0.00451492
1	163303800	163304200	MergedBins_612	0	*	3.16371	0	-8.49809	3.83046e-09	7.77174e-09
1	164437200	164437600	MergedBins_613	57	*	15.6325	4.98762	-1.64812	4.06922e-12	9.58396e-12
1	164438000	164438600	MergedBins_614	413	*	78.3485	36.1383	-1.11637	3.43994e-30	1.40218e-29
1	164439200	164439400	MergedBins_615	26	*	12.6549	2.27505	-2.47572	1.24146e-16	3.48171e-16
1	164441400	164441600	MergedBins_616	29	*	6.88573	2.53756	-1.44017	4.85974e-05	7.63915e-05
1	164443200	164443400	MergedBins_617	6	*	8.18844	0.525012	-3.96316	7.34926e-17	2.07347e-16
1	164444200	164444600	MergedBins_618	106	*	6.14133	9.27522	0.59483	0.0463603	0.0562069
1	164453400	164453800	MergedBins_619	12	*	26.4263	1.05002	-4.65348	3.44183e-57	2.42129e-56
1	164457600	164458000	MergedBins_620	0	*	21.5877	0	-11.2686	3.69614e-58	2.65309e-57
1	165229600	165230000	MergedBins_621	683	*	0.744403	59.7639	6.32705	9.43202e-107	1.58478e-105
1	165378600	165379000	MergedBins_622	334	*	3.53592	29.2257	3.04708	1.6002e-26	6.03469e-26
1	165385200	165385600	MergedBins_623	93	*	1.30271	8.13769	2.64311	1.52942e-07	2.84212e-07
1	165386000	165386600	MergedBins_624	162	*	3.72202	14.1753	1.92923	2.06494e-09	4.27175e-09
1	165631600	165632000	MergedBins_625	0	*	0.744403	0	-6.41062	0.0104614	0.0135226
1	165670800	165671200	MergedBins_626	0	*	0.372202	0	-5.41062	0.102281	0.119131
1	165672000	165672400	MergedBins_627	395	*	2.41931	34.5633	3.83657	2.09618e-35	9.51286e-35
1	165674800	165675000	MergedBins_628	60	*	3.72202	5.25012	0.496267	0.222853	0.250546
1	165678800	165679000	MergedBins_629	579	*	1.30271	50.6637	5.28137	3.61796e-57	2.54361e-56
1	165682200	165682400	MergedBins_630	46	*	1.11661	4.02509	1.8499	0.00259503	0.00357018
1	165696400	165696600	MergedBins_631	1	*	4.28032	0.087502	-5.61226	6.82174e-11	1.51444e-10
1	165700800	165701200	MergedBins_632	0	*	7.25793	0	-9.69603	4.90867e-20	1.53104e-19
1	165768400	165768600	MergedBins_633	818	*	0.372202	71.5767	7.58726	5.65947e-133	1.58958e-131
1	166117200	166117600	MergedBins_634	4	*	2.04711	0.350008	-2.54813	0.00122891	0.00172883
1	166121200	166121400	MergedBins_635	56	*	7.63013	4.90011	-0.638893	0.0390802	0.0477858
1	167024800	167025000	MergedBins_636	705	*	0.744403	61.6889	6.37278	1.48667e-110	2.64763e-109
1	168155400	168156000	MergedBins_637	274	*	2.04711	23.9756	3.5499	4.71518e-24	1.66372e-23
1	168158200	168158600	MergedBins_638	120	*	1.30271	10.5002	3.01084	2.96546e-10	6.42298e-10
1	168161000	168161400	MergedBins_639	667	*	5.95523	58.3639	3.29285	3.82664e-54	2.53858e-53
1	168210600	168210800	MergedBins_640	568	*	0.372202	49.7012	7.06105	2.5443e-91	3.16037e-90
1	168214000	168214200	MergedBins_641	704	*	0.372202	61.6014	7.37074	4.88691e-114	9.30492e-113
1	168240800	168241000	MergedBins_642	18	*	1.11661	1.57504	0.496267	0.606916	0.638172
1	168254800	168255000	MergedBins_643	0	*	0.930504	0	-6.73255	0.0033457	0.00451492
1	168268200	168269000	MergedBins_644	28	*	1.30271	2.45006	0.911304	0.180711	0.205004
1	168272600	168273000	MergedBins_645	809	*	6.88573	70.7892	3.36185	3.71666e-66	3.0234e-65
1	168274200	168274600	MergedBins_646	3	*	1.86101	0.262506	-2.82566	0.00114713	0.00161761
1	168287400	168287600	MergedBins_647	188	*	1.30271	16.4504	3.65854	3.64467e-17	1.04156e-16
1	168294400	168294600	MergedBins_648	21	*	4.09422	1.83754	-1.15581	0.0112982	0.0145692
1	168298400	168298800	MergedBins_649	183	*	11.5383	16.0129	0.472808	0.029875	0.0373099
1	168303000	168303400	MergedBins_650	81	*	1.11661	7.08767	2.66619	9.50259e-07	1.69581e-06
1	168304800	168306600	MergedBins_651	766	*	12.6549	67.0266	2.40504	5.00382e-49	2.96578e-48
1	168307800	168308400	MergedBins_652	102	*	1.30271	8.92521	2.77637	1.92377e-08	3.76714e-08
1	168308600	168309400	MergedBins_653	79	*	4.83862	6.91266	0.514645	0.138469	0.158904
1	168310600	168311000	MergedBins_654	166	*	2.97761	14.5253	2.28634	3.39502e-11	7.65132e-11
1	168315400	168315800	MergedBins_655	56	*	3.90812	4.90011	0.326342	0.44503	0.477943
1	168316000	168316400	MergedBins_656	481	*	9.11894	42.0885	2.20649	5.33457e-29	2.11565e-28
1	168317200	168317600	MergedBins_657	401	*	15.6325	35.0883	1.16645	6.223e-12	1.44844e-11
1	168323800	168324600	MergedBins_658	144	*	7.63013	12.6003	0.723677	0.00535731	0.00715005
1	168326800	168327400	MergedBins_659	224	*	2.23321	19.6005	3.1337	1.50331e-18	4.48096e-18
1	168328400	168329000	MergedBins_660	28	*	1.30271	2.45006	0.911304	0.180711	0.205004
1	168329600	168330000	MergedBins_661	99	*	2.04711	8.6627	2.08123	1.29327e-06	2.26744e-06
1	168330800	168331200	MergedBins_662	152	*	8.93284	13.3003	0.574269	0.0190628	0.0241298
1	168332000	168332800	MergedBins_663	437	*	8.74674	38.2384	2.1282	1.37029e-25	5.06115e-25
1	168333600	168334200	MergedBins_664	161	*	7.25793	14.0878	0.956819	0.000208258	0.000314533
1	168334800	168335200	MergedBins_665	535	*	3.53592	46.8136	3.72677	8.77806e-47	4.9931e-46
1	168335800	168336200	MergedBins_666	286	*	5.76913	25.0256	2.11698	3.91779e-17	1.11763e-16
1	168337600	168338000	MergedBins_667	12	*	12.2827	1.05002	-3.54813	7.18045e-23	2.45383e-22
1	168339400	168339600	MergedBins_668	3	*	1.11661	0.262506	-2.0887	0.0346889	0.0426055
1	168351200	168351800	MergedBins_669	29	*	12.0966	2.53756	-2.25308	2.62401e-14	6.75661e-14
1	168354600	168355000	MergedBins_670	214	*	6.51353	18.7254	1.52349	2.01385e-09	4.17142e-09
1	168356800	168357000	MergedBins_671	37	*	6.14133	3.23758	-0.923637	0.00955274	0.0124896
1	168357400	168358200	MergedBins_672	169	*	3.16371	14.7878	2.22472	4.09566e-11	9.15725e-11
1	168358800	168359200	MergedBins_673	101	*	0.558303	8.83771	3.98455	1.16424e-13	2.92251e-13
1	168359800	168360600	MergedBins_674	602	*	4.46642	52.6762	3.55996	3.10477e-51	1.93252e-50
1	168361000	168361600	MergedBins_675	1066	*	8.56064	93.2772	3.44573	6.4709e-88	7.46301e-87
1	168362000	168362200	MergedBins_676	65	*	0.558303	5.68763	3.34871	3.16217e-08	6.13473e-08
1	168363400	168364200	MergedBins_677	108	*	5.21082	9.45022	0.858837	0.00583671	0.00775778
1	168364400	168365200	MergedBins_678	106	*	5.95523	9.27522	0.639225	0.0337164	0.0415014
1	168365600	168366400	MergedBins_679	206	*	16.0047	18.0254	0.17154	0.387605	0.419401
1	168366800	168368000	MergedBins_680	550	*	22.146	48.1261	1.11977	4.87943e-15	1.28844e-14
1	168368200	168368800	MergedBins_681	354	*	4.46642	30.9757	2.79395	2.16464e-26	8.13072e-26
1	168369400	168369800	MergedBins_682	574	*	5.39692	50.2262	3.21823	3.74014e-46	2.09578e-45
1	168370800	168371200	MergedBins_683	817	*	1.11661	71.4892	6.00053	4.8398e-82	5.04117e-81
1	168371600	168372600	MergedBins_684	198	*	9.67724	17.3254	0.840221	0.000197033	0.000297739
1	168373600	168374200	MergedBins_685	1557	*	2.60541	136.241	5.7085	1.55482e-153	5.97124e-152
1	168375400	168376800	MergedBins_686	655	*	13.2132	57.3138	2.11691	1.94905e-37	9.32092e-37
1	168377000	168377400	MergedBins_687	12	*	1.11661	1.05002	-0.0886959	0.896802	0.914623
1	168377600	168378000	MergedBins_688	0	*	4.65252	0	-9.05448	4.19201e-13	1.02362e-12
1	168380000	168380200	MergedBins_689	0	*	1.30271	0	-7.21798	0.000342201	0.000504675
1	168381000	168381400	MergedBins_690	1	*	3.72202	0.087502	-5.41062	1.8298e-09	3.79576e-09
1	168385000	168385200	MergedBins_691	19	*	5.02472	1.66254	-1.59566	0.000194035	0.000293365
1	168392800	168393200	MergedBins_692	37	*	1.67491	3.23758	0.950833	0.0994616	0.117177
1	168393400	168393800	MergedBins_693	0	*	1.30271	0	-7.21798	0.000342201	0.000504675
1	168394000	168394600	MergedBins_694	62	*	3.90812	5.42513	0.473183	0.235149	0.263688
1	168396000	168396800	MergedBins_695	188	*	8.00234	16.4504	1.03963	1.82503e-05	2.95899e-05
1	168397000	168399200	MergedBins_696	2783	*	43.5476	243.518	2.48336	8.17283e-179	4.39426e-177
1	168399400	168400000	MergedBins_697	72	*	8.18844	6.30015	-0.378202	0.202531	0.228541
1	168400600	168401800	MergedBins_698	221	*	10.7938	19.338	0.841226	8.00183e-05	0.000124585
1	168402000	168402600	MergedBins_699	7	*	3.90812	0.612514	-2.67366	2.89683e-06	4.9898e-06
1	168407200	168407600	MergedBins_700	145	*	7.63013	12.6878	0.733661	0.00469119	0.00627809
1	168408400	168409200	MergedBins_701	354	*	74.9986	30.9757	-1.27573	7.47688e-36	3.43316e-35
1	168409400	168409600	MergedBins_702	172	*	1.67491	15.0504	3.16764	1.24618e-14	3.25708e-14
1	168410600	168411000	MergedBins_703	116	*	3.16371	10.1502	1.68182	3.24894e-06	5.58353e-06
1	168413000	168413400	MergedBins_704	275	*	4.09422	24.0631	2.55516	1.9157e-19	5.8539e-19
1	168413800	168414400	MergedBins_705	984	*	5.76913	86.102	3.89962	1.27715e-86	1.44059e-85
1	168414600	168414800	MergedBins_706	268	*	2.60541	23.4505	3.17004	4.30272e-22	1.43819e-21
1	168415000	168416000	MergedBins_707	764	*	5.02472	66.8516	3.73385	3.20331e-66	2.61334e-65
1	168416600	168416800	MergedBins_708	13	*	3.16371	1.13753	-1.47572	0.00686766	0.00906509
1	168419000	168420400	MergedBins_709	653	*	13.0271	57.1388	2.13296	1.32898e-37	6.36907e-37
1	168420800	168421400	MergedBins_710	51	*	4.09422	4.4626	0.124298	0.831791	0.85354
1	168423000	168423600	MergedBins_711	611	*	11.7244	53.4638	2.18905	3.59897e-36	1.66952e-35
1	168424600	168425000	MergedBins_712	0	*	7.63013	0	-9.76818	5.02058e-21	1.62149e-20
1	168425400	168426200	MergedBins_713	508	*	23.8209	44.451	0.899989	1.91401e-10	4.17524e-10
1	168426800	168427600	MergedBins_714	155	*	7.07183	13.5628	0.939501	0.000338026	0.000504048
1	169693800	169694200	MergedBins_715	0	*	66.0658	0	-12.8823	1.7186e-176	9.02544e-175
1	170194800	170195200	MergedBins_716	51	*	2.41931	4.4626	0.88329	0.0618306	0.0742375
1	170334800	170335000	MergedBins_717	178	*	0.186101	15.5754	6.38704	1.87061e-28	7.349e-28
1	170448400	170448600	MergedBins_718	0	*	0.186101	0	-4.41062	0.319814	0.349765
1	170506200	170506600	MergedBins_719	51	*	4.09422	4.4626	0.124298	0.831791	0.85354
1	170508400	170509000	MergedBins_720	0	*	12.4688	0	-10.4767	6.72998e-34	2.95789e-33
1	170586200	170586400	MergedBins_721	91	*	1.86101	7.96269	2.09717	3.30115e-06	5.66895e-06
1	170813200	170813400	MergedBins_722	618	*	0.558303	54.0763	6.5978	6.2197e-98	8.91201e-97
1	171129200	171129600	MergedBins_723	29	*	18.7962	2.53756	-2.88893	1.5593e-28	6.14095e-28
1	171142200	171142400	MergedBins_724	0	*	4.83862	0	-9.11106	1.34066e-13	3.34528e-13
1	171440000	171440200	MergedBins_725	0	*	5.95523	0	-9.41062	1.43448e-16	4.00215e-16
1	172003800	172004200	MergedBins_726	280	*	14.1437	24.5006	0.79266	2.1884e-05	3.5314e-05
1	172191800	172192000	MergedBins_727	14	*	1.67491	1.22503	-0.451266	0.608952	0.640074
1	172216800	172217000	MergedBins_728	1	*	16.0047	0.087502	-7.51496	1.56848e-41	8.07923e-41
1	172217800	172218000	MergedBins_729	0	*	11.7244	0	-10.3879	6.43336e-32	2.72057e-31
1	172505800	172507000	MergedBins_730	333	*	9.86334	29.1382	1.56276	2.28411e-14	5.89214e-14
1	176798800	176799000	MergedBins_731	0	*	1.11661	0	-6.99559	0.00107	0.00151206
1	176800000	176800400	MergedBins_732	53	*	5.39692	4.63761	-0.218756	0.590083	0.621804
1	177061800	177062000	MergedBins_733	556	*	0.186101	48.6511	8.03025	2.85597e-91	3.53196e-90
1	177181600	177182000	MergedBins_734	1	*	0.372202	0.087502	-2.0887	0.241421	0.26997
1	177194200	177194400	MergedBins_735	601	*	3.34982	52.5887	3.9726	5.88004e-54	3.87123e-53
1	177223600	177224200	MergedBins_736	82	*	2.97761	7.17517	1.26886	0.00130678	0.00183427
1	177225400	177225800	MergedBins_737	0	*	2.97761	0	-8.41062	1.19772e-08	2.37211e-08
1	177226400	177226600	MergedBins_738	213	*	1.48881	18.6379	3.64601	3.02423e-19	9.18166e-19
1	177246600	177246800	MergedBins_739	344	*	0.558303	30.1007	5.75261	8.10821e-53	5.20761e-52
1	178198400	178199200	MergedBins_740	207	*	4.28032	18.1129	2.08123	1.47411e-12	3.5181e-12
1	178201000	178201200	MergedBins_741	131	*	2.79151	11.4628	2.03784	3.11221e-08	6.04195e-08
1	178210400	178210600	MergedBins_742	0	*	2.41931	0	-8.11106	3.66154e-07	6.66814e-07
1	178215600	178215800	MergedBins_743	188	*	2.41931	16.4504	2.76545	1.59179e-14	4.12411e-14
1	178226800	178227000	MergedBins_744	0	*	1.11661	0	-6.99559	0.00107	0.00151206
1	178235600	178236000	MergedBins_745	689	*	3.16371	60.2889	4.2522	2.14097e-63	1.66715e-62
1	178555600	178556000	MergedBins_746	2	*	0.930504	0.175004	-2.41062	0.0379427	0.0464755
1	178606600	178606800	MergedBins_747	0	*	2.97761	0	-8.41062	1.19772e-08	2.37211e-08
1	178627400	178627600	MergedBins_748	619	*	0.558303	54.1638	6.60014	6.91087e-98	9.88981e-97
1	178723200	178723800	MergedBins_749	380	*	34.2426	33.2508	-0.0424022	0.77785	0.803394
1	178725000	178725200	MergedBins_750	0	*	2.23321	0	-7.99559	1.1449e-06	2.0145e-06
1	178726400	178726800	MergedBins_751	141	*	3.72202	12.3378	1.72893	1.63566e-07	3.03704e-07
1	178806600	178806800	MergedBins_752	741	*	0.372202	64.839	7.44463	5.05607e-120	1.09785e-118
1	178828000	178828800	MergedBins_753	0	*	1.11661	0	-6.99559	0.00107	0.00151206
1	179281200	179281600	MergedBins_754	326	*	8.56064	28.5257	1.73647	7.86584e-16	2.13956e-15
1	179308000	179308200	MergedBins_755	0	*	6.51353	0	-9.53991	4.69225e-18	1.38005e-17
1	179336000	179336600	MergedBins_756	27	*	1.30271	2.36256	0.858837	0.214785	0.241885
1	179364000	179364400	MergedBins_757	230	*	0.930504	20.1255	4.43487	8.38425e-32	3.53894e-31
1	179381600	179382000	MergedBins_758	416	*	5.58303	36.4009	2.70485	4.97894e-30	2.02512e-29
1	179391200	179391400	MergedBins_759	83	*	1.67491	7.26267	2.11642	8.44994e-06	1.40472e-05
1	180345600	180346000	MergedBins_760	32	*	8.18844	2.80007	-1.54813	2.35114e-06	4.07034e-06
1	180361600	180361800	MergedBins_761	1	*	0.558303	0.087502	-2.67366	0.0994594	0.117177
1	180691000	180691200	MergedBins_762	682	*	0	59.6764	11.6469	9.53629e-115	1.85007e-113
1	181832000	181832400	MergedBins_763	747	*	9.86334	65.364	2.72835	4.16974e-53	2.69494e-52
1	181836000	181836200	MergedBins_764	695	*	9.30504	60.8139	2.70832	3.10253e-49	1.84081e-48
1	181900000	181900200	MergedBins_765	32	*	4.65252	2.80007	-0.732552	0.0749488	0.0893702
1	181916200	181916400	MergedBins_766	0	*	0.930504	0	-6.73255	0.0033457	0.00451492
1	181917200	181917400	MergedBins_767	119	*	4.46642	10.4127	1.22116	0.000140622	0.000214129
1	181946800	181947200	MergedBins_768	12	*	8.18844	1.05002	-2.96316	2.26773e-13	5.60652e-13
1	181948200	181948800	MergedBins_769	242	*	3.34982	21.1755	2.66024	8.20134e-18	2.39218e-17
1	181953600	181954000	MergedBins_770	1	*	3.16371	0.087502	-5.17616	4.81227e-08	9.20314e-08
1	181981400	181981800	MergedBins_771	872	*	4.83862	76.3018	3.97905	1.20199e-77	1.172e-76
1	181983600	181984400	MergedBins_772	322	*	6.14133	28.1757	2.19783	8.42516e-20	2.61055e-19
1	182004400	182004800	MergedBins_773	12	*	5.02472	1.05002	-2.25862	1.46532e-06	2.56074e-06
1	182006000	182006200	MergedBins_774	494	*	5.39692	43.226	3.00169	3.66075e-38	1.77321e-37
1	182007600	182007800	MergedBins_775	552	*	0.558303	48.3011	6.43487	4.65356e-87	5.29671e-86
1	182009000	182009200	MergedBins_776	40	*	3.72202	3.50008	-0.0886959	0.931365	0.946113
1	182009600	182010000	MergedBins_777	547	*	2.41931	47.8636	4.30626	6.93747e-51	4.26639e-50
1	182010600	182010800	MergedBins_778	0	*	2.04711	0	-7.87006	3.57989e-06	6.07007e-06
1	182012000	182012400	MergedBins_779	121	*	3.53592	10.5877	1.58224	4.65371e-06	7.83553e-06
1	182975000	182975200	MergedBins_780	573	*	0.186101	50.1387	8.0737	3.38781e-94	4.46866e-93
1	183189200	183189400	MergedBins_781	715	*	0.186101	62.564	8.3931	7.41147e-118	1.54682e-116
1	183364800	183365000	MergedBins_782	2	*	1.48881	0.175004	-3.0887	0.00252775	0.00348017
1	186112400	186112600	MergedBins_783	0	*	1.67491	0	-7.58055	3.50006e-05	5.545e-05
1	186688200	186688400	MergedBins_784	99	*	1.30271	8.6627	2.73331	3.84404e-08	7.3865e-08
1	186702200	186702600	MergedBins_785	0	*	7.25793	0	-9.69603	4.90867e-20	1.53104e-19
1	187632400	187632600	MergedBins_786	16	*	1.48881	1.40003	-0.0886959	0.938763	0.951915
1	187632800	187633600	MergedBins_787	211	*	7.25793	18.4629	1.347	4.11988e-08	7.90308e-08
1	187644600	187644800	MergedBins_788	5	*	1.67491	0.43751	-1.93669	0.0175993	0.0223374
1	187645600	187646000	MergedBins_789	45	*	2.23321	3.93759	0.818195	0.103719	0.120694
1	187646200	187646600	MergedBins_790	9	*	1.67491	0.787518	-1.0887	0.165631	0.188579
1	187647000	187647400	MergedBins_791	31	*	21.4016	2.71256	-2.97999	2.41203e-33	1.05111e-32
1	187649200	187649600	MergedBins_792	292	*	5.39692	25.5506	2.24315	2.03796e-18	6.04906e-18
1	187652200	187652400	MergedBins_793	189	*	6.51353	16.5379	1.34426	2.2539e-07	4.16715e-07
1	187681600	187681800	MergedBins_794	1	*	2.04711	0.087502	-4.54813	3.03648e-05	4.86933e-05
1	187684200	187684400	MergedBins_795	4	*	2.97761	0.350008	-3.0887	1.39084e-05	2.271e-05
1	187687200	187687600	MergedBins_796	5	*	2.60541	0.43751	-2.57412	0.000233289	0.000351022
1	187707400	187707600	MergedBins_797	13	*	0.930504	1.13753	0.289816	0.8052	0.829518
1	187799400	187800000	MergedBins_798	183	*	5.95523	16.0129	1.427	1.1447e-07	2.15413e-07
1	187813800	187814000	MergedBins_799	0	*	2.41931	0	-8.11106	3.66154e-07	6.66814e-07
1	187814400	187814800	MergedBins_800	42	*	3.34982	3.67509	0.133697	0.848784	0.868711
1	187817800	187818000	MergedBins_801	49	*	1.48881	4.2876	1.52601	0.00572661	0.00761323
1	187820600	187820800	MergedBins_802	608	*	7.07183	53.2012	2.9113	1.20681e-45	6.72228e-45
1	187828600	187828800	MergedBins_803	153	*	0.744403	13.3878	4.16869	1.05603e-20	3.37685e-20
1	187830600	187830800	MergedBins_804	5	*	6.69963	0.43751	-3.93669	1.74669e-13	4.33352e-13
1	187843000	187843400	MergedBins_805	3	*	6.69963	0.262506	-4.67366	4.48445e-15	1.18525e-14
1	187844600	187845000	MergedBins_806	0	*	1.86101	0	-7.73255	1.11937e-05	1.83597e-05
1	187854800	187855400	MergedBins_807	0	*	8.18844	0	-9.87006	1.64225e-22	5.53678e-22
1	187855800	187856000	MergedBins_808	66	*	2.97761	5.77514	0.955698	0.0213039	0.0268792
1	187856400	187856800	MergedBins_809	503	*	2.04711	44.0135	4.42629	2.21308e-47	1.26906e-46
1	187857200	187857400	MergedBins_810	199	*	0.186101	17.4129	6.54793	4.85265e-32	2.06448e-31
1	187870800	187871000	MergedBins_811	289	*	6.51353	25.2881	1.95695	4.89263e-16	1.33792e-15
1	187871600	187872000	MergedBins_812	0	*	13.9576	0	-10.6394	7.36484e-38	3.54763e-37
1	187883000	187883200	MergedBins_813	850	*	0.558303	74.3767	7.05766	2.34603e-136	6.84472e-135
1	187892200	187892600	MergedBins_814	66	*	5.21082	5.77514	0.148343	0.729687	0.756765
1	187924400	187925200	MergedBins_815	1468	*	8.93284	128.453	3.84598	1.39373e-127	3.58464e-126
1	187935400	187935800	MergedBins_816	0	*	2.97761	0	-8.41062	1.19772e-08	2.37211e-08
1	187938200	187939000	MergedBins_817	229	*	3.72202	20.038	2.42858	9.37186e-16	2.54369e-15
1	187940200	187940600	MergedBins_818	82	*	0.744403	7.17517	3.26886	7.69376e-10	1.63198e-09
1	187945400	187945800	MergedBins_819	49	*	2.60541	4.2876	0.718659	0.127071	0.146569
1	187950000	187950400	MergedBins_820	78	*	6.32743	6.82516	0.109244	0.78927	0.814544
1	188082600	188082800	MergedBins_821	103	*	0.372202	9.01271	4.5978	7.00413e-15	1.84387e-14
1	188090200	188090600	MergedBins_822	0	*	4.46642	0	-8.99559	1.31077e-12	3.1349e-12
1	189744800	189745200	MergedBins_823	1291	*	0.558303	112.965	7.66061	1.31838e-209	1.05573e-207
1	189753600	189753800	MergedBins_824	0	*	6.51353	0	-9.53991	4.69225e-18	1.38005e-17
1	189813400	189813800	MergedBins_825	30	*	0.186101	2.62506	3.81819	0.000148375	0.00022566
1	189893000	189893400	MergedBins_826	0	*	45.4086	0	-12.3414	1.56089e-121	3.51075e-120
1	189901200	189901600	MergedBins_827	1	*	1.86101	0.087502	-4.41062	8.73316e-05	0.000135634
1	189915000	189915400	MergedBins_828	4	*	1.86101	0.350008	-2.41062	0.00286026	0.00391884
1	189915800	189916000	MergedBins_829	2	*	4.09422	0.175004	-4.54813	1.70465e-09	3.54461e-09
1	189916200	189916400	MergedBins_830	0	*	0.558303	0	-5.99559	0.0327109	0.0403208
1	189916800	189917000	MergedBins_831	106	*	1.11661	9.27522	3.05426	2.85138e-09	5.86856e-09
1	189919000	189919400	MergedBins_832	239	*	2.41931	20.913	3.11173	1.28216e-19	3.95435e-19
1	190120800	190121000	MergedBins_833	0	*	18.424	0	-11.04	9.6514e-50	5.77805e-49
1	190122600	190123000	MergedBins_834	9	*	8.93284	0.787518	-3.50373	9.36967e-17	2.63429e-16
1	190130400	190130800	MergedBins_835	27	*	2.41931	2.36256	-0.0342481	0.920995	0.936674
1	190137400	190137600	MergedBins_836	533	*	0.744403	46.6386	5.9693	2.96361e-82	3.10121e-81
1	190144200	190144600	MergedBins_837	88	*	20.4711	7.70018	-1.41062	1.9771e-12	4.6967e-12
1	190155000	190155200	MergedBins_838	179	*	8.00234	15.6629	0.968855	7.58674e-05	0.000118252
1	190159800	190160000	MergedBins_839	32	*	0.372202	2.80007	2.9113	0.000625798	0.000906116
1	190866800	190867000	MergedBins_840	82	*	0.744403	7.17517	3.26886	7.69376e-10	1.63198e-09
1	190962400	190962600	MergedBins_841	84	*	0.744403	7.35017	3.30362	3.07043e-10	6.64524e-10
1	190967600	190968000	MergedBins_842	6	*	2.97761	0.525012	-2.50373	0.000109251	0.000167597
1	190974200	190974600	MergedBins_843	3	*	0.558303	0.262506	-1.0887	0.39223	0.423877
1	192111800	192112200	MergedBins_844	248	*	6.32743	21.7005	1.77804	1.15973e-12	2.79379e-12
1	194771200	194771600	MergedBins_845	920	*	4.28032	80.5019	4.23323	5.59862e-84	6.06661e-83
1	194961000	194961200	MergedBins_846	285	*	20.8433	24.9381	0.258767	0.119545	0.138411
1	195104600	195105000	MergedBins_847	251	*	2.23321	21.963	3.29789	2.86147e-21	9.30555e-21
1	195105200	195105600	MergedBins_848	0	*	1.11661	0	-6.99559	0.00107	0.00151206
1	195106000	195106800	MergedBins_849	115	*	2.60541	10.0627	1.94944	4.39818e-07	7.9698e-07
10	3367800	3368200	MergedBins_850	12	*	10.4216	1.05002	-3.31109	1.69544e-18	5.04698e-18
10	3369000	3369600	MergedBins_851	495	*	8.74674	43.3135	2.308	4.66414e-31	1.93756e-30
10	3370000	3370600	MergedBins_852	35	*	5.58303	3.06257	-0.866303	0.0205102	0.0259155
10	3370800	3371200	MergedBins_853	272	*	8.18844	23.8006	1.53934	8.9731e-12	2.07656e-11
10	3372200	3372800	MergedBins_854	86	*	19.5406	7.52518	-1.37668	1.63397e-11	3.73615e-11
10	3373600	3373800	MergedBins_855	65	*	2.60541	5.68763	1.12632	0.00940755	0.0123112
10	3374000	3374800	MergedBins_856	294	*	14.702	25.7256	0.807196	9.98857e-06	1.65538e-05
10	3375400	3378800	MergedBins_857	2278	*	27.1707	199.33	2.87503	4.48597e-165	2.05065e-163
10	3379400	3380800	MergedBins_858	449	*	9.11894	39.2884	2.10717	5.2804e-26	1.96964e-25
10	3381200	3381800	MergedBins_859	81	*	3.90812	7.08767	0.858837	0.018229	0.0231236
10	3382000	3383600	MergedBins_860	726	*	10.2355	63.5265	2.63377	3.04806e-50	1.8503e-49
10	3383800	3384200	MergedBins_861	237	*	3.53592	20.738	2.55212	6.36782e-17	1.79793e-16
10	3385600	3386000	MergedBins_862	243	*	5.76913	21.263	1.88192	3.58644e-13	8.81082e-13
10	3387600	3388000	MergedBins_863	54	*	2.04711	4.72511	1.20676	0.0135107	0.017343
10	3389600	3390000	MergedBins_864	608	*	25.3097	53.2012	1.07177	1.53605e-15	4.12646e-15
10	3391200	3391600	MergedBins_865	354	*	17.6796	30.9757	0.809054	1.13483e-06	2.01437e-06
10	3393600	3394200	MergedBins_866	671	*	8.56064	58.7139	2.77791	1.60934e-48	9.43461e-48
10	3394800	3395000	MergedBins_867	2	*	1.11661	0.175004	-2.67366	0.0158326	0.0201745
10	3396400	3396800	MergedBins_868	431	*	4.09422	37.7134	3.20342	6.40846e-35	2.87363e-34
10	3397200	3397400	MergedBins_869	59	*	0.558303	5.16262	3.20898	3.32487e-07	6.09039e-07
10	3398000	3398400	MergedBins_870	48	*	5.58303	4.2001	-0.410624	0.268862	0.299292
10	3401000	3401400	MergedBins_871	258	*	11.7244	22.5755	0.945251	2.78114e-06	4.79564e-06
10	3402400	3402600	MergedBins_872	122	*	5.02472	10.6752	1.08715	0.00040053	0.000588379
10	3403200	3404000	MergedBins_873	463	*	4.65252	40.5134	3.12232	8.36064e-37	3.94319e-36
10	3404800	3405600	MergedBins_874	1002	*	0.372202	87.6771	7.87997	1.68182e-163	7.44683e-162
10	3406800	3407000	MergedBins_875	0	*	4.46642	0	-8.99559	1.31077e-12	3.1349e-12
10	3408200	3408400	MergedBins_876	5	*	5.76913	0.43751	-3.72096	2.65353e-11	6.003e-11
10	3409400	3409800	MergedBins_877	0	*	10.7938	0	-10.2686	1.92294e-29	7.70201e-29
10	3412600	3412800	MergedBins_878	0	*	1.30271	0	-7.21798	0.000342201	0.000504675
10	3419000	3419600	MergedBins_879	28	*	1.48881	2.45006	0.718659	0.281575	0.312674
10	3419800	3420000	MergedBins_880	0	*	1.67491	0	-7.58055	3.50006e-05	5.545e-05
10	3422800	3423400	MergedBins_881	141	*	3.34982	12.3378	1.88093	3.78203e-08	7.26982e-08
10	3426000	3426600	MergedBins_882	807	*	5.39692	70.6142	3.70975	1.23556e-69	1.07148e-68
10	3427000	3427400	MergedBins_883	151	*	6.88573	13.2128	0.940256	0.000403264	0.000592023
10	3428000	3428200	MergedBins_884	0	*	1.11661	0	-6.99559	0.00107	0.00151206
10	3430800	3431000	MergedBins_885	153	*	1.11661	13.3878	3.58373	4.65771e-14	1.18393e-13
10	3431800	3432400	MergedBins_886	426	*	3.72202	37.2759	3.32409	2.6118e-35	1.18243e-34
10	3432600	3434400	MergedBins_887	1034	*	15.2603	90.4771	2.56777	1.97159e-69	1.70193e-68
10	3435400	3436000	MergedBins_888	758	*	7.25793	66.3266	3.19196	3.77344e-60	2.7847e-59
10	3436400	3436800	MergedBins_889	282	*	3.16371	24.6756	2.96339	3.42209e-22	1.14553e-21
10	3437400	3437800	MergedBins_890	86	*	5.02472	7.52518	0.582681	0.0814282	0.0967897
10	3438400	3438800	MergedBins_891	69	*	2.23321	6.03764	1.43487	0.00140581	0.00196838
10	3439000	3440400	MergedBins_892	1319	*	22.5182	115.415	2.35767	8.54572e-82	8.88487e-81
10	3441000	3441600	MergedBins_893	532	*	2.04711	46.5511	4.50715	2.42167e-50	1.47243e-49
10	3450000	3450400	MergedBins_894	0	*	2.23321	0	-7.99559	1.1449e-06	2.0145e-06
10	3450600	3450800	MergedBins_895	47	*	3.34982	4.1126	0.295968	0.542893	0.57573
10	3452200	3452800	MergedBins_896	88	*	35.1731	7.70018	-2.19151	6.54395e-38	3.15895e-37
10	3455800	3456200	MergedBins_897	0	*	4.09422	0	-8.87006	1.28154e-11	2.93805e-11
10	3456800	3458800	MergedBins_898	1420	*	7.07183	124.253	4.13505	1.64292e-127	4.21596e-126
10	3469600	3469800	MergedBins_899	0	*	0	0	0	1	1
10	3753800	3754000	MergedBins_900	68	*	1.11661	5.95014	2.4138	1.88106e-05	3.04852e-05
10	3865400	3865600	MergedBins_901	550	*	0.930504	48.1261	5.69266	1.78341e-83	1.90506e-82
10	7173400	7174200	MergedBins_902	1649	*	16.7491	144.291	3.10683	1.09684e-126	2.746e-125
10	7181800	7182000	MergedBins_903	0	*	0.186101	0	-4.41062	0.319814	0.349765
10	7186600	7187000	MergedBins_904	211	*	18.0518	18.4629	0.0324905	0.9025	0.920019
10	7187400	7187800	MergedBins_905	705	*	2.04711	61.6889	4.91335	5.14571e-68	4.34557e-67
10	7906200	7906600	MergedBins_906	45	*	37.2202	3.93759	-3.2407	7.63363e-62	5.76916e-61
10	7917200	7918200	MergedBins_907	140	*	4.09422	12.2503	1.58116	7.91817e-07	1.41934e-06
10	8808200	8808400	MergedBins_908	39	*	1.67491	3.41258	1.02678	0.0701831	0.0838735
10	9494400	9494600	MergedBins_909	3	*	0.930504	0.262506	-1.82566	0.120609	0.139457
10	9561400	9561600	MergedBins_910	0	*	0.558303	0	-5.99559	0.0327109	0.0403208
10	9571600	9572000	MergedBins_911	97	*	1.86101	8.4877	2.18929	8.80673e-07	1.57436e-06
10	9600400	9600800	MergedBins_912	239	*	3.16371	20.913	2.72471	6.34143e-18	1.85687e-17
10	9601800	9602000	MergedBins_913	121	*	0.372202	10.5877	4.83017	5.96888e-18	1.74869e-17
10	11292800	11293200	MergedBins_914	12	*	0.930504	1.05002	0.174339	1	1
10	12546800	12547200	MergedBins_915	899	*	0.372202	78.6643	7.72348	2.53174e-146	8.53311e-145
10	12570800	12571200	MergedBins_916	223	*	1.11661	19.513	4.12724	3.20979e-21	1.04263e-20
10	12576600	12576800	MergedBins_917	104	*	1.11661	9.10021	3.02678	4.54768e-09	9.21204e-09
10	12589600	12590400	MergedBins_918	178	*	2.23321	15.5754	2.80208	6.02906e-14	1.52633e-13
10	12601600	12601800	MergedBins_919	3	*	4.28032	0.262506	-4.0273	3.55806e-09	7.28979e-09
10	12615600	12615800	MergedBins_920	0	*	3.16371	0	-8.49809	3.83046e-09	7.77174e-09
10	12618200	12618400	MergedBins_921	88	*	0.372202	7.70018	4.37074	1.61025e-12	3.83653e-12
10	12676400	12676600	MergedBins_922	681	*	1.11661	59.5889	5.73785	4.00507e-68	3.39499e-67
10	12707000	12707200	MergedBins_923	21	*	0.372202	1.83754	2.30362	0.0136454	0.017506
10	12711400	12711600	MergedBins_924	0	*	16.3769	0	-10.8701	2.69633e-44	1.46226e-43
10	12718200	12718600	MergedBins_925	140	*	1.11661	12.2503	3.45562	9.89168e-13	2.38749e-12
10	12720800	12721000	MergedBins_926	22	*	30.8927	1.92505	-4.0043	5.30081e-61	3.9532e-60
10	12726200	12726400	MergedBins_927	31	*	55.458	2.71256	-4.35367	2.31509e-114	4.43046e-113
10	12727600	12728000	MergedBins_928	13	*	49.6889	1.13753	-5.44895	8.19133e-114	1.55442e-112
10	12778000	12778400	MergedBins_929	8	*	5.02472	0.700016	-2.84358	2.90151e-08	5.64357e-08
10	12821800	12822400	MergedBins_930	51	*	7.81624	4.4626	-0.808588	0.00894908	0.0117289
10	12823200	12823600	MergedBins_931	52	*	2.04711	4.55011	1.15231	0.0194842	0.0246522
10	12856800	12857400	MergedBins_932	87	*	4.09422	7.61268	0.894816	0.0111408	0.014381
10	12857600	12857800	MergedBins_933	1	*	2.04711	0.087502	-4.54813	3.03648e-05	4.86933e-05
10	13097800	13098400	MergedBins_934	192	*	9.67724	16.8004	0.795827	0.000456785	0.000668424
10	13099400	13100000	MergedBins_935	17	*	4.83862	1.48753	-1.70167	0.000122432	0.00018706
10	13100200	13100800	MergedBins_936	31	*	6.14133	2.71256	-1.17889	0.00126127	0.00177215
10	13101800	13102200	MergedBins_937	23	*	3.16371	2.01255	-0.652597	0.20881	0.235414
10	13117800	13118600	MergedBins_938	1283	*	3.16371	112.265	5.14915	5.32413e-124	1.27092e-122
10	13129800	13131600	MergedBins_939	754	*	105.147	65.9765	-0.672382	3.67969e-17	1.0513e-16
10	13208200	13208800	MergedBins_940	187	*	9.49114	16.3629	0.785773	0.000623698	0.000903538
10	13213200	13213600	MergedBins_941	46	*	34.8009	4.02509	-3.11203	9.49095e-56	6.51047e-55
10	13258000	13258200	MergedBins_942	4	*	1.86101	0.350008	-2.41062	0.00286026	0.00391884
10	13280200	13281400	MergedBins_943	297	*	9.86334	25.9881	1.3977	2.1274e-11	4.83992e-11
10	13283400	13284000	MergedBins_944	731	*	9.67724	63.964	2.72459	6.02467e-52	3.79178e-51
10	13284800	13285200	MergedBins_945	48	*	9.49114	4.2001	-1.17616	4.91922e-05	7.7304e-05
10	13293400	13293800	MergedBins_946	0	*	1.30271	0	-7.21798	0.000342201	0.000504675
10	13303000	13303800	MergedBins_947	201	*	5.39692	17.5879	1.70437	4.70483e-10	1.00706e-09
10	13304200	13304600	MergedBins_948	1183	*	5.02472	103.515	4.36465	8.74936e-109	1.52688e-107
10	13307400	13307800	MergedBins_949	754	*	0.558303	65.9765	6.88476	2.36996e-120	5.19595e-119
10	13311200	13311600	MergedBins_950	269	*	2.41931	23.5381	3.28233	1.22679e-22	4.1649e-22
10	13313600	13313800	MergedBins_951	14	*	2.04711	1.22503	-0.740773	0.282811	0.31383
10	13314200	13314600	MergedBins_952	84	*	0.186101	7.35017	5.30362	3.0905e-13	7.61398e-13
10	13318200	13318400	MergedBins_953	199	*	1.86101	17.4129	3.226	6.49427e-17	1.83317e-16
10	13320000	13320400	MergedBins_954	87	*	9.11894	7.61268	-0.260462	0.35745	0.388298
10	13375200	13375600	MergedBins_955	15	*	20.6572	1.31253	-3.97622	5.32074e-41	2.71471e-40
10	13402200	13402600	MergedBins_956	43	*	5.76913	3.76259	-0.616627	0.0885185	0.104809
10	13405000	13405200	MergedBins_957	0	*	2.79151	0	-8.31751	3.74505e-08	7.20241e-08
10	13439400	13439800	MergedBins_958	87	*	1.11661	7.61268	2.76929	2.37195e-07	4.37896e-07
10	13465000	13465200	MergedBins_959	50	*	1.86101	4.3751	1.23323	0.0161702	0.0205767
10	13471800	13472200	MergedBins_960	376	*	2.23321	32.9008	3.88093	6.00318e-34	2.64463e-33
10	13509600	13510000	MergedBins_961	24	*	0.930504	2.10005	1.17434	0.110652	0.128523
10	13747800	13748000	MergedBins_962	13	*	0.372202	1.13753	1.61174	0.167398	0.190419
10	13751800	13752000	MergedBins_963	2	*	3.16371	0.175004	-4.17616	3.19266e-07	5.8539e-07
10	13799200	13799400	MergedBins_964	11	*	0.930504	0.962523	0.0488077	1	1
10	13825000	13825200	MergedBins_965	589	*	2.04711	51.5387	4.654	3.65403e-56	2.52495e-55
10	13996600	13997000	MergedBins_966	0	*	0.930504	0	-6.73255	0.0033457	0.00451492
10	14000000	14000200	MergedBins_967	140	*	1.67491	12.2503	2.87066	2.06404e-11	4.6967e-11
10	14083400	14083800	MergedBins_968	282	*	2.41931	24.6756	3.35042	5.98377e-24	2.10018e-23
10	14088600	14088800	MergedBins_969	33	*	6.51353	2.88757	-1.17358	0.000913918	0.00130969
10	17822400	17822800	MergedBins_970	1021	*	0.558303	89.3396	7.32211	1.36583e-164	6.19343e-163
10	17906200	17906600	MergedBins_971	20	*	1.11661	1.75004	0.64827	0.445314	0.478178
10	17913200	17913600	MergedBins_972	434	*	0.558303	37.9759	6.08789	1.3522e-67	1.13177e-66
10	18070600	18071000	MergedBins_973	14	*	2.04711	1.22503	-0.740773	0.282811	0.31383
10	18072000	18072200	MergedBins_974	1	*	0.372202	0.087502	-2.0887	0.241421	0.26997
10	18084400	18084600	MergedBins_975	1016	*	1.11661	88.9021	6.31503	2.11772e-102	3.29355e-101
10	18090400	18090600	MergedBins_976	0	*	1.11661	0	-6.99559	0.00107	0.00151206
10	18349200	18349400	MergedBins_977	22	*	4.46642	1.92505	-1.21423	0.0054647	0.00727446
10	18441600	18442000	MergedBins_978	0	*	0.744403	0	-6.41062	0.0104614	0.0135226
10	18442400	18442600	MergedBins_979	3	*	0.372202	0.262506	-0.503733	0.657723	0.68737
10	18502200	18502400	MergedBins_980	20	*	0.930504	1.75004	0.911304	0.283037	0.313926
10	18516800	18517000	MergedBins_981	24	*	1.67491	2.10005	0.326342	0.69407	0.723414
10	18517600	18518000	MergedBins_982	160	*	3.90812	14.0003	1.84091	6.67872e-09	1.3442e-08
10	18856400	18857000	MergedBins_983	205	*	53.2248	17.9379	-1.56909	1.77208e-35	8.06795e-35
10	19864200	19864800	MergedBins_984	141	*	3.34982	12.3378	1.88093	3.78203e-08	7.26982e-08
10	19865000	19865200	MergedBins_985	99	*	3.34982	8.6627	1.37074	0.000176862	0.000267938
10	19865800	19866200	MergedBins_986	31	*	5.02472	2.71256	-0.889387	0.0251962	0.0316416
10	20016600	20016800	MergedBins_987	44	*	0.558303	3.85009	2.78577	5.32676e-05	8.35339e-05
10	20045200	20045400	MergedBins_988	825	*	0.558303	72.1892	7.01459	3.92296e-132	1.08035e-130
10	20114200	20114800	MergedBins_989	68	*	1.86101	5.95014	1.67684	0.000453357	0.000663493
10	20115000	20115400	MergedBins_990	64	*	2.97761	5.60013	0.911304	0.0294186	0.0367561
10	24165600	24166200	MergedBins_991	2518	*	0.558303	220.33	8.6244	0	0
10	25195600	25195800	MergedBins_992	955	*	0.930504	83.5645	6.48873	6.03366e-150	2.19055e-148
10	25363600	25363800	MergedBins_993	79	*	1.48881	6.91266	2.21508	8.91546e-06	1.48101e-05
10	25365000	25365400	MergedBins_994	6	*	3.34982	0.525012	-2.67366	1.71009e-05	2.7801e-05
10	25370800	25371000	MergedBins_995	0	*	2.79151	0	-8.31751	3.74505e-08	7.20241e-08
10	25427000	25427200	MergedBins_996	260	*	4.28032	22.7505	2.41011	1.33935e-17	3.88655e-17
10	25491200	25491400	MergedBins_997	112	*	1.48881	9.80023	2.71866	4.98005e-09	1.00716e-08
10	26787400	26787600	MergedBins_998	0	*	0.744403	0	-6.41062	0.0104614	0.0135226
10	26866000	26866400	MergedBins_999	39	*	4.65252	3.41258	-0.44715	0.279883	0.31107
10	26897200	26897400	MergedBins_1000	602	*	1.86101	52.6762	4.823	5.39558e-58	3.86313e-57
10	27051200	27051400	MergedBins_1001	550	*	1.11661	48.1261	5.42963	1.03009e-54	6.92716e-54
10	27544400	27544800	MergedBins_1002	0	*	2.04711	0	-7.87006	3.57989e-06	6.07007e-06
10	27575600	27575800	MergedBins_1003	21	*	4.83862	1.83754	-1.39682	0.00106023	0.00151206
10	27585200	27585600	MergedBins_1004	0	*	12.0966	0	-10.433	6.58e-33	2.84545e-32
10	28077600	28078000	MergedBins_1005	75	*	1.86101	6.56265	1.81819	0.000104447	0.000161438
10	28078200	28078600	MergedBins_1006	5	*	1.86101	0.43751	-2.0887	0.00920908	0.0120612
10	28100200	28100600	MergedBins_1007	660	*	2.41931	57.7514	4.57719	2.0523e-62	1.56571e-61
10	28106200	28106600	MergedBins_1008	0	*	16.9352	0	-10.9184	8.81965e-46	4.92009e-45
10	28108400	28110000	MergedBins_1009	658	*	9.67724	57.5763	2.57281	8.04256e-45	4.41461e-44
10	28110400	28110600	MergedBins_1010	11	*	0.930504	0.962523	0.0488077	1	1
10	28117600	28118000	MergedBins_1011	40	*	26.6124	3.50008	-2.92664	2.04053e-40	1.03086e-39
10	28118400	28118800	MergedBins_1012	31	*	6.88573	2.71256	-1.34395	0.000125166	0.000191161
10	28129600	28130000	MergedBins_1013	31	*	3.53592	2.71256	-0.382427	0.44674	0.479664
10	28131800	28132000	MergedBins_1014	20	*	1.48881	1.75004	0.233232	0.853796	0.873523
10	28136200	28136800	MergedBins_1015	492	*	11.1661	43.051	1.94693	3.33596e-26	1.25013e-25
10	28149400	28149600	MergedBins_1016	5	*	1.67491	0.43751	-1.93669	0.0175993	0.0223374
10	28150000	28150400	MergedBins_1017	0	*	1.11661	0	-6.99559	0.00107	0.00151206
10	28159200	28159400	MergedBins_1018	50	*	0.930504	4.3751	2.23323	0.00011758	0.000179769
10	28160400	28160800	MergedBins_1019	267	*	1.30271	23.363	4.16465	3.08983e-25	1.12685e-24
10	28175600	28175800	MergedBins_1020	0	*	2.97761	0	-8.41062	1.19772e-08	2.37211e-08
10	28215200	28215400	MergedBins_1021	0	*	4.09422	0	-8.87006	1.28154e-11	2.93805e-11
10	28235400	28235600	MergedBins_1022	551	*	1.86101	48.2136	4.69528	8.79194e-53	5.64354e-52
10	28294800	28295200	MergedBins_1023	27	*	2.23321	2.36256	0.0812291	0.992535	0.998371
10	28314000	28314200	MergedBins_1024	0	*	1.86101	0	-7.73255	1.11937e-05	1.83597e-05
10	28327200	28327400	MergedBins_1025	219	*	1.11661	19.1629	4.10113	8.24312e-21	2.64713e-20
10	28389200	28390000	MergedBins_1026	138	*	6.69963	12.0753	0.849904	0.0018564	0.00258136
10	28393200	28393400	MergedBins_1027	8	*	1.48881	0.700016	-1.0887	0.201492	0.227414
10	28422000	28422400	MergedBins_1028	103	*	0.558303	9.01271	4.01284	7.58359e-14	1.91558e-13
10	29099400	29099800	MergedBins_1029	720	*	0	63.0015	11.7251	5.36522e-121	1.19485e-119
10	30189200	30189600	MergedBins_1030	694	*	0	60.7264	11.672	9.22717e-117	1.87045e-115
10	30584200	30584400	MergedBins_1031	820	*	0.558303	71.7517	7.00582	3.21886e-131	8.77877e-130
10	30612800	30613000	MergedBins_1032	1090	*	0.372202	95.3772	8.00142	3.10548e-178	1.64619e-176
10	31581400	31581800	MergedBins_1033	156	*	0.930504	13.6503	3.87478	4.14393e-20	1.29898e-19
10	31585200	31585400	MergedBins_1034	1	*	0.930504	0.087502	-3.41062	0.0147242	0.0188088
10	33068800	33069200	MergedBins_1035	11	*	1.11661	0.962523	-0.214227	0.973799	0.982588
10	33086000	33086400	MergedBins_1036	1653	*	1.48881	144.641	6.60218	1.74611e-166	8.21474e-165
10	33092400	33092800	MergedBins_1037	258	*	3.53592	22.5755	2.6746	5.56736e-19	1.68033e-18
10	33093200	33093600	MergedBins_1038	71	*	1.11661	6.21265	2.47609	9.47529e-06	1.57101e-05
10	33098400	33098600	MergedBins_1039	1	*	1.30271	0.087502	-3.89605	0.00197153	0.00273504
10	33121000	33121200	MergedBins_1040	22	*	1.11661	1.92505	0.785773	0.319903	0.349765
10	33123400	33123800	MergedBins_1041	0	*	0.372202	0	-5.41062	0.102281	0.119131
10	33157000	33157200	MergedBins_1042	14	*	117.244	1.22503	-6.58055	1.91283e-280	2.95861e-278
10	33159000	33159400	MergedBins_1043	351	*	1.11661	30.7132	4.78167	2.4767e-34	1.0975e-33
10	33207600	33208000	MergedBins_1044	26	*	5.76913	2.27505	-1.34245	0.000492673	0.000719355
10	33243800	33244000	MergedBins_1045	540	*	6.69963	47.2511	2.81819	9.21575e-40	4.5981e-39
10	33247000	33247200	MergedBins_1046	1	*	0.372202	0.087502	-2.0887	0.241421	0.26997
10	33400600	33400800	MergedBins_1047	2	*	0.186101	0.175004	-0.0886959	1	1
10	33402000	33402200	MergedBins_1048	75	*	1.11661	6.56265	2.55516	3.78534e-06	6.40209e-06
10	34014400	34014600	MergedBins_1049	547	*	0.186101	47.8636	8.0067	6.03209e-90	7.29211e-89
10	37135000	37135400	MergedBins_1050	37	*	17.3074	3.23758	-2.4184	1.0072e-21	3.33011e-21
10	39028600	39028800	MergedBins_1051	0	*	7.63013	0	-9.76818	5.02058e-21	1.62149e-20
10	39030400	39030600	MergedBins_1052	121	*	19.5406	10.5877	-0.884078	4.31578e-06	7.28067e-06
10	39033000	39033200	MergedBins_1053	81	*	18.0518	7.08767	-1.34876	2.02281e-10	4.40747e-10
10	39089600	39090000	MergedBins_1054	39	*	2.97761	3.41258	0.196706	0.752716	0.779003
10	39102600	39102800	MergedBins_1055	19	*	0.744403	1.66254	1.15923	0.179535	0.203834
10	39430000	39430200	MergedBins_1056	639	*	0.186101	55.9138	8.23098	4.12821e-105	6.73578e-104
10	39437000	39437200	MergedBins_1057	682	*	1.30271	59.6764	5.51758	1.04271e-67	8.75338e-67
10	39465200	39465600	MergedBins_1058	294	*	7.63013	25.7256	1.75342	1.4823e-14	3.84487e-14
10	39497600	39498200	MergedBins_1059	1624	*	2.04711	142.103	6.11721	6.04755e-162	2.59631e-160
10	39664800	39665200	MergedBins_1060	0	*	2.23321	0	-7.99559	1.1449e-06	2.0145e-06
10	39665800	39666000	MergedBins_1061	750	*	0.744403	65.6265	6.46205	7.73984e-118	1.6094e-116
10	39678200	39678600	MergedBins_1062	20	*	2.41931	1.75004	-0.467207	0.467616	0.500602
10	39759800	39760000	MergedBins_1063	0	*	1.67491	0	-7.58055	3.50006e-05	5.545e-05
10	39763400	39763600	MergedBins_1064	26	*	1.30271	2.27505	0.804389	0.254368	0.283409
10	39791600	39792000	MergedBins_1065	92	*	4.09422	8.05019	0.975434	0.0050618	0.00676525
10	39845400	39845800	MergedBins_1066	65	*	2.97761	5.68763	0.933672	0.0250562	0.0314693
10	40097200	40097800	MergedBins_1067	122	*	3.53592	10.6752	1.59411	3.81344e-06	6.4467e-06
10	40137600	40137800	MergedBins_1068	647	*	0.744403	56.6138	6.24893	4.99813e-101	7.53457e-100
10	40660600	40660800	MergedBins_1069	671	*	2.04711	58.7139	4.84204	1.53302e-64	1.2096e-63
10	40676400	40676800	MergedBins_1070	5	*	1.48881	0.43751	-1.76677	0.033681	0.0414623
10	41231400	41231600	MergedBins_1071	19	*	0.372202	1.66254	2.15923	0.0325722	0.0403208
10	41235600	41235800	MergedBins_1072	44	*	1.11661	3.85009	1.78577	0.00400536	0.00538644
10	41246800	41247000	MergedBins_1073	18	*	0.744403	1.57504	1.08123	0.251587	0.280644
10	41287400	41287600	MergedBins_1074	18	*	0.558303	1.57504	1.49627	0.101589	0.119131
10	41523000	41523400	MergedBins_1075	174	*	10.6077	15.2254	0.521358	0.0208711	0.0263626
10	41524000	41524200	MergedBins_1076	188	*	10.0494	16.4504	0.711005	0.00160202	0.00223507
10	41526800	41527000	MergedBins_1077	193	*	6.14133	16.8879	1.45937	3.19161e-08	6.19076e-08
10	41528600	41529800	MergedBins_1078	1215	*	48.014	106.315	1.14682	1.56721e-32	6.73596e-32
10	41530600	41531000	MergedBins_1079	159	*	17.4935	13.9128	-0.330402	0.0897541	0.106183
10	41816400	41816600	MergedBins_1080	0	*	1.67491	0	-7.58055	3.50006e-05	5.545e-05
10	42229800	42230000	MergedBins_1081	0	*	0.186101	0	-4.41062	0.319814	0.349765
10	42240000	42240200	MergedBins_1082	0	*	5.02472	0	-9.16551	4.2876e-14	1.09207e-13
10	42771800	42772200	MergedBins_1083	1670	*	0.744403	146.128	7.61694	1.29489e-270	1.76151e-268
10	43052000	43052200	MergedBins_1084	0	*	1.30271	0	-7.21798	0.000342201	0.000504675
10	43138600	43139000	MergedBins_1085	617	*	0.558303	53.9888	6.59547	1.02902e-97	1.467e-96
10	43330000	43330200	MergedBins_1086	0	*	6.51353	0	-9.53991	4.69225e-18	1.38005e-17
10	45238600	45238800	MergedBins_1087	0	*	0.930504	0	-6.73255	0.0033457	0.00451492
10	45283600	45284200	MergedBins_1088	868	*	3.72202	75.9518	4.35093	3.72415e-80	3.73109e-79
10	45286000	45286600	MergedBins_1089	132	*	5.58303	11.5503	1.04881	0.000331009	0.000493976
10	45295000	45295400	MergedBins_1090	133	*	3.16371	11.6378	1.87912	9.5792e-08	1.81231e-07
10	45296600	45296800	MergedBins_1091	0	*	0.930504	0	-6.73255	0.0033457	0.00451492
10	45297400	45297800	MergedBins_1092	8	*	2.79151	0.700016	-1.99559	0.00140326	0.0019653
10	45346200	45346400	MergedBins_1093	2	*	10.6077	0.175004	-5.92159	4.8375e-26	1.80622e-25
10	45347800	45348000	MergedBins_1094	43	*	10.7938	3.76259	-1.52041	7.61678e-08	1.44929e-07
10	45349800	45350200	MergedBins_1095	263	*	8.00234	23.013	1.52396	2.67872e-11	6.05636e-11
10	45350600	45350800	MergedBins_1096	10	*	2.23321	0.87502	-1.35173	0.0412899	0.0502809
10	45351200	45352200	MergedBins_1097	578	*	10.4216	50.5762	2.27887	1.31869e-35	6.02675e-35
10	45352400	45353200	MergedBins_1098	1061	*	6.69963	92.8397	3.79259	4.74141e-92	6.00171e-91
10	45357400	45357600	MergedBins_1099	50	*	6.14133	4.3751	-0.489234	0.161046	0.183729
10	45358000	45358200	MergedBins_1100	128	*	2.41931	11.2003	2.21086	1.16562e-08	2.32321e-08
10	45359200	45360000	MergedBins_1101	239	*	5.58303	20.913	1.90528	3.89218e-13	9.54739e-13
10	45360600	45361600	MergedBins_1102	294	*	9.67724	25.7256	1.41054	2.0361e-11	4.63874e-11
10	45362200	45363200	MergedBins_1103	545	*	2.60541	47.6886	4.19406	3.42215e-50	2.07516e-49
10	45364400	45364800	MergedBins_1104	291	*	5.21082	25.4631	2.28882	1.08648e-18	3.25569e-18
10	45369200	45369600	MergedBins_1105	50	*	30.1483	4.3751	-2.78469	2.62834e-43	1.39786e-42
10	45370800	45371400	MergedBins_1106	577	*	26.4263	50.4887	0.933985	2.70302e-12	6.39695e-12
10	45613800	45614000	MergedBins_1107	455	*	2.04711	39.8134	4.2816	1.75393e-42	9.19388e-42
10	50771800	50772000	MergedBins_1108	5	*	0.930504	0.43751	-1.0887	0.307161	0.339317
10	51492000	51492400	MergedBins_1109	662	*	1.11661	57.9264	5.69703	3.52642e-66	2.87278e-65
10	52237200	52237600	MergedBins_1110	727	*	0.558303	63.614	6.83215	6.48263e-116	1.29549e-114
10	52376200	52376600	MergedBins_1111	797	*	2.04711	69.7391	5.09031	2.0407e-77	1.98463e-76
10	53303200	53303400	MergedBins_1112	32	*	3.16371	2.80007	-0.176159	0.799532	0.824355
10	53308800	53309000	MergedBins_1113	18	*	0.744403	1.57504	1.08123	0.251587	0.280644
10	53337600	53337800	MergedBins_1114	80	*	13.7715	7.00016	-0.976221	2.79521e-05	4.49326e-05
10	53343600	53344600	MergedBins_1115	916	*	74.6264	80.1519	0.10305	0.244569	0.273435
10	53344800	53345200	MergedBins_1116	110	*	55.8303	9.62523	-2.53615	4.19467e-71	3.7205e-70
10	53348000	53348400	MergedBins_1117	6	*	6.51353	0.525012	-3.63302	7.97554e-13	1.9312e-12
10	53353400	53353800	MergedBins_1118	0	*	38.5229	0	-12.1041	3.25552e-103	5.14098e-102
10	53366400	53366600	MergedBins_1119	3	*	3.53592	0.262506	-3.75166	2.0387e-07	3.7736e-07
10	53373000	53373400	MergedBins_1120	265	*	2.23321	23.188	3.37619	1.10245e-22	3.74709e-22
10	53374200	53374400	MergedBins_1121	551	*	9.30504	48.2136	2.37336	2.82484e-35	1.27734e-34
10	53375400	53375800	MergedBins_1122	5	*	14.702	0.43751	-5.07055	3.56715e-33	1.5503e-32
10	53566200	53566800	MergedBins_1123	45	*	0.930504	3.93759	2.08123	0.000398806	0.000585936
10	53567400	53567600	MergedBins_1124	0	*	0.930504	0	-6.73255	0.0033457	0.00451492
10	53568400	53568800	MergedBins_1125	360	*	5.95523	31.5007	2.40316	8.57088e-24	2.99981e-23
10	53960000	53960200	MergedBins_1126	0	*	1.11661	0	-6.99559	0.00107	0.00151206
10	56386800	56387000	MergedBins_1127	166	*	6.14133	14.5253	1.24195	4.61835e-06	7.77831e-06
10	58261600	58262000	MergedBins_1128	67	*	0.558303	5.86264	3.39243	1.94481e-08	3.80306e-08
10	58329000	58329200	MergedBins_1129	14	*	8.00234	1.22503	-2.70761	5.47932e-12	1.27824e-11
10	58331200	58331600	MergedBins_1130	1246	*	3.90812	109.028	4.80208	3.40175e-118	7.17928e-117
10	58332000	58332200	MergedBins_1131	0	*	9.49114	0	-10.083	5.61959e-26	2.09064e-25
10	58335600	58335800	MergedBins_1132	544	*	0.930504	47.6011	5.67684	2.42184e-82	2.53664e-81
10	58458200	58458600	MergedBins_1133	0	*	2.60541	0	-8.21798	1.17101e-07	2.19159e-07
10	59212600	59212800	MergedBins_1134	569	*	1.11661	49.7887	5.47863	1.16838e-56	8.13826e-56
10	59218600	59219000	MergedBins_1135	0	*	11.7244	0	-10.3879	6.43336e-32	2.72057e-31
10	59363600	59364000	MergedBins_1136	25	*	0.372202	2.18755	2.55516	0.00592708	0.00787325
10	59530000	59530200	MergedBins_1137	668	*	2.60541	58.4514	4.48765	9.84565e-63	7.54187e-62
10	59577400	59577600	MergedBins_1138	101	*	14.1437	8.83771	-0.678412	0.00232872	0.00321123
10	59593600	59593800	MergedBins_1139	68	*	7.07183	5.95014	-0.249161	0.453471	0.486474
10	59606600	59606800	MergedBins_1140	162	*	1.67491	14.1753	3.08123	1.2714e-13	3.18796e-13
10	60016800	60017000	MergedBins_1141	0	*	1.67491	0	-7.58055	3.50006e-05	5.545e-05
10	60770000	60770400	MergedBins_1142	17	*	3.16371	1.48753	-1.0887	0.0385629	0.0472044
10	61432800	61433600	MergedBins_1143	287	*	2.79151	25.1131	3.16932	1.46415e-23	5.10237e-23
10	62282600	62283000	MergedBins_1144	22	*	5.76913	1.92505	-1.58346	6.5915e-05	0.000102924
10	62331600	62331800	MergedBins_1145	0	*	0.372202	0	-5.41062	0.102281	0.119131
10	62622200	62622600	MergedBins_1146	17	*	1.67491	1.48753	-0.171158	0.938051	0.95162
10	62806200	62806400	MergedBins_1147	0	*	6.69963	0	-9.58055	1.50064e-18	4.47419e-18
10	63467400	63468000	MergedBins_1148	199	*	2.41931	17.4129	2.84749	1.28452e-15	3.47389e-15
10	63490600	63490800	MergedBins_1149	317	*	0.372202	27.7381	6.21964	8.03244e-50	4.8293e-49
10	63491600	63491800	MergedBins_1150	43	*	1.11661	3.76259	1.75261	0.0049696	0.00664359
10	63505000	63505200	MergedBins_1151	0	*	3.53592	0	-8.65855	3.91782e-10	8.4051e-10
10	63507000	63507400	MergedBins_1152	144	*	6.88573	12.6003	0.871776	0.00115842	0.00163272
10	63527000	63527200	MergedBins_1153	587	*	0.186101	51.3637	8.10852	2.221e-96	3.06943e-95
10	63527600	63527800	MergedBins_1154	0	*	0.372202	0	-5.41062	0.102281	0.119131
10	63538400	63538600	MergedBins_1155	125	*	5.02472	10.9378	1.1222	0.000241147	0.000362604
10	63541000	63541400	MergedBins_1156	27	*	0.186101	2.36256	3.66619	0.000397515	0.000584344
10	63542200	63542600	MergedBins_1157	30	*	3.34982	2.62506	-0.35173	0.506034	0.539276
10	63585000	63585200	MergedBins_1158	10	*	1.86101	0.87502	-1.0887	0.136749	0.157042
10	63585800	63586400	MergedBins_1159	238	*	10.9799	20.8255	0.923479	1.01132e-05	1.67578e-05
10	63590600	63591200	MergedBins_1160	914	*	15.2603	79.9769	2.3898	7.15962e-58	5.11641e-57
10	63591600	63592000	MergedBins_1161	1700	*	3.53592	148.753	5.3947	1.46921e-165	6.77095e-164
10	63595600	63596000	MergedBins_1162	19	*	7.44403	1.66254	-2.1627	8.47152e-09	1.69686e-08
10	63598000	63598400	MergedBins_1163	851	*	10.9799	74.4642	2.76168	7.53443e-61	5.60786e-60
10	63601800	63602800	MergedBins_1164	600	*	5.58303	52.5012	3.23323	2.57621e-48	1.50403e-47
10	63604800	63605200	MergedBins_1165	109	*	6.51353	9.53772	0.550205	0.0593526	0.0713685
10	63608400	63608800	MergedBins_1166	185	*	3.16371	16.1879	2.35522	1.19702e-12	2.88117e-12
10	63609200	63610000	MergedBins_1167	278	*	20.8433	24.3256	0.22289	0.184331	0.209005
10	63610400	63610800	MergedBins_1168	165	*	5.39692	14.4378	1.41965	5.45239e-07	9.84691e-07
10	63613000	63613600	MergedBins_1169	275	*	8.18844	24.0631	1.55516	5.01667e-12	1.17128e-11
10	63614200	63615000	MergedBins_1170	34	*	22.8904	2.97507	-2.94375	3.80727e-35	1.7154e-34
10	63618200	63619200	MergedBins_1171	376	*	10.7938	32.9008	1.60791	1.40431e-16	3.93256e-16
10	63620200	63620600	MergedBins_1172	110	*	1.67491	9.62523	2.52274	1.98904e-08	3.88686e-08
10	63621200	63622000	MergedBins_1173	154	*	18.9823	13.4753	-0.494335	0.00853359	0.0111973
10	63622400	63623400	MergedBins_1174	77	*	10.4216	6.73766	-0.629264	0.015938	0.0203019
10	63623600	63624600	MergedBins_1175	417	*	5.58303	36.4884	2.70832	3.97147e-30	1.61709e-29
10	63626000	63626200	MergedBins_1176	0	*	7.07183	0	-9.65855	1.53486e-19	4.69523e-19
10	63627600	63628200	MergedBins_1177	11	*	6.14133	0.962523	-2.67366	2.57633e-09	5.31312e-09
10	63629800	63630400	MergedBins_1178	427	*	19.7267	37.3634	0.921476	2.84814e-09	5.8651e-09
10	63630800	63631400	MergedBins_1179	525	*	37.0341	45.9386	0.310853	0.0106634	0.0137773
10	63632600	63633400	MergedBins_1180	1616	*	6.69963	141.403	4.39959	2.0149e-148	7.15418e-147
10	63634400	63635200	MergedBins_1181	206	*	11.7244	18.0254	0.620525	0.0032267	0.00440433
10	63635400	63635800	MergedBins_1182	93	*	2.23321	8.13769	1.8655	1.02955e-05	1.70574e-05
10	63636000	63638200	MergedBins_1183	1436	*	16.0047	125.653	2.97288	2.99125e-107	5.08648e-106
10	63639000	63639400	MergedBins_1184	167	*	1.67491	14.6128	3.12508	3.98281e-14	1.01973e-13
10	63639600	63640600	MergedBins_1185	713	*	9.86334	62.389	2.66114	8.86461e-50	5.32112e-49
10	63641000	63641400	MergedBins_1186	408	*	2.60541	35.7008	3.77637	2.97653e-36	1.38418e-35
10	63641800	63642200	MergedBins_1187	114	*	1.30271	9.97523	2.93684	1.19528e-09	2.52072e-09
10	63644400	63644800	MergedBins_1188	33	*	6.88573	2.88757	-1.25376	0.000298415	0.000446042
10	63646600	63648400	MergedBins_1189	1802	*	23.8209	157.679	2.72669	9.18696e-126	2.24524e-124
10	63649000	63650400	MergedBins_1190	1171	*	19.5406	102.465	2.39058	1.02489e-73	9.46197e-73
10	63652600	63653600	MergedBins_1191	945	*	18.6101	82.6894	2.15162	3.41094e-54	2.26546e-53
10	63655200	63655400	MergedBins_1192	0	*	8.56064	0	-9.93419	1.67969e-23	5.83372e-23
10	63671200	63672000	MergedBins_1193	283	*	16.9352	24.7631	0.548168	0.0018298	0.00254781
10	63672400	63673400	MergedBins_1194	855	*	21.9599	74.8143	1.76844	4.86977e-40	2.44268e-39
10	63674200	63674600	MergedBins_1195	70	*	5.02472	6.12514	0.2857	0.443247	0.476276
10	63674800	63676200	MergedBins_1196	394	*	10.6077	34.4758	1.70047	2.00527e-18	5.95828e-18
10	63679600	63679800	MergedBins_1197	0	*	3.53592	0	-8.65855	3.91782e-10	8.4051e-10
10	63682200	63682400	MergedBins_1198	4	*	0.186101	0.350008	0.911304	1	1
10	63686400	63686600	MergedBins_1199	50	*	4.28032	4.3751	0.0315984	0.969258	0.979266
10	63691200	63691400	MergedBins_1200	0	*	3.34982	0	-8.58055	1.22503e-09	2.56573e-09
10	63692200	63692400	MergedBins_1201	205	*	3.72202	17.9379	2.26886	1.90428e-13	4.71932e-13
10	63693600	63694200	MergedBins_1202	83	*	1.48881	7.26267	2.28634	3.64368e-06	6.16712e-06
10	63694400	63694800	MergedBins_1203	209	*	7.63013	18.2879	1.26111	1.84386e-07	3.41799e-07
10	63695800	63696200	MergedBins_1204	299	*	6.32743	26.1631	2.04784	2.68714e-17	7.7026e-17
10	63698400	63699000	MergedBins_1205	31	*	2.41931	2.71256	0.165061	0.853363	0.873319
10	63699600	63700400	MergedBins_1206	226	*	6.88573	19.7755	1.52203	7.16354e-10	1.52094e-09
10	63700600	63701600	MergedBins_1207	620	*	7.63013	54.2513	2.82988	1.43049e-45	7.96041e-45
10	63703600	63703800	MergedBins_1208	0	*	18.9823	0	-11.083	3.15694e-51	1.95959e-50
10	63706600	63707000	MergedBins_1209	94	*	2.23321	8.22519	1.88093	8.32624e-06	1.38497e-05
10	63707400	63707600	MergedBins_1210	18	*	7.25793	1.57504	-2.20417	8.58166e-09	1.71801e-08
10	63710000	63711000	MergedBins_1211	990	*	14.702	86.627	2.55881	2.36932e-66	1.93855e-65
10	63711400	63712600	MergedBins_1212	474	*	12.841	41.476	1.69152	9.34648e-22	3.09203e-21
10	63712800	63713200	MergedBins_1213	0	*	6.14133	0	-9.45502	4.58765e-17	1.30083e-16
10	63715000	63715600	MergedBins_1214	2	*	7.63013	0.175004	-5.44625	2.14496e-18	6.36332e-18
10	63716600	63717000	MergedBins_1215	147	*	5.58303	12.8628	1.20409	2.58351e-05	4.15948e-05
10	63717600	63718000	MergedBins_1216	10	*	1.48881	0.87502	-0.766768	0.378308	0.409933
10	63853600	63854000	MergedBins_1217	971	*	10.2355	84.9645	3.05327	2.09067e-74	1.94767e-73
10	63856000	63856600	MergedBins_1218	1	*	14.5159	0.087502	-7.3741	1.3022e-37	6.24337e-37
10	63858200	63858400	MergedBins_1219	248	*	6.51353	21.7005	1.73622	2.36926e-12	5.61649e-12
10	63862800	63863600	MergedBins_1220	408	*	30.1483	35.7008	0.243879	0.0754648	0.0899665
10	63863800	63864200	MergedBins_1221	12	*	6.14133	1.05002	-2.54813	7.13283e-09	1.43406e-08
10	63864400	63865200	MergedBins_1222	431	*	8.37454	37.7134	2.171	9.70857e-26	3.59644e-25
10	63865800	63866000	MergedBins_1223	7	*	2.04711	0.612514	-1.74077	0.0165254	0.0210074
10	63866200	63867200	MergedBins_1224	632	*	8.56064	55.3013	2.69152	1.08145e-44	5.91885e-44
10	63867400	63867800	MergedBins_1225	618	*	4.09422	54.0763	3.72334	8.75456e-54	5.72366e-53
10	63869600	63870000	MergedBins_1226	7	*	5.02472	0.612514	-3.03623	9.14541e-09	1.82924e-08
10	63872000	63872400	MergedBins_1227	145	*	7.44403	12.6878	0.769285	0.0032572	0.00444329
10	63875000	63875200	MergedBins_1228	683	*	10.6077	59.7639	2.49416	2.80337e-45	1.55237e-44
10	63875600	63876400	MergedBins_1229	1083	*	38.3368	94.7647	1.30562	1.06338e-34	4.74197e-34
10	63877600	63878600	MergedBins_1230	1636	*	19.9128	143.153	2.84579	3.84959e-118	8.10927e-117
10	63879000	63879800	MergedBins_1231	253	*	10.7938	22.138	1.03632	6.35284e-07	1.14256e-06
10	63880600	63881600	MergedBins_1232	347	*	5.58303	30.3632	2.44321	2.62354e-23	9.05883e-23
10	63881800	63882200	MergedBins_1233	53	*	12.0966	4.63761	-1.38314	1.27636e-07	2.38165e-07
10	63883200	63884400	MergedBins_1234	2334	*	35.9175	204.23	2.50744	1.63081e-151	6.07706e-150
10	63885000	63885600	MergedBins_1235	724	*	18.2379	63.3515	1.79644	9.80093e-35	4.37401e-34
10	63886800	63889400	MergedBins_1236	2337	*	26.0541	204.492	2.97246	1.90589e-173	9.6934e-172
10	63890000	63891200	MergedBins_1237	772	*	7.25793	67.5516	3.21836	1.49915e-61	1.12771e-60
10	63891600	63893000	MergedBins_1238	912	*	6.69963	79.8019	3.57427	5.48721e-77	5.31812e-76
10	63893800	63894200	MergedBins_1239	52	*	13.3993	4.55011	-1.55818	8.72385e-10	1.84701e-09
10	63895600	63896000	MergedBins_1240	0	*	52.4804	0	-12.5502	2.39293e-140	7.42268e-139
10	63898600	63899200	MergedBins_1241	62	*	1.67491	5.42513	1.69558	0.000777955	0.00111968
10	63902000	63903200	MergedBins_1242	307	*	34.8009	26.8631	-0.373495	0.00595111	0.00790332
10	63904200	63904400	MergedBins_1243	43	*	5.58303	3.76259	-0.569322	0.122539	0.141544
10	63906200	63907000	MergedBins_1244	317	*	33.6843	27.7381	-0.280203	0.0413493	0.0503424
10	63907400	63907800	MergedBins_1245	13	*	29.0317	1.13753	-4.67366	7.62988e-63	5.87246e-62
10	63925400	63926000	MergedBins_1246	226	*	36.848	19.7755	-0.897874	1.1538e-10	2.54493e-10
10	63931200	63931400	MergedBins_1247	13	*	4.65252	1.13753	-2.03211	1.75109e-05	2.84189e-05
10	63932000	63932400	MergedBins_1248	27	*	9.86334	2.36256	-2.06173	1.10476e-10	2.4382e-10
10	63934000	63934400	MergedBins_1249	0	*	3.53592	0	-8.65855	3.91782e-10	8.4051e-10
10	63935000	63936200	MergedBins_1250	1741	*	20.0989	152.341	2.92212	4.41124e-128	1.14499e-126
10	63939400	63939600	MergedBins_1251	131	*	6.14133	11.4628	0.900333	0.0015108	0.00211172
10	63941800	63943200	MergedBins_1252	1124	*	21.9599	98.3523	2.16309	1.71448e-64	1.35183e-63
10	63943600	63944000	MergedBins_1253	154	*	3.34982	13.4753	2.00817	2.39476e-09	4.94319e-09
10	63945200	63945600	MergedBins_1254	16	*	4.46642	1.40003	-1.67366	0.000283542	0.000424204
10	63946200	63946400	MergedBins_1255	19	*	5.76913	1.66254	-1.79496	1.0852e-05	1.79453e-05
10	63947200	63947800	MergedBins_1256	22	*	3.53592	1.92505	-0.877192	0.0712269	0.085076
10	63948000	63948400	MergedBins_1257	294	*	6.51353	25.7256	1.98169	1.70403e-16	4.7448e-16
10	63950600	63952600	MergedBins_1258	118	*	59.7384	10.3252	-2.53248	7.52985e-76	7.16255e-75
10	63952800	63953200	MergedBins_1259	11	*	4.28032	0.962523	-2.15283	1.91098e-05	3.09391e-05
10	63953400	63953800	MergedBins_1260	0	*	2.04711	0	-7.87006	3.57989e-06	6.07007e-06
10	63955200	63955600	MergedBins_1261	7	*	25.3097	0.612514	-5.3688	2.77405e-58	1.99629e-57
10	63956400	63956800	MergedBins_1262	177	*	2.97761	15.4879	2.37891	2.95996e-12	6.99475e-12
10	63957800	63959000	MergedBins_1263	460	*	24.5653	40.2509	0.7124	5.50087e-07	9.93288e-07
10	63959200	63959600	MergedBins_1264	269	*	5.39692	23.5381	2.12479	3.00448e-16	8.30443e-16
10	63962800	63963600	MergedBins_1265	1018	*	21.5877	89.0771	2.04484	2.27873e-55	1.55182e-54
10	63964000	63964400	MergedBins_1266	59	*	4.46642	5.16262	0.208985	0.630394	0.661381
10	63965400	63965800	MergedBins_1267	123	*	5.39692	10.7628	0.995838	0.000888417	0.00127493
10	63966600	63966800	MergedBins_1268	9	*	3.72202	0.787518	-2.2407	4.67785e-05	7.35929e-05
10	63968600	63968800	MergedBins_1269	3	*	3.16371	0.262506	-3.5912	1.48731e-06	2.59756e-06
10	63971000	63972000	MergedBins_1270	343	*	9.49114	30.0132	1.66094	8.4133e-16	2.28682e-15
10	63972400	63972600	MergedBins_1271	22	*	3.16371	1.92505	-0.716727	0.16677	0.189819
10	63979600	63980000	MergedBins_1272	45	*	5.21082	3.93759	-0.404198	0.297266	0.329029
10	63982400	63982800	MergedBins_1273	668	*	1.11661	58.4514	5.71005	8.57434e-67	7.09772e-66
10	63984400	63984600	MergedBins_1274	0	*	3.53592	0	-8.65855	3.91782e-10	8.4051e-10
10	63997600	63998000	MergedBins_1275	9	*	18.424	0.787518	-4.54813	9.27571e-40	4.62597e-39
10	63999800	64000800	MergedBins_1276	796	*	12.841	69.6516	2.4394	1.59747e-51	9.97621e-51
10	64001200	64002800	MergedBins_1277	1646	*	12.2827	144.028	3.55166	3.78065e-137	1.1204e-135
10	64003200	64003600	MergedBins_1278	32	*	10.9799	2.80007	-1.97134	3.91565e-11	8.80535e-11
10	64005000	64005400	MergedBins_1279	71	*	5.76913	6.21265	0.106855	0.811889	0.835342
10	64020000	64020400	MergedBins_1280	51	*	8.93284	4.4626	-1.00123	0.000642587	0.000929829
10	64020600	64021000	MergedBins_1281	324	*	4.28032	28.3507	2.72759	7.61537e-24	2.66703e-23
10	64022200	64022400	MergedBins_1282	5	*	13.2132	0.43751	-4.91651	1.95718e-29	7.83359e-29
10	64024000	64024200	MergedBins_1283	132	*	3.16371	11.5503	1.86824	1.1822e-07	2.2118e-07
10	64025400	64025800	MergedBins_1284	335	*	5.58303	29.3132	2.39243	3.7566e-22	1.25639e-21
10	64026200	64026400	MergedBins_1285	0	*	2.04711	0	-7.87006	3.57989e-06	6.07007e-06
10	64027800	64028000	MergedBins_1286	0	*	6.14133	0	-9.45502	4.58765e-17	1.30083e-16
10	64031000	64032000	MergedBins_1287	335	*	23.2626	29.3132	0.333537	0.030713	0.0383479
10	64032400	64032800	MergedBins_1288	23	*	12.0966	2.01255	-2.5875	9.60637e-17	2.69949e-16
10	64039000	64040600	MergedBins_1289	1132	*	16.1908	99.0523	2.61302	5.82923e-77	5.63992e-76
10	64041400	64041600	MergedBins_1290	78	*	1.48881	6.82516	2.19671	1.11416e-05	1.83597e-05
10	64061000	64061200	MergedBins_1291	70	*	11.9105	6.12514	-0.959413	0.000131388	0.00020042
10	64062000	64062400	MergedBins_1292	0	*	20.8433	0	-11.218	3.53332e-56	2.44303e-55
10	64065000	64065400	MergedBins_1293	13	*	5.76913	1.13753	-2.34245	1.09577e-07	2.06584e-07
10	64069400	64069800	MergedBins_1294	7	*	31.8232	0.612514	-5.69919	2.00284e-74	1.86739e-73
10	64071600	64072000	MergedBins_1295	3	*	4.65252	0.262506	-4.14759	4.56443e-10	9.77189e-10
10	64075000	64075400	MergedBins_1296	89	*	42.431	7.78768	-2.44585	4.26586e-52	2.69083e-51
10	64084400	64084800	MergedBins_1297	3	*	9.86334	0.262506	-5.23165	5.14711e-23	1.76913e-22
10	64089000	64089400	MergedBins_1298	64	*	9.49114	5.60013	-0.761121	0.0060808	0.00806891
10	64091800	64092200	MergedBins_1299	1426	*	1.11661	124.778	6.8041	2.48499e-144	8.03956e-143
10	64092600	64094200	MergedBins_1300	939	*	12.0966	82.1644	2.76392	5.08639e-67	4.22905e-66
10	64094600	64095000	MergedBins_1301	146	*	4.65252	12.7753	1.45727	1.7036e-06	2.96934e-06
10	64102200	64103000	MergedBins_1302	1243	*	19.7267	108.765	2.46299	3.0947e-80	3.11151e-79
10	64103200	64103400	MergedBins_1303	375	*	0.372202	32.8133	6.46205	2.53986e-59	1.85376e-58
10	64116200	64116600	MergedBins_1304	206	*	6.51353	18.0254	1.46852	9.35428e-09	1.8697e-08
10	64118400	64119600	MergedBins_1305	1505	*	12.4688	131.691	3.40076	1.66953e-122	3.82366e-121
10	64119800	64120200	MergedBins_1306	901	*	4.83862	78.8393	4.02625	1.36429e-80	1.38278e-79
10	64120800	64121000	MergedBins_1307	0	*	0.558303	0	-5.99559	0.0327109	0.0403208
10	64121400	64121800	MergedBins_1308	19	*	0.930504	1.66254	0.837304	0.281223	0.312406
10	64125000	64125600	MergedBins_1309	541	*	11.5383	47.3386	2.03659	5.18429e-30	2.10636e-29
10	64125800	64126000	MergedBins_1310	0	*	0.744403	0	-6.41062	0.0104614	0.0135226
10	64133000	64133400	MergedBins_1311	131	*	9.86334	11.4628	0.216807	0.398126	0.429961
10	64133800	64134600	MergedBins_1312	74	*	15.2603	6.47515	-1.23679	5.7598e-08	1.09985e-07
10	64136200	64136600	MergedBins_1313	0	*	1.48881	0	-7.41062	0.000109441	0.000167597
10	64137600	64138000	MergedBins_1314	124	*	3.16371	10.8503	1.77804	6.27919e-07	1.12967e-06
10	64139400	64140000	MergedBins_1315	635	*	8.56064	55.5638	2.69835	5.4985e-45	3.02699e-44
10	64141000	64141400	MergedBins_1316	9	*	5.39692	0.787518	-2.77675	1.30258e-08	2.57303e-08
10	64153600	64154800	MergedBins_1317	140	*	3.72202	12.2503	1.71866	2.00661e-07	3.71481e-07
10	64155200	64155400	MergedBins_1318	63	*	4.46642	5.51263	0.303622	0.444843	0.477808
10	64157600	64157800	MergedBins_1319	123	*	0.744403	10.7628	3.85382	4.72545e-16	1.29377e-15
10	64158000	64159000	MergedBins_1320	480	*	5.95523	42.001	2.81819	1.66021e-35	7.56781e-35
10	64160400	64160800	MergedBins_1321	23	*	3.72202	2.01255	-0.887062	0.0601893	0.072313
10	64164000	64164200	MergedBins_1322	734	*	0.372202	64.2265	7.43094	6.21878e-119	1.33238e-117
10	64168000	64168800	MergedBins_1323	288	*	9.49114	25.2006	1.4088	3.40225e-11	7.66609e-11
10	64170800	64171200	MergedBins_1324	13	*	2.60541	1.13753	-1.19561	0.0447038	0.0543152
10	64172000	64173000	MergedBins_1325	422	*	6.14133	36.9259	2.58801	2.08168e-29	8.3201e-29
10	64173800	64174400	MergedBins_1326	119	*	0.930504	10.4127	3.48419	1.69219e-14	4.37722e-14
10	64177200	64177800	MergedBins_1327	17	*	3.72202	1.48753	-1.32316	0.00688331	0.00908256
10	64187200	64187400	MergedBins_1328	321	*	0.744403	28.0882	5.23773	1.62521e-47	9.35282e-47
10	64195400	64195600	MergedBins_1329	722	*	7.81624	63.1765	3.01484	2.98479e-55	2.0302e-54
10	64211000	64211400	MergedBins_1330	33	*	1.48881	2.88757	0.955698	0.122482	0.141507
10	64279600	64280000	MergedBins_1331	99	*	0.930504	8.6627	3.21873	1.22335e-11	2.81838e-11
10	64287400	64287800	MergedBins_1332	409	*	4.83862	35.7883	2.88682	5.36576e-31	2.22656e-30
10	64290800	64291200	MergedBins_1333	667	*	11.5383	58.3639	2.33865	7.80296e-42	4.04329e-41
10	64295200	64295600	MergedBins_1334	114	*	8.18844	9.97523	0.284763	0.303638	0.335491
10	64305200	64305400	MergedBins_1335	163	*	2.41931	14.2628	2.55959	4.6756e-12	1.09255e-11
10	64321200	64321400	MergedBins_1336	296	*	6.88573	25.9006	1.9113	5.19134e-16	1.41754e-15
10	64341800	64342200	MergedBins_1337	204	*	4.65252	17.8504	1.93987	1.34552e-11	3.08097e-11
10	64342600	64342800	MergedBins_1338	0	*	0.930504	0	-6.73255	0.0033457	0.00451492
10	64343000	64343200	MergedBins_1339	2	*	0.930504	0.175004	-2.41062	0.0379427	0.0464755
10	64344200	64344800	MergedBins_1340	1359	*	2.04711	118.915	5.8602	7.36657e-135	2.09511e-133
10	64376400	64376600	MergedBins_1341	611	*	0.186101	53.4638	8.16633	2.06959e-100	3.07066e-99
10	64379800	64380000	MergedBins_1342	57	*	0.558303	4.98762	3.15923	5.18721e-07	9.37851e-07
10	64390400	64390600	MergedBins_1343	0	*	1.30271	0	-7.21798	0.000342201	0.000504675
10	64428000	64428600	MergedBins_1344	440	*	2.60541	38.5009	3.88531	1.66768e-39	8.2841e-39
10	64429000	64429400	MergedBins_1345	3	*	1.48881	0.262506	-2.50373	0.00666055	0.00879993
10	64430800	64431000	MergedBins_1346	0	*	0.372202	0	-5.41062	0.102281	0.119131
10	64503400	64503800	MergedBins_1347	8	*	1.67491	0.700016	-1.25862	0.111187	0.129105
10	64509800	64510000	MergedBins_1348	159	*	0.930504	13.9128	3.90226	1.64573e-20	5.20942e-20
10	64546400	64546800	MergedBins_1349	233	*	0.372202	20.388	5.77549	3.84781e-36	1.78275e-35
10	64617800	64618200	MergedBins_1350	565	*	0.744403	49.4387	6.05341	1.53109e-87	1.7533e-86
10	64657000	64657200	MergedBins_1351	537	*	0.186101	46.9886	7.98008	3.6372e-88	4.22073e-87
10	64678400	64679000	MergedBins_1352	340	*	2.23321	29.7507	3.73573	2.74654e-30	1.12156e-29
10	64680000	64680200	MergedBins_1353	0	*	1.86101	0	-7.73255	1.11937e-05	1.83597e-05
10	64683800	64684200	MergedBins_1354	1456	*	1.11661	127.403	6.83414	2.12717e-147	7.32254e-146
10	64701400	64701600	MergedBins_1355	29	*	1.67491	2.53756	0.59936	0.35615	0.38696
10	64730800	64731000	MergedBins_1356	586	*	0.744403	51.2762	6.10606	7.41404e-91	9.11894e-90
10	64732200	64732400	MergedBins_1357	1	*	0.186101	0.087502	-1.0887	0.537347	0.570707
10	64836800	64837000	MergedBins_1358	49	*	0.186101	4.2876	4.52601	1.45212e-07	2.70068e-07
10	64841800	64842200	MergedBins_1359	49	*	0.930504	4.2876	2.20409	0.000116843	0.000178666
10	64880000	64880400	MergedBins_1360	28	*	4.28032	2.45006	-0.804903	0.0631316	0.0757634
10	64891000	64891200	MergedBins_1361	582	*	0.558303	50.9262	6.51122	5.98093e-92	7.5369e-91
10	64974400	64974800	MergedBins_1362	221	*	0.930504	19.338	4.37728	2.62537e-30	1.07324e-29
10	65006000	65006600	MergedBins_1363	1299	*	3.90812	113.665	4.86217	1.33173e-123	3.1261e-122
10	65006800	65007800	MergedBins_1364	367	*	9.86334	32.1133	1.70302	2.77525e-17	7.95313e-17
10	65008000	65008400	MergedBins_1365	167	*	4.09422	14.6128	1.83558	3.26234e-09	6.70094e-09
10	65008800	65009000	MergedBins_1366	169	*	3.90812	14.7878	1.91987	1.0119e-09	2.13718e-09
10	65009400	65009800	MergedBins_1367	6	*	2.23321	0.525012	-2.0887	0.00370243	0.0049844
10	67038800	67039000	MergedBins_1368	0	*	1.30271	0	-7.21798	0.000342201	0.000504675
10	67106800	67107000	MergedBins_1369	25	*	0.930504	2.18755	1.23323	0.079366	0.0944878
10	67170600	67171000	MergedBins_1370	148	*	2.04711	12.9503	2.66133	2.21665e-11	5.03889e-11
10	67200800	67201000	MergedBins_1371	77	*	4.65252	6.73766	0.534234	0.130596	0.150435
10	67236400	67236600	MergedBins_1372	1	*	3.72202	0.087502	-5.41062	1.8298e-09	3.79576e-09
10	68094800	68095000	MergedBins_1373	0	*	3.90812	0	-8.80294	4.00716e-11	8.96648e-11
10	68172600	68173000	MergedBins_1374	1127	*	0.558303	98.6148	7.46461	3.65582e-182	2.04346e-180
10	68233000	68233400	MergedBins_1375	6	*	2.60541	0.525012	-2.31109	0.000659908	0.00095428
10	68235400	68235800	MergedBins_1376	994	*	8.74674	86.977	3.31382	3.14099e-80	3.15244e-79
10	68246600	68246800	MergedBins_1377	564	*	0.372202	49.3512	7.05086	1.18776e-90	1.45298e-89
10	68254800	68255200	MergedBins_1378	92	*	0.930504	8.05019	3.11294	2.08106e-10	4.53003e-10
10	69237000	69237400	MergedBins_1379	1	*	2.97761	0.087502	-5.0887	1.42325e-07	2.64917e-07
10	69239200	69239600	MergedBins_1380	96	*	1.86101	8.4002	2.17434	1.0985e-06	1.95202e-06
10	69539800	69540000	MergedBins_1381	792	*	0.186101	69.3016	8.54066	8.48337e-131	2.28606e-129
10	69555400	69556000	MergedBins_1382	48	*	45.2225	4.2001	-3.42855	1.05789e-78	1.0432e-77
10	69559800	69560000	MergedBins_1383	107	*	0.930504	9.36272	3.33084	1.22552e-12	2.94851e-12
10	69597800	69598400	MergedBins_1384	185	*	3.90812	16.1879	2.05037	3.35798e-11	7.56936e-11
10	69609200	69609800	MergedBins_1385	274	*	1.11661	23.9756	4.42437	1.91633e-26	7.20283e-26
10	69621800	69622000	MergedBins_1386	94	*	0.930504	8.22519	3.14396	7.67361e-11	1.70155e-10
10	69627600	69627800	MergedBins_1387	30	*	2.79151	2.62506	-0.0886959	0.97237	0.981702
10	69641800	69642200	MergedBins_1388	14	*	5.58303	1.22503	-2.18823	6.13714e-07	1.10465e-06
10	69647000	69647800	MergedBins_1389	558	*	23.8209	48.8261	1.03543	1.00177e-13	2.52027e-13
10	69648000	69648400	MergedBins_1390	800	*	10.9799	70.0016	2.67252	7.46541e-56	5.13037e-55
10	69649000	69649200	MergedBins_1391	26	*	7.25793	2.27505	-1.67366	2.47317e-06	4.277e-06
10	69651400	69652000	MergedBins_1392	1278	*	39.4534	111.828	1.50306	1.06782e-48	6.28282e-48
10	69657400	69657800	MergedBins_1393	415	*	9.86334	36.3133	1.88035	1.54623e-21	5.08549e-21
10	69667400	69667600	MergedBins_1394	114	*	2.23321	9.97523	2.15923	1.0999e-07	2.07294e-07
10	69669200	69670000	MergedBins_1395	217	*	3.90812	18.9879	2.28054	3.18696e-14	8.18375e-14
10	69670600	69671000	MergedBins_1396	60	*	2.04711	5.25012	1.35876	0.00434979	0.00583712
10	69671400	69672000	MergedBins_1397	3	*	2.60541	0.262506	-3.31109	2.75572e-05	4.43041e-05
10	69672400	69672800	MergedBins_1398	147	*	7.07183	12.8628	0.863049	0.00112346	0.00158602
10	69673200	69673400	MergedBins_1399	0	*	3.34982	0	-8.58055	1.22503e-09	2.56573e-09
10	69682200	69682600	MergedBins_1400	9	*	5.58303	0.787518	-2.82566	5.03886e-09	1.01832e-08
10	69683600	69684200	MergedBins_1401	250	*	1.67491	21.8755	3.70716	1.51826e-22	5.14024e-22
10	69688000	69688200	MergedBins_1402	328	*	8.37454	28.7007	1.777	2.56955e-16	7.1162e-16
10	69691200	69691600	MergedBins_1403	43	*	2.04711	3.76259	0.878137	0.0922777	0.109066
10	69697200	69697400	MergedBins_1404	7	*	6.14133	0.612514	-3.32574	2.37402e-11	5.38145e-11
10	69700800	69701200	MergedBins_1405	893	*	5.02472	78.1393	3.95893	2.67566e-79	2.65241e-78
10	69711400	69711800	MergedBins_1406	366	*	5.02472	32.0257	2.67212	2.4212e-26	9.09138e-26
10	69722600	69723000	MergedBins_1407	30	*	1.67491	2.62506	0.64827	0.307435	0.339453
10	69725000	69725400	MergedBins_1408	294	*	1.30271	25.7256	4.30362	5.34449e-28	2.07941e-27
10	69746000	69746200	MergedBins_1409	7	*	1.86101	0.612514	-1.60327	0.0346101	0.0425411
10	69798800	69799000	MergedBins_1410	12	*	2.60541	1.05002	-1.31109	0.0292465	0.0365533
10	69909600	69910000	MergedBins_1411	119	*	37.2202	10.4127	-1.83773	1.24541e-31	5.24113e-31
10	69911400	69911600	MergedBins_1412	230	*	1.67491	20.1255	3.58687	1.64439e-20	5.20663e-20
10	70115200	70115400	MergedBins_1413	1	*	1.67491	0.087502	-4.25862	0.000249263	0.00037416
10	70174200	70174400	MergedBins_1414	198	*	2.60541	17.3254	2.73331	4.19984e-15	1.11499e-14
10	71023000	71023200	MergedBins_1415	0	*	1.30271	0	-7.21798	0.000342201	0.000504675
10	71055800	71056000	MergedBins_1416	548	*	0.186101	47.9511	8.00934	6.28426e-90	7.58072e-89
10	71115800	71116000	MergedBins_1417	29	*	3.90812	2.53756	-0.623032	0.171533	0.195024
10	71134800	71135200	MergedBins_1418	59	*	4.83862	5.16262	0.0935075	0.873579	0.892389
10	72297200	72297400	MergedBins_1419	766	*	167.491	67.0266	-1.32128	1.10174e-82	1.15826e-81
10	75287600	75287800	MergedBins_1420	48	*	0.372202	4.2001	3.49627	2.10081e-06	3.64535e-06
10	75296600	75296800	MergedBins_1421	616	*	0.558303	53.9013	6.59313	1.77789e-97	2.51871e-96
10	76595800	76596400	MergedBins_1422	397	*	24.007	34.7383	0.533072	0.000294577	0.000440365
10	76599200	76599600	MergedBins_1423	372	*	3.16371	32.5508	3.363	3.19028e-31	1.33019e-30
10	76709000	76709400	MergedBins_1424	217	*	6.14133	18.9879	1.62846	2.99079e-10	6.47661e-10
10	78315600	78315800	MergedBins_1425	534	*	2.41931	46.7261	4.27156	1.46807e-49	8.76108e-49
10	79077800	79079000	MergedBins_1426	307	*	5.39692	26.8631	2.31542	7.6072e-20	2.36034e-19
10	79080000	79080400	MergedBins_1427	34	*	4.09422	2.97507	-0.460665	0.303621	0.335491
10	79710800	79711000	MergedBins_1428	50	*	44.6642	4.3751	-3.35173	3.16183e-76	3.02032e-75
10	79711200	79711800	MergedBins_1429	353	*	76.8596	30.8882	-1.31517	1.63203e-38	7.94279e-38
10	80227200	80227600	MergedBins_1430	68	*	2.04711	5.95014	1.53934	0.000898382	0.00128873
10	80279600	80280000	MergedBins_1431	59	*	1.86101	5.16262	1.47202	0.00282964	0.00387924
10	80280400	80280800	MergedBins_1432	89	*	7.81624	7.78768	-0.00527984	0.940919	0.95393
10	80761200	80761600	MergedBins_1433	1	*	7.81624	0.087502	-6.48101	4.74755e-20	1.48489e-19
10	80779000	80779400	MergedBins_1434	160	*	0.930504	14.0003	3.9113	9.61313e-21	3.0792e-20
10	80779800	80780200	MergedBins_1435	14	*	4.28032	1.22503	-1.8049	0.000169992	0.000257947
10	81206600	81206800	MergedBins_1436	0	*	9.86334	0	-10.1385	5.7477e-27	2.1947e-26
10	81532800	81533400	MergedBins_1437	2313	*	0.372202	202.392	9.08685	0	0
10	83368200	83368400	MergedBins_1438	2	*	1.86101	0.175004	-3.41062	0.000372165	0.000547721
10	83631400	83631600	MergedBins_1439	100	*	2.23321	8.7502	1.9702	2.30841e-06	3.99758e-06
10	83632400	83632600	MergedBins_1440	775	*	0.372202	67.8141	7.50936	7.68328e-126	1.88591e-124
10	83632800	83633200	MergedBins_1441	38	*	1.86101	3.32508	0.837304	0.133289	0.153286
10	84398600	84398800	MergedBins_1442	0	*	6.51353	0	-9.53991	4.69225e-18	1.38005e-17
10	85013000	85013400	MergedBins_1443	0	*	2.97761	0	-8.41062	1.19772e-08	2.37211e-08
10	86038000	86038200	MergedBins_1444	43	*	0.186101	3.76259	4.33757	1.85969e-06	3.23341e-06
10	86304200	86304400	MergedBins_1445	15	*	2.41931	1.31253	-0.882245	0.150865	0.172585
10	86304800	86305200	MergedBins_1446	17	*	2.04711	1.48753	-0.460665	0.531248	0.564707
10	86323800	86324200	MergedBins_1447	11	*	3.34982	0.962523	-1.79919	0.00105707	0.00150952
10	86345800	86346200	MergedBins_1448	21	*	17.1213	1.83754	-3.21994	5.97099e-29	2.36473e-28
10	86347200	86347600	MergedBins_1449	471	*	17.8657	41.2135	1.20592	2.19228e-14	5.65655e-14
10	86347800	86348200	MergedBins_1450	15	*	3.90812	1.31253	-1.57412	0.00132117	0.00185354
10	86349000	86349400	MergedBins_1451	46	*	15.2603	4.02509	-1.92269	1.50296e-14	3.89664e-14
10	86782600	86783000	MergedBins_1452	0	*	7.81624	0	-9.80294	1.60565e-21	5.26863e-21
10	88110200	88110400	MergedBins_1453	1195	*	0.558303	104.565	7.54914	1.4903e-193	9.56077e-192
10	88130200	88130400	MergedBins_1454	0	*	2.23321	0	-7.99559	1.1449e-06	2.0145e-06
10	88381400	88381600	MergedBins_1455	694	*	0.372202	60.7264	7.3501	3.07594e-112	5.6749e-111
10	88394400	88394800	MergedBins_1456	0	*	2.04711	0	-7.87006	3.57989e-06	6.07007e-06
10	89437800	89438000	MergedBins_1457	0	*	0.372202	0	-5.41062	0.102281	0.119131
10	89752400	89752800	MergedBins_1458	1121	*	7.07183	98.0898	3.79395	3.51338e-97	4.95251e-96
10	89798400	89798800	MergedBins_1459	126	*	1.86101	11.0253	2.56666	1.31003e-09	2.73562e-09
10	91153800	91155000	MergedBins_1460	308	*	22.5182	26.9506	0.259227	0.104109	0.121135
10	91155200	91155800	MergedBins_1461	208	*	11.3522	18.2004	0.681007	0.00134254	0.00188236
10	91157000	91157200	MergedBins_1462	0	*	0.558303	0	-5.99559	0.0327109	0.0403208
10	93181200	93181400	MergedBins_1463	131	*	2.60541	11.4628	2.13737	1.38552e-08	2.73305e-08
10	93188600	93189000	MergedBins_1464	0	*	1.86101	0	-7.73255	1.11937e-05	1.83597e-05
10	93234000	93234600	MergedBins_1465	90	*	5.21082	7.87518	0.595802	0.0682449	0.0816524
10	93476400	93476600	MergedBins_1466	388	*	10.6077	33.9508	1.67833	6.64904e-18	1.94392e-17
10	93697400	93697800	MergedBins_1467	104	*	5.21082	9.10021	0.804389	0.010481	0.0135464
10	93714000	93714200	MergedBins_1468	8	*	0.558303	0.700016	0.326342	1	1
10	93735200	93735400	MergedBins_1469	78	*	0.930504	6.82516	2.87478	1.93314e-08	3.78418e-08
10	93736400	93736600	MergedBins_1470	13	*	0.372202	1.13753	1.61174	0.167398	0.190419
10	93986600	93986800	MergedBins_1471	0	*	0.372202	0	-5.41062	0.102281	0.119131
10	94003200	94003400	MergedBins_1472	0	*	1.11661	0	-6.99559	0.00107	0.00151206
10	95288400	95288600	MergedBins_1473	35	*	4.28032	3.06257	-0.482975	0.266025	0.296163
10	95408400	95408800	MergedBins_1474	113	*	2.79151	9.88773	1.82459	1.43245e-06	2.50601e-06
10	95518600	95519000	MergedBins_1475	694	*	0.744403	60.7264	6.3501	8.97334e-109	1.56355e-107
10	96077600	96078000	MergedBins_1476	349	*	1019.09	30.5382	-5.06052	0	0
10	98974800	98975200	MergedBins_1477	145	*	1.11661	12.6878	3.50625	3.05518e-13	7.53024e-13
10	98975800	98976200	MergedBins_1478	192	*	0.558303	16.8004	4.9113	4.57254e-28	1.78091e-27
10	98976400	98977200	MergedBins_1479	1131	*	6.14133	98.9648	4.01029	1.40972e-100	2.10267e-99
10	98992800	98993200	MergedBins_1480	32	*	0.744403	2.80007	1.9113	0.00647882	0.00857991
10	99018600	99019000	MergedBins_1481	1517	*	3.16371	132.741	5.39085	6.73303e-148	2.36095e-146
10	99022800	99023000	MergedBins_1482	1400	*	5.76913	122.503	4.40832	6.65593e-129	1.76829e-127
10	100023000	100023200	MergedBins_1483	449	*	2.79151	39.2884	3.81499	6.06057e-40	3.03458e-39
10	108163200	108163600	MergedBins_1484	0	*	7.25793	0	-9.69603	4.90867e-20	1.53104e-19
10	108166400	108167000	MergedBins_1485	168	*	3.90812	14.7003	1.9113	1.24934e-09	2.61373e-09
10	108167200	108167400	MergedBins_1486	0	*	2.60541	0	-8.21798	1.17101e-07	2.19159e-07
10	108173600	108174000	MergedBins_1487	23	*	1.86101	2.01255	0.112938	0.983961	0.990982
10	108207600	108207800	MergedBins_1488	67	*	1.67491	5.86264	1.80747	0.000271185	0.000406041
10	108254400	108254600	MergedBins_1489	205	*	0.930504	17.9379	4.26886	9.89201e-28	3.83158e-27
10	108346000	108346200	MergedBins_1490	0	*	0.744403	0	-6.41062	0.0104614	0.0135226
10	109999200	109999600	MergedBins_1491	791	*	0.372202	69.2141	7.53884	1.64171e-128	4.31082e-127
10	110184800	110185200	MergedBins_1492	1239	*	3.16371	108.415	5.0988	1.6564e-119	3.56917e-118
10	110420800	110421000	MergedBins_1493	653	*	0.372202	57.1388	7.26224	1.41699e-105	2.33224e-104
10	111167400	111167800	MergedBins_1494	2029	*	17.8657	177.542	3.31289	5.32436e-162	2.29455e-160
10	111172000	111173200	MergedBins_1495	773	*	9.49114	67.6391	2.8332	1.72649e-56	1.20036e-55
10	111178200	111178400	MergedBins_1496	2	*	2.60541	0.175004	-3.89605	6.92082e-06	1.15647e-05
10	111191600	111191800	MergedBins_1497	0	*	0.558303	0	-5.99559	0.0327109	0.0403208
10	111216200	111216600	MergedBins_1498	88	*	13.9576	7.70018	-0.858083	0.000172102	0.000261043
10	111220600	111221400	MergedBins_1499	559	*	2.79151	48.9136	4.13112	3.933e-51	2.43329e-50
10	111228200	111229000	MergedBins_1500	130	*	4.46642	11.3753	1.34871	1.89941e-05	3.07738e-05
10	111229200	111229600	MergedBins_1501	276	*	0.744403	24.1506	5.01983	2.47293e-40	1.24651e-39
10	111230400	111230800	MergedBins_1502	22	*	1.86101	1.92505	0.0488077	0.919709	0.935534
10	111232200	111232400	MergedBins_1503	7	*	2.23321	0.612514	-1.8663	0.00763638	0.0100446
10	111233600	111234000	MergedBins_1504	405	*	3.72202	35.4383	3.25115	3.37721e-33	1.46831e-32
10	111237200	111237600	MergedBins_1505	1336	*	10.7938	116.903	3.43703	1.31618e-109	2.31119e-108
10	111239400	111240400	MergedBins_1506	1324	*	8.00234	115.853	3.85573	2.2692e-115	4.47928e-114
10	111240800	111241400	MergedBins_1507	0	*	0.930504	0	-6.73255	0.0033457	0.00451492
10	111241600	111242000	MergedBins_1508	286	*	4.46642	25.0256	2.48621	9.93824e-20	3.07601e-19
10	111251000	111251200	MergedBins_1509	266	*	6.14133	23.2755	1.92219	1.32761e-14	3.4643e-14
10	111253400	111253800	MergedBins_1510	207	*	7.25793	18.1129	1.31939	8.54729e-08	1.62197e-07
10	111254400	111254800	MergedBins_1511	2	*	0.744403	0.175004	-2.0887	0.0873242	0.103471
10	111483000	111483400	MergedBins_1512	914	*	2.60541	79.9769	4.94	7.61165e-88	8.75185e-87
10	111484200	111484400	MergedBins_1513	147	*	2.79151	12.8628	2.20409	9.56209e-10	2.02221e-09
10	115378600	115378800	MergedBins_1514	1526	*	2.41931	133.528	5.7864	6.92001e-151	2.56176e-149
10	116495400	116497200	MergedBins_1515	373	*	9.30504	32.6383	1.81048	9.71109e-19	2.91229e-18
10	116497800	116498000	MergedBins_1516	9	*	0.372202	0.787518	1.08123	0.520175	0.553458
10	116541400	116541800	MergedBins_1517	0	*	3.16371	0	-8.49809	3.83046e-09	7.77174e-09
10	116545200	116545400	MergedBins_1518	0	*	24.7514	0	-11.4659	1.41544e-66	1.16315e-65
10	116554000	116554600	MergedBins_1519	41	*	12.6549	3.58758	-1.81861	2.03967e-11	4.64405e-11
10	116565000	116565200	MergedBins_1520	63	*	1.30271	5.51263	2.08123	0.000136176	0.000207582
10	116565800	116566000	MergedBins_1521	177	*	1.30271	15.4879	3.57155	4.82273e-16	1.31912e-15
10	116944800	116945000	MergedBins_1522	0	*	3.90812	0	-8.80294	4.00716e-11	8.96648e-11
10	117071400	117071800	MergedBins_1523	19	*	2.04711	1.66254	-0.3002	0.722972	0.750628
10	117094600	117095000	MergedBins_1524	621	*	3.53592	54.3388	3.94183	1.64504e-55	1.12299e-54
10	117116400	117116600	MergedBins_1525	41	*	0.186101	3.58758	4.26886	2.86936e-06	4.94474e-06
10	117697600	117697800	MergedBins_1526	233	*	1.48881	20.388	3.77549	2.76995e-21	9.0131e-21
10	117833000	117833200	MergedBins_1527	324	*	1.11661	28.3507	4.66619	1.44534e-31	6.07571e-31
10	120783000	120783200	MergedBins_1528	5	*	7.44403	0.43751	-4.0887	2.95999e-15	7.89169e-15
10	120783400	120783800	MergedBins_1529	24	*	19.9128	2.10005	-3.2452	1.02785e-33	4.51049e-33
10	120787000	120787200	MergedBins_1530	65	*	2.79151	5.68763	1.02678	0.0156256	0.0199354
10	120828600	120828800	MergedBins_1531	60	*	4.83862	5.25012	0.117755	0.816439	0.839793
10	120837400	120838000	MergedBins_1532	1182	*	2.79151	103.427	5.21143	1.04441e-114	2.02272e-113
10	120840400	120841200	MergedBins_1533	290	*	7.25793	25.3756	1.80581	7.94623e-15	2.08993e-14
10	120845600	120846800	MergedBins_1534	206	*	13.7715	18.0254	0.388351	0.0538375	0.0649236
10	120848600	120849200	MergedBins_1535	294	*	5.76913	25.7256	2.15678	6.96939e-18	2.03495e-17
10	120852600	120853200	MergedBins_1536	843	*	3.90812	73.7642	4.23838	4.04645e-77	3.92513e-76
10	120854400	120854800	MergedBins_1537	21	*	4.83862	1.83754	-1.39682	0.00106023	0.00151206
10	120857200	120857800	MergedBins_1538	323	*	5.58303	28.2632	2.3398	5.31858e-21	1.71626e-20
10	120859200	120859600	MergedBins_1539	208	*	3.53592	18.2004	2.36382	4.14993e-14	1.06155e-13
10	120865600	120866200	MergedBins_1540	15	*	33.8704	1.31253	-4.6896	3.10512e-73	2.84809e-72
10	120882200	120882400	MergedBins_1541	11	*	0.372202	0.962523	1.37074	0.247632	0.276586
10	120883800	120884200	MergedBins_1542	44	*	0.930504	3.85009	2.04881	0.000598291	0.000868179
10	120884400	120884600	MergedBins_1543	3	*	0.186101	0.262506	0.496267	1	1
10	120889000	120889400	MergedBins_1544	907	*	4.28032	79.3644	4.2127	1.1772e-82	1.23644e-81
10	120959600	120960000	MergedBins_1545	203	*	2.97761	17.7629	2.57664	8.7e-15	2.28499e-14
10	121449600	121450000	MergedBins_1546	31	*	4.09422	2.71256	-0.593931	0.180252	0.204607
10	121451600	121452000	MergedBins_1547	1046	*	0.930504	91.5271	6.62004	4.86876e-165	2.21666e-163
10	123054000	123054200	MergedBins_1548	42	*	8.18844	3.67509	-1.15581	0.000217061	0.000327345
10	123143200	123143400	MergedBins_1549	0	*	0.930504	0	-6.73255	0.0033457	0.00451492
10	123155000	123155400	MergedBins_1550	71	*	2.60541	6.21265	1.2537	0.00317984	0.00434248
10	123156400	123156800	MergedBins_1551	351	*	6.51353	30.7132	2.23735	8.15968e-22	2.70576e-21
10	123165800	123166000	MergedBins_1552	676	*	0.930504	59.1514	5.99026	3.58189e-104	5.76113e-103
10	123166400	123166800	MergedBins_1553	427	*	4.46642	37.3634	3.06443	1.21164e-33	5.31081e-33
10	127425600	127426000	MergedBins_1554	41	*	3.53592	3.58758	0.0209286	0.931365	0.946113
10	127455800	127456000	MergedBins_1555	62	*	0.930504	5.42513	2.54357	2.4624e-06	4.25969e-06
10	127697600	127697800	MergedBins_1556	12	*	0.186101	1.05002	2.49627	0.074454	0.0888177
10	128036400	128036600	MergedBins_1557	152	*	11.1661	13.3003	0.252341	0.282351	0.313443
10	128039000	128044800	MergedBins_1558	14264	*	363.641	1248.13	1.77918	0	0
10	128045000	128045200	MergedBins_1559	144	*	6.14133	12.6003	1.03684	0.000196167	0.000296509
10	128046600	128046800	MergedBins_1560	217	*	26.2402	18.9879	-0.466696	0.00320849	0.00438054
10	128047600	128047800	MergedBins_1561	187	*	27.3568	16.3629	-0.741474	3.23248e-06	5.55778e-06
10	128089000	128089200	MergedBins_1562	123	*	64.577	10.7628	-2.58497	7.30019e-84	7.88016e-83
10	128090000	128090200	MergedBins_1563	252	*	91.5616	22.0505	-2.05393	2.17266e-88	2.52902e-87
10	128361000	128361200	MergedBins_1564	0	*	21.0294	0	-11.2308	1.12999e-56	7.87576e-56
10	128362000	128362400	MergedBins_1565	21	*	43.7337	1.83754	-4.5729	5.66673e-93	7.27908e-92
10	128392400	128392600	MergedBins_1566	0	*	0.558303	0	-5.99559	0.0327109	0.0403208
10	128469000	128469200	MergedBins_1567	13	*	50.9916	1.13753	-5.48629	4.89922e-117	1.00212e-115
10	128677600	128678000	MergedBins_1568	55	*	3.53592	4.81261	0.444736	0.299082	0.330747
10	128678200	128678400	MergedBins_1569	3	*	3.90812	0.262506	-3.89605	2.72277e-08	5.29865e-08
11	3155800	3156600	MergedBins_1570	99	*	8.93284	8.6627	-0.0443017	0.931323	0.946113
11	3315200	3315600	MergedBins_1571	1	*	12.4688	0.087502	-7.15479	3.13433e-32	1.33748e-31
11	3525400	3526000	MergedBins_1572	157	*	14.702	13.7378	-0.0978559	0.672999	0.70249
11	4541400	4541600	MergedBins_1573	445	*	1.67491	38.9384	4.53904	1.89358e-42	9.92133e-42
11	4574800	4575200	MergedBins_1574	21	*	15.2603	1.83754	-3.05393	1.08182e-24	3.89629e-24
11	4577200	4577600	MergedBins_1575	26	*	8.56064	2.27505	-1.91182	1.35808e-08	2.68032e-08
11	4589400	4589600	MergedBins_1576	47	*	2.23321	4.1126	0.88093	0.075435	0.0899405
11	4592200	4592600	MergedBins_1577	27	*	21.7738	2.36256	-3.20417	2.49239e-36	1.16144e-35
11	4836800	4837200	MergedBins_1578	0	*	1.86101	0	-7.73255	1.11937e-05	1.83597e-05
11	4992800	4993000	MergedBins_1579	13	*	2.23321	1.13753	-0.973219	0.132881	0.152864
11	5003400	5003600	MergedBins_1580	589	*	0.930504	51.5387	5.7915	7.397e-90	8.89452e-89
11	5207000	5207200	MergedBins_1581	8	*	1.11661	0.700016	-0.673658	0.557891	0.590526
11	5279600	5279800	MergedBins_1582	0	*	1.67491	0	-7.58055	3.50006e-05	5.545e-05
11	5394000	5394200	MergedBins_1583	604	*	0.186101	52.8512	8.14971	2.54118e-99	3.72629e-98
11	5433600	5434400	MergedBins_1584	301	*	4.83862	26.3381	2.44448	2.08884e-20	6.59354e-20
11	5751000	5751600	MergedBins_1585	202	*	4.83862	17.6754	1.86908	4.3668e-11	9.75575e-11
11	5789800	5790200	MergedBins_1586	10	*	0.372202	0.87502	1.23323	0.359991	0.390795
11	6300400	6300800	MergedBins_1587	91	*	2.41931	7.96269	1.71866	3.25934e-05	5.21929e-05
11	6315800	6316200	MergedBins_1588	1144	*	0.186101	100.102	9.07118	1.48001e-189	9.03288e-188
11	6320800	6321200	MergedBins_1589	139	*	5.39692	12.1628	1.17226	6.12628e-05	9.58324e-05
11	6322200	6322600	MergedBins_1590	4	*	4.28032	0.350008	-3.61226	1.66735e-08	3.27012e-08
11	6323600	6324000	MergedBins_1591	202	*	5.02472	17.6754	1.81463	9.15481e-11	2.02482e-10
11	6324200	6324600	MergedBins_1592	14	*	2.60541	1.22503	-1.0887	0.0655231	0.0785123
11	6331800	6332000	MergedBins_1593	55	*	1.30271	4.81261	1.88531	0.000787926	0.00113374
11	6392000	6392600	MergedBins_1594	524	*	15.8186	45.8511	1.53534	2.23483e-21	7.2929e-21
11	6393400	6393800	MergedBins_1595	24	*	1.48881	2.10005	0.496267	0.511026	0.544288
11	6419000	6419600	MergedBins_1596	94	*	13.2132	8.22519	-0.683854	0.00308107	0.00421167
11	6564800	6565000	MergedBins_1597	9	*	1.67491	0.787518	-1.0887	0.165631	0.188579
11	6581400	6581600	MergedBins_1598	682	*	0.186101	59.6764	8.32493	3.08259e-112	5.6779e-111
11	9004800	9005000	MergedBins_1599	255	*	1.30271	22.313	4.0983	5.21387e-24	1.83853e-23
11	11853400	11853800	MergedBins_1600	1560	*	3.72202	136.503	5.19671	9.46297e-151	3.49171e-149
11	11856600	11857000	MergedBins_1601	45	*	12.841	3.93759	-1.70537	1.24118e-10	2.7366e-10
11	11858600	11859000	MergedBins_1602	413	*	13.9576	36.1383	1.37248	5.28505e-15	1.39522e-14
11	11868000	11868200	MergedBins_1603	37	*	0.186101	3.23758	4.12076	1.26997e-05	2.07635e-05
11	11869200	11869800	MergedBins_1604	29	*	8.74674	2.53756	-1.7853	4.80295e-08	9.18999e-08
11	11870000	11870400	MergedBins_1605	416	*	1.30271	36.4009	4.80439	1.74513e-40	8.83205e-40
11	11870800	11871200	MergedBins_1606	6	*	11.9105	0.525012	-4.50373	5.90619e-26	2.19437e-25
11	11930400	11931200	MergedBins_1607	47	*	103.472	4.1126	-4.65305	4.74416e-220	4.18487e-218
11	11931600	11932200	MergedBins_1608	388	*	41.5005	33.9508	-0.289683	0.0187669	0.0237846
11	11933200	11933600	MergedBins_1609	80	*	24.9375	7.00016	-1.83286	1.49087e-21	4.90769e-21
11	11944800	11945000	MergedBins_1610	232	*	10.9799	20.3005	0.886642	2.45565e-05	3.95475e-05
11	11945400	11945600	MergedBins_1611	219	*	10.0494	19.1629	0.931204	2.06716e-05	3.34005e-05
11	11949800	11950600	MergedBins_1612	343	*	12.2827	30.0132	1.28897	9.27039e-12	2.14316e-11
11	11956200	11956400	MergedBins_1613	0	*	33.8704	0	-11.9184	7.77048e-91	9.54695e-90
11	11959600	11960200	MergedBins_1614	442	*	80.3956	38.6759	-1.05568	2.97129e-28	1.16086e-27
11	11961000	11961200	MergedBins_1615	0	*	2.79151	0	-8.31751	3.74505e-08	7.20241e-08
11	11961600	11962000	MergedBins_1616	20	*	14.3298	1.75004	-3.03355	4.14448e-23	1.42582e-22
11	11962600	11963000	MergedBins_1617	14	*	5.21082	1.22503	-2.0887	3.2533e-06	5.58847e-06
11	11963400	11963600	MergedBins_1618	123	*	13.5854	10.7628	-0.336006	0.132743	0.152737
11	11971600	11972400	MergedBins_1619	1193	*	2.97761	104.39	5.13168	2.54942e-115	5.01491e-114
11	11972600	11974000	MergedBins_1620	563	*	13.5854	49.2637	1.85847	2.33989e-28	9.15762e-28
11	11976400	11976600	MergedBins_1621	32	*	3.53592	2.80007	-0.336623	0.510958	0.544288
11	11978600	11979000	MergedBins_1622	178	*	0.930504	15.5754	4.06511	1.81223e-23	6.28628e-23
11	11981200	11981800	MergedBins_1623	94	*	1.30271	8.22519	2.65854	1.21542e-07	2.27094e-07
11	11982000	11983400	MergedBins_1624	414	*	6.69963	36.2258	2.43487	1.84849e-27	7.1136e-27
11	11983600	11984200	MergedBins_1625	199	*	7.81624	17.4129	1.15561	1.7948e-06	3.12299e-06
11	11984600	11984800	MergedBins_1626	51	*	7.63013	4.4626	-0.773823	0.013282	0.0170553
11	11985200	11986000	MergedBins_1627	118	*	30.3344	10.3252	-1.55478	1.54237e-20	4.91252e-20
11	11994200	11994400	MergedBins_1628	0	*	20.6572	0	-11.205	1.10482e-55	7.5695e-55
11	12000000	12000200	MergedBins_1629	136	*	3.90812	11.9003	1.60645	8.97542e-07	1.6035e-06
11	12000600	12001000	MergedBins_1630	72	*	4.46642	6.30015	0.496267	0.174716	0.198463
11	12001400	12001800	MergedBins_1631	128	*	1.48881	11.2003	2.9113	1.24397e-10	2.74154e-10
11	12002800	12003000	MergedBins_1632	87	*	2.04711	7.61268	1.89482	1.7281e-05	2.80748e-05
11	12004600	12005200	MergedBins_1633	145	*	20.4711	12.6878	-0.690146	0.000175131	0.000265423
11	12006000	12006400	MergedBins_1634	2	*	3.72202	0.175004	-4.41062	1.40033e-08	2.75984e-08
11	12009200	12009400	MergedBins_1635	0	*	7.44403	0	-9.73255	1.56985e-20	4.98039e-20
11	12009800	12010600	MergedBins_1636	474	*	16.9352	41.476	1.29225	8.57945e-16	2.33142e-15
11	12010800	12011400	MergedBins_1637	386	*	2.97761	33.7758	3.50376	4.31196e-33	1.87183e-32
11	12012400	12012800	MergedBins_1638	41	*	6.51353	3.58758	-0.860427	0.0121706	0.0156638
11	12014600	12015000	MergedBins_1639	49	*	5.58303	4.2876	-0.380877	0.307009	0.339181
11	12016800	12017200	MergedBins_1640	245	*	12.841	21.438	0.739418	0.000182969	0.000276819
11	12017800	12018200	MergedBins_1641	87	*	6.69963	7.61268	0.184323	0.583358	0.615637
11	12021600	12022000	MergedBins_1642	151	*	17.3074	13.2128	-0.38945	0.0470862	0.0570501
11	12024000	12024200	MergedBins_1643	17	*	7.07183	1.48753	-2.24916	8.6048e-09	1.72233e-08
11	12036000	12036200	MergedBins_1644	86	*	13.7715	7.52518	-0.871884	0.000153722	0.000233667
11	12296000	12296400	MergedBins_1645	743	*	3.90812	65.014	4.05621	6.01705e-67	4.99548e-66
11	16735800	16736200	MergedBins_1646	751	*	0	65.714	11.7859	4.04113e-126	1.00282e-124
11	17169800	17170000	MergedBins_1647	7	*	0.186101	0.612514	1.71866	0.449694	0.482698
11	17183400	17183600	MergedBins_1648	33	*	0.186101	2.88757	3.9557	5.59927e-05	8.77587e-05
11	18897600	18897800	MergedBins_1649	705	*	1.11661	61.6889	5.78782	1.40036e-70	1.23334e-69
11	18979400	18979800	MergedBins_1650	82	*	3.16371	7.17517	1.18139	0.00227596	0.00314231
11	18983800	18984000	MergedBins_1651	0	*	3.90812	0	-8.80294	4.00716e-11	8.96648e-11
11	18985600	18986000	MergedBins_1652	6	*	11.3522	0.525012	-4.43447	1.38743e-24	4.98582e-24
11	18986600	18986800	MergedBins_1653	754	*	0.930504	65.9765	6.1478	5.50952e-117	1.12289e-115
11	20089400	20089800	MergedBins_1654	111	*	0.744403	9.71273	3.70572	3.70016e-14	9.48434e-14
11	21100600	21101200	MergedBins_1655	100	*	2.23321	8.7502	1.9702	2.30841e-06	3.99758e-06
11	21122400	21122800	MergedBins_1656	84	*	4.28032	7.35017	0.78006	0.0262827	0.0329694
11	21252400	21252600	MergedBins_1657	589	*	0.186101	51.5387	8.11343	7.09034e-97	9.93264e-96
11	21344200	21345000	MergedBins_1658	369	*	4.28032	32.2883	2.91522	2.69423e-28	1.05298e-27
11	21557400	21557600	MergedBins_1659	94	*	51.3638	8.22519	-2.64263	1.02734e-68	8.78763e-68
11	21558400	21558600	MergedBins_1660	51	*	20.0989	4.4626	-2.17116	5.83131e-22	1.9405e-21
11	21778000	21778200	MergedBins_1661	236	*	0.186101	20.6505	6.79395	2.98787e-38	1.44852e-37
11	22025400	22026000	MergedBins_1662	19	*	5.02472	1.66254	-1.59566	0.000194035	0.000293365
11	22026400	22027000	MergedBins_1663	211	*	5.95523	18.4629	1.6324	5.00442e-10	1.06997e-09
11	22027800	22028200	MergedBins_1664	173	*	1.30271	15.1379	3.53858	1.23289e-15	3.33507e-15
11	22030800	22031400	MergedBins_1665	264	*	7.07183	23.1005	1.70777	7.70685e-13	1.86694e-12
11	22032000	22032600	MergedBins_1666	639	*	4.46642	55.9138	3.64601	5.64676e-55	3.81634e-54
11	22042600	22042800	MergedBins_1667	3	*	2.04711	0.262506	-2.96316	0.000461873	0.000675432
11	22043600	22044000	MergedBins_1668	195	*	15.2603	17.0629	0.161082	0.432834	0.465574
11	22066800	22067200	MergedBins_1669	1595	*	12.841	139.566	3.44212	1.22013e-130	3.27232e-129
11	22068800	22070000	MergedBins_1670	1872	*	5.76913	163.804	4.82747	5.31209e-177	2.80275e-175
11	22070200	22071800	MergedBins_1671	2975	*	25.1236	260.319	3.37316	2.70153e-239	2.90505e-237
11	22072000	22072800	MergedBins_1672	332	*	10.2355	29.0507	1.50498	1.00276e-13	2.5222e-13
11	22079000	22079200	MergedBins_1673	0	*	11.7244	0	-10.3879	6.43336e-32	2.72057e-31
11	22080200	22080800	MergedBins_1674	0	*	6.14133	0	-9.45502	4.58765e-17	1.30083e-16
11	22084000	22085000	MergedBins_1675	894	*	4.28032	78.2268	4.19187	2.47425e-81	2.54201e-80
11	22085400	22086000	MergedBins_1676	11	*	6.32743	0.962523	-2.71673	1.01277e-09	2.13821e-09
11	22086200	22086600	MergedBins_1677	36	*	1.30271	3.15007	1.27387	0.040934	0.0499066
11	22087200	22087400	MergedBins_1678	124	*	3.53592	10.8503	1.61757	2.55674e-06	4.41814e-06
11	22122400	22122600	MergedBins_1679	59	*	0.930504	5.16262	2.47202	5.90369e-06	9.88412e-06
11	22123000	22123600	MergedBins_1680	59	*	0.930504	5.16262	2.47202	5.90369e-06	9.88412e-06
11	22127200	22127600	MergedBins_1681	77	*	3.53592	6.73766	0.930163	0.0142324	0.0182279
11	22128400	22128800	MergedBins_1682	48	*	10.6077	4.2001	-1.33662	1.62128e-06	2.82717e-06
11	22132800	22133000	MergedBins_1683	554	*	1.11661	48.4761	5.44008	4.01171e-55	2.72213e-54
11	22151800	22152000	MergedBins_1684	5	*	8.18844	0.43751	-4.2262	4.80764e-17	1.36253e-16
11	22161000	22161800	MergedBins_1685	388	*	12.6549	33.9508	1.42375	8.16835e-15	2.14735e-14
11	22162200	22162600	MergedBins_1686	390	*	2.60541	34.1258	3.71128	2.00022e-34	8.88454e-34
11	22164200	22164600	MergedBins_1687	0	*	2.79151	0	-8.31751	3.74505e-08	7.20241e-08
11	22165200	22166400	MergedBins_1688	1148	*	10.7938	100.452	3.21823	9.46674e-91	1.16184e-89
11	22167400	22167800	MergedBins_1689	213	*	5.21082	18.6379	1.83866	1.96198e-11	4.47257e-11
11	22168000	22168400	MergedBins_1690	186	*	15.0742	16.2754	0.110613	0.609719	0.640821
11	23379000	23379400	MergedBins_1691	117	*	4.65252	10.2377	1.13781	0.000339693	0.000504675
11	23397000	23397400	MergedBins_1692	136	*	3.34982	11.9003	1.82884	1.07809e-07	2.03353e-07
11	23571000	23571400	MergedBins_1693	0	*	4.46642	0	-8.99559	1.31077e-12	3.1349e-12
11	23606600	23606800	MergedBins_1694	765	*	0.372202	66.9391	7.49062	4.82252e-124	1.15363e-122
11	24098000	24098200	MergedBins_1695	0	*	0.930504	0	-6.73255	0.0033457	0.00451492
11	24113600	24114000	MergedBins_1696	17	*	6.51353	1.48753	-2.13052	1.0774e-07	2.03257e-07
11	26401000	26401200	MergedBins_1697	0	*	1.11661	0	-6.99559	0.00107	0.00151206
11	26444600	26444800	MergedBins_1698	0	*	0.558303	0	-5.99559	0.0327109	0.0403208
11	26445400	26445600	MergedBins_1699	0	*	0.186101	0	-4.41062	0.319814	0.349765
11	29143200	29143400	MergedBins_1700	0	*	1.30271	0	-7.21798	0.000342201	0.000504675
11	29185000	29185200	MergedBins_1701	48	*	0.744403	4.2001	2.49627	4.26061e-05	6.72066e-05
11	29186200	29186600	MergedBins_1702	39	*	6.69963	3.41258	-0.973219	0.00436408	0.0058535
11	29706800	29707400	MergedBins_1703	48	*	86.723	4.2001	-4.36792	2.25132e-178	1.20472e-176
11	30099400	30099800	MergedBins_1704	33	*	89.1423	2.88757	-4.94818	1.84677e-195	1.24862e-193
11	30100000	30100800	MergedBins_1705	70	*	57.8774	6.12514	-3.24018	2.17881e-95	2.96754e-94
11	30106000	30106800	MergedBins_1706	111	*	20.8433	9.71273	-1.10163	7.96611e-09	1.59761e-08
11	30109800	30110000	MergedBins_1707	9	*	46.7113	0.787518	-5.89031	1.07081e-109	1.88325e-108
11	30110600	30111000	MergedBins_1708	128	*	76.1152	11.2003	-2.76465	2.27179e-106	3.80012e-105
11	30112800	30113000	MergedBins_1709	82	*	45.2225	7.17517	-2.65596	5.16671e-61	3.85574e-60
11	30113800	30114000	MergedBins_1710	58	*	94.5392	5.07512	-4.2194	2.71781e-190	1.67687e-188
11	30114600	30115000	MergedBins_1711	61	*	81.5122	5.33762	-3.93275	9.21598e-157	3.68999e-155
11	30116600	30118600	MergedBins_1712	542	*	228.904	47.4261	-2.27099	7.59332e-250	8.66021e-248
11	30119200	30119600	MergedBins_1713	89	*	51.3638	7.78768	-2.72149	5.12603e-71	4.53945e-70
11	30121000	30121200	MergedBins_1714	36	*	39.2673	3.15007	-3.63987	5.68176e-72	5.11178e-71
11	30121400	30121600	MergedBins_1715	69	*	38.8951	6.03764	-2.68753	2.27471e-53	1.48033e-52
11	30130800	30132400	MergedBins_1716	1249	*	6.88573	109.29	3.98841	1.24548e-110	2.22159e-109
11	30133400	30133600	MergedBins_1717	1	*	0.372202	0.087502	-2.0887	0.241421	0.26997
11	30137000	30137600	MergedBins_1718	94	*	87.2813	8.22519	-3.40755	9.16299e-150	3.316e-148
11	30138200	30139400	MergedBins_1719	110	*	172.888	9.62523	-4.16687	0	0
11	30142200	30142600	MergedBins_1720	148	*	40.0117	12.9503	-1.62744	1.67149e-28	6.57588e-28
11	30143000	30143200	MergedBins_1721	92	*	32.1954	8.05019	-1.99976	6.77016e-31	2.80007e-30
11	30144000	30144200	MergedBins_1722	43	*	18.9823	3.76259	-2.33486	9.64088e-23	3.28174e-22
11	30145800	30146200	MergedBins_1723	159	*	48.2001	13.9128	-1.79262	3.7691e-39	1.85838e-38
11	30146600	30147000	MergedBins_1724	153	*	65.3214	13.3878	-2.28664	4.53847e-73	4.14595e-72
11	30149400	30149600	MergedBins_1725	14	*	53.7831	1.22503	-5.45627	3.8779e-123	9.04656e-122
11	30149800	30150200	MergedBins_1726	2	*	32.9398	0.175004	-7.5563	1.72112e-84	1.8776e-83
11	30151400	30151800	MergedBins_1727	2	*	27.729	0.175004	-7.30786	8.93618e-71	7.89502e-70
11	30154200	30154400	MergedBins_1728	16	*	20.8433	1.40003	-3.89605	8.74239e-41	4.44041e-40
11	30155800	30156200	MergedBins_1729	1853	*	10.7938	162.141	3.90897	7.97889e-162	3.39961e-160
11	30157200	30157600	MergedBins_1730	200	*	4.09422	17.5004	2.09573	2.97259e-12	7.02313e-12
11	30163600	30164000	MergedBins_1731	33	*	8.37454	2.88757	-1.53615	2.06248e-06	3.57993e-06
11	30164600	30165000	MergedBins_1732	14	*	2.23321	1.22503	-0.866303	0.180513	0.204883
11	30168800	30169400	MergedBins_1733	221	*	7.81624	19.338	1.30689	3.76818e-08	7.24566e-08
11	30176200	30176400	MergedBins_1734	11	*	5.21082	0.962523	-2.43662	2.47963e-07	4.57028e-07
11	30184200	30184600	MergedBins_1735	124	*	21.0294	10.8503	-0.954679	3.18971e-07	5.8504e-07
11	30193800	30194000	MergedBins_1736	25	*	4.46642	2.18755	-1.0298	0.016484	0.0209643
11	30194400	30194600	MergedBins_1737	6	*	2.04711	0.525012	-1.96316	0.00846585	0.0111097
11	30197400	30197600	MergedBins_1738	66	*	15.0742	5.77514	-1.38415	3.1824e-09	6.5403e-09
11	30199200	30199600	MergedBins_1739	246	*	3.16371	21.5255	2.76636	1.2897e-18	3.86056e-18
11	30200600	30202800	MergedBins_1740	2359	*	21.4016	206.417	3.26977	1.50962e-186	8.78615e-185
11	30204800	30206200	MergedBins_1741	878	*	22.5182	76.8268	1.77052	3.96048e-41	2.0271e-40
11	30213600	30214000	MergedBins_1742	6	*	7.25793	0.525012	-3.78914	1.30355e-14	3.40311e-14
11	30215400	30216200	MergedBins_1743	251	*	10.7938	21.963	1.02487	8.7324e-07	1.56132e-06
11	30216800	30217000	MergedBins_1744	37	*	7.07183	3.23758	-1.12717	0.000820685	0.00118058
11	30234600	30234800	MergedBins_1745	0	*	4.09422	0	-8.87006	1.28154e-11	2.93805e-11
11	30235200	30236000	MergedBins_1746	122	*	6.69963	10.6752	0.672116	0.0166999	0.0212198
11	30256400	30257000	MergedBins_1747	104	*	17.6796	9.10021	-0.958112	2.73287e-06	4.71384e-06
11	30259200	30259400	MergedBins_1748	528	*	5.02472	46.2011	3.20081	1.97791e-42	1.03583e-41
11	30548800	30549200	MergedBins_1749	782	*	1.11661	68.4266	5.93737	1.84605e-78	1.8125e-77
11	30599000	30599400	MergedBins_1750	13	*	4.46642	1.13753	-1.97322	3.91625e-05	6.19132e-05
11	30782400	30782800	MergedBins_1751	139	*	0.744403	12.1628	4.03025	1.39468e-18	4.16928e-18
11	30861800	30862200	MergedBins_1752	223	*	8.00234	19.513	1.28594	4.63054e-08	8.87063e-08
11	35264600	35265000	MergedBins_1753	61	*	0.744403	5.33762	2.84204	7.63732e-07	1.37008e-06
11	35281000	35281200	MergedBins_1754	0	*	0.372202	0	-5.41062	0.102281	0.119131
11	35336800	35337000	MergedBins_1755	138	*	2.04711	12.0753	2.5604	2.15145e-10	4.67954e-10
11	40702200	40702600	MergedBins_1756	27	*	5.02472	2.36256	-1.0887	0.00708011	0.00933133
11	43687800	43688200	MergedBins_1757	191	*	5.21082	16.7129	1.68138	1.76209e-09	3.66202e-09
11	43696200	43696400	MergedBins_1758	28	*	1.67491	2.45006	0.548734	0.410859	0.442992
11	43698200	43698400	MergedBins_1759	687	*	0.186101	60.1139	8.33547	3.66338e-113	6.8824e-112
11	44462800	44463200	MergedBins_1760	8	*	2.41931	0.700016	-1.78914	0.00680717	0.00898945
11	44529200	44529600	MergedBins_1761	130	*	1.30271	11.3753	3.12632	2.88925e-11	6.52451e-11
11	44651800	44652000	MergedBins_1762	695	*	12.6549	60.8139	2.26471	2.88045e-42	1.50361e-41
11	44662000	44662200	MergedBins_1763	94	*	13.0271	8.22519	-0.66339	0.00430827	0.00578278
11	44664200	44664400	MergedBins_1764	1	*	0.930504	0.087502	-3.41062	0.0147242	0.0188088
11	44687600	44688000	MergedBins_1765	25	*	2.04711	2.18755	0.0957287	0.996206	1
11	44688200	44688800	MergedBins_1766	20	*	2.60541	1.75004	-0.574123	0.33419	0.364574
11	44737400	44737600	MergedBins_1767	4	*	4.83862	0.350008	-3.78914	8.44063e-10	1.78839e-09
11	44742000	44742400	MergedBins_1768	231	*	13.2132	20.213	0.613306	0.00196949	0.00273504
11	44744600	44745000	MergedBins_1769	10	*	1.86101	0.87502	-1.0887	0.136749	0.157042
11	44747600	44747800	MergedBins_1770	7	*	0.930504	0.612514	-0.603269	0.538478	0.571747
11	44748400	44748800	MergedBins_1771	16	*	2.04711	1.40003	-0.548127	0.441564	0.474648
11	44750200	44750400	MergedBins_1772	10	*	2.23321	0.87502	-1.35173	0.0412899	0.0502809
11	44751000	44751400	MergedBins_1773	254	*	1.86101	22.2255	3.57806	1.74144e-22	5.86768e-22
11	44754400	44754600	MergedBins_1774	29	*	0.372202	2.53756	2.76929	0.00150951	0.00211018
11	44756800	44757000	MergedBins_1775	22	*	1.30271	1.92505	0.563381	0.479848	0.513041
11	44765600	44765800	MergedBins_1776	71	*	1.11661	6.21265	2.47609	9.47529e-06	1.57101e-05
11	44771800	44772200	MergedBins_1777	266	*	2.60541	23.2755	3.15923	6.83484e-22	2.2711e-21
11	44782600	44782800	MergedBins_1778	526	*	2.04711	46.0261	4.49079	9.9258e-50	5.93917e-49
11	44841800	44842000	MergedBins_1779	1	*	1.48881	0.087502	-4.0887	0.000704961	0.00101605
11	46061200	46061400	MergedBins_1780	0	*	8.56064	0	-9.93419	1.67969e-23	5.83372e-23
11	46080600	46081200	MergedBins_1781	218	*	8.56064	19.0754	1.15593	5.57684e-07	1.0062e-06
11	46085000	46085200	MergedBins_1782	24	*	1.48881	2.10005	0.496267	0.511026	0.544288
11	46092400	46092600	MergedBins_1783	6	*	0.930504	0.525012	-0.825661	0.344865	0.375349
11	46145400	46145800	MergedBins_1784	3	*	5.21082	0.262506	-4.31109	2.03701e-11	4.63893e-11
11	46146400	46147000	MergedBins_1785	78	*	15.0742	6.82516	-1.14314	4.61912e-07	8.36748e-07
11	47015800	47016000	MergedBins_1786	2	*	1.67491	0.175004	-3.25862	0.000977956	0.00139951
11	47031600	47031800	MergedBins_1787	14	*	0.372202	1.22503	1.71866	0.112221	0.130198
11	47037800	47038200	MergedBins_1788	0	*	1.11661	0	-6.99559	0.00107	0.00151206
11	47055600	47056000	MergedBins_1789	22	*	2.79151	1.92505	-0.536155	0.347204	0.377639
11	47056400	47056600	MergedBins_1790	14	*	0.558303	1.22503	1.1337	0.298884	0.330593
11	47070800	47071200	MergedBins_1791	1	*	1.11661	0.087502	-3.67366	0.0054368	0.00724074
11	47073000	47073400	MergedBins_1792	26	*	6.69963	2.27505	-1.55818	1.97848e-05	3.19906e-05
11	47095600	47095800	MergedBins_1793	0	*	1.48881	0	-7.41062	0.000109441	0.000167597
11	47142200	47142400	MergedBins_1794	558	*	0.186101	48.8261	8.03543	9.64268e-92	1.20973e-90
11	47272400	47272600	MergedBins_1795	25	*	2.60541	2.18755	-0.252195	0.724327	0.75162
11	47273600	47274000	MergedBins_1796	43	*	3.34982	3.76259	0.167644	0.78186	0.807314
11	47284800	47285200	MergedBins_1797	8	*	2.04711	0.700016	-1.54813	0.029566	0.0369322
11	47285600	47286000	MergedBins_1798	0	*	5.02472	0	-9.16551	4.2876e-14	1.09207e-13
11	47326800	47327000	MergedBins_1799	24	*	0.186101	2.10005	3.49627	0.00183436	0.00255354
11	47330000	47330200	MergedBins_1800	3	*	0.372202	0.262506	-0.503733	0.657723	0.68737
11	47332200	47332600	MergedBins_1801	140	*	0.930504	12.2503	3.71866	1.42789e-17	4.13922e-17
11	47332800	47333200	MergedBins_1802	120	*	1.86101	10.5002	2.49627	5.10449e-09	1.03122e-08
11	49205000	49205200	MergedBins_1803	319	*	3.34982	27.9132	3.05879	1.86282e-25	6.8378e-25
11	49208600	49209000	MergedBins_1804	1206	*	9.86334	105.527	3.4194	8.24233e-99	1.19313e-97
11	49209400	49209800	MergedBins_1805	1	*	0.930504	0.087502	-3.41062	0.0147242	0.0188088
11	50040400	50040800	MergedBins_1806	1168	*	0.558303	102.202	7.51617	4.1597e-189	2.47196e-187
11	50285800	50286000	MergedBins_1807	0	*	1.86101	0	-7.73255	1.11937e-05	1.83597e-05
11	50297000	50297400	MergedBins_1808	237	*	143.856	20.738	-2.79428	5.29077e-202	3.93014e-200
11	50298000	50298400	MergedBins_1809	147	*	146.089	12.8628	-3.50557	8.37352e-256	1.01662e-253
11	51597000	51597200	MergedBins_1810	901	*	3.72202	78.8393	4.40476	1.619e-83	1.73435e-82
11	52379400	52379800	MergedBins_1811	2	*	0.744403	0.175004	-2.0887	0.0873242	0.103471
11	52385600	52385800	MergedBins_1812	200	*	15.2603	17.5004	0.197608	0.32633	0.356619
11	52387400	52387600	MergedBins_1813	198	*	12.6549	17.3254	0.453198	0.0293766	0.0367119
11	52388400	52388600	MergedBins_1814	145	*	9.67724	12.6878	0.390774	0.108607	0.126226
11	52388800	52389400	MergedBins_1815	480	*	62.5299	42.001	-0.574123	2.21541e-08	4.32622e-08
11	53354800	53355000	MergedBins_1816	6	*	2.23321	0.525012	-2.0887	0.00370243	0.0049844
11	53377200	53377800	MergedBins_1817	502	*	3.34982	43.926	3.71292	6.58888e-44	3.55108e-43
11	53385400	53385800	MergedBins_1818	366	*	1.11661	32.0257	4.84204	7.19801e-36	3.30646e-35
11	53387200	53387400	MergedBins_1819	269	*	1.30271	23.5381	4.17541	1.92919e-25	7.06992e-25
11	53409600	53409800	MergedBins_1820	27	*	1.86101	2.36256	0.344264	0.638426	0.668937
11	53410400	53410800	MergedBins_1821	98	*	11.3522	8.5752	-0.404723	0.100844	0.118731
11	54443200	54443600	MergedBins_1822	285	*	2.79151	24.9381	3.15923	2.32517e-23	8.04581e-23
11	54462800	54463600	MergedBins_1823	2064	*	2.04711	180.604	6.4631	6.47796e-207	5.00977e-205
11	54463800	54464200	MergedBins_1824	69	*	2.23321	6.03764	1.43487	0.00140581	0.00196838
11	54464400	54465000	MergedBins_1825	236	*	2.97761	20.6505	2.79395	4.85654e-18	1.42763e-17
11	54574000	54574200	MergedBins_1826	1	*	0.372202	0.087502	-2.0887	0.241421	0.26997
11	54575200	54575600	MergedBins_1827	300	*	2.60541	26.2506	3.33277	2.57731e-25	9.41458e-25
11	54582400	54582800	MergedBins_1828	1	*	0.744403	0.087502	-3.0887	0.0389242	0.0476054
11	54604200	54604400	MergedBins_1829	0	*	0.558303	0	-5.99559	0.0327109	0.0403208
11	54606200	54606600	MergedBins_1830	134	*	0.186101	11.7253	5.97739	2.12324e-21	6.94282e-21
11	54777400	54777800	MergedBins_1831	173	*	2.23321	15.1379	2.76097	1.89285e-13	4.69203e-13
11	54910000	54910400	MergedBins_1832	1	*	40.9422	0.087502	-8.87006	1.79508e-107	3.05705e-106
11	55014800	55015000	MergedBins_1833	0	*	5.58303	0	-9.31751	1.4025e-15	3.76949e-15
11	55394400	55396000	MergedBins_1834	1806	*	204.339	158.029	-0.370776	1.88064e-11	4.2915e-11
11	55404000	55404600	MergedBins_1835	111	*	5.02472	9.71273	0.950833	0.0023972	0.00330486
11	58985600	58986000	MergedBins_1836	13	*	1.11661	1.13753	0.0267814	0.834973	0.855894
11	58991000	58991200	MergedBins_1837	0	*	5.95523	0	-9.41062	1.43448e-16	4.00215e-16
11	59057200	59058200	MergedBins_1838	534	*	7.81624	46.7261	2.57968	9.81609e-37	4.62384e-36
11	59058400	59060400	MergedBins_1839	665	*	43.7337	58.1889	0.411998	0.000183838	0.000278097
11	59101200	59101400	MergedBins_1840	21	*	1.11661	1.83754	0.718659	0.378347	0.409933
11	59119400	59119800	MergedBins_1841	5	*	9.49114	0.43751	-4.43919	3.27174e-20	1.02843e-19
11	59120400	59121000	MergedBins_1842	892	*	35.3592	78.0518	1.14235	3.72529e-24	1.31898e-23
11	59212000	59212400	MergedBins_1843	20	*	55.6441	1.75004	-4.99077	5.30599e-123	1.23272e-121
11	59665600	59665800	MergedBins_1844	0	*	0.744403	0	-6.41062	0.0104614	0.0135226
11	59705000	59705400	MergedBins_1845	327	*	1.67491	28.6132	4.09453	2.14338e-30	8.78437e-30
11	59722400	59722600	MergedBins_1846	0	*	2.04711	0	-7.87006	3.57989e-06	6.07007e-06
11	59853800	59854000	MergedBins_1847	2	*	3.16371	0.175004	-4.17616	3.19266e-07	5.8539e-07
11	60111200	60111600	MergedBins_1848	53	*	10.0494	4.63761	-1.11566	6.43564e-05	0.000100602
11	60116000	60116400	MergedBins_1849	65	*	12.6549	5.68763	-1.15379	3.46214e-06	5.93548e-06
11	60117400	60117600	MergedBins_1850	3	*	1.67491	0.262506	-2.67366	0.00279533	0.003835
11	60119000	60119200	MergedBins_1851	0	*	2.23321	0	-7.99559	1.1449e-06	2.0145e-06
11	60124200	60124400	MergedBins_1852	37	*	2.41931	3.23758	0.420318	0.450115	0.483058
11	60127600	60127800	MergedBins_1853	144	*	7.81624	12.6003	0.688912	0.00757843	0.00997646
11	60134800	60135400	MergedBins_1854	13	*	9.30504	1.13753	-3.03211	2.2147e-15	5.92845e-15
11	60139000	60139200	MergedBins_1855	160	*	3.34982	14.0003	2.06331	6.59963e-10	1.40332e-09
11	60148200	60148400	MergedBins_1856	87	*	2.79151	7.61268	1.44736	0.000278304	0.000416423
11	60181800	60182200	MergedBins_1857	42	*	0.930504	3.67509	1.98169	0.000902405	0.00129434
11	60236600	60237200	MergedBins_1858	350	*	14.1437	30.6257	1.11459	5.43636e-10	1.16078e-09
11	60314600	60314800	MergedBins_1859	145	*	5.58303	12.6878	1.18432	3.66438e-05	5.79881e-05
11	60322000	60322400	MergedBins_1860	182	*	9.67724	15.9254	0.718659	0.00174365	0.00242876
11	60323200	60323400	MergedBins_1861	238	*	8.37454	20.8255	1.31427	9.67695e-09	1.9318e-08
11	60338400	60338600	MergedBins_1862	11	*	1.86101	0.962523	-0.951192	0.192741	0.21806
11	60419800	60420000	MergedBins_1863	24	*	1.11661	2.10005	0.911304	0.225775	0.253705
11	60874000	60874400	MergedBins_1864	78	*	2.60541	6.82516	1.38935	0.000850597	0.00122236
11	61488000	61488600	MergedBins_1865	101	*	25.1236	8.83771	-1.5073	1.75379e-16	4.88215e-16
11	62323200	62323600	MergedBins_1866	94	*	4.83862	8.22519	0.765453	0.0200842	0.0253857
11	62355800	62356000	MergedBins_1867	93	*	0.744403	8.13769	3.45046	1.7851e-11	4.07594e-11
11	62411800	62412200	MergedBins_1868	30	*	1.11661	2.62506	1.23323	0.0732171	0.0873976
11	62413200	62414200	MergedBins_1869	193	*	5.02472	16.8879	1.74887	5.81239e-10	1.23966e-09
11	62415200	62415400	MergedBins_1870	0	*	0.186101	0	-4.41062	0.319814	0.349765
11	63988000	63988400	MergedBins_1871	0	*	2.97761	0	-8.41062	1.19772e-08	2.37211e-08
11	64069000	64069400	MergedBins_1872	39	*	2.79151	3.41258	0.289816	0.60556	0.637043
11	65046400	65046600	MergedBins_1873	379	*	0.186101	33.1633	7.47736	7.59492e-62	5.74375e-61
11	65133600	65134000	MergedBins_1874	15	*	0.372202	1.31253	1.81819	0.11505	0.133343
11	65148200	65148600	MergedBins_1875	0	*	4.65252	0	-9.05448	4.19201e-13	1.02362e-12
11	65201400	65201800	MergedBins_1876	1058	*	18.6101	92.5772	2.31457	7.87355e-65	6.25178e-64
11	65207200	65207600	MergedBins_1877	53	*	1.30271	4.63761	1.83187	0.00121453	0.00170946
11	65208000	65208400	MergedBins_1878	166	*	2.04711	14.5253	2.82691	3.6112e-13	8.86586e-13
11	65210200	65210600	MergedBins_1879	108	*	5.21082	9.45022	0.858837	0.00583671	0.00775778
11	65211000	65211400	MergedBins_1880	479	*	2.04711	41.9135	4.35575	6.2347e-45	3.42893e-44
11	65211600	65211800	MergedBins_1881	63	*	1.11661	5.51263	2.30362	5.86632e-05	9.18167e-05
11	65212000	65213000	MergedBins_1882	379	*	7.44403	33.1633	2.15543	1.19553e-22	4.061e-22
11	65213400	65214200	MergedBins_1883	386	*	17.1213	33.7758	0.980199	3.20952e-09	6.59485e-09
11	65214600	65214800	MergedBins_1884	1	*	0.930504	0.087502	-3.41062	0.0147242	0.0188088
11	65216600	65217000	MergedBins_1885	1068	*	1.86101	93.4522	5.65007	1.2418e-105	2.04987e-104
11	65218000	65218200	MergedBins_1886	8	*	1.30271	0.700016	-0.896051	0.345857	0.37632
11	65230400	65230800	MergedBins_1887	30	*	8.74674	2.62506	-1.73639	9.0541e-08	1.71555e-07
11	65232800	65233200	MergedBins_1888	56	*	6.69963	4.90011	-0.451266	0.174323	0.198056
11	65234600	65235000	MergedBins_1889	77	*	5.58303	6.73766	0.2712	0.440657	0.473763
11	65235400	65236600	MergedBins_1890	36	*	4.09422	3.15007	-0.378202	0.406124	0.438138
11	65236800	65237400	MergedBins_1891	161	*	14.1437	14.0878	-0.00570649	0.967124	0.977513
11	65238200	65239000	MergedBins_1892	1498	*	14.8881	131.078	3.1382	5.21029e-116	1.04307e-114
11	65239200	65239800	MergedBins_1893	128	*	9.67724	11.2003	0.210864	0.418123	0.450308
11	65241000	65241600	MergedBins_1894	235	*	39.8256	20.563	-0.953646	1.51349e-12	3.6098e-12
11	65244000	65244600	MergedBins_1895	0	*	23.6348	0	-11.3993	1.32297e-63	1.03303e-62
11	65245000	65245400	MergedBins_1896	419	*	5.58303	36.6634	2.71522	2.52654e-30	1.03322e-29
11	65246000	65246600	MergedBins_1897	210	*	21.9599	18.3754	-0.257093	0.135753	0.155993
11	65246800	65247200	MergedBins_1898	107	*	4.83862	9.36272	0.952331	0.00287131	0.00393256
11	65247800	65250200	MergedBins_1899	2179	*	102.355	190.667	0.897467	6.04742e-40	3.02934e-39
11	65250400	65251400	MergedBins_1900	444	*	24.5653	38.8509	0.661326	3.83927e-06	6.48843e-06
11	65251600	65252800	MergedBins_1901	915	*	16.7491	80.0644	2.25708	5.51939e-55	3.73394e-54
11	65253200	65254400	MergedBins_1902	1182	*	35.7314	103.427	1.53336	2.7845e-46	1.56573e-45
11	65256600	65257400	MergedBins_1903	646	*	14.8881	56.5263	1.92477	1.51424e-33	6.63201e-33
11	65257800	65258200	MergedBins_1904	38	*	9.67724	3.32508	-1.54121	2.83517e-07	5.21197e-07
11	65259400	65259800	MergedBins_1905	187	*	9.30504	16.3629	0.814342	0.000426635	0.000625358
11	65260800	65261200	MergedBins_1906	38	*	67.3685	3.32508	-4.34061	2.23245e-138	6.75779e-137
11	65261600	65262000	MergedBins_1907	3	*	33.8704	0.262506	-7.01153	2.5585e-85	2.82662e-84
11	65262600	65262800	MergedBins_1908	0	*	3.90812	0	-8.80294	4.00716e-11	8.96648e-11
11	65264000	65264400	MergedBins_1909	0	*	18.0518	0	-11.0105	9.43639e-49	5.56087e-48
11	65267000	65267400	MergedBins_1910	119	*	2.79151	10.4127	1.89923	4.04782e-07	7.35026e-07
11	65355400	65355600	MergedBins_1911	121	*	3.90812	10.5877	1.43785	1.68738e-05	2.74448e-05
11	65358600	65358800	MergedBins_1912	355	*	2.41931	31.0632	3.68254	2.42455e-31	1.01279e-30
11	65694800	65695200	MergedBins_1913	1672	*	0.372202	146.303	8.61866	2.51178e-275	3.63596e-273
11	65759400	65759600	MergedBins_1914	12	*	3.72202	1.05002	-1.82566	0.000444771	0.000651266
11	65769400	65769600	MergedBins_1915	103	*	4.46642	9.01271	1.01284	0.00216776	0.0029988
11	68299000	68299400	MergedBins_1916	225	*	2.79151	19.688	2.81819	2.2965e-17	6.59958e-17
11	68309600	68309800	MergedBins_1917	0	*	0.186101	0	-4.41062	0.319814	0.349765
11	68326600	68327000	MergedBins_1918	0	*	2.97761	0	-8.41062	1.19772e-08	2.37211e-08
11	68335400	68335600	MergedBins_1919	284	*	2.97761	24.8506	3.06105	8.01322e-23	2.7318e-22
11	68337600	68337800	MergedBins_1920	30	*	1.48881	2.62506	0.818195	0.203893	0.230054
11	68341600	68342000	MergedBins_1921	0	*	2.60541	0	-8.21798	1.17101e-07	2.19159e-07
11	68344000	68344400	MergedBins_1922	0	*	2.41931	0	-8.11106	3.66154e-07	6.66814e-07
11	68346800	68347200	MergedBins_1923	126	*	5.95523	11.0253	0.888584	0.00210121	0.00290887
11	68347400	68347600	MergedBins_1924	59	*	1.86101	5.16262	1.47202	0.00282964	0.00387924
11	68368400	68368800	MergedBins_1925	244	*	2.79151	21.3505	2.93515	2.95465e-19	8.98007e-19
11	68369000	68369600	MergedBins_1926	21	*	2.23321	1.83754	-0.281341	0.723991	0.751548
11	68370000	68370400	MergedBins_1927	27	*	2.23321	2.36256	0.0812291	0.992535	0.998371
11	68382200	68382600	MergedBins_1928	13	*	7.25793	1.13753	-2.67366	7.90098e-11	1.75024e-10
11	68740800	68741400	MergedBins_1929	494	*	3.34982	43.226	3.68975	4.26149e-43	2.25899e-42
11	68777400	68777800	MergedBins_1930	2	*	4.46642	0.175004	-4.67366	2.04638e-10	4.45712e-10
11	68829200	68829400	MergedBins_1931	42	*	0.186101	3.67509	4.30362	1.77171e-06	3.08376e-06
11	69090800	69091600	MergedBins_1932	642	*	4.83862	56.1763	3.53729	2.37235e-54	1.58311e-53
11	69554000	69554400	MergedBins_1933	44	*	3.16371	3.85009	0.283273	0.581349	0.613746
11	69599800	69600600	MergedBins_1934	590	*	5.95523	51.6262	3.11588	1.96139e-46	1.10841e-45
11	69600800	69601600	MergedBins_1935	344	*	3.72202	30.1007	3.01564	4.34045e-27	1.66185e-26
11	69635000	69635400	MergedBins_1936	559	*	1.48881	48.9136	5.03801	1.3056e-54	8.76426e-54
11	69637000	69637200	MergedBins_1937	230	*	1.67491	20.1255	3.58687	1.64439e-20	5.20663e-20
11	69637400	69637600	MergedBins_1938	19	*	2.97761	1.66254	-0.840768	0.118586	0.137343
11	69780200	69780400	MergedBins_1939	0	*	0.186101	0	-4.41062	0.319814	0.349765
11	69919000	69919400	MergedBins_1940	609	*	3.34982	53.2887	3.99168	9.04146e-55	6.09839e-54
11	70659400	70659800	MergedBins_1941	60	*	5.58303	5.25012	-0.0886959	0.871317	0.890359
11	70660000	70660400	MergedBins_1942	217	*	4.83862	18.9879	1.97242	1.86501e-12	4.43323e-12
11	70701800	70702200	MergedBins_1943	124	*	4.46642	10.8503	1.28054	5.72099e-05	8.96291e-05
11	70849800	70850200	MergedBins_1944	1856	*	0.744403	162.404	7.76929	1.38684e-301	2.6998e-299
11	72185800	72186000	MergedBins_1945	0	*	2.23321	0	-7.99559	1.1449e-06	2.0145e-06
11	72620600	72620800	MergedBins_1946	0	*	2.60541	0	-8.21798	1.17101e-07	2.19159e-07
11	72625400	72625600	MergedBins_1947	453	*	4.46642	39.6384	3.14971	3.05005e-36	1.41779e-35
11	72644800	72645000	MergedBins_1948	0	*	15.6325	0	-10.8029	2.57752e-42	1.34735e-41
11	74679400	74679800	MergedBins_1949	16	*	26.7985	1.40003	-4.25862	3.30943e-55	2.2483e-54
11	74682200	74682400	MergedBins_1950	12	*	23.6348	1.05002	-4.49242	2.41824e-50	1.47193e-49
11	74683400	74683600	MergedBins_1951	3	*	10.9799	0.262506	-5.38638	7.49405e-26	2.77974e-25
11	75057600	75058000	MergedBins_1952	36	*	4.09422	3.15007	-0.378202	0.406124	0.438138
11	75058400	75058600	MergedBins_1953	18	*	0.558303	1.57504	1.49627	0.101589	0.119131
11	75091400	75091600	MergedBins_1954	104	*	4.46642	9.10021	1.02678	0.00184046	0.00256075
11	75331400	75331800	MergedBins_1955	0	*	9.49114	0	-10.083	5.61959e-26	2.09064e-25
11	75338400	75338800	MergedBins_1956	0	*	2.41931	0	-8.11106	3.66154e-07	6.66814e-07
11	75751800	75752000	MergedBins_1957	14	*	40.57	1.22503	-5.04953	1.72009e-90	2.1019e-89
11	75756800	75757000	MergedBins_1958	8	*	24.007	0.700016	-5.09992	2.84587e-54	1.89462e-53
11	75759200	75759400	MergedBins_1959	324	*	33.4982	28.3507	-0.240699	0.0802804	0.0955561
11	75764600	75764800	MergedBins_1960	526	*	22.5182	46.0261	1.03136	6.00726e-13	1.45898e-12
11	76134800	76135000	MergedBins_1961	0	*	0.372202	0	-5.41062	0.102281	0.119131
11	76386600	76387000	MergedBins_1962	193	*	10.6077	16.8879	0.670871	0.00232856	0.00321123
11	76779800	76780200	MergedBins_1963	106	*	8.18844	9.27522	0.179793	0.543296	0.57605
11	76820000	76820200	MergedBins_1964	187	*	2.97761	16.3629	2.4582	3.17398e-13	7.81111e-13
11	77220800	77221200	MergedBins_1965	320	*	1.86101	28.0007	3.9113	3.3569e-29	1.33507e-28
11	77262400	77263000	MergedBins_1966	211	*	2.41931	18.4629	2.93196	8.17116e-17	2.30019e-16
11	77263400	77263600	MergedBins_1967	40	*	0.558303	3.50008	2.64827	0.000208414	0.000314684
11	77264800	77265000	MergedBins_1968	13	*	1.86101	1.13753	-0.710184	0.337741	0.368092
11	77266200	77266600	MergedBins_1969	1096	*	1.67491	95.9022	5.83941	5.15346e-109	9.00739e-108
11	77267200	77267800	MergedBins_1970	124	*	0.930504	10.8503	3.54357	2.50878e-15	6.70611e-15
11	77368000	77368200	MergedBins_1971	0	*	1.48881	0	-7.41062	0.000109441	0.000167597
11	77383400	77383600	MergedBins_1972	543	*	1.11661	47.5136	5.41115	5.36521e-54	3.53654e-53
11	77504800	77505200	MergedBins_1973	771	*	3.72202	67.4641	4.17996	2.7976e-70	2.45819e-69
11	77533200	77533400	MergedBins_1974	1234	*	0.930504	107.978	6.8585	4.28984e-196	2.93555e-194
11	77803200	77803800	MergedBins_1975	193	*	3.16371	16.8879	2.4163	2.01797e-13	4.99779e-13
11	77805600	77806000	MergedBins_1976	198	*	10.6077	17.3254	0.707771	0.00124016	0.00174401
11	77806200	77806600	MergedBins_1977	0	*	18.2379	0	-11.0253	3.01785e-49	1.79151e-48
11	77807000	77807200	MergedBins_1978	76	*	3.53592	6.65016	0.911304	0.0166721	0.0211868
11	77834000	77834400	MergedBins_1979	52	*	1.30271	4.55011	1.80439	0.00150624	0.00210639
11	77835600	77836000	MergedBins_1980	114	*	0.372202	9.97523	4.74419	7.41628e-17	2.09186e-16
11	77837400	77837800	MergedBins_1981	48	*	13.2132	4.2001	-1.65348	1.81312e-10	3.95976e-10
11	78108000	78108400	MergedBins_1982	220	*	3.53592	19.2505	2.44474	2.87242e-15	7.66183e-15
11	78108800	78109200	MergedBins_1983	409	*	6.14133	35.7883	2.54287	3.8311e-28	1.49419e-27
11	78111200	78111600	MergedBins_1984	0	*	2.79151	0	-8.31751	3.74505e-08	7.20241e-08
11	78114400	78114600	MergedBins_1985	0	*	4.46642	0	-8.99559	1.31077e-12	3.1349e-12
11	78125400	78125800	MergedBins_1986	1102	*	1.30271	96.4273	6.20986	1.1328e-110	2.02701e-109
11	78143800	78144000	MergedBins_1987	1398	*	0.186101	122.328	9.36045	9.12458e-232	9.19872e-230
11	78582200	78582400	MergedBins_1988	575	*	5.39692	50.3137	3.22074	2.96949e-46	1.66726e-45
11	78662600	78662800	MergedBins_1989	123	*	0.930504	10.7628	3.53189	4.04893e-15	1.07568e-14
11	78664400	78664600	MergedBins_1990	573	*	2.79151	50.1387	4.1668	1.47589e-52	9.41484e-52
11	78667800	78668000	MergedBins_1991	2	*	0.372202	0.175004	-1.0887	0.597431	0.628725
11	78685600	78686000	MergedBins_1992	113	*	3.16371	9.88773	1.64402	5.97146e-06	9.99462e-06
11	79145000	79145200	MergedBins_1993	536	*	4.83862	46.9011	3.27695	1.12028e-43	6.01476e-43
11	79479600	79480000	MergedBins_1994	13	*	1.48881	1.13753	-0.388256	0.713792	0.742325
11	79482200	79482400	MergedBins_1995	0	*	0.372202	0	-5.41062	0.102281	0.119131
11	79516400	79516600	MergedBins_1996	532	*	2.04711	46.5511	4.50715	2.42167e-50	1.47243e-49
11	80260200	80260600	MergedBins_1997	220	*	4.09422	19.2505	2.23323	3.84928e-14	9.86208e-14
11	80261400	80262000	MergedBins_1998	751	*	4.65252	65.714	3.82012	7.57433e-66	6.13059e-65
11	80262400	80263200	MergedBins_1999	415	*	5.76913	36.3133	2.65408	1.58748e-29	6.37874e-29
[truncated: 9,292 more rows]

## Sheet: Matr3_Ip1_enrichment_over_input
chr	start	end	id_region	score	strand	FPM_Input	FPM_Ip1	log2FoldEnrichment	PValue	FDR
1	6205600	6206000	MergedBins_1	58	*	5.02472	3.46003	-0.538257	0.13775	0.152514
1	7111400	7111800	MergedBins_2	151	*	0.372202	9.00802	4.59705	9.15381e-16	3.67814e-15
1	9736600	9737000	MergedBins_3	237	*	2.60541	14.1384	2.44004	8.18503e-12	2.15124e-11
1	10164800	10165200	MergedBins_4	255	*	4.46642	15.2122	1.76804	1.58048e-09	3.24459e-09
1	10177800	10178000	MergedBins_5	128	*	0.930504	7.63594	3.03672	1.81139e-10	4.09047e-10
1	10225600	10225800	MergedBins_6	162	*	0.186101	9.66424	5.6985	1.54363e-18	8.08774e-18
1	11115000	11115400	MergedBins_7	6	*	1.86101	0.357935	-2.37832	0.00105749	0.00134887
1	13255200	13255400	MergedBins_8	119	*	6.51353	7.09904	0.124184	0.723479	0.743294
1	13279200	13279400	MergedBins_9	137	*	1.67491	8.17284	2.28676	5.51826e-07	9.12516e-07
1	13280600	13281000	MergedBins_10	168	*	10.4216	10.0222	-0.0563884	0.860766	0.874632
1	13337200	13337600	MergedBins_11	153	*	1.48881	9.12733	2.61604	1.89271e-08	3.56355e-08
1	13342600	13343000	MergedBins_12	196	*	1.48881	11.6925	2.97336	2.10437e-11	5.26257e-11
1	13360800	13361400	MergedBins_13	269	*	1.11661	16.0474	3.84515	2.35462e-17	1.10407e-16
1	13361600	13362400	MergedBins_14	561	*	4.83862	33.4669	2.79007	5.9544e-29	6.43976e-28
1	16332600	16333200	MergedBins_15	344	*	4.65252	20.5216	2.14106	7.26701e-15	2.68143e-14
1	16417000	16417200	MergedBins_16	8	*	0.186101	0.477246	1.35865	0.6971	0.71776
1	16590200	16590400	MergedBins_17	163	*	9.30504	9.72389	0.0635211	0.847375	0.861661
1	21000600	21000800	MergedBins_18	54	*	1.86101	3.22141	0.791609	0.142069	0.157034
1	21652400	21652600	MergedBins_19	127	*	2.23321	7.57628	1.76237	2.64293e-05	3.77404e-05
1	21726800	21727000	MergedBins_20	123	*	0.558303	7.33766	3.7162	1.0144e-11	2.63181e-11
1	21728200	21728600	MergedBins_21	167	*	2.79151	9.96251	1.83546	7.1086e-07	1.16256e-06
1	21771800	21772200	MergedBins_22	392	*	2.97761	23.3851	2.97336	1.55746e-21	1.03376e-20
1	21772600	21772800	MergedBins_23	63	*	0.744403	3.75831	2.33593	0.000152275	0.000206205
1	21779600	21779800	MergedBins_24	148	*	0.744403	8.82905	3.5681	1.63109e-13	5.17321e-13
1	21841000	21841400	MergedBins_25	45	*	2.41931	2.68451	0.150063	0.859226	0.873146
1	21859000	21859400	MergedBins_26	223	*	0.930504	13.3032	3.83762	7.99806e-21	5.04222e-20
1	21888400	21888800	MergedBins_27	78	*	0.372202	4.65315	3.64405	1.28948e-07	2.26749e-07
1	21897800	21898000	MergedBins_28	123	*	8.74674	7.33766	-0.253425	0.349151	0.372439
1	21911000	21911200	MergedBins_29	131	*	4.28032	7.81491	0.86851	0.00907457	0.0108804
1	21912400	21912600	MergedBins_30	176	*	0.186101	10.4994	5.81808	3.80286e-20	2.26586e-19
1	21915200	21915600	MergedBins_31	220	*	6.32743	13.1243	1.05255	7.05637e-05	9.7879e-05
1	21918800	21919200	MergedBins_32	214	*	2.41931	12.7663	2.39968	1.19123e-10	2.74998e-10
1	21934400	21934800	MergedBins_33	289	*	3.53592	17.2405	2.28565	2.0601e-13	6.46127e-13
1	21941800	21942000	MergedBins_34	135	*	0.930504	8.05353	3.11354	3.34192e-11	8.17629e-11
1	23260400	23260600	MergedBins_35	166	*	5.58303	9.90286	0.826798	0.00443881	0.00544058
1	23916400	23916800	MergedBins_36	174	*	8.18844	10.3801	0.342161	0.183581	0.200951
1	24615800	24616000	MergedBins_37	139	*	5.39692	8.29215	0.619609	0.0423572	0.0486675
1	30849600	30850200	MergedBins_38	332	*	1.67491	19.8057	3.56376	2.13669e-20	1.29846e-19
1	30853200	30853400	MergedBins_39	124	*	1.67491	7.39732	2.14292	4.06266e-06	6.19969e-06
1	33596200	33596400	MergedBins_40	127	*	1.11661	7.57628	2.76237	1.83927e-07	3.18614e-07
1	33795000	33795400	MergedBins_41	47	*	5.76913	2.80382	-1.04096	0.00225425	0.00281307
1	34132000	34132400	MergedBins_42	173	*	2.97761	10.3204	1.79328	6.21829e-07	1.02363e-06
1	34141400	34141600	MergedBins_43	142	*	7.25793	8.47112	0.222994	0.441804	0.465727
1	34144800	34145200	MergedBins_44	226	*	1.11661	13.4822	3.59387	2.37608e-14	8.28801e-14
1	34146200	34146600	MergedBins_45	287	*	0.558303	17.1212	4.93859	2.77475e-30	3.22323e-29
1	34161000	34161200	MergedBins_46	194	*	56.0164	11.5732	-2.27506	1.01419e-79	4.61745e-78
1	34163000	34163200	MergedBins_47	178	*	48.5723	10.6187	-2.19352	7.9603e-66	2.72363e-64
1	34828200	34828400	MergedBins_48	128	*	1.67491	7.63594	2.18872	2.20281e-06	3.44439e-06
1	34954800	34955000	MergedBins_49	0	*	0	0	0	1	1
1	36148400	36148600	MergedBins_50	17	*	0.744403	1.01415	0.446112	0.799475	0.81632
1	36337800	36338200	MergedBins_51	212	*	1.86101	12.647	2.76464	1.10438e-11	2.84694e-11
1	36338600	36339000	MergedBins_52	249	*	1.11661	14.8543	3.73369	5.8805e-16	2.4022e-15
1	36339400	36339800	MergedBins_53	344	*	3.72202	20.5216	2.46299	1.07786e-16	4.74654e-16
1	36441200	36441400	MergedBins_54	174	*	1.86101	10.3801	2.47966	4.23939e-09	8.40951e-09
1	36844000	36844200	MergedBins_55	126	*	1.30271	7.51663	2.52857	5.36875e-07	8.89095e-07
1	36845800	36846000	MergedBins_56	175	*	5.21082	10.4398	1.00251	0.000670769	0.000868439
1	36924200	36924600	MergedBins_57	194	*	2.41931	11.5732	2.25812	2.56347e-09	5.15937e-09
1	38094200	38094400	MergedBins_58	145	*	1.86101	8.65009	2.21663	3.73966e-07	6.2806e-07
1	39264400	39264600	MergedBins_59	130	*	0.930504	7.75525	3.05909	1.20159e-10	2.76485e-10
1	39902200	39902600	MergedBins_60	263	*	9.67724	15.6895	0.697128	0.0016366	0.00206076
1	39904200	39904400	MergedBins_61	134	*	29.7761	7.99387	-1.89719	4.06869e-33	5.36051e-32
1	39908200	39908800	MergedBins_62	225	*	4.65252	13.4225	1.52857	2.09786e-07	3.61578e-07
1	39910600	39911200	MergedBins_63	396	*	10.6077	23.6237	1.15512	8.96419e-09	1.7364e-08
1	39913800	39914000	MergedBins_64	136	*	2.79151	8.11319	1.53922	5.93766e-05	8.27681e-05
1	39915400	39915800	MergedBins_65	218	*	2.79151	13.005	2.21994	3.52052e-10	7.71997e-10
1	39918000	39918200	MergedBins_66	159	*	2.60541	9.48527	1.86418	1.08462e-06	1.74301e-06
1	39927000	39927600	MergedBins_67	508	*	4.28032	30.3051	2.82377	1.4343e-26	1.35293e-25
1	39932600	39932800	MergedBins_68	144	*	1.11661	8.59043	2.94361	1.22379e-08	2.34161e-08
1	40829800	40830000	MergedBins_69	126	*	8.18844	7.51663	-0.123503	0.689472	0.710554
1	43124200	43124400	MergedBins_70	129	*	2.60541	7.69559	1.56252	8.06914e-05	0.000111461
1	43128800	43130000	MergedBins_71	3426	*	15.8186	204.381	3.69157	3.73693e-200	5.34097e-198
1	43130400	43131000	MergedBins_72	444	*	9.86334	26.4872	1.42514	2.14348e-12	5.98319e-12
1	43131200	43131800	MergedBins_73	343	*	5.58303	20.4619	1.87382	4.12668e-13	1.25085e-12
1	43142200	43142400	MergedBins_74	143	*	2.04711	8.53078	2.05909	1.14659e-06	1.8379e-06
1	43144200	43144800	MergedBins_75	213	*	8.74674	12.7067	0.53877	0.0239164	0.0279313
1	43145000	43145600	MergedBins_76	475	*	14.1437	28.3365	1.00251	1.27924e-08	2.44522e-08
1	43146200	43146600	MergedBins_77	249	*	6.51353	14.8543	1.18937	3.69031e-06	5.65593e-06
1	43151400	43151800	MergedBins_78	218	*	3.53592	13.005	1.87891	8.3202e-09	1.61637e-08
1	43154400	43154800	MergedBins_79	204	*	11.9105	12.1698	0.0310745	0.93695	0.947439
1	43155800	43158800	MergedBins_80	3307	*	46.153	197.282	2.09576	1.10001e-127	9.33846e-126
1	43160200	43160600	MergedBins_81	241	*	10.6077	14.377	0.438648	0.0449896	0.0516028
1	43160800	43162800	MergedBins_82	1270	*	48.3862	75.7628	0.646894	3.76747e-11	9.16976e-11
1	43167000	43167800	MergedBins_83	331	*	12.2827	19.7461	0.684942	0.000471376	0.000615937
1	43170200	43170600	MergedBins_84	268	*	9.11894	15.9877	0.810028	0.000323198	0.000427411
1	43170800	43171200	MergedBins_85	259	*	34.4287	15.4508	-1.15592	2.02175e-17	9.54731e-17
1	43171400	43171800	MergedBins_86	224	*	27.9151	13.3629	-1.06281	1.42786e-12	4.06401e-12
1	43172200	43172400	MergedBins_87	119	*	2.60541	7.09904	1.44611	0.000322008	0.000425936
1	43172800	43173200	MergedBins_88	223	*	6.69963	13.3032	0.989624	0.000132443	0.000180365
1	43173600	43174000	MergedBins_89	244	*	5.02472	14.556	1.5345	5.82226e-08	1.05554e-07
1	43174800	43176000	MergedBins_90	1329	*	17.6796	79.2825	2.16492	6.16883e-54	1.57228e-52
1	43176200	43177800	MergedBins_91	1122	*	17.3074	66.9338	1.95135	2.07748e-41	3.64237e-40
1	43178000	43179000	MergedBins_92	599	*	11.1661	35.7338	1.67817	1.60206e-19	9.12656e-19
1	43180600	43181000	MergedBins_93	213	*	6.69963	12.7067	0.923434	0.000401558	0.000527945
1	43181200	43181800	MergedBins_94	494	*	16.563	29.47	0.831283	5.03278e-07	8.36401e-07
1	43183600	43184200	MergedBins_95	696	*	36.4758	41.5204	0.186883	0.117808	0.131142
1	43186000	43186400	MergedBins_96	416	*	26.2402	24.8168	-0.0804625	0.600975	0.623792
1	43187600	43188000	MergedBins_97	192	*	14.1437	11.4539	-0.304316	0.136718	0.151415
1	43188400	43189200	MergedBins_98	696	*	8.18844	41.5204	2.34216	4.83066e-31	5.83348e-30
1	43189600	43190400	MergedBins_99	969	*	15.0742	57.8064	1.93915	9.57768e-36	1.40626e-34
1	43191800	43192000	MergedBins_100	121	*	5.95523	7.21835	0.277512	0.381634	0.405289
1	43192800	43193800	MergedBins_101	950	*	9.11894	56.673	2.63572	4.98104e-46	1.03194e-44
1	43195400	43196600	MergedBins_102	1757	*	81.3261	104.815	0.366058	2.19387e-06	3.43374e-06
1	43197400	43197600	MergedBins_103	167	*	0.744403	9.96251	3.74235	1.31054e-15	5.20116e-15
1	43198800	43199000	MergedBins_104	124	*	2.23321	7.39732	1.72788	4.0839e-05	5.75312e-05
1	43453000	43453600	MergedBins_105	318	*	2.23321	18.9705	3.08657	3.94932e-18	1.98539e-17
1	43454200	43454400	MergedBins_106	132	*	6.14133	7.87456	0.358649	0.234117	0.254322
1	43457800	43458400	MergedBins_107	402	*	2.60541	23.9816	3.20235	4.61314e-23	3.42452e-22
1	43463400	43463600	MergedBins_108	132	*	1.86101	7.87456	2.08112	2.71063e-06	4.20524e-06
1	43519800	43520000	MergedBins_109	97	*	2.41931	5.78661	1.25812	0.0033258	0.00410534
1	43965200	43965400	MergedBins_110	125	*	1.86101	7.45697	2.00251	7.79989e-06	1.16416e-05
1	43989400	43989600	MergedBins_111	143	*	1.30271	8.53078	2.71117	3.6721e-08	6.75052e-08
1	44577800	44578000	MergedBins_112	119	*	0.744403	7.09904	3.25347	2.58856e-10	5.76023e-10
1	44663800	44664200	MergedBins_113	63	*	1.11661	3.75831	1.75097	0.00400341	0.00492187
1	45316400	45316800	MergedBins_114	3	*	0.744403	0.178967	-2.05639	0.0640535	0.0726278
1	45322400	45322600	MergedBins_115	132	*	26.9846	7.87456	-1.77687	2.55389e-27	2.50313e-26
1	45345800	45346200	MergedBins_116	198	*	24.1931	11.8118	-1.03436	1.32821e-10	3.04503e-10
1	45347000	45347400	MergedBins_117	197	*	35.1731	11.7522	-1.58154	2.1994e-29	2.43226e-28
1	45347600	45348000	MergedBins_118	346	*	63.4604	20.6409	-1.62035	6.41763e-54	1.63201e-52
1	45348600	45349200	MergedBins_119	392	*	67.3685	23.3851	-1.52649	6.51972e-52	1.5696e-50
1	45495200	45495600	MergedBins_120	253	*	1.48881	15.0929	3.34164	2.37995e-15	9.23121e-15
1	45495800	45496000	MergedBins_121	141	*	0.372202	8.41146	4.4982	8.14877e-15	2.99018e-14
1	51831200	51831800	MergedBins_122	530	*	4.09422	31.6176	2.94907	1.78127e-28	1.87791e-27
1	52203400	52203600	MergedBins_123	32	*	7.44403	1.90898	-1.96328	1.41745e-09	2.93766e-09
1	53884000	53884400	MergedBins_124	54	*	0.372202	3.22141	3.11354	5.82948e-05	8.13103e-05
1	54180000	54180400	MergedBins_125	166	*	0.744403	9.90286	3.73369	2.08525e-15	8.13285e-15
1	54183000	54183200	MergedBins_126	54	*	1.11661	3.22141	1.52857	0.0151674	0.0179438
1	54402200	54402400	MergedBins_127	123	*	4.09422	7.33766	0.841732	0.0139124	0.0165126
1	55003000	55003400	MergedBins_128	46	*	9.11894	2.74417	-1.7325	1.14571e-09	2.39161e-09
1	55472000	55472200	MergedBins_129	15	*	0.186101	0.894837	2.26554	0.141024	0.155956
1	55472400	55472600	MergedBins_130	171	*	0.186101	10.2011	5.7765	1.53032e-19	8.72228e-19
1	55559600	55560000	MergedBins_131	12	*	1.67491	0.715869	-1.22631	0.0833221	0.0937789
1	55593200	55593600	MergedBins_132	235	*	3.90812	14.0191	1.84285	3.12891e-09	6.26392e-09
1	57355200	57355600	MergedBins_133	130	*	0	7.75525	8.70295	3.07802e-16	1.29727e-15
1	57855600	57855800	MergedBins_134	119	*	0.744403	7.09904	3.25347	2.58856e-10	5.76023e-10
1	58714200	58714600	MergedBins_135	293	*	2.23321	17.4791	2.96844	2.06078e-16	8.85396e-16
1	58929200	58929600	MergedBins_136	159	*	7.81624	9.48527	0.279215	0.300651	0.322808
1	58945600	58945800	MergedBins_137	125	*	1.48881	7.45697	2.32443	1.50631e-06	2.38538e-06
1	59663600	59663800	MergedBins_138	51	*	0.744403	3.04244	2.03107	0.00233167	0.00290873
1	59871200	59872200	MergedBins_139	738	*	14.1437	44.026	1.6382	4.17736e-23	3.10867e-22
1	59872400	59873200	MergedBins_140	788	*	43.9198	47.0087	0.0980579	0.379014	0.402772
1	59873400	59874800	MergedBins_141	878	*	32.3815	52.3778	0.693783	6.05209e-09	1.18739e-08
1	59875000	59875400	MergedBins_142	222	*	5.58303	13.2436	1.24617	6.59056e-06	9.88759e-06
1	59964600	59964800	MergedBins_143	127	*	2.23321	7.57628	1.76237	2.64293e-05	3.77404e-05
1	60110200	60110600	MergedBins_144	22	*	0.372202	1.31243	1.81808	0.0924338	0.103477
1	60186800	60187000	MergedBins_145	120	*	0.186101	7.15869	5.26554	1.59518e-13	5.06359e-13
1	60262400	60262800	MergedBins_146	263	*	0.744403	15.6895	4.39757	1.84593e-26	1.7311e-25
1	60490400	60490600	MergedBins_147	109	*	2.04711	6.50248	1.6674	0.000174313	0.000235146
1	60509000	60509600	MergedBins_148	263	*	2.97761	15.6895	2.39757	8.48768e-13	2.47378e-12
1	60521800	60522000	MergedBins_149	175	*	10.2355	10.4398	0.0285005	0.959405	0.968324
1	60536600	60536800	MergedBins_150	157	*	1.67491	9.36596	2.48334	2.47654e-08	4.61886e-08
1	60537800	60538200	MergedBins_151	255	*	4.09422	15.2122	1.89357	3.61213e-10	7.91165e-10
1	60539400	60539600	MergedBins_152	156	*	0.186101	9.3063	5.64405	1.00373e-17	4.86193e-17
1	60542000	60542200	MergedBins_153	131	*	3.72202	7.81491	1.07014	0.00216778	0.00270787
1	60542800	60543200	MergedBins_154	428	*	15.4464	25.5327	0.725077	2.87506e-05	4.09981e-05
1	60546600	60546800	MergedBins_155	137	*	2.79151	8.17284	1.54979	5.16642e-05	7.23479e-05
1	61719000	61719200	MergedBins_156	0	*	0.372202	0	-5.96328	0.0589243	0.0670477
1	61844600	61845000	MergedBins_157	178	*	1.48881	10.6187	2.83438	3.65776e-10	8.00539e-10
1	61868400	61868600	MergedBins_158	119	*	1.86101	7.09904	1.93154	1.91744e-05	2.77526e-05
1	61869600	61870000	MergedBins_159	226	*	3.34982	13.4822	2.0089	1.18967e-09	2.48063e-09
1	62308600	62308800	MergedBins_160	5	*	0.558303	0.298279	-0.904385	0.411599	0.43535
1	62748600	62748800	MergedBins_161	4	*	0.186101	0.238623	0.358649	1	1
1	63160800	63161200	MergedBins_162	156	*	37.9646	9.3063	-2.02837	3.19312e-46	6.69471e-45
1	63163600	63164000	MergedBins_163	210	*	54.7136	12.5277	-2.12678	9.67687e-71	3.75469e-69
1	64075800	64076000	MergedBins_164	163	*	1.11661	9.72389	3.12241	5.86125e-10	1.25792e-09
1	64103000	64103200	MergedBins_165	121	*	12.0966	7.21835	-0.744855	0.000935569	0.00119808
1	64113000	64113400	MergedBins_166	258	*	1.86101	15.3912	3.04795	7.67834e-15	2.82398e-14
1	64119200	64119400	MergedBins_167	130	*	0.930504	7.75525	3.05909	1.20159e-10	2.76485e-10
1	64531400	64531800	MergedBins_168	194	*	1.30271	11.5732	3.15121	1.09744e-11	2.83099e-11
1	64704400	64704800	MergedBins_169	282	*	2.79151	16.8229	2.59131	1.86522e-14	6.57925e-14
1	66799600	66800000	MergedBins_170	229	*	0.372202	13.6612	5.19785	6.47781e-25	5.47462e-24
1	66833400	66833600	MergedBins_171	176	*	0.930504	10.4994	3.49615	1.11311e-15	4.43946e-15
1	66835000	66835200	MergedBins_172	126	*	0.372202	7.51663	4.33593	4.73498e-13	1.41924e-12
1	66835600	66836000	MergedBins_173	197	*	1.30271	11.7522	3.17335	6.79535e-12	1.80363e-11
1	68170000	68170200	MergedBins_174	266	*	0.186101	15.8684	6.41393	7.95975e-31	9.50037e-30
1	68183800	68184200	MergedBins_175	69	*	1.48881	4.11625	1.46717	0.00675142	0.00816783
1	68481200	68481600	MergedBins_176	228	*	3.16371	13.6015	2.10408	3.99072e-10	8.70373e-10
1	68521600	68522000	MergedBins_177	214	*	2.41931	12.7663	2.39968	1.19123e-10	2.74998e-10
1	68670000	68670200	MergedBins_178	133	*	0.372202	7.93422	4.41393	7.80003e-14	2.56989e-13
1	68700200	68700600	MergedBins_179	324	*	1.11661	19.3285	4.11354	3.36842e-21	2.18705e-20
1	68714400	68714600	MergedBins_180	130	*	6.14133	7.75525	0.336623	0.267687	0.289037
1	68718400	68718600	MergedBins_181	172	*	4.28032	10.2608	1.26135	6.85958e-05	9.52546e-05
1	68723400	68723600	MergedBins_182	146	*	5.58303	8.70974	0.641583	0.0316402	0.0366109
1	68778600	68778800	MergedBins_183	124	*	0.930504	7.39732	2.99092	4.19112e-10	9.11614e-10
1	68833200	68833400	MergedBins_184	182	*	1.30271	10.8574	3.05909	7.45338e-11	1.75381e-10
1	68834600	68835200	MergedBins_185	24	*	0.744403	1.43174	0.943612	0.273901	0.295323
1	68847200	68847800	MergedBins_186	360	*	3.90812	21.4761	2.45818	2.20776e-17	1.03953e-16
1	68895800	68896600	MergedBins_187	1020	*	5.02472	60.8489	3.59812	5.28681e-60	1.57088e-58
1	68897200	68897800	MergedBins_188	669	*	2.41931	39.9097	4.04407	5.24326e-42	9.3822e-41
1	68909200	68909400	MergedBins_189	149	*	1.48881	8.88871	2.57782	3.54882e-08	6.53346e-08
1	68909800	68910000	MergedBins_190	126	*	2.04711	7.51663	1.8765	1.45545e-05	2.12677e-05
1	68921600	68922000	MergedBins_191	199	*	1.30271	11.8715	3.18792	4.93623e-12	1.32608e-11
1	68922800	68923200	MergedBins_192	182	*	5.58303	10.8574	0.959553	0.000785474	0.00101069
1	68944800	68945400	MergedBins_193	354	*	2.23321	21.1181	3.24129	1.30612e-20	8.08079e-20
1	68945600	68946400	MergedBins_194	410	*	4.28032	24.4589	2.51457	5.83272e-20	3.43902e-19
1	68948600	68949200	MergedBins_195	420	*	5.02472	25.0554	2.31801	4.01202e-19	2.19044e-18
1	68949400	68949800	MergedBins_196	252	*	4.46642	15.0333	1.75097	2.42536e-09	4.89976e-09
1	68982600	68982800	MergedBins_197	138	*	3.90812	8.2325	1.07486	0.00156513	0.00197252
1	68990800	68991800	MergedBins_198	947	*	6.69963	56.494	3.07594	4.24884e-51	1.00574e-49
1	68992400	68992600	MergedBins_199	158	*	1.86101	9.42561	2.3405	5.06415e-08	9.2091e-08
1	69003000	69003400	MergedBins_200	178	*	28.4734	10.6187	-1.42301	2.24471e-20	1.3619e-19
1	69011000	69011400	MergedBins_201	212	*	5.58303	12.647	1.17968	2.28845e-05	3.28279e-05
1	69025400	69025600	MergedBins_202	130	*	6.51353	7.75525	0.251734	0.408428	0.432361
1	69029800	69030200	MergedBins_203	203	*	2.60541	12.1101	2.21663	1.49885e-09	3.09106e-09
1	69032800	69034800	MergedBins_204	1433	*	12.2827	85.4867	2.79908	8.99169e-72	3.57483e-70
1	69047000	69047200	MergedBins_205	156	*	3.53592	9.3063	1.39612	5.08433e-05	7.12248e-05
1	69049000	69049400	MergedBins_206	283	*	8.93284	16.8826	0.918345	4.44628e-05	6.25037e-05
1	69051000	69051200	MergedBins_207	174	*	34.2426	10.3801	-1.72197	1.0768e-32	1.38791e-31
1	69053600	69054000	MergedBins_208	182	*	2.04711	10.8574	2.40701	2.94088e-09	5.89586e-09
1	69055000	69055800	MergedBins_209	609	*	8.18844	36.3304	2.14952	2.31688e-25	2.02319e-24
1	69070400	69071200	MergedBins_210	437	*	4.83862	26.0696	2.4297	1.27509e-20	7.90178e-20
1	69080400	69080800	MergedBins_211	261	*	3.72202	15.5702	2.06463	3.16833e-11	7.77518e-11
1	69091200	69091600	MergedBins_212	68	*	0.558303	4.05659	2.86115	1.01423e-05	1.50127e-05
1	69100000	69100800	MergedBins_213	625	*	4.09422	37.2849	3.18693	5.62677e-35	8.03184e-34
1	69103800	69104000	MergedBins_214	125	*	6.51353	7.45697	0.19515	0.538107	0.561895
1	69664600	69664800	MergedBins_215	126	*	1.48881	7.51663	2.33593	1.28977e-06	2.05689e-06
1	71586800	71587000	MergedBins_216	195	*	15.4464	11.6329	-0.40906	0.0356611	0.0411244
1	71590000	71590400	MergedBins_217	234	*	19.3545	13.9595	-0.471426	0.00649561	0.00787099
1	71590600	71591000	MergedBins_218	215	*	15.0742	12.826	-0.233008	0.241036	0.26151
1	71597600	71597800	MergedBins_219	121	*	16.0047	7.21835	-1.14875	1.09782e-08	2.11052e-08
1	71598400	71598600	MergedBins_220	129	*	18.2379	7.69559	-1.24483	5.2578e-11	1.25695e-10
1	71599200	71599400	MergedBins_221	128	*	12.841	7.63594	-0.749875	0.000589304	0.000765689
1	71602400	71602600	MergedBins_222	120	*	7.44403	7.15869	-0.0563884	0.90298	0.915549
1	71610800	71611000	MergedBins_223	133	*	7.44403	7.93422	0.0920035	0.790981	0.808159
1	71612400	71612600	MergedBins_224	152	*	14.3298	9.06768	-0.66021	0.0012679	0.00160671
1	71615400	71615600	MergedBins_225	140	*	16.0047	8.35181	-0.938333	1.9962e-06	3.13347e-06
1	71619400	71619600	MergedBins_226	129	*	8.74674	7.69559	-0.184712	0.506642	0.53056
1	72858000	72859800	MergedBins_227	1437	*	99.75	85.7253	-0.218596	0.00297331	0.0036803
1	72860000	72860600	MergedBins_228	930	*	27.5429	55.4799	1.01028	8.97131e-16	3.61639e-15
1	72861800	72862000	MergedBins_229	132	*	7.07183	7.87456	0.155116	0.620692	0.64293
1	72873800	72874000	MergedBins_230	123	*	2.79151	7.33766	1.39427	0.000352119	0.00046446
1	73910400	73910600	MergedBins_231	123	*	16.1908	7.33766	-1.14178	1.08004e-08	2.07854e-08
1	73913000	73913200	MergedBins_232	120	*	13.7715	7.15869	-0.943914	9.77026e-06	1.44734e-05
1	73932400	73932800	MergedBins_233	181	*	11.3522	10.7977	-0.0722423	0.792318	0.809379
1	73939400	73939600	MergedBins_234	160	*	6.32743	9.54492	0.593114	0.0349735	0.040348
1	73940000	73940400	MergedBins_235	183	*	14.5159	10.917	-0.411053	0.0411499	0.047314
1	73944000	73944400	MergedBins_236	246	*	2.23321	14.6753	2.7162	3.36129e-13	1.02768e-12
1	73947800	73948200	MergedBins_237	444	*	41.1283	26.4872	-0.634838	9.12707e-08	1.62751e-07
1	73959000	73959600	MergedBins_238	343	*	5.21082	20.4619	1.97336	9.03757e-14	2.96207e-13
1	73967800	73968600	MergedBins_239	431	*	14.5159	25.7116	0.824791	3.19173e-06	4.92321e-06
1	73969600	73969800	MergedBins_240	145	*	1.67491	8.65009	2.36863	1.60095e-07	2.78569e-07
1	73970800	73971200	MergedBins_241	191	*	3.16371	11.3943	1.84862	9.53437e-08	1.69585e-07
1	73971800	73972200	MergedBins_242	286	*	4.09422	17.0616	2.05909	3.75442e-12	1.01926e-11
1	74045600	74046000	MergedBins_243	217	*	20.6572	12.9453	-0.674216	6.98022e-05	9.68822e-05
1	74051000	74051400	MergedBins_244	191	*	2.60541	11.3943	2.12872	9.22704e-09	1.7867e-08
1	74351600	74352000	MergedBins_245	214	*	2.23321	12.7663	2.51515	4.9588e-11	1.1895e-10
1	74352400	74353600	MergedBins_246	574	*	6.88573	34.2424	2.3141	1.36575e-25	1.21327e-24
1	74512800	74513200	MergedBins_247	183	*	2.23321	10.917	2.28939	5.94089e-09	1.16598e-08
1	74514000	74514800	MergedBins_248	486	*	1.67491	28.9927	4.11354	4.08027e-31	4.94848e-30
1	74690600	74691000	MergedBins_249	200	*	2.04711	11.9312	2.54307	1.798e-10	4.06675e-10
1	75147600	75147800	MergedBins_250	153	*	8.93284	9.12733	0.0310745	0.961763	0.970531
1	75367400	75367800	MergedBins_251	188	*	50.9916	11.2153	-2.18479	1.22069e-68	4.48951e-67
1	75386400	75386800	MergedBins_252	235	*	2.97761	14.0191	2.23517	6.1179e-11	1.45365e-10
1	75395400	75395600	MergedBins_253	124	*	0.930504	7.39732	2.99092	4.19112e-10	9.11614e-10
1	75397200	75397400	MergedBins_254	135	*	3.53592	8.05353	1.18754	0.000776501	0.0010004
1	77485800	77486200	MergedBins_255	196	*	3.16371	11.6925	1.8859	4.59374e-08	8.37932e-08
1	77486400	77486600	MergedBins_256	160	*	0.186101	9.54492	5.68058	4.33668e-18	2.15992e-17
1	78679000	78679200	MergedBins_257	146	*	1.86101	8.70974	2.22655	3.20847e-07	5.43375e-07
1	79608200	79608600	MergedBins_258	3	*	0.186101	0.178967	-0.0563884	1	1
1	79687400	79687800	MergedBins_259	11	*	0	0.656214	5.14001	0.0768418	0.0866668
1	80299200	80299400	MergedBins_260	244	*	2.23321	14.556	2.70442	4.59815e-13	1.38892e-12
1	80302800	80303200	MergedBins_261	116	*	2.41931	6.92007	1.51619	0.000253972	0.0003386
1	82254400	82255000	MergedBins_262	353	*	2.60541	21.0585	3.01482	1.07507e-19	6.1963e-19
1	82269200	82269800	MergedBins_263	535	*	6.69963	31.9158	2.25212	2.13488e-23	1.62322e-22
1	82276400	82277000	MergedBins_264	411	*	3.16371	24.5185	2.95418	2.02997e-22	1.44335e-21
1	82277200	82277600	MergedBins_265	229	*	2.60541	13.6612	2.3905	2.80789e-11	6.92526e-11
1	82278600	82278800	MergedBins_266	172	*	0.930504	10.2608	3.46299	4.22519e-15	1.59661e-14
1	82279200	82279600	MergedBins_267	183	*	6.51353	10.917	0.745066	0.00593133	0.00720811
1	82739200	82739400	MergedBins_268	172	*	1.48881	10.2608	2.78491	9.45316e-10	1.99431e-09
1	85908400	85908600	MergedBins_269	120	*	6.32743	7.15869	0.178077	0.587981	0.611259
1	86709800	86710200	MergedBins_270	21	*	0.744403	1.25277	0.750967	0.483819	0.507318
1	87366400	87366800	MergedBins_271	10	*	1.48881	0.596558	-1.31942	0.0852377	0.0958107
1	87413200	87413600	MergedBins_272	209	*	3.16371	12.4681	1.97855	6.77472e-09	1.32433e-08
1	87906800	87907000	MergedBins_273	135	*	0.558303	8.05353	3.8505	4.61448e-13	1.39213e-12
1	87911800	87912200	MergedBins_274	244	*	1.67491	14.556	3.11946	2.68673e-14	9.29977e-14
1	88264800	88265200	MergedBins_275	234	*	6.14133	13.9595	1.18462	7.83646e-06	1.16946e-05
1	88265400	88265600	MergedBins_276	130	*	10.0494	7.75525	-0.373871	0.128712	0.142815
1	89485400	89485800	MergedBins_277	172	*	2.04711	10.2608	2.32548	1.37615e-08	2.62602e-08
1	91006600	91007400	MergedBins_278	477	*	3.16371	28.4558	3.16903	6.08386e-27	5.83627e-26
1	91009200	91009800	MergedBins_279	498	*	13.2132	29.7086	1.1689	7.30492e-11	1.7212e-10
1	91010000	91010200	MergedBins_280	164	*	0.558303	9.78355	4.13124	4.02121e-16	1.67047e-15
1	91014600	91015000	MergedBins_281	236	*	2.97761	14.0788	2.24129	5.25579e-11	1.25674e-10
1	91020800	91021000	MergedBins_282	119	*	2.79151	7.09904	1.34658	0.000601596	0.000780762
1	91024600	91025400	MergedBins_283	762	*	6.51353	45.4577	2.80301	6.26088e-39	1.00988e-37
1	91025600	91026200	MergedBins_284	364	*	1.30271	21.7147	4.05909	1.56728e-23	1.20137e-22
1	91026600	91027200	MergedBins_285	772	*	9.30504	46.0543	2.30725	7.82995e-34	1.06773e-32
1	91027800	91028200	MergedBins_286	256	*	28.6595	15.2719	-0.908137	5.05336e-10	1.09076e-09
1	91033400	91033600	MergedBins_287	154	*	1.48881	9.18699	2.62544	1.61724e-08	3.06637e-08
1	91039600	91040000	MergedBins_288	237	*	2.23321	14.1384	2.66243	1.37518e-12	3.92397e-12
1	91040200	91040600	MergedBins_289	261	*	2.04711	15.5702	2.92712	1.24534e-14	4.47094e-14
1	91041400	91041800	MergedBins_290	269	*	4.65252	16.0474	1.78626	4.39773e-10	9.53432e-10
1	91043200	91043400	MergedBins_291	140	*	2.41931	8.35181	1.78749	8.28747e-06	1.23416e-05
1	91048600	91048800	MergedBins_292	152	*	1.86101	9.06768	2.28465	1.27688e-07	2.24672e-07
1	91049400	91050000	MergedBins_293	534	*	21.4016	31.8562	0.573855	0.000118567	0.000162056
1	91075000	91075200	MergedBins_294	122	*	31.451	7.278	-2.11149	7.85658e-41	1.35021e-39
1	91077000	91077400	MergedBins_295	327	*	12.841	19.5074	0.603271	0.0018033	0.00226511
1	91077600	91078000	MergedBins_296	345	*	8.93284	20.5812	1.20414	3.43223e-08	6.32811e-08
1	91078400	91078800	MergedBins_297	289	*	24.007	17.2405	-0.477652	0.00204211	0.00255598
1	91081800	91082200	MergedBins_298	200	*	10.0494	11.9312	0.247618	0.294919	0.316894
1	91087000	91087200	MergedBins_299	130	*	1.48881	7.75525	2.38102	6.9259e-07	1.1335e-06
1	91087600	91089000	MergedBins_300	1274	*	49.6889	76.0015	0.613103	2.41952e-10	5.40967e-10
1	91089600	91090400	MergedBins_301	1304	*	21.4016	77.7911	1.86189	1.27816e-45	2.61444e-44
1	91094200	91094600	MergedBins_302	189	*	0.930504	11.2749	3.59896	5.31888e-17	2.4138e-16
1	91094800	91095200	MergedBins_303	226	*	0.558303	13.4822	4.59387	2.12237e-23	1.6148e-22
1	91095400	91095800	MergedBins_304	205	*	1.67491	12.2294	2.8682	1.30752e-11	3.34162e-11
1	91098000	91098200	MergedBins_305	84	*	2.41931	5.01108	1.05053	0.0173537	0.0204467
1	91107200	91107400	MergedBins_306	165	*	46.153	9.8432	-2.22922	4.51806e-64	1.48727e-62
1	91109000	91110000	MergedBins_307	652	*	42.0588	38.8956	-0.112802	0.33014	0.352793
1	91110200	91110400	MergedBins_308	119	*	33.1259	7.09904	-2.22227	3.58219e-46	7.46245e-45
1	91121600	91122000	MergedBins_309	209	*	21.5877	12.4681	-0.791973	2.1756e-06	3.40609e-06
1	91201400	91201800	MergedBins_310	165	*	3.72202	9.8432	1.40304	2.84576e-05	4.05906e-05
1	91219800	91220200	MergedBins_311	291	*	2.23321	17.3598	2.95856	2.82625e-16	1.19652e-15
1	91965600	91965800	MergedBins_312	0	*	0.372202	0	-5.96328	0.0589243	0.0670477
1	92010000	92010400	MergedBins_313	50	*	0.186101	2.98279	4.00251	2.19728e-05	3.16286e-05
1	92046000	92046400	MergedBins_314	191	*	2.23321	11.3943	2.35112	1.73861e-09	3.56531e-09
1	92091600	92091800	MergedBins_315	125	*	0.372202	7.45697	4.32443	7.76831e-13	2.2688e-12
1	92096800	92097200	MergedBins_316	265	*	2.97761	15.8088	2.4085	6.24194e-13	1.84933e-12
1	92097600	92098000	MergedBins_317	274	*	0.558303	16.3457	4.87172	6.2468e-29	6.73664e-28
1	92102200	92102400	MergedBins_318	3	*	0.186101	0.178967	-0.0563884	1	1
1	92108000	92108200	MergedBins_319	126	*	0.930504	7.51663	3.014	2.74744e-10	6.09217e-10
1	92119800	92120200	MergedBins_320	246	*	1.48881	14.6753	3.30116	7.28366e-15	2.68494e-14
1	92127400	92127800	MergedBins_321	212	*	4.28032	12.647	1.56301	3.32835e-07	5.63255e-07
1	92138200	92138600	MergedBins_322	178	*	0.558303	10.6187	4.24942	6.56174e-18	3.22264e-17
1	93411800	93412000	MergedBins_323	173	*	1.67491	10.3204	2.62335	2.02592e-09	4.12825e-09
1	93463200	93463400	MergedBins_324	151	*	0.186101	9.00802	5.59705	4.05713e-17	1.85838e-16
1	93584600	93585000	MergedBins_325	208	*	1.11661	12.4084	3.47413	4.28861e-13	1.29785e-12
1	93585800	93586200	MergedBins_326	166	*	0.372202	9.90286	4.73369	1.45383e-17	6.94086e-17
1	93590200	93590400	MergedBins_327	121	*	0.186101	7.21835	5.27751	1.00859e-13	3.29036e-13
1	97709200	97709600	MergedBins_328	157	*	0.372202	9.36596	4.65327	1.36815e-16	5.97822e-16
1	97718400	97719000	MergedBins_329	422	*	31.2649	25.1747	-0.312569	0.0197203	0.023153
1	97738000	97738200	MergedBins_330	140	*	2.79151	8.35181	1.58104	3.39765e-05	4.81644e-05
1	97821200	97821400	MergedBins_331	135	*	34.8009	8.05353	-2.11143	4.92035e-45	9.69558e-44
1	97840200	97840400	MergedBins_332	131	*	13.3993	7.81491	-0.777853	0.000274756	0.000365273
1	97849000	97849400	MergedBins_333	91	*	1.86101	5.42868	1.54452	0.00114138	0.00145193
1	97849800	97851400	MergedBins_334	2705	*	45.7808	161.369	1.81755	1.65219e-90	9.18957e-89
1	97860000	97860200	MergedBins_335	144	*	5.02472	8.59043	0.773687	0.012464	0.0148372
1	97861200	97861400	MergedBins_336	141	*	3.90812	8.41146	1.10588	0.00108939	0.0013883
1	97864200	97865000	MergedBins_337	375	*	36.2897	22.3709	-0.697934	4.15239e-08	7.59511e-08
1	97865600	97865800	MergedBins_338	129	*	0.744403	7.69559	3.36988	1.93917e-11	4.87535e-11
1	97866200	97866600	MergedBins_339	274	*	8.37454	16.3457	0.964828	3.04022e-05	4.32495e-05
1	97872200	97872400	MergedBins_340	133	*	1.11661	7.93422	2.82897	7.07592e-08	1.27545e-07
1	97873400	97874200	MergedBins_341	511	*	11.3522	30.4841	1.42509	4.57816e-14	1.54952e-13
1	97879000	97879600	MergedBins_342	292	*	10.4216	17.4195	0.741119	0.000469274	0.000613261
1	97883000	97883400	MergedBins_343	204	*	21.2155	12.1698	-0.801816	2.04535e-06	3.2075e-06
1	97885600	97885800	MergedBins_344	381	*	47.4557	22.7288	-1.06206	2.05589e-20	1.25137e-19
1	97890000	97890400	MergedBins_345	281	*	6.14133	16.7633	1.44868	1.87382e-08	3.5332e-08
1	97894200	97894600	MergedBins_346	321	*	39.2673	19.1495	-1.03602	1.91154e-16	8.25677e-16
1	97895600	97895800	MergedBins_347	189	*	20.8433	11.2749	-0.886463	2.37812e-07	4.07765e-07
1	97900400	97900600	MergedBins_348	121	*	0.372202	7.21835	4.27751	1.83682e-12	5.15523e-12
1	97902200	97903000	MergedBins_349	454	*	5.95523	27.0837	2.1852	1.52165e-19	8.68603e-19
1	97903600	97904000	MergedBins_350	283	*	1.11661	16.8826	3.91834	2.47437e-18	1.27397e-17
1	97904800	97905400	MergedBins_351	363	*	9.11894	21.655	1.24777	6.46878e-09	1.26584e-08
1	97910800	97911000	MergedBins_352	123	*	1.30271	7.33766	2.49381	8.60242e-07	1.39314e-06
1	97911600	97911800	MergedBins_353	40	*	0.186101	2.38623	3.68058	0.000334745	0.000442215
1	97916000	97916200	MergedBins_354	131	*	2.79151	7.81491	1.48518	0.000118522	0.000162013
1	97956600	97957000	MergedBins_355	204	*	1.30271	12.1698	3.22372	2.21941e-12	6.18751e-12
1	97957200	97957800	MergedBins_356	328	*	6.14133	19.5671	1.67181	3.03202e-11	7.45526e-11
1	97962400	97963200	MergedBins_357	651	*	5.95523	38.8359	2.70516	1.2376e-32	1.58792e-31
1	97963400	97964600	MergedBins_358	606	*	9.67724	36.1514	1.90138	1.8487e-22	1.31695e-21
1	97970200	97970400	MergedBins_359	149	*	5.39692	8.88871	0.719837	0.0165517	0.0195344
1	97971800	97972000	MergedBins_360	126	*	19.5406	7.51663	-1.37832	1.07292e-13	3.48313e-13
1	98033200	98033400	MergedBins_361	126	*	1.48881	7.51663	2.33593	1.28977e-06	2.05689e-06
1	98082200	98082400	MergedBins_362	127	*	1.67491	7.57628	2.17741	2.56755e-06	3.99328e-06
1	98085400	98085600	MergedBins_363	127	*	2.60541	7.57628	1.53998	0.000106696	0.000146114
1	98088000	98088400	MergedBins_364	198	*	3.72202	11.8118	1.66608	3.03716e-07	5.16377e-07
1	104774600	104775000	MergedBins_365	74	*	0.372202	4.41453	3.5681	3.09672e-07	5.25553e-07
1	105604600	105605000	MergedBins_366	26	*	0.744403	1.55105	1.05909	0.203126	0.221658
1	105629600	105630000	MergedBins_367	190	*	0.930504	11.3346	3.60658	3.39053e-17	1.56638e-16
1	106174200	106174600	MergedBins_368	22	*	1.30271	1.31243	0.0107258	0.841929	0.856648
1	106177600	106177800	MergedBins_369	31	*	1.48881	1.84933	0.312845	0.717983	0.737916
1	106178400	106178600	MergedBins_370	140	*	5.39692	8.35181	0.629951	0.0386841	0.0445333
1	106184000	106184200	MergedBins_371	145	*	2.23321	8.65009	1.9536	1.86655e-06	2.93814e-06
1	106215000	106215400	MergedBins_372	187	*	1.86101	11.1556	2.58362	5.58082e-10	1.19956e-09
1	106218000	106218400	MergedBins_373	307	*	2.60541	18.3143	2.81339	1.5025e-16	6.55007e-16
1	106219200	106219600	MergedBins_374	263	*	4.28032	15.6895	1.87401	2.39071e-10	5.34631e-10
1	106260000	106260200	MergedBins_375	122	*	0.930504	7.278	2.96746	6.42705e-10	1.37387e-09
1	106305400	106305800	MergedBins_376	207	*	3.34982	12.3487	1.88221	1.95381e-08	3.6749e-08
1	106385600	106385800	MergedBins_377	206	*	3.34982	12.2891	1.87522	2.26111e-08	4.23386e-08
1	106613600	106613800	MergedBins_378	150	*	1.30271	8.94837	2.78011	1.21153e-08	2.32129e-08
1	106619600	106619800	MergedBins_379	145	*	0.372202	8.65009	4.53856	3.28006e-15	1.25373e-14
1	106627000	106627200	MergedBins_380	165	*	2.23321	9.8432	2.14001	9.2394e-08	1.64624e-07
1	106670600	106670800	MergedBins_381	155	*	0.930504	9.24664	3.31285	3.28526e-13	1.00635e-12
1	106684400	106685000	MergedBins_382	256	*	4.09422	15.2719	1.89922	3.12193e-10	6.87148e-10
1	106686000	106686200	MergedBins_383	124	*	0.558303	7.39732	3.72788	1.0458e-11	2.70641e-11
1	106687000	106687600	MergedBins_384	366	*	4.09422	21.834	2.41492	2.09798e-17	9.89898e-17
1	118477000	118477200	MergedBins_385	137	*	0.186101	8.17284	5.45668	1.58432e-15	6.22706e-15
1	118494800	118495200	MergedBins_386	219	*	1.11661	13.0646	3.54847	7.32114e-14	2.42059e-13
1	118511800	118512400	MergedBins_387	217	*	7.63013	12.9453	0.762648	0.00215518	0.00269361
1	118514200	118514400	MergedBins_388	122	*	1.86101	7.278	1.96746	1.22392e-05	1.79986e-05
1	118514800	118515000	MergedBins_389	136	*	0.930504	8.11319	3.12418	2.19454e-11	5.47108e-11
1	118516800	118517400	MergedBins_390	320	*	23.2626	19.0898	-0.285207	0.0684438	0.0774658
1	118522000	118522400	MergedBins_391	206	*	9.11894	12.2891	0.43044	0.070125	0.0792733
1	118524200	118524800	MergedBins_392	316	*	2.97761	18.8512	2.66243	2.32192e-16	9.91934e-16
1	118525400	118526600	MergedBins_393	824	*	24.9375	49.1564	0.97906	1.48223e-13	4.72763e-13
1	118527800	118528800	MergedBins_394	897	*	22.3321	53.5112	1.26072	2.4039e-20	1.45536e-19
1	118529200	118529600	MergedBins_395	382	*	11.1661	22.7885	1.02919	2.0885e-07	3.60075e-07
1	118530600	118531800	MergedBins_396	617	*	4.65252	36.8076	2.98392	3.61991e-33	4.80287e-32
1	118532000	118532800	MergedBins_397	569	*	3.16371	33.9441	3.42347	2.79963e-33	3.73207e-32
1	118533000	118533400	MergedBins_398	456	*	1.48881	27.203	4.19154	1.73263e-29	1.9312e-28
1	118533800	118535200	MergedBins_399	716	*	11.9105	42.7135	1.84246	1.88643e-25	1.65499e-24
1	118538200	118538400	MergedBins_400	124	*	10.2355	7.39732	-0.468514	0.0540796	0.0617467
1	118539800	118540400	MergedBins_401	552	*	24.7514	32.93	0.411891	0.00348664	0.00429872
1	118540800	118541200	MergedBins_402	426	*	15.0742	25.4134	0.753509	1.66078e-05	2.41524e-05
1	118542400	118542800	MergedBins_403	313	*	46.8974	18.6723	-1.32861	3.22475e-29	3.53158e-28
1	118564800	118565000	MergedBins_404	133	*	2.04711	7.93422	1.9545	5.14196e-06	7.78882e-06
1	118568800	118569200	MergedBins_405	200	*	2.41931	11.9312	2.30207	1.02404e-09	2.14835e-09
1	118569400	118569800	MergedBins_406	204	*	2.41931	12.1698	2.33063	5.54592e-10	1.19343e-09
1	118604800	118605200	MergedBins_407	321	*	0.558303	19.1495	5.10012	2.9426e-34	4.09174e-33
1	118983200	118983600	MergedBins_408	1	*	0.186101	0.0596558	-1.64135	0.426562	0.450291
1	119480400	119480600	MergedBins_409	150	*	6.69963	8.94837	0.417543	0.139039	0.153881
1	119704200	119704400	MergedBins_410	119	*	0.372202	7.09904	4.25347	2.87129e-12	7.88992e-12
1	119705000	119705200	MergedBins_411	159	*	0.744403	9.48527	3.67153	1.2005e-14	4.31959e-14
1	119738400	119738600	MergedBins_412	42	*	2.23321	2.50554	0.166004	0.84694	0.861358
1	119764000	119764400	MergedBins_413	194	*	0.930504	11.5732	3.63663	1.41972e-17	6.79816e-17
1	119794200	119794400	MergedBins_414	119	*	0.186101	7.09904	5.25347	2.72172e-13	8.44024e-13
1	121317800	121318000	MergedBins_415	170	*	0.186101	10.1415	5.76804	2.61097e-19	1.45654e-18
1	125567800	125568000	MergedBins_416	128	*	5.39692	7.63594	0.500668	0.108966	0.121527
1	126191800	126192000	MergedBins_417	183	*	4.09422	10.917	1.41492	8.94871e-06	1.33035e-05
1	126277800	126278000	MergedBins_418	143	*	0.558303	8.53078	3.93356	8.07505e-14	2.65663e-13
1	126305000	126305400	MergedBins_419	194	*	0.558303	11.5732	4.3736	1.14099e-19	6.55956e-19
1	126332400	126332800	MergedBins_420	238	*	1.67491	14.1981	3.08354	6.97523e-14	2.31028e-13
1	126370800	126371200	MergedBins_421	221	*	4.83862	13.1839	1.44611	6.85626e-07	1.12357e-06
1	126381600	126381800	MergedBins_422	142	*	1.30271	8.47112	2.70104	4.30163e-08	7.86299e-08
1	126494800	126495200	MergedBins_423	177	*	2.79151	10.5591	1.91936	1.6398e-07	2.8511e-07
1	126643800	126644000	MergedBins_424	128	*	2.79151	7.63594	1.45176	0.000178755	0.000240775
1	126649600	126649800	MergedBins_425	121	*	8.74674	7.21835	-0.277076	0.303406	0.32555
1	126680200	126680600	MergedBins_426	239	*	22.7043	14.2577	-0.671221	3.213e-05	4.56097e-05
1	126734000	126734200	MergedBins_427	119	*	4.09422	7.09904	0.794035	0.0212542	0.0248866
1	126823600	126823800	MergedBins_428	157	*	0.930504	9.36596	3.33134	1.29241e-13	4.15152e-13
1	126825400	126825800	MergedBins_429	230	*	3.53592	13.7208	1.95621	1.43192e-09	2.9644e-09
1	126828800	126829200	MergedBins_430	231	*	5.21082	13.7805	1.40304	6.31554e-07	1.03828e-06
1	126829800	126830000	MergedBins_431	69	*	0.558303	4.11625	2.88221	6.64761e-06	9.97053e-06
1	127326800	127327000	MergedBins_432	122	*	4.28032	7.278	0.765825	0.0234623	0.0274095
1	127335600	127336000	MergedBins_433	231	*	1.48881	13.7805	3.2104	7.988e-14	2.63028e-13
1	127403800	127404200	MergedBins_434	234	*	1.11661	13.9595	3.64405	6.56446e-15	2.42855e-14
1	127427000	127427200	MergedBins_435	44	*	0.558303	2.62485	2.23312	0.00314571	0.00388815
1	127648200	127648600	MergedBins_436	3	*	1.30271	0.178967	-2.86374	0.00292181	0.00361893
1	128109200	128109600	MergedBins_437	26	*	0.558303	1.55105	1.47413	0.0858077	0.0963843
1	128142400	128142600	MergedBins_438	166	*	6.32743	9.90286	0.646226	0.0205035	0.024045
1	128143200	128143600	MergedBins_439	244	*	1.30271	14.556	3.48203	3.66689e-15	1.39827e-14
1	128155400	128155800	MergedBins_440	340	*	1.11661	20.283	4.18308	2.56367e-22	1.79345e-21
1	131061800	131062000	MergedBins_441	173	*	0.930504	10.3204	3.47135	2.63298e-15	1.01499e-14
1	131080800	131081200	MergedBins_442	185	*	3.16371	11.0363	1.80257	2.27884e-07	3.91634e-07
1	131081600	131081800	MergedBins_443	155	*	0.930504	9.24664	3.31285	3.28526e-13	1.00635e-12
1	131082200	131082600	MergedBins_444	237	*	3.72202	14.1384	1.92546	1.10151e-09	2.30489e-09
1	131083000	131083400	MergedBins_445	200	*	3.16371	11.9312	1.91504	2.55497e-08	4.75728e-08
1	131083600	131084000	MergedBins_446	210	*	1.67491	12.5277	2.90297	5.92696e-12	1.58394e-11
1	131086800	131087000	MergedBins_447	142	*	4.28032	8.47112	0.984834	0.00265053	0.0032934
1	131090000	131090400	MergedBins_448	183	*	3.90812	10.917	1.48203	4.7471e-06	7.20617e-06
1	131094800	131095200	MergedBins_449	164	*	13.3993	9.78355	-0.453724	0.0309384	0.0358283
1	131398800	131399200	MergedBins_450	217	*	1.48881	12.9453	3.1202	7.44574e-13	2.18411e-12
1	131475000	131475200	MergedBins_451	134	*	1.67491	7.99387	2.25481	8.76252e-07	1.41744e-06
1	131503600	131504000	MergedBins_452	191	*	1.86101	11.3943	2.61415	2.98496e-10	6.58652e-10
1	131924400	131924800	MergedBins_453	167	*	21.0294	9.96251	-1.07783	5.39185e-10	1.16071e-09
1	131928000	131928400	MergedBins_454	258	*	36.848	15.3912	-1.25948	2.49878e-21	1.63274e-20
1	131929600	131929800	MergedBins_455	169	*	23.8209	10.0818	-1.24047	6.4502e-14	2.14582e-13
1	131934600	131934800	MergedBins_456	201	*	9.30504	11.9908	0.365845	0.124708	0.138523
1	131936000	131936200	MergedBins_457	126	*	6.32743	7.51663	0.248466	0.423669	0.447446
1	132028600	132029000	MergedBins_458	168	*	4.46642	10.0222	1.166	0.000198297	0.000266235
1	132030600	132031000	MergedBins_459	225	*	2.79151	13.4225	2.26554	1.2139e-10	2.78863e-10
1	132987200	132988200	MergedBins_460	477	*	22.146	28.4558	0.361677	0.0161621	0.0190946
1	132989800	132990200	MergedBins_461	247	*	5.76913	14.735	1.35282	4.81369e-07	8.0058e-07
1	132998400	132998800	MergedBins_462	192	*	3.16371	11.4539	1.85615	8.24122e-08	1.47682e-07
1	133007800	133008000	MergedBins_463	156	*	5.02472	9.3063	0.889164	0.00352678	0.00434584
1	133107000	133107600	MergedBins_464	288	*	1.30271	17.1809	3.72122	3.14848e-18	1.59845e-17
1	133108000	133108200	MergedBins_465	142	*	3.34982	8.47112	1.33847	0.000176572	0.000238079
1	133290200	133291000	MergedBins_466	629	*	3.34982	37.5235	3.48564	5.53389e-37	8.4209e-36
1	133291400	133291800	MergedBins_467	202	*	2.60541	12.0505	2.20951	1.74482e-09	3.5761e-09
1	133404400	133404800	MergedBins_468	25	*	2.79151	1.49139	-0.904385	0.0772975	0.0871371
1	133642400	133642600	MergedBins_469	126	*	1.48881	7.51663	2.33593	1.28977e-06	2.05689e-06
1	133658800	133659000	MergedBins_470	121	*	24.7514	7.21835	-1.77777	3.47259e-25	2.98621e-24
1	133660600	133660800	MergedBins_471	34	*	4.28032	2.0283	-1.07745	0.00743947	0.00897042
1	134631200	134631400	MergedBins_472	131	*	5.39692	7.81491	0.534091	0.0850621	0.0956419
1	134767200	134767600	MergedBins_473	246	*	1.86101	14.6753	2.97924	5.14332e-14	1.72632e-13
1	134798200	134798400	MergedBins_474	134	*	3.53592	7.99387	1.17681	0.000880289	0.00112883
1	134810400	134810600	MergedBins_475	131	*	8.37454	7.81491	-0.099781	0.754698	0.773258
1	134819000	134819400	MergedBins_476	212	*	3.90812	12.647	1.69425	8.4561e-08	1.51264e-07
1	134821600	134822000	MergedBins_477	231	*	7.07183	13.7805	0.962471	0.000138436	0.000188141
1	134826000	134826200	MergedBins_478	124	*	13.9576	7.39732	-0.915973	1.48466e-05	2.16664e-05
1	134831600	134832200	MergedBins_479	459	*	12.0966	27.382	1.17863	3.24615e-10	7.14191e-10
1	134848800	134849400	MergedBins_480	365	*	8.74674	21.7744	1.31581	1.59964e-09	3.28273e-09
1	134852800	134853200	MergedBins_481	168	*	0.930504	10.0222	3.42904	9.7008e-15	3.54242e-14
1	134882400	134882600	MergedBins_482	119	*	2.97761	7.09904	1.25347	0.00109021	0.00138855
1	134888000	134888400	MergedBins_483	174	*	0.744403	10.3801	3.80159	2.24576e-16	9.61581e-16
1	134889000	134889600	MergedBins_484	521	*	13.9576	31.0807	1.15497	3.86884e-11	9.39825e-11
1	134890600	134890800	MergedBins_485	143	*	21.4016	8.53078	-1.32697	4.98228e-14	1.67877e-13
1	134906600	134906800	MergedBins_486	127	*	0.558303	7.57628	3.76237	4.20493e-12	1.13478e-11
1	134914800	134915000	MergedBins_487	164	*	0.558303	9.78355	4.13124	4.02121e-16	1.67047e-15
1	134933800	134934000	MergedBins_488	161	*	0.744403	9.60458	3.68957	7.92069e-15	2.90837e-14
1	134951600	134952000	MergedBins_489	157	*	1.11661	9.36596	3.06831	1.53153e-09	3.15615e-09
1	134954200	134954400	MergedBins_490	152	*	1.67491	9.06768	2.43665	5.39692e-08	9.80004e-08
1	134954600	134955000	MergedBins_491	66	*	0.558303	3.93728	2.81808	1.52909e-05	2.22976e-05
1	135385200	135385600	MergedBins_492	19	*	0.930504	1.13346	0.284649	0.815374	0.831502
1	135682800	135683000	MergedBins_493	35	*	0.186101	2.08795	3.48793	0.000778419	0.00100241
1	135801600	135802000	MergedBins_494	368	*	25.3097	21.9533	-0.205252	0.17163	0.188308
1	135806200	135806600	MergedBins_495	279	*	16.9352	16.644	-0.0250242	0.933805	0.944513
1	135810600	135811000	MergedBins_496	539	*	210.666	32.1545	-2.71187	0	0
1	135841800	135842400	MergedBins_497	4492	*	217.366	267.974	0.301967	1.89562e-10	4.27385e-10
1	135850600	135851000	MergedBins_498	2773	*	834.848	165.425	-2.33533	0	0
1	135851200	135851600	MergedBins_499	2220	*	503.403	132.436	-1.92642	0	0
1	135854200	135854600	MergedBins_500	188	*	2.97761	11.2153	1.91324	6.96098e-08	1.25574e-07
1	136330400	136330600	MergedBins_501	13	*	0.558303	0.775525	0.474126	0.775313	0.793156
1	137927000	137927200	MergedBins_502	130	*	5.02472	7.75525	0.626129	0.0482509	0.0552704
1	137931600	137932000	MergedBins_503	205	*	4.28032	12.2294	1.51457	8.69345e-07	1.40728e-06
1	137951400	137951800	MergedBins_504	300	*	23.4487	17.8967	-0.389812	0.0125436	0.014921
1	137955600	137956000	MergedBins_505	494	*	6.14133	29.47	2.26262	8.48204e-22	5.72792e-21
1	138525200	138525400	MergedBins_506	173	*	0.744403	10.3204	3.79328	3.61162e-16	1.50921e-15
1	138529000	138529400	MergedBins_507	217	*	6.14133	12.9453	1.07581	6.06346e-05	8.44487e-05
1	138612200	138612600	MergedBins_508	264	*	5.76913	15.7491	1.44885	5.12837e-08	9.32289e-08
1	139012600	139012800	MergedBins_509	21	*	0.186101	1.25277	2.75097	0.0256584	0.0298854
1	139029800	139030200	MergedBins_510	220	*	4.28032	13.1243	1.61645	1.09815e-07	1.94132e-07
1	139051800	139052000	MergedBins_511	76	*	1.48881	4.53384	1.60658	0.00247841	0.00308735
1	139055400	139055800	MergedBins_512	257	*	1.86101	15.3315	3.04235	8.99802e-15	3.29538e-14
1	143606400	143606600	MergedBins_513	137	*	2.23321	8.17284	1.87172	6.10836e-06	9.18613e-06
1	150661400	150661600	MergedBins_514	132	*	0.186101	7.87456	5.40304	6.35963e-15	2.35818e-14
1	150674200	150674400	MergedBins_515	128	*	12.0966	7.63594	-0.663719	0.00304289	0.00376353
1	150735200	150735800	MergedBins_516	672	*	7.07183	40.0887	2.50304	1.05059e-31	1.30641e-30
1	150755600	150755800	MergedBins_517	136	*	1.86101	8.11319	2.12418	1.47699e-06	2.34255e-06
1	150757400	150757800	MergedBins_518	261	*	2.04711	15.5702	2.92712	1.24534e-14	4.47094e-14
1	150761200	150761400	MergedBins_519	122	*	2.97761	7.278	1.28939	0.000738044	0.000952481
1	150830400	150830600	MergedBins_520	137	*	1.30271	8.17284	2.64933	9.48189e-08	1.68678e-07
1	150851200	150851400	MergedBins_521	132	*	8.00234	7.87456	-0.0232215	0.997198	1
1	150880200	150880600	MergedBins_522	194	*	2.23321	11.5732	2.3736	1.09533e-09	2.29237e-09
1	150892200	150892600	MergedBins_523	70	*	1.86101	4.1759	1.166	0.0200215	0.0234968
1	150894000	150894200	MergedBins_524	119	*	0.930504	7.09904	2.93154	1.47081e-09	3.03712e-09
1	150911200	150911400	MergedBins_525	139	*	4.09422	8.29215	1.01816	0.00230333	0.00287369
1	150919600	150919800	MergedBins_526	27	*	7.63013	1.61071	-2.24402	1.14912e-11	2.95686e-11
1	150935600	150935800	MergedBins_527	136	*	0.372202	8.11319	4.44611	3.15396e-14	1.08241e-13
1	150937000	150937200	MergedBins_528	124	*	0.930504	7.39732	2.99092	4.19112e-10	9.11614e-10
1	150937600	150937800	MergedBins_529	145	*	1.86101	8.65009	2.21663	3.73966e-07	6.2806e-07
1	150953000	150953400	MergedBins_530	164	*	3.53592	9.78355	1.46827	1.73133e-05	2.512e-05
1	150969200	150969400	MergedBins_531	54	*	3.34982	3.22141	-0.0563884	0.995069	1
1	150970200	150971600	MergedBins_532	1915	*	20.4711	114.241	2.48042	7.78722e-87	4.07062e-85
1	150975800	150976200	MergedBins_533	307	*	3.34982	18.3143	2.45082	5.56448e-15	2.07766e-14
1	150977200	150977400	MergedBins_534	18	*	1.30271	1.0738	-0.278781	0.840504	0.855584
1	150977800	150978000	MergedBins_535	128	*	1.86101	7.63594	2.03672	4.9633e-06	7.52223e-06
1	150988800	150989200	MergedBins_536	298	*	14.1437	17.7774	0.32989	0.08489	0.0954579
1	151346400	151346800	MergedBins_537	453	*	8.56064	27.0241	1.65845	6.57921e-15	2.43241e-14
1	151347200	151347400	MergedBins_538	151	*	5.76913	9.00802	0.642858	0.0283704	0.0329287
1	151363000	151363800	MergedBins_539	282	*	108.869	16.8229	-2.69409	6.24035e-193	8.59266e-191
1	151498400	151498800	MergedBins_540	34	*	7.44403	2.0283	-1.87582	5.23615e-09	1.03143e-08
1	151952600	151952800	MergedBins_541	165	*	0.186101	9.8432	5.72497	1.06348e-18	5.64803e-18
1	152006400	152006800	MergedBins_542	168	*	24.007	10.0222	-1.26026	2.2768e-14	7.96882e-14
1	152546000	152546400	MergedBins_543	158	*	18.0518	9.42561	-0.937483	4.33079e-07	7.23786e-07
1	152548000	152548200	MergedBins_544	121	*	0.930504	7.21835	2.95558	9.72133e-10	2.04516e-09
1	152603600	152604200	MergedBins_545	340	*	1.30271	20.283	3.96069	7.41851e-22	5.02474e-21
1	152607400	152608000	MergedBins_546	404	*	9.86334	24.1009	1.28894	3.69497e-10	8.08368e-10
1	152618400	152618800	MergedBins_547	329	*	5.95523	19.6267	1.72059	1.30785e-11	3.3417e-11
1	152620800	152621000	MergedBins_548	121	*	7.07183	7.21835	0.0295849	0.985805	0.992662
1	152622000	152622200	MergedBins_549	126	*	4.09422	7.51663	0.876497	0.0100506	0.0120227
1	152622600	152623000	MergedBins_550	58	*	0.372202	3.46003	3.21663	2.5967e-05	3.71366e-05
1	152886400	152886600	MergedBins_551	120	*	0.372202	7.15869	4.26554	3.05539e-12	8.36024e-12
1	152894000	152894400	MergedBins_552	296	*	3.16371	17.6581	2.48064	1.26191e-14	4.52611e-14
1	153219000	153219800	MergedBins_553	623	*	17.6796	37.1655	1.07188	6.96649e-12	1.84126e-11
1	153220000	153221800	MergedBins_554	2025	*	62.3438	120.803	0.954338	4.30831e-30	4.94361e-29
1	153223600	153223800	MergedBins_555	375	*	19.9128	22.3709	0.167929	0.312727	0.335073
1	153226200	153226600	MergedBins_556	312	*	19.5406	18.6126	-0.0701942	0.708264	0.728724
1	153227400	153227800	MergedBins_557	238	*	24.7514	14.1981	-0.801816	2.75491e-07	4.70514e-07
1	153228600	153229200	MergedBins_558	744	*	101.611	44.3839	-1.19495	1.88756e-51	4.51535e-50
1	153230600	153231000	MergedBins_559	560	*	71.4627	33.4072	-1.09703	1.03666e-31	1.29051e-30
1	153231600	153232000	MergedBins_560	347	*	43.7337	20.7006	-1.07908	2.00322e-19	1.12866e-18
1	153233400	153233600	MergedBins_561	211	*	26.6124	12.5874	-1.08012	2.33793e-12	6.50186e-12
1	153234400	153234800	MergedBins_562	214	*	26.4263	12.7663	-1.04963	9.80596e-12	2.55348e-11
1	153239200	153239400	MergedBins_563	184	*	36.2897	10.9767	-1.72512	1.15367e-34	1.62217e-33
1	153243600	153244000	MergedBins_564	284	*	24.7514	16.9422	-0.546886	0.000353808	0.000466633
1	153245000	153245400	MergedBins_565	233	*	0.930504	13.8998	3.90091	5.66576e-22	3.87006e-21
1	153245800	153246000	MergedBins_566	130	*	0.186101	7.75525	5.38102	9.97276e-15	3.63117e-14
1	153246400	153246800	MergedBins_567	217	*	1.67491	12.9453	2.95028	1.95553e-12	5.47888e-12
1	153302200	153303200	MergedBins_568	739	*	5.39692	44.0856	3.0301	7.91494e-40	1.30846e-38
1	153304200	153304400	MergedBins_569	139	*	3.34982	8.29215	1.30767	0.000261754	0.000348604
1	153308000	153308600	MergedBins_570	445	*	1.86101	26.5468	3.83438	8.38094e-28	8.46415e-27
1	153309400	153309600	MergedBins_571	135	*	1.48881	8.05353	2.43546	3.17727e-07	5.38495e-07
1	153311600	153312000	MergedBins_572	354	*	9.11894	21.1181	1.21154	1.96808e-08	3.70112e-08
1	153312200	153312800	MergedBins_573	446	*	3.72202	26.6065	2.83762	1.41672e-23	1.08892e-22
1	153315800	153316000	MergedBins_574	69	*	0.372202	4.11625	3.46717	1.15095e-06	1.84463e-06
1	153317000	153317200	MergedBins_575	168	*	10.6077	10.0222	-0.0819235	0.769707	0.787706
1	153323000	153323400	MergedBins_576	173	*	1.11661	10.3204	3.20831	1.18069e-10	2.729e-10
1	153325400	153325600	MergedBins_577	122	*	1.48881	7.278	2.28939	2.39803e-06	3.74084e-06
1	155279800	155280000	MergedBins_578	121	*	8.93284	7.21835	-0.30745	0.245247	0.265722
1	155794000	155794400	MergedBins_579	221	*	1.11661	13.1839	3.56159	5.30831e-14	1.77799e-13
1	155942400	155943000	MergedBins_580	285	*	2.97761	17.0019	2.51347	2.85725e-14	9.85979e-14
1	156006000	156006200	MergedBins_581	8	*	5.39692	0.477246	-3.49933	7.19342e-14	2.38045e-13
1	156471600	156471800	MergedBins_582	149	*	1.48881	8.88871	2.57782	3.54882e-08	6.53346e-08
1	156600400	156600800	MergedBins_583	58	*	1.48881	3.46003	1.21663	0.0308271	0.035703
1	156866400	156866800	MergedBins_584	149	*	1.30271	8.88871	2.77046	1.41967e-08	2.70585e-08
1	157189600	157189800	MergedBins_585	141	*	1.30271	8.41146	2.69085	5.03883e-08	9.16601e-08
1	157360600	157360800	MergedBins_586	162	*	0.744403	9.66424	3.6985	4.90313e-15	1.84353e-14
1	157476400	157476600	MergedBins_587	133	*	0.744403	7.93422	3.41393	8.28605e-12	2.17071e-11
1	159340200	159340400	MergedBins_588	156	*	2.04711	9.3063	2.18462	1.5968e-07	2.78018e-07
1	160388600	160389000	MergedBins_589	164	*	2.60541	9.78355	1.90885	5.19819e-07	8.62367e-07
1	160461000	160461400	MergedBins_590	162	*	5.02472	9.66424	0.943612	0.00182041	0.00228609
1	160540000	160540400	MergedBins_591	215	*	1.30271	12.826	3.29949	3.81908e-13	1.16324e-12
1	160569200	160569800	MergedBins_592	292	*	1.67491	17.4195	3.37855	1.27761e-17	6.14371e-17
1	160571600	160571800	MergedBins_593	126	*	7.07183	7.51663	0.0880015	0.811436	0.827785
1	160601000	160601400	MergedBins_594	188	*	1.67491	11.2153	2.74331	1.91491e-10	4.31218e-10
1	160607400	160607800	MergedBins_595	204	*	0.930504	12.1698	3.70915	1.01643e-18	5.40837e-18
1	160610200	160610400	MergedBins_596	123	*	3.16371	7.33766	1.2137	0.00115639	0.00146953
1	160612600	160613000	MergedBins_597	189	*	0.558303	11.2749	4.33593	4.43562e-19	2.41246e-18
1	160625600	160625800	MergedBins_598	208	*	7.07183	12.4084	0.811161	0.00160577	0.00202284
1	160667800	160668200	MergedBins_599	192	*	1.11661	11.4539	3.35865	5.6019e-12	1.50026e-11
1	160715800	160716000	MergedBins_600	116	*	0.186101	6.92007	5.21663	3.99427e-13	1.213e-12
1	160719000	160719400	MergedBins_601	179	*	0.372202	10.6784	4.84246	3.654e-19	2.00863e-18
1	160744400	160744800	MergedBins_602	3	*	0.186101	0.178967	-0.0563884	1	1
1	160774200	160774400	MergedBins_603	134	*	1.86101	7.99387	2.10281	2.00144e-06	3.13996e-06
1	161012600	161012800	MergedBins_604	22	*	1.48881	1.31243	-0.181919	0.926138	0.937429
1	161821800	161822000	MergedBins_605	152	*	2.23321	9.06768	2.02161	6.55897e-07	1.07595e-06
1	162678000	162678200	MergedBins_606	123	*	10.7938	7.33766	-0.556817	0.0186998	0.0219869
1	162679400	162679600	MergedBins_607	124	*	12.841	7.39732	-0.795679	0.000278049	0.000369478
1	162705400	162705600	MergedBins_608	133	*	45.0364	7.93422	-2.50493	2.07255e-73	8.5095e-72
1	162712600	162713000	MergedBins_609	249	*	3.72202	14.8543	1.99672	1.88126e-10	4.24402e-10
1	162715400	162715800	MergedBins_610	161	*	67.1824	9.60458	-2.80629	6.75378e-126	5.69081e-124
1	163246800	163247000	MergedBins_611	141	*	0.930504	8.41146	3.17627	9.91621e-12	2.57507e-11
1	163303800	163304200	MergedBins_612	241	*	3.16371	14.377	2.18408	5.63855e-11	1.34314e-10
1	164437200	164437600	MergedBins_613	280	*	15.6325	16.7036	0.0956147	0.637127	0.658954
1	164438000	164438600	MergedBins_614	1065	*	78.3485	63.5334	-0.30239	0.000297631	0.000394524
1	164439200	164439400	MergedBins_615	280	*	12.6549	16.7036	0.400469	0.045789	0.0525036
1	164441400	164441600	MergedBins_616	165	*	6.88573	9.8432	0.515518	0.0583776	0.066439
1	164443200	164443400	MergedBins_617	121	*	8.18844	7.21835	-0.181919	0.531338	0.555237
1	164444200	164444600	MergedBins_618	218	*	6.14133	13.005	1.08244	5.38933e-05	7.53759e-05
1	164453400	164453800	MergedBins_619	227	*	26.4263	13.5419	-0.96455	2.8794e-10	6.37352e-10
1	164457600	164458000	MergedBins_620	188	*	21.5877	11.2153	-0.944743	2.41664e-08	4.51162e-08
1	165229600	165230000	MergedBins_621	18	*	0.744403	1.0738	0.528574	0.62501	0.647252
1	165378600	165379000	MergedBins_622	341	*	3.53592	20.3426	2.52435	7.09694e-17	3.1773e-16
1	165385200	165385600	MergedBins_623	167	*	1.30271	9.96251	2.935	8.13541e-10	1.72307e-09
1	165386000	165386600	MergedBins_624	525	*	3.72202	31.3193	3.07289	5.74878e-29	6.22334e-28
1	165631600	165632000	MergedBins_625	161	*	0.744403	9.60458	3.68957	7.92069e-15	2.90837e-14
1	165670800	165671200	MergedBins_626	197	*	0.372202	11.7522	4.9807	4.08887e-21	2.63362e-20
1	165672000	165672400	MergedBins_627	204	*	2.41931	12.1698	2.33063	5.54592e-10	1.19343e-09
1	165674800	165675000	MergedBins_628	152	*	3.72202	9.06768	1.28465	0.000157118	0.00021261
1	165678800	165679000	MergedBins_629	190	*	1.30271	11.3346	3.12115	2.07892e-11	5.20006e-11
1	165682200	165682400	MergedBins_630	144	*	1.11661	8.59043	2.94361	1.22379e-08	2.34161e-08
1	165696400	165696600	MergedBins_631	119	*	4.28032	7.09904	0.729905	0.0317859	0.0367644
1	165700800	165701200	MergedBins_632	250	*	7.25793	14.9139	1.03903	2.60378e-05	3.72331e-05
1	165768400	165768600	MergedBins_633	13	*	0.372202	0.775525	1.05909	0.546062	0.569569
1	166117200	166117600	MergedBins_634	175	*	2.04711	10.4398	2.35043	8.6688e-09	1.68207e-08
1	166121200	166121400	MergedBins_635	143	*	7.63013	8.53078	0.160968	0.58632	0.609702
1	167024800	167025000	MergedBins_636	10	*	0.744403	0.596558	-0.319423	0.755534	0.773833
1	168155400	168156000	MergedBins_637	449	*	2.04711	26.7854	3.70979	1.24968e-27	1.24868e-26
1	168158200	168158600	MergedBins_638	192	*	1.30271	11.4539	3.13626	1.51052e-11	3.83436e-11
1	168161000	168161400	MergedBins_639	186	*	5.95523	11.096	0.897808	0.00125767	0.00159447
1	168210600	168210800	MergedBins_640	120	*	0.372202	7.15869	4.26554	3.05539e-12	8.36024e-12
1	168214000	168214200	MergedBins_641	7	*	0.372202	0.41759	0.166004	1	1
1	168240800	168241000	MergedBins_642	119	*	1.11661	7.09904	2.6685	6.55676e-07	1.07595e-06
1	168254800	168255000	MergedBins_643	219	*	0.930504	13.0646	3.81151	3.28812e-20	1.97165e-19
1	168268200	168269000	MergedBins_644	428	*	1.30271	25.5327	4.29276	5.3312e-28	5.42293e-27
1	168272600	168273000	MergedBins_645	119	*	6.88573	7.09904	0.0440135	0.945218	0.954859
1	168274200	168274600	MergedBins_646	146	*	1.86101	8.70974	2.22655	3.20847e-07	5.43375e-07
1	168287400	168287600	MergedBins_647	146	*	1.30271	8.70974	2.74112	2.2837e-08	4.27474e-08
1	168294400	168294600	MergedBins_648	129	*	4.09422	7.69559	0.910445	0.00721815	0.00871473
1	168298400	168298800	MergedBins_649	273	*	11.5383	16.286	0.49721	0.0164766	0.0194498
1	168303000	168303400	MergedBins_650	219	*	1.11661	13.0646	3.54847	7.32114e-14	2.42059e-13
1	168304800	168306600	MergedBins_651	1651	*	12.6549	98.4917	2.96031	1.01516e-85	5.18653e-84
1	168307800	168308400	MergedBins_652	290	*	1.30271	17.3002	3.7312	2.28367e-18	1.18009e-17
1	168308600	168309400	MergedBins_653	472	*	4.83862	28.1575	2.54085	5.89505e-23	4.3334e-22
1	168310600	168311000	MergedBins_654	260	*	2.97761	15.5105	2.38102	1.3453e-12	3.84162e-12
1	168315400	168315800	MergedBins_655	218	*	3.90812	13.005	1.73452	3.60502e-08	6.63368e-08
1	168316000	168316400	MergedBins_656	501	*	9.11894	29.8875	1.71261	6.5355e-17	2.93059e-16
1	168317200	168317600	MergedBins_657	325	*	15.6325	19.3881	0.310628	0.0882264	0.0990026
1	168323800	168324600	MergedBins_658	447	*	7.63013	26.6661	1.80523	4.45006e-16	1.84185e-15
1	168326800	168327400	MergedBins_659	611	*	2.23321	36.4497	4.02872	1.96119e-38	3.10572e-37
1	168328400	168329000	MergedBins_660	295	*	1.30271	17.5985	3.75587	1.02315e-18	5.44154e-18
1	168329600	168330000	MergedBins_661	199	*	2.04711	11.8715	2.53584	2.10103e-10	4.71905e-10
1	168330800	168331200	MergedBins_662	183	*	8.93284	10.917	0.289386	0.245123	0.265638
1	168332000	168332800	MergedBins_663	561	*	8.74674	33.4669	1.93592	2.86299e-21	1.86856e-20
1	168333600	168334200	MergedBins_664	272	*	7.25793	16.2264	1.16071	1.93164e-06	3.03552e-06
1	168334800	168335200	MergedBins_665	242	*	3.53592	14.4367	2.02958	2.4257e-10	5.4224e-10
1	168335800	168336200	MergedBins_666	230	*	5.76913	13.7208	1.24994	4.242e-06	6.469e-06
1	168337600	168338000	MergedBins_667	199	*	12.2827	11.8715	-0.0491204	0.866528	0.88017
1	168339400	168339600	MergedBins_668	140	*	1.11661	8.35181	2.90297	2.31754e-08	4.33664e-08
1	168351200	168351800	MergedBins_669	298	*	12.0966	17.7774	0.55545	0.00562898	0.00684805
1	168354600	168355000	MergedBins_670	182	*	6.51353	10.8574	0.737161	0.00653902	0.00792105
1	168356800	168357000	MergedBins_671	131	*	6.14133	7.81491	0.347678	0.250461	0.271189
1	168357400	168358200	MergedBins_672	396	*	3.16371	23.6237	2.90054	2.14619e-21	1.41216e-20
1	168358800	168359200	MergedBins_673	144	*	0.558303	8.59043	3.94361	4.98234e-14	1.67877e-13
1	168359800	168360600	MergedBins_674	344	*	4.46642	20.5216	2.19995	3.212e-15	1.23016e-14
1	168361000	168361600	MergedBins_675	768	*	8.56064	45.8156	2.42005	4.73843e-35	6.78094e-34
1	168362000	168362200	MergedBins_676	127	*	0.558303	7.57628	3.76237	4.20493e-12	1.13478e-11
1	168363400	168364200	MergedBins_677	352	*	5.21082	20.9988	2.01073	2.40548e-14	8.38539e-14
1	168364400	168365200	MergedBins_678	397	*	5.95523	23.6833	1.99164	7.1992e-16	2.92186e-15
1	168365600	168366400	MergedBins_679	560	*	16.0047	33.4072	1.06167	1.10048e-10	2.55091e-10
1	168366800	168368000	MergedBins_680	1024	*	22.146	61.0875	1.46383	1.18433e-27	1.18864e-26
1	168368200	168368800	MergedBins_681	374	*	4.46642	22.3113	2.32058	3.43028e-17	1.5841e-16
1	168369400	168369800	MergedBins_682	298	*	5.39692	17.7774	1.71984	1.24848e-10	2.86633e-10
1	168370800	168371200	MergedBins_683	206	*	1.11661	12.2891	3.46019	5.91381e-13	1.75579e-12
1	168371600	168372600	MergedBins_684	946	*	9.67724	56.4344	2.54391	1.34737e-44	2.61845e-43
1	168373600	168374200	MergedBins_685	344	*	2.60541	20.5216	2.97756	4.44891e-19	2.41852e-18
1	168375400	168376800	MergedBins_686	1306	*	13.2132	77.9104	2.55984	2.81163e-61	8.81837e-60
1	168377000	168377400	MergedBins_687	218	*	1.11661	13.005	3.54187	8.59778e-14	2.82038e-13
1	168377600	168378000	MergedBins_688	195	*	4.65252	11.6329	1.32212	1.14461e-05	1.68718e-05
1	168380000	168380200	MergedBins_689	125	*	1.30271	7.45697	2.51708	6.28281e-07	1.03335e-06
1	168381000	168381400	MergedBins_690	212	*	3.72202	12.647	1.76464	4.14387e-08	7.58321e-08
1	168385000	168385200	MergedBins_691	222	*	5.02472	13.2436	1.39818	1.11961e-06	1.79617e-06
1	168392800	168393200	MergedBins_692	222	*	1.67491	13.2436	2.98314	8.85028e-13	2.57747e-12
1	168393400	168393800	MergedBins_693	174	*	1.30271	10.3801	2.99424	2.66852e-10	5.92765e-10
1	168394000	168394600	MergedBins_694	397	*	3.90812	23.6833	2.59933	7.31823e-20	4.27349e-19
1	168396000	168396800	MergedBins_695	371	*	8.00234	22.1323	1.46766	6.42171e-11	1.52007e-10
1	168397000	168399200	MergedBins_696	3691	*	43.5476	220.189	2.33808	1.49046e-157	1.64988e-155
1	168399400	168400000	MergedBins_697	336	*	8.18844	20.0443	1.29153	1.11369e-08	2.13964e-08
1	168400600	168401800	MergedBins_698	605	*	10.7938	36.0917	1.74146	1.70463e-20	1.04603e-19
1	168402000	168402600	MergedBins_699	748	*	3.90812	44.6225	3.51323	7.03711e-44	1.3354e-42
1	168407200	168407600	MergedBins_700	264	*	7.63013	15.7491	1.04549	1.39011e-05	2.03563e-05
1	168408400	168409200	MergedBins_701	813	*	74.9986	48.5001	-0.628875	7.03644e-13	2.07817e-12
1	168409400	168409600	MergedBins_702	127	*	1.67491	7.57628	2.17741	2.56755e-06	3.99328e-06
1	168410600	168411000	MergedBins_703	339	*	3.16371	20.2233	2.67633	1.6043e-17	7.6302e-17
1	168413000	168413400	MergedBins_704	257	*	4.09422	15.3315	1.90484	2.69797e-10	5.9919e-10
1	168413800	168414400	MergedBins_705	566	*	5.76913	33.7652	2.54911	2.56669e-27	2.51131e-26
1	168414600	168414800	MergedBins_706	129	*	2.60541	7.69559	1.56252	8.06914e-05	0.000111461
1	168415000	168416000	MergedBins_707	773	*	5.02472	46.1139	3.19809	5.35195e-43	9.84184e-42
1	168416600	168416800	MergedBins_708	153	*	3.16371	9.12733	1.52857	2.1232e-05	3.06091e-05
1	168419000	168420400	MergedBins_709	1062	*	13.0271	63.3544	2.28193	1.57047e-45	3.20655e-44
1	168420800	168421400	MergedBins_710	357	*	4.09422	21.2971	2.379	8.31402e-17	3.70602e-16
1	168423000	168423600	MergedBins_711	517	*	11.7244	30.842	1.39539	7.12258e-14	2.3577e-13
1	168424600	168425000	MergedBins_712	296	*	7.63013	17.6581	1.21055	3.04074e-07	5.16908e-07
1	168425400	168426200	MergedBins_713	745	*	23.8209	44.4436	0.899746	4.55157e-11	1.09718e-10
1	168426800	168427600	MergedBins_714	555	*	7.07183	33.109	2.22707	5.53046e-24	4.33341e-23
1	169693800	169694200	MergedBins_715	196	*	66.0658	11.6925	-2.49832	1.21188e-106	8.34352e-105
1	170194800	170195200	MergedBins_716	202	*	2.41931	12.0505	2.31642	7.53718e-10	1.60268e-09
1	170334800	170335000	MergedBins_717	132	*	0.186101	7.87456	5.40304	6.35963e-15	2.35818e-14
1	170448400	170448600	MergedBins_718	205	*	0.186101	12.2294	6.03813	1.44952e-23	1.11262e-22
1	170506200	170506600	MergedBins_719	231	*	4.09422	13.7805	1.75097	1.15468e-08	2.2165e-08
1	170508400	170509000	MergedBins_720	359	*	12.4688	21.4164	0.7804	4.95121e-05	6.9403e-05
1	170586200	170586400	MergedBins_721	129	*	1.86101	7.69559	2.04795	4.2677e-06	6.50642e-06
1	170813200	170813400	MergedBins_722	37	*	0.558303	2.20726	1.98314	0.00951364	0.0113936
1	171129200	171129600	MergedBins_723	248	*	18.7962	14.7946	-0.345366	0.0487826	0.0558625
1	171142200	171142400	MergedBins_724	129	*	4.83862	7.69559	0.669437	0.0371379	0.0427794
1	171440000	171440200	MergedBins_725	142	*	5.95523	8.47112	0.508396	0.0851134	0.0956901
1	172003800	172004200	MergedBins_726	169	*	14.1437	10.0818	-0.488399	0.0169236	0.0199587
1	172191800	172192000	MergedBins_727	170	*	1.67491	10.1415	2.59812	3.24309e-09	6.48216e-09
1	172216800	172217000	MergedBins_728	146	*	16.0047	8.70974	-0.877791	7.86206e-06	1.17297e-05
1	172217800	172218000	MergedBins_729	130	*	11.7244	7.75525	-0.596263	0.00859924	0.0103281
1	172505800	172507000	MergedBins_730	1298	*	9.86334	77.4332	2.9728	6.24237e-68	2.25184e-66
1	176798800	176799000	MergedBins_731	150	*	1.11661	8.94837	3.00251	4.69202e-09	9.26505e-09
1	176800000	176800400	MergedBins_732	329	*	5.39692	19.6267	1.86261	1.48256e-12	4.21228e-12
1	177061800	177062000	MergedBins_733	38	*	0.186101	2.26692	3.60658	0.000508787	0.000663285
1	177181600	177182000	MergedBins_734	224	*	0.372202	13.3629	5.166	2.59476e-24	2.0882e-23
1	177194200	177194400	MergedBins_735	18	*	3.34982	1.0738	-1.64135	0.000659698	0.000854496
1	177223600	177224200	MergedBins_736	422	*	2.97761	25.1747	3.07975	1.37156e-23	1.05565e-22
1	177225400	177225800	MergedBins_737	231	*	2.97761	13.7805	2.2104	1.12237e-10	2.60059e-10
1	177226400	177226600	MergedBins_738	189	*	1.48881	11.2749	2.92089	6.39537e-11	1.51416e-10
1	177246600	177246800	MergedBins_739	122	*	0.558303	7.278	3.70442	1.59121e-11	4.02473e-11
1	178198400	178199200	MergedBins_740	374	*	4.28032	22.3113	2.38198	1.46154e-17	6.97476e-17
1	178201000	178201200	MergedBins_741	127	*	2.79151	7.57628	1.44044	0.000204858	0.000274611
1	178210400	178210600	MergedBins_742	138	*	2.41931	8.2325	1.76673	1.10827e-05	1.63447e-05
1	178215600	178215800	MergedBins_743	136	*	2.41931	8.11319	1.74567	1.4808e-05	2.16157e-05
1	178226800	178227000	MergedBins_744	133	*	1.11661	7.93422	2.82897	7.07592e-08	1.27545e-07
1	178235600	178236000	MergedBins_745	72	*	3.16371	4.29522	0.441111	0.310252	0.33258
1	178555600	178556000	MergedBins_746	154	*	0.930504	9.18699	3.30351	3.04367e-13	9.36149e-13
1	178606600	178606800	MergedBins_747	128	*	2.97761	7.63594	1.35865	0.000334414	0.000441881
1	178627400	178627600	MergedBins_748	12	*	0.558303	0.715869	0.358649	1	1
1	178723200	178723800	MergedBins_749	473	*	34.2426	28.2172	-0.279216	0.0288492	0.0334741
1	178725000	178725200	MergedBins_750	137	*	2.23321	8.17284	1.87172	6.10836e-06	9.18613e-06
1	178726400	178726800	MergedBins_751	219	*	3.72202	13.0646	1.81151	1.51324e-08	2.87546e-08
1	178806600	178806800	MergedBins_752	16	*	0.372202	0.954492	1.35865	0.273683	0.295116
1	178828000	178828800	MergedBins_753	1015	*	1.11661	60.5506	5.76095	1.823e-69	6.83838e-68
1	179281200	179281600	MergedBins_754	352	*	8.56064	20.9988	1.29452	4.66268e-09	9.21841e-09
1	179308000	179308200	MergedBins_755	157	*	6.51353	9.36596	0.523987	0.0615436	0.0698942
1	179336000	179336600	MergedBins_756	392	*	1.30271	23.3851	4.166	1.73946e-25	1.5308e-24
1	179364000	179364400	MergedBins_757	288	*	0.930504	17.1809	4.20665	3.64168e-28	3.74143e-27
1	179381600	179382000	MergedBins_758	238	*	5.58303	14.1981	1.34658	8.51104e-07	1.38052e-06
1	179391200	179391400	MergedBins_759	154	*	1.67491	9.18699	2.45551	3.95293e-08	7.24671e-08
1	180345600	180346000	MergedBins_760	249	*	8.18844	14.8543	0.859219	0.000285843	0.000379521
1	180361600	180361800	MergedBins_761	133	*	0.558303	7.93422	3.82897	1.20266e-12	3.44039e-12
1	180691000	180691200	MergedBins_762	0	*	0	0	0	1	1
1	181832000	181832400	MergedBins_763	24	*	9.86334	1.43174	-2.78431	2.5528e-19	1.42762e-18
1	181836000	181836200	MergedBins_764	26	*	9.30504	1.55105	-2.58477	9.75646e-17	4.31493e-16
1	181900000	181900200	MergedBins_765	121	*	4.65252	7.21835	0.633656	0.0550044	0.0627582
1	181916200	181916400	MergedBins_766	254	*	0.930504	15.1526	4.02541	2.73496e-24	2.19357e-23
1	181917200	181917400	MergedBins_767	138	*	4.46642	8.2325	0.882211	0.00659553	0.00798864
1	181946800	181947200	MergedBins_768	313	*	8.18844	18.6723	1.18924	1.94655e-07	3.36474e-07
1	181948200	181948800	MergedBins_769	303	*	3.34982	18.0757	2.4319	1.02938e-14	3.74083e-14
1	181953600	181954000	MergedBins_770	159	*	3.16371	9.48527	1.58407	9.22896e-06	1.37057e-05
1	181981400	181981800	MergedBins_771	90	*	4.83862	5.36902	0.150063	0.719517	0.739426
1	181983600	181984400	MergedBins_772	727	*	6.14133	43.3697	2.82007	2.28026e-37	3.49816e-36
1	182004400	182004800	MergedBins_773	442	*	5.02472	26.3679	2.39166	1.40861e-20	8.69579e-20
1	182006000	182006200	MergedBins_774	155	*	5.39692	9.24664	0.776793	0.00911914	0.0109327
1	182007600	182007800	MergedBins_775	15	*	0.558303	0.894837	0.680577	0.588936	0.612084
1	182009000	182009200	MergedBins_776	148	*	3.72202	8.82905	1.24617	0.000262707	0.000349749
1	182009600	182010000	MergedBins_777	258	*	2.41931	15.3912	2.66944	1.2845e-13	4.13316e-13
1	182010600	182010800	MergedBins_778	127	*	2.04711	7.57628	1.8879	1.25513e-05	1.84287e-05
1	182012000	182012400	MergedBins_779	274	*	3.53592	16.3457	2.20875	2.00197e-12	5.59788e-12
1	182975000	182975200	MergedBins_780	6	*	0.186101	0.357935	0.943612	1	1
1	183189200	183189400	MergedBins_781	45	*	0.186101	2.68451	3.8505	8.58586e-05	0.00011831
1	183364800	183365000	MergedBins_782	120	*	1.48881	7.15869	2.26554	3.26773e-06	5.02875e-06
1	186112400	186112600	MergedBins_783	130	*	1.67491	7.75525	2.21109	1.62081e-06	2.56023e-06
1	186688200	186688400	MergedBins_784	194	*	1.30271	11.5732	3.15121	1.09744e-11	2.83099e-11
1	186702200	186702600	MergedBins_785	184	*	7.25793	10.9767	0.596809	0.0222928	0.0260838
1	187632400	187632600	MergedBins_786	134	*	1.48881	7.99387	2.42474	3.71374e-07	6.24172e-07
1	187632800	187633600	MergedBins_787	593	*	7.25793	35.3759	2.28514	4.15455e-26	3.81064e-25
1	187644600	187644800	MergedBins_788	134	*	1.67491	7.99387	2.25481	8.76252e-07	1.41744e-06
1	187645600	187646000	MergedBins_789	195	*	2.23321	11.6329	2.38102	9.3885e-10	1.98178e-09
1	187646200	187646600	MergedBins_790	165	*	1.67491	9.8432	2.55505	7.0966e-09	1.38605e-08
1	187647000	187647400	MergedBins_791	770	*	21.4016	45.9349	1.10187	6.82052e-15	2.51915e-14
1	187649200	187649600	MergedBins_792	240	*	5.39692	14.3174	1.40756	3.5648e-07	6.00033e-07
1	187652200	187652400	MergedBins_793	149	*	6.51353	8.88871	0.448535	0.115057	0.128142
1	187681600	187681800	MergedBins_794	148	*	2.04711	8.82905	2.10867	5.38513e-07	8.91155e-07
1	187684200	187684400	MergedBins_795	217	*	2.97761	12.9453	2.1202	9.29165e-10	1.96207e-09
1	187687200	187687600	MergedBins_796	218	*	2.60541	13.005	2.31948	1.5196e-10	3.47254e-10
1	187707400	187707600	MergedBins_797	138	*	0.930504	8.2325	3.14525	1.42426e-11	3.62599e-11
1	187799400	187800000	MergedBins_798	374	*	5.95523	22.3113	1.90554	2.07067e-14	7.26537e-14
1	187813800	187814000	MergedBins_799	172	*	2.41931	10.2608	2.08447	7.21029e-08	1.29905e-07
1	187814400	187814800	MergedBins_800	269	*	3.34982	16.0474	2.26019	1.85928e-12	5.21698e-12
1	187817800	187818000	MergedBins_801	123	*	1.48881	7.33766	2.30116	2.05394e-06	3.21865e-06
1	187820600	187820800	MergedBins_802	119	*	7.07183	7.09904	0.00553938	0.94223	0.952266
1	187828600	187828800	MergedBins_803	162	*	0.744403	9.66424	3.6985	4.90313e-15	1.84353e-14
1	187830600	187830800	MergedBins_804	122	*	6.69963	7.278	0.119461	0.730907	0.750311
1	187843000	187843400	MergedBins_805	229	*	6.69963	13.6612	1.02793	6.6903e-05	9.29725e-05
1	187844600	187845000	MergedBins_806	177	*	1.86101	10.5591	2.50433	2.65747e-09	5.34477e-09
1	187854800	187855400	MergedBins_807	450	*	8.18844	26.8451	1.713	2.4892e-15	9.64502e-15
1	187855800	187856000	MergedBins_808	155	*	2.97761	9.24664	1.63477	8.16784e-06	1.21763e-05
1	187856400	187856800	MergedBins_809	330	*	2.04711	19.6864	3.26554	2.20306e-19	1.23816e-18
1	187857200	187857400	MergedBins_810	135	*	0.186101	8.05353	5.43546	2.49732e-15	9.6599e-15
1	187870800	187871000	MergedBins_811	212	*	6.51353	12.647	0.957287	0.000283734	0.000376766
1	187871600	187872000	MergedBins_812	318	*	13.9576	18.9705	0.442713	0.0192258	0.0225888
1	187883000	187883200	MergedBins_813	15	*	0.558303	0.894837	0.680577	0.588936	0.612084
1	187892200	187892600	MergedBins_814	381	*	5.21082	22.7288	2.12494	3.25774e-16	1.37046e-15
1	187924400	187925200	MergedBins_815	445	*	8.93284	26.5468	1.57135	7.63304e-14	2.52076e-13
1	187935400	187935800	MergedBins_816	227	*	2.97761	13.5419	2.1852	2.05652e-10	4.62462e-10
1	187938200	187939000	MergedBins_817	443	*	3.72202	26.4275	2.82788	2.26569e-23	1.71806e-22
1	187940200	187940600	MergedBins_818	151	*	0.744403	9.00802	3.59705	1.14712e-13	3.71707e-13
1	187945400	187945800	MergedBins_819	160	*	2.60541	9.54492	1.87322	9.36554e-07	1.51326e-06
1	187950000	187950400	MergedBins_820	189	*	6.32743	11.2749	0.833429	0.0021673	0.00270787
1	188082600	188082800	MergedBins_821	132	*	0.372202	7.87456	4.40304	1.29996e-13	4.16631e-13
1	188090200	188090600	MergedBins_822	224	*	4.46642	13.3629	1.58104	1.23971e-07	2.18269e-07
1	189744800	189745200	MergedBins_823	18	*	0.558303	1.0738	0.943612	0.444075	0.467947
1	189753600	189753800	MergedBins_824	128	*	6.51353	7.63594	0.229366	0.457466	0.481384
1	189813400	189813800	MergedBins_825	181	*	0.186101	10.7977	5.8585	9.45979e-21	5.94052e-20
1	189893000	189893400	MergedBins_826	229	*	45.4086	13.6612	-1.73288	2.52729e-43	4.70884e-42
1	189901200	189901600	MergedBins_827	149	*	1.86101	8.88871	2.25589	2.02498e-07	3.4955e-07
1	189915000	189915400	MergedBins_828	291	*	1.86101	17.3598	3.2216	4.05628e-17	1.85838e-16
1	189915800	189916000	MergedBins_829	150	*	4.09422	8.94837	1.12804	0.000617407	0.000800728
1	189916200	189916400	MergedBins_830	161	*	0.558303	9.60458	4.1046	5.77271e-16	2.36073e-15
1	189916800	189917000	MergedBins_831	139	*	1.11661	8.29215	2.89263	2.71845e-08	5.0467e-08
1	189919000	189919400	MergedBins_832	155	*	2.41931	9.24664	1.93433	9.14518e-07	1.4785e-06
1	190120800	190121000	MergedBins_833	153	*	18.424	9.12733	-1.01332	4.14266e-08	7.58321e-08
1	190122600	190123000	MergedBins_834	199	*	8.93284	11.8715	0.410311	0.0890548	0.0999024
1	190130400	190130800	MergedBins_835	152	*	2.41931	9.06768	1.90614	1.42561e-06	2.26426e-06
1	190137400	190137600	MergedBins_836	12	*	0.744403	0.715869	-0.0563884	1	1
1	190144200	190144600	MergedBins_837	223	*	20.4711	13.3032	-0.621811	0.000248267	0.000331189
1	190155000	190155200	MergedBins_838	142	*	8.00234	8.47112	0.0821315	0.809273	0.825877
1	190159800	190160000	MergedBins_839	161	*	0.372202	9.60458	4.68957	5.77656e-17	2.60997e-16
1	190866800	190867000	MergedBins_840	164	*	0.744403	9.78355	3.7162	3.18274e-15	1.21942e-14
1	190962400	190962600	MergedBins_841	133	*	0.744403	7.93422	3.41393	8.28605e-12	2.17071e-11
1	190967600	190968000	MergedBins_842	366	*	2.97761	21.834	2.87435	9.29888e-20	5.37602e-19
1	190974200	190974600	MergedBins_843	324	*	0.558303	19.3285	5.11354	1.12283e-34	1.58078e-33
1	192111800	192112200	MergedBins_844	255	*	6.32743	15.2122	1.26554	1.0001e-06	1.61293e-06
1	194771200	194771600	MergedBins_845	14	*	4.28032	0.835181	-2.35756	2.17626e-07	3.74518e-07
1	194961000	194961200	MergedBins_846	168	*	20.8433	10.0222	-1.05639	1.29622e-09	2.69483e-09
1	195104600	195105000	MergedBins_847	184	*	2.23321	10.9767	2.29725	5.09643e-09	1.0046e-08
1	195105200	195105600	MergedBins_848	207	*	1.11661	12.3487	3.46717	5.03609e-13	1.50549e-12
1	195106000	195106800	MergedBins_849	576	*	2.60541	34.3617	3.72122	4.29051e-35	6.16338e-34
10	3367800	3368200	MergedBins_850	217	*	10.4216	12.9453	0.312845	0.167886	0.184433
10	3369000	3369600	MergedBins_851	668	*	8.74674	39.8501	2.18776	3.98741e-28	4.07438e-27
10	3370000	3370600	MergedBins_852	725	*	5.58303	43.2504	2.9536	1.85294e-38	2.93841e-37
10	3370800	3371200	MergedBins_853	582	*	8.18844	34.7197	2.08409	1.2768e-23	9.83379e-23
10	3372200	3372800	MergedBins_854	423	*	19.5406	25.2344	0.368917	0.0213921	0.0250454
10	3373600	3373800	MergedBins_855	138	*	2.60541	8.2325	1.65982	2.26373e-05	3.25561e-05
10	3374000	3374800	MergedBins_856	389	*	14.702	23.2061	0.658495	0.00023602	0.000315336
10	3375400	3378800	MergedBins_857	4838	*	27.1707	288.615	3.40902	2.00465e-270	4.43814e-268
10	3379400	3380800	MergedBins_858	817	*	9.11894	48.7388	2.41813	3.62037e-37	5.53897e-36
10	3381200	3381800	MergedBins_859	356	*	3.90812	21.2375	2.44207	4.0811e-17	1.8686e-16
10	3382000	3383600	MergedBins_860	997	*	10.2355	59.4768	2.53874	7.64953e-47	1.62657e-45
10	3383800	3384200	MergedBins_861	231	*	3.53592	13.7805	1.96247	1.23569e-09	2.57373e-09
10	3385600	3386000	MergedBins_862	204	*	5.76913	12.1698	1.07688	0.000101644	0.000139381
10	3387600	3388000	MergedBins_863	177	*	2.04711	10.5591	2.36682	6.36771e-09	1.24736e-08
10	3389600	3390000	MergedBins_864	398	*	25.3097	23.743	-0.0921891	0.553183	0.576624
10	3391200	3391600	MergedBins_865	217	*	17.6796	12.9453	-0.449655	0.0132213	0.0157171
10	3393600	3394200	MergedBins_866	761	*	8.56064	45.398	2.40684	1.37624e-34	1.92794e-33
10	3394800	3395000	MergedBins_867	122	*	1.11661	7.278	2.70442	4.07227e-07	6.81589e-07
10	3396400	3396800	MergedBins_868	245	*	4.09422	14.6157	1.83586	1.54338e-09	3.1765e-09
10	3397200	3397400	MergedBins_869	155	*	0.558303	9.24664	4.04981	3.56316e-15	1.3601e-14
10	3398000	3398400	MergedBins_870	225	*	5.58303	13.4225	1.26554	4.51213e-06	6.86981e-06
10	3401000	3401400	MergedBins_871	238	*	11.7244	14.1981	0.276187	0.198441	0.216755
10	3402400	3402600	MergedBins_872	152	*	5.02472	9.06768	0.851689	0.00542255	0.00660617
10	3403200	3404000	MergedBins_873	330	*	4.65252	19.6864	2.08112	5.86922e-14	1.96179e-13
10	3404800	3405600	MergedBins_874	497	*	0.372202	29.6489	6.31575	1.26021e-56	3.41225e-55
10	3406800	3407000	MergedBins_875	123	*	4.46642	7.33766	0.716201	0.0314466	0.0363943
10	3408200	3408400	MergedBins_876	167	*	5.76913	9.96251	0.788157	0.00604231	0.00733746
10	3409400	3409800	MergedBins_877	323	*	10.7938	19.2688	0.836058	4.88573e-05	6.84936e-05
10	3412600	3412800	MergedBins_878	138	*	1.30271	8.2325	2.65982	8.09633e-08	1.45196e-07
10	3419000	3419600	MergedBins_879	271	*	1.48881	16.1667	3.4408	1.33792e-16	5.85294e-16
10	3419800	3420000	MergedBins_880	131	*	1.67491	7.81491	2.22215	1.39005e-06	2.20933e-06
10	3422800	3423400	MergedBins_881	427	*	3.34982	25.473	2.92682	4.24147e-23	3.15069e-22
10	3426000	3426600	MergedBins_882	240	*	5.39692	14.3174	1.40756	3.5648e-07	6.00033e-07
10	3427000	3427400	MergedBins_883	178	*	6.88573	10.6187	0.624929	0.0194545	0.0228457
10	3428000	3428200	MergedBins_884	138	*	1.11661	8.2325	2.88221	3.18862e-08	5.89128e-08
10	3430800	3431000	MergedBins_885	124	*	1.11661	7.39732	2.72788	2.96362e-07	5.04557e-07
10	3431800	3432400	MergedBins_886	307	*	3.72202	18.3143	2.29882	3.09773e-14	1.06603e-13
10	3432600	3434400	MergedBins_887	2149	*	15.2603	128.2	3.07055	8.91052e-114	6.4082e-112
10	3435400	3436000	MergedBins_888	451	*	7.25793	26.9048	1.89023	5.71636e-17	2.58795e-16
10	3436400	3436800	MergedBins_889	405	*	3.16371	24.1606	2.93296	5.21629e-22	3.57603e-21
10	3437400	3437800	MergedBins_890	297	*	5.02472	17.7178	1.81808	3.40663e-11	8.32019e-11
10	3438400	3438800	MergedBins_891	215	*	2.23321	12.826	2.52188	4.24527e-11	1.02487e-10
10	3439000	3440400	MergedBins_892	2407	*	22.5182	143.591	2.67281	2.20868e-115	1.61937e-113
10	3441000	3441600	MergedBins_893	446	*	2.04711	26.6065	3.70012	2.01892e-27	1.99962e-26
10	3450000	3450400	MergedBins_894	186	*	2.23321	11.096	2.31285	3.74962e-09	7.45895e-09
10	3450600	3450800	MergedBins_895	131	*	3.34982	7.81491	1.22215	0.000735134	0.000949051
10	3452200	3452800	MergedBins_896	508	*	35.1731	30.3051	-0.214909	0.0880435	0.098817
10	3455800	3456200	MergedBins_897	366	*	4.09422	21.834	2.41492	2.09798e-17	9.89898e-17
10	3456800	3458800	MergedBins_898	1441	*	7.07183	85.964	3.60358	3.57107e-84	1.80004e-82
10	3469600	3469800	MergedBins_899	160	*	0	9.54492	9.00251	6.52502e-20	3.82722e-19
10	3753800	3754000	MergedBins_900	177	*	1.11661	10.5591	3.24129	6.21735e-11	1.47541e-10
10	3865400	3865600	MergedBins_901	48	*	0.930504	2.86348	1.62168	0.00969188	0.0116046
10	7173400	7174200	MergedBins_902	365	*	16.7491	21.7744	0.378549	0.0291642	0.0338291
10	7181800	7182000	MergedBins_903	137	*	0.186101	8.17284	5.45668	1.58432e-15	6.22706e-15
10	7186600	7187000	MergedBins_904	322	*	18.0518	19.2092	0.0896532	0.631474	0.653407
10	7187400	7187800	MergedBins_905	50	*	2.04711	2.98279	0.543074	0.323306	0.346014
10	7906200	7906600	MergedBins_906	220	*	37.2202	13.1243	-1.50385	1.22647e-28	1.30397e-27
10	7917200	7918200	MergedBins_907	477	*	4.09422	28.4558	2.79706	7.17505e-25	6.04127e-24
10	8808200	8808400	MergedBins_908	123	*	1.67491	7.33766	2.13124	4.73287e-06	7.18651e-06
10	9494400	9494600	MergedBins_909	127	*	0.930504	7.57628	3.02541	2.90811e-10	6.42573e-10
10	9561400	9561600	MergedBins_910	162	*	0.558303	9.66424	4.11354	6.05142e-16	2.47023e-15
10	9571600	9572000	MergedBins_911	296	*	1.86101	17.6581	3.24617	1.83024e-17	8.6756e-17
10	9600400	9600800	MergedBins_912	215	*	3.16371	12.826	2.01938	2.78148e-09	5.5872e-09
10	9601800	9602000	MergedBins_913	129	*	0.372202	7.69559	4.36988	1.93332e-13	6.08393e-13
10	11292800	11293200	MergedBins_914	187	*	0.930504	11.1556	3.58362	8.12793e-17	3.62737e-16
10	12546800	12547200	MergedBins_915	20	*	0.372202	1.19312	1.68058	0.133516	0.147928
10	12570800	12571200	MergedBins_916	216	*	1.11661	12.8856	3.52857	1.18575e-13	3.8373e-13
10	12576600	12576800	MergedBins_917	127	*	1.11661	7.57628	2.76237	1.83927e-07	3.18614e-07
10	12589600	12590400	MergedBins_918	336	*	2.23321	20.0443	3.166	2.27609e-19	1.27794e-18
10	12601600	12601800	MergedBins_919	143	*	4.28032	8.53078	0.994959	0.002362	0.00294493
10	12615600	12615800	MergedBins_920	132	*	3.16371	7.87456	1.31558	0.000360805	0.000475472
10	12618200	12618400	MergedBins_921	130	*	0.372202	7.75525	4.38102	1.97705e-13	6.20942e-13
10	12676400	12676600	MergedBins_922	96	*	1.11661	5.72695	2.35865	2.47589e-05	3.54583e-05
10	12707000	12707200	MergedBins_923	156	*	0.372202	9.3063	4.64405	2.29811e-16	9.82133e-16
10	12711400	12711600	MergedBins_924	124	*	16.3769	7.39732	-1.14659	7.78533e-09	1.51637e-08
10	12718200	12718600	MergedBins_925	283	*	1.11661	16.8826	3.91834	2.47437e-18	1.27397e-17
10	12720800	12721000	MergedBins_926	121	*	30.8927	7.21835	-2.09753	9.48626e-40	1.56593e-38
10	12726200	12726400	MergedBins_927	240	*	55.458	14.3174	-1.95363	3.21554e-63	1.0463e-61
10	12727600	12728000	MergedBins_928	212	*	49.6889	12.647	-1.97413	1.09108e-57	3.04935e-56
10	12778000	12778400	MergedBins_929	201	*	5.02472	11.9908	1.25481	1.69841e-05	2.46741e-05
10	12821800	12822400	MergedBins_930	305	*	7.81624	18.195	1.219	1.73865e-07	3.01785e-07
10	12823200	12823600	MergedBins_931	185	*	2.04711	11.0363	2.4306	1.84845e-09	3.77957e-09
10	12856800	12857400	MergedBins_932	296	*	4.09422	17.6581	2.10867	8.45669e-13	2.46539e-12
10	12857600	12857800	MergedBins_933	132	*	2.04711	7.87456	1.94361	5.96921e-06	8.98645e-06
10	13097800	13098400	MergedBins_934	421	*	9.67724	25.1151	1.37589	2.33656e-11	5.81361e-11
10	13099400	13100000	MergedBins_935	379	*	4.83862	22.6095	2.22426	8.58672e-17	3.82155e-16
10	13100200	13100800	MergedBins_936	403	*	6.14133	24.0413	1.96889	6.46733e-16	2.63383e-15
10	13101800	13102200	MergedBins_937	205	*	3.16371	12.2294	1.95067	1.22361e-08	2.34161e-08
10	13117800	13118600	MergedBins_938	344	*	3.16371	20.5216	2.69745	7.35994e-18	3.59901e-17
10	13129800	13131600	MergedBins_939	1848	*	105.147	110.244	0.0682911	0.33652	0.359441
10	13208200	13208800	MergedBins_940	584	*	9.49114	34.839	1.87605	2.08761e-21	1.37602e-20
10	13213200	13213600	MergedBins_941	343	*	34.8009	20.4619	-0.766181	4.61061e-09	9.11865e-09
10	13258000	13258200	MergedBins_942	128	*	1.86101	7.63594	2.03672	4.9633e-06	7.52223e-06
10	13280200	13281400	MergedBins_943	969	*	9.86334	57.8064	2.55108	9.56557e-46	1.97089e-44
10	13283400	13284000	MergedBins_944	788	*	9.67724	47.0087	2.28026	3.75418e-34	5.1883e-33
10	13284800	13285200	MergedBins_945	189	*	9.49114	11.2749	0.248466	0.308904	0.331165
10	13293400	13293800	MergedBins_946	254	*	1.30271	15.1526	3.53998	7.37653e-16	2.99168e-15
10	13303000	13303800	MergedBins_947	453	*	5.39692	27.0241	2.32404	1.45558e-20	8.97592e-20
10	13304200	13304600	MergedBins_948	224	*	5.02472	13.3629	1.41112	8.59295e-07	1.39314e-06
10	13307400	13307800	MergedBins_949	95	*	0.558303	5.6673	3.34354	1.8366e-08	3.46483e-08
10	13311200	13311600	MergedBins_950	200	*	2.41931	11.9312	2.30207	1.02404e-09	2.14835e-09
10	13313600	13313800	MergedBins_951	148	*	2.04711	8.82905	2.10867	5.38513e-07	8.91155e-07
10	13314200	13314600	MergedBins_952	223	*	0.186101	13.3032	6.15955	8.80596e-26	7.90367e-25
10	13318200	13318400	MergedBins_953	123	*	1.86101	7.33766	1.97924	1.05343e-05	1.55685e-05
10	13320000	13320400	MergedBins_954	185	*	9.11894	11.0363	0.275321	0.265552	0.286869
10	13375200	13375600	MergedBins_955	304	*	20.6572	18.1354	-0.187839	0.26372	0.284944
10	13402200	13402600	MergedBins_956	183	*	5.76913	10.917	0.920153	0.00111372	0.00141787
10	13405000	13405200	MergedBins_957	120	*	2.79151	7.15869	1.35865	0.000526513	0.000686078
10	13439400	13439800	MergedBins_958	216	*	1.11661	12.8856	3.52857	1.18575e-13	3.8373e-13
10	13465000	13465200	MergedBins_959	134	*	1.86101	7.99387	2.10281	2.00144e-06	3.13996e-06
10	13471800	13472200	MergedBins_960	360	*	2.23321	21.4761	3.26554	5.03366e-21	3.22377e-20
10	13509600	13510000	MergedBins_961	240	*	0.930504	14.3174	3.94361	9.58634e-23	6.93842e-22
10	13747800	13748000	MergedBins_962	126	*	0.372202	7.51663	4.33593	4.73498e-13	1.41924e-12
10	13751800	13752000	MergedBins_963	122	*	3.16371	7.278	1.20192	0.00131325	0.0016625
10	13799200	13799400	MergedBins_964	157	*	0.930504	9.36596	3.33134	1.29241e-13	4.15152e-13
10	13825000	13825200	MergedBins_965	167	*	2.04711	9.96251	2.28292	2.96797e-08	5.49546e-08
10	13996600	13997000	MergedBins_966	170	*	0.930504	10.1415	3.44611	6.37535e-15	2.36091e-14
10	14000000	14000200	MergedBins_967	200	*	1.67491	11.9312	2.83258	2.88232e-11	7.10108e-11
10	14083400	14083800	MergedBins_968	296	*	2.41931	17.6581	2.86766	3.31509e-16	1.39096e-15
10	14088600	14088800	MergedBins_969	151	*	6.51353	9.00802	0.467771	0.0988613	0.110486
10	17822400	17822800	MergedBins_970	146	*	0.558303	8.70974	3.96351	3.21513e-14	1.10173e-13
10	17906200	17906600	MergedBins_971	221	*	1.11661	13.1839	3.56159	5.30831e-14	1.77799e-13
10	17913200	17913600	MergedBins_972	197	*	0.558303	11.7522	4.39574	4.61885e-20	2.73617e-19
10	18070600	18071000	MergedBins_973	220	*	2.04711	13.1243	2.68058	7.8987e-12	2.0784e-11
10	18072000	18072200	MergedBins_974	130	*	0.372202	7.75525	4.38102	1.97705e-13	6.20942e-13
10	18084400	18084600	MergedBins_975	75	*	1.11661	4.47418	2.00251	0.000647062	0.000838515
10	18090400	18090600	MergedBins_976	126	*	1.11661	7.51663	2.75097	2.15638e-07	3.71267e-07
10	18349200	18349400	MergedBins_977	122	*	4.46642	7.278	0.704424	0.0346973	0.0400334
10	18441600	18442000	MergedBins_978	174	*	0.744403	10.3801	3.80159	2.24576e-16	9.61581e-16
10	18442400	18442600	MergedBins_979	119	*	0.372202	7.09904	4.25347	2.87129e-12	7.88992e-12
10	18502200	18502400	MergedBins_980	126	*	0.930504	7.51663	3.014	2.74744e-10	6.09217e-10
10	18516800	18517000	MergedBins_981	132	*	1.67491	7.87456	2.23312	1.19201e-06	1.90718e-06
10	18517600	18518000	MergedBins_982	184	*	3.90812	10.9767	1.48989	4.14383e-06	6.32185e-06
10	18856400	18857000	MergedBins_983	314	*	53.2248	18.7319	-1.5066	1.84096e-40	3.13046e-39
10	19864200	19864800	MergedBins_984	519	*	3.34982	30.9613	3.20831	2.10887e-29	2.33444e-28
10	19865000	19865200	MergedBins_985	175	*	3.34982	10.4398	1.63994	1.93952e-06	3.04662e-06
10	19865800	19866200	MergedBins_986	287	*	5.02472	17.1212	1.76867	1.42662e-10	3.26402e-10
10	20016600	20016800	MergedBins_987	139	*	0.558303	8.29215	3.89263	1.89383e-13	5.96963e-13
10	20045200	20045400	MergedBins_988	5	*	0.558303	0.298279	-0.904385	0.411599	0.43535
10	20114200	20114800	MergedBins_989	335	*	1.86101	19.9847	3.42474	3.65265e-20	2.18443e-19
10	20115000	20115400	MergedBins_990	163	*	2.97761	9.72389	1.70738	2.62127e-06	4.07164e-06
10	24165600	24166200	MergedBins_991	48	*	0.558303	2.86348	2.35865	0.000910778	0.001167
10	25195600	25195800	MergedBins_992	16	*	0.930504	0.954492	0.036721	1	1
10	25363600	25363800	MergedBins_993	121	*	1.48881	7.21835	2.27751	2.79947e-06	4.3371e-06
10	25365000	25365400	MergedBins_994	182	*	3.34982	10.8574	1.69652	7.202e-07	1.17715e-06
10	25370800	25371000	MergedBins_995	155	*	2.79151	9.24664	1.72788	4.04024e-06	6.17131e-06
10	25427000	25427200	MergedBins_996	170	*	4.28032	10.1415	1.24448	8.84866e-05	0.000121842
10	25491200	25491400	MergedBins_997	137	*	1.48881	8.17284	2.45668	2.32506e-07	3.99031e-07
10	26787400	26787600	MergedBins_998	149	*	0.744403	8.88871	3.57782	1.71447e-13	5.42664e-13
10	26866000	26866400	MergedBins_999	176	*	4.65252	10.4994	1.17422	0.000127202	0.000173458
10	26897200	26897400	MergedBins_1000	26	*	1.86101	1.55105	-0.262839	0.76729	0.785447
10	27051200	27051400	MergedBins_1001	1	*	1.11661	0.0596558	-4.22631	0.00113415	0.00144289
10	27544400	27544800	MergedBins_1002	183	*	2.04711	10.917	2.41492	2.51932e-09	5.07596e-09
10	27575600	27575800	MergedBins_1003	153	*	4.83862	9.12733	0.915597	0.00312536	0.00386342
10	27585200	27585600	MergedBins_1004	172	*	12.0966	10.2608	-0.237454	0.290978	0.312809
10	28077600	28078000	MergedBins_1005	181	*	1.86101	10.7977	2.53657	1.42447e-09	2.95114e-09
10	28078200	28078600	MergedBins_1006	231	*	1.86101	13.7805	2.88847	5.51732e-13	1.64023e-12
10	28100200	28100600	MergedBins_1007	226	*	2.41931	13.4822	2.47839	1.86578e-11	4.69606e-11
10	28106200	28106600	MergedBins_1008	215	*	16.9352	12.826	-0.400953	0.030558	0.0354023
10	28108400	28110000	MergedBins_1009	1103	*	9.67724	65.8003	2.76543	3.94768e-55	1.03179e-53
10	28110400	28110600	MergedBins_1010	131	*	0.930504	7.81491	3.07014	7.7647e-11	1.81966e-10
10	28117600	28118000	MergedBins_1011	233	*	26.6124	13.8998	-0.937036	7.1802e-10	1.5285e-09
10	28118400	28118800	MergedBins_1012	217	*	6.88573	12.9453	0.910747	0.000407267	0.00053514
10	28129600	28130000	MergedBins_1013	188	*	3.53592	11.2153	1.66531	6.20668e-07	1.02231e-06
10	28131800	28132000	MergedBins_1014	120	*	1.48881	7.15869	2.26554	3.26773e-06	5.02875e-06
10	28136200	28136800	MergedBins_1015	315	*	11.1661	18.7916	0.750967	0.000235929	0.000315252
10	28149400	28149600	MergedBins_1016	129	*	1.67491	7.69559	2.19995	1.88965e-06	2.97076e-06
10	28150000	28150400	MergedBins_1017	154	*	1.11661	9.18699	3.04047	2.47498e-09	4.99375e-09
10	28159200	28159400	MergedBins_1018	176	*	0.930504	10.4994	3.49615	1.11311e-15	4.43946e-15
10	28160400	28160800	MergedBins_1019	163	*	1.30271	9.72389	2.90002	1.53725e-09	3.16446e-09
10	28175600	28175800	MergedBins_1020	135	*	2.97761	8.05353	1.43546	0.000130525	0.000177819
10	28215200	28215400	MergedBins_1021	137	*	4.09422	8.17284	0.99725	0.00290746	0.00360274
10	28235400	28235600	MergedBins_1022	98	*	1.86101	5.84627	1.65143	0.000419804	0.000550844
10	28294800	28295200	MergedBins_1023	245	*	2.23321	14.6157	2.71032	3.93145e-13	1.19557e-12
10	28314000	28314200	MergedBins_1024	137	*	1.86101	8.17284	2.13475	1.26855e-06	2.02505e-06
10	28327200	28327400	MergedBins_1025	143	*	1.11661	8.53078	2.93356	1.43568e-08	2.73499e-08
10	28389200	28390000	MergedBins_1026	370	*	6.69963	22.0726	1.72011	6.81306e-13	2.01378e-12
10	28393200	28393400	MergedBins_1027	136	*	1.48881	8.11319	2.44611	2.71807e-07	4.64434e-07
10	28422000	28422400	MergedBins_1028	158	*	0.558303	9.42561	4.07747	1.41665e-15	5.60061e-15
10	29099400	29099800	MergedBins_1029	0	*	0	0	0	1	1
10	30189200	30189600	MergedBins_1030	2	*	0	0.119312	2.68058	1	1
10	30584200	30584400	MergedBins_1031	42	*	0.558303	2.50554	2.166	0.00456322	0.00558943
10	30612800	30613000	MergedBins_1032	7	*	0.372202	0.41759	0.166004	1	1
10	31581400	31581800	MergedBins_1033	247	*	0.930504	14.735	3.98509	1.6199e-23	1.24086e-22
10	31585200	31585400	MergedBins_1034	124	*	0.930504	7.39732	2.99092	4.19112e-10	9.11614e-10
10	33068800	33069200	MergedBins_1035	183	*	1.11661	10.917	3.28939	2.37484e-11	5.90364e-11
10	33086000	33086400	MergedBins_1036	120	*	1.48881	7.15869	2.26554	3.26773e-06	5.02875e-06
10	33092400	33092800	MergedBins_1037	237	*	3.53592	14.1384	1.99946	5.09206e-10	1.0989e-09
10	33093200	33093600	MergedBins_1038	221	*	1.11661	13.1839	3.56159	5.30831e-14	1.77799e-13
10	33098400	33098600	MergedBins_1039	162	*	1.30271	9.66424	2.89114	1.80219e-09	3.68968e-09
10	33121000	33121200	MergedBins_1040	141	*	1.11661	8.41146	2.91324	1.97568e-08	3.71419e-08
10	33123400	33123800	MergedBins_1041	235	*	0.372202	14.0191	5.23517	1.00466e-25	8.98856e-25
10	33157000	33157200	MergedBins_1042	129	*	117.244	7.69559	-3.92933	0	0
10	33159000	33159400	MergedBins_1043	167	*	1.11661	9.96251	3.15739	3.08842e-10	6.80283e-10
10	33207600	33208000	MergedBins_1044	153	*	5.76913	9.12733	0.661841	0.0235951	0.027559
10	33243800	33244000	MergedBins_1045	90	*	6.69963	5.36902	-0.319423	0.307187	0.329417
10	33247000	33247200	MergedBins_1046	123	*	0.372202	7.33766	4.30116	1.18779e-12	3.40389e-12
10	33400600	33400800	MergedBins_1047	121	*	0.186101	7.21835	5.27751	1.00859e-13	3.29036e-13
10	33402000	33402200	MergedBins_1048	139	*	1.11661	8.29215	2.89263	2.71845e-08	5.0467e-08
10	34014400	34014600	MergedBins_1049	27	*	0.186101	1.61071	3.11354	0.00696914	0.00842491
10	37135000	37135400	MergedBins_1050	221	*	17.3074	13.1839	-0.392607	0.0321377	0.0371523
10	39028600	39028800	MergedBins_1051	129	*	7.63013	7.69559	0.0123244	0.966662	0.975039
10	39030400	39030600	MergedBins_1052	210	*	19.5406	12.5277	-0.641351	0.000229244	0.000306537
10	39033000	39033200	MergedBins_1053	163	*	18.0518	9.72389	-0.892536	1.36934e-06	2.18039e-06
10	39089600	39090000	MergedBins_1054	269	*	2.97761	16.0474	2.43011	3.37374e-13	1.03121e-12
10	39102600	39102800	MergedBins_1055	119	*	0.744403	7.09904	3.25347	2.58856e-10	5.76023e-10
10	39430000	39430200	MergedBins_1056	7	*	0.186101	0.41759	1.166	0.688892	0.710021
10	39437000	39437200	MergedBins_1057	21	*	1.30271	1.25277	-0.0563884	0.895909	0.908951
10	39465200	39465600	MergedBins_1058	388	*	7.63013	23.1464	1.60101	1.74354e-12	4.92404e-12
10	39497600	39498200	MergedBins_1059	95	*	2.04711	5.6673	1.46907	0.00126456	0.00160285
10	39664800	39665200	MergedBins_1060	177	*	2.23321	10.5591	2.24129	1.48796e-08	2.82934e-08
10	39665800	39666000	MergedBins_1061	91	*	0.744403	5.42868	2.86644	2.25331e-07	3.87424e-07
10	39678200	39678600	MergedBins_1062	157	*	2.41931	9.36596	1.95283	6.79691e-07	1.11401e-06
10	39759800	39760000	MergedBins_1063	134	*	1.67491	7.99387	2.25481	8.76252e-07	1.41744e-06
10	39763400	39763600	MergedBins_1064	133	*	1.30271	7.93422	2.60658	1.78271e-07	3.09099e-07
10	39791600	39792000	MergedBins_1065	276	*	4.09422	16.465	2.00774	1.65364e-11	4.17796e-11
10	39845400	39845800	MergedBins_1066	157	*	2.97761	9.36596	1.65327	6.15572e-06	9.25489e-06
10	40097200	40097800	MergedBins_1067	357	*	3.53592	21.2971	2.5905	5.9714e-18	2.9391e-17
10	40137600	40137800	MergedBins_1068	177	*	0.744403	10.5591	3.82625	9.39132e-17	4.16323e-16
10	40660600	40660800	MergedBins_1069	77	*	2.04711	4.59349	1.166	0.0142103	0.0168485
10	40676400	40676800	MergedBins_1070	223	*	1.48881	13.3032	3.15955	2.86147e-13	8.86146e-13
10	41231400	41231600	MergedBins_1071	197	*	0.372202	11.7522	4.9807	4.08887e-21	2.63362e-20
10	41235600	41235800	MergedBins_1072	132	*	1.11661	7.87456	2.81808	8.29795e-08	1.486e-07
10	41246800	41247000	MergedBins_1073	176	*	0.744403	10.4994	3.81808	1.45133e-16	6.33189e-16
10	41287400	41287600	MergedBins_1074	138	*	0.558303	8.2325	3.88221	3.11481e-13	9.56728e-13
10	41523000	41523400	MergedBins_1075	159	*	10.6077	9.48527	-0.161358	0.518598	0.542376
10	41524000	41524200	MergedBins_1076	164	*	10.0494	9.78355	-0.0386864	0.926751	0.937966
10	41526800	41527000	MergedBins_1077	161	*	6.14133	9.60458	0.645172	0.0228387	0.0266975
10	41528600	41529800	MergedBins_1078	997	*	48.014	59.4768	0.308872	0.00238088	0.00296782
10	41530600	41531000	MergedBins_1079	336	*	17.4935	20.0443	0.196378	0.266457	0.287791
10	41816400	41816600	MergedBins_1080	163	*	1.67491	9.72389	2.53745	9.70312e-09	1.87599e-08
10	42229800	42230000	MergedBins_1081	147	*	0.186101	8.7694	5.55832	9.86414e-17	4.35743e-16
10	42240000	42240200	MergedBins_1082	140	*	5.02472	8.35181	0.733045	0.0186113	0.0218851
10	42771800	42772200	MergedBins_1083	10	*	0.744403	0.596558	-0.319423	0.755534	0.773833
10	43052000	43052200	MergedBins_1084	167	*	1.30271	9.96251	2.935	8.13541e-10	1.72307e-09
10	43138600	43139000	MergedBins_1085	184	*	0.558303	10.9767	4.29725	1.72672e-18	9.00528e-18
10	43330000	43330200	MergedBins_1086	143	*	6.51353	8.53078	0.389237	0.177792	0.194823
10	45238600	45238800	MergedBins_1087	125	*	0.930504	7.45697	3.00251	4.32144e-10	9.37612e-10
10	45283600	45284200	MergedBins_1088	269	*	3.72202	16.0474	2.10818	9.59579e-12	2.49991e-11
10	45286000	45286600	MergedBins_1089	450	*	5.58303	26.8451	2.26554	5.31633e-20	3.14276e-19
10	45295000	45295400	MergedBins_1090	219	*	3.16371	13.0646	2.04597	1.53319e-09	3.15842e-09
10	45296600	45296800	MergedBins_1091	119	*	0.930504	7.09904	2.93154	1.47081e-09	3.03712e-09
10	45297400	45297800	MergedBins_1092	245	*	2.79151	14.6157	2.3884	5.68637e-12	1.5218e-11
10	45346200	45346400	MergedBins_1093	132	*	10.6077	7.87456	-0.429847	0.0715406	0.080833
10	45347800	45348000	MergedBins_1094	133	*	10.7938	7.93422	-0.444049	0.0601893	0.068425
10	45349800	45350200	MergedBins_1095	354	*	8.00234	21.1181	1.39999	6.05753e-10	1.29882e-09
10	45350600	45350800	MergedBins_1096	137	*	2.23321	8.17284	1.87172	6.10836e-06	9.18613e-06
10	45351200	45352200	MergedBins_1097	798	*	10.4216	47.6053	2.19154	2.28951e-33	3.06653e-32
10	45352400	45353200	MergedBins_1098	545	*	6.69963	32.5124	2.27884	4.72491e-24	3.7177e-23
10	45357400	45357600	MergedBins_1099	126	*	6.14133	7.51663	0.291535	0.345857	0.369099
10	45358000	45358200	MergedBins_1100	133	*	2.41931	7.93422	1.71349	2.2832e-05	3.27869e-05
10	45359200	45360000	MergedBins_1101	457	*	5.58303	27.2627	2.28781	1.84508e-20	1.13099e-19
10	45360600	45361600	MergedBins_1102	991	*	9.67724	59.1189	2.61095	1.32763e-47	2.91639e-46
10	45362200	45363200	MergedBins_1103	669	*	2.60541	39.9097	3.93716	1.50664e-41	2.6539e-40
10	45364400	45364800	MergedBins_1104	406	*	5.21082	24.2202	2.21663	7.68383e-18	3.74442e-17
10	45369200	45369600	MergedBins_1105	271	*	30.1483	16.1667	-0.899052	2.59927e-10	5.78292e-10
10	45370800	45371400	MergedBins_1106	215	*	26.4263	12.826	-1.04291	1.28949e-11	3.30299e-11
10	45613800	45614000	MergedBins_1107	128	*	2.04711	7.63594	1.89922	1.08217e-05	1.59723e-05
10	50771800	50772000	MergedBins_1108	169	*	0.930504	10.0818	3.4376	6.33051e-15	2.35357e-14
10	51492000	51492400	MergedBins_1109	1	*	1.11661	0.0596558	-4.22631	0.00113415	0.00144289
10	52237200	52237600	MergedBins_1110	8	*	0.558303	0.477246	-0.226313	0.734634	0.753794
10	52376200	52376600	MergedBins_1111	16	*	2.04711	0.954492	-1.10078	0.076524	0.0863429
10	53303200	53303400	MergedBins_1112	131	*	3.16371	7.81491	1.30461	0.00041134	0.000540113
10	53308800	53309000	MergedBins_1113	119	*	0.744403	7.09904	3.25347	2.58856e-10	5.76023e-10
10	53337600	53337800	MergedBins_1114	136	*	13.7715	8.11319	-0.763341	0.000288655	0.00038321
10	53343600	53344600	MergedBins_1115	1114	*	74.6264	66.4565	-0.167276	0.0497391	0.0569289
10	53344800	53345200	MergedBins_1116	276	*	55.8303	16.465	-1.76165	2.60118e-54	6.7208e-53
10	53348000	53348400	MergedBins_1117	192	*	6.51353	11.4539	0.814329	0.00240803	0.00300067
10	53353400	53353800	MergedBins_1118	227	*	38.5229	13.5419	-1.50829	9.89933e-30	1.11997e-28
10	53366400	53366600	MergedBins_1119	135	*	3.53592	8.05353	1.18754	0.000776501	0.0010004
10	53373000	53373400	MergedBins_1120	180	*	2.23321	10.738	2.26554	9.40572e-09	1.82036e-08
10	53374200	53374400	MergedBins_1121	71	*	9.30504	4.23556	-1.13546	1.97313e-05	2.85002e-05
10	53375400	53375800	MergedBins_1122	152	*	14.702	9.06768	-0.697204	0.000578315	0.000751583
10	53566200	53566800	MergedBins_1123	440	*	0.930504	26.2485	4.81808	1.2461e-45	2.55349e-44
10	53567400	53567600	MergedBins_1124	120	*	0.930504	7.15869	2.94361	1.55395e-09	3.19186e-09
10	53568400	53568800	MergedBins_1125	236	*	5.95523	14.0788	1.24129	3.51256e-06	5.39376e-06
10	53960000	53960200	MergedBins_1126	191	*	1.11661	11.3943	3.35112	6.57739e-12	1.7503e-11
10	56386800	56387000	MergedBins_1127	127	*	6.14133	7.57628	0.30294	0.324887	0.347574
10	58261600	58262000	MergedBins_1128	172	*	0.558303	10.2608	4.19995	4.0052e-17	1.83757e-16
10	58329000	58329200	MergedBins_1129	141	*	8.00234	8.41146	0.0719357	0.841262	0.856046
10	58331200	58331600	MergedBins_1130	67	*	3.90812	3.99694	0.0324209	0.972512	0.980413
10	58332000	58332200	MergedBins_1131	130	*	9.49114	7.75525	-0.291408	0.255167	0.276098
10	58335600	58335800	MergedBins_1132	34	*	0.930504	2.0283	1.12418	0.132735	0.147149
10	58458200	58458600	MergedBins_1133	255	*	2.60541	15.2122	2.54565	5.04817e-13	1.50831e-12
10	59212600	59212800	MergedBins_1134	21	*	1.11661	1.25277	0.166004	0.980637	0.987899
10	59218600	59219000	MergedBins_1135	207	*	11.7244	12.3487	0.0748562	0.772069	0.78998
10	59363600	59364000	MergedBins_1136	226	*	0.372202	13.4822	5.17883	1.7098e-24	1.39389e-23
10	59530000	59530200	MergedBins_1137	130	*	2.60541	7.75525	1.57366	7.01411e-05	9.73287e-05
10	59577400	59577600	MergedBins_1138	145	*	14.1437	8.65009	-0.709369	0.000606358	0.00078676
10	59593600	59593800	MergedBins_1139	152	*	7.07183	9.06768	0.358649	0.19719	0.215451
10	59606600	59606800	MergedBins_1140	123	*	1.67491	7.33766	2.13124	4.73287e-06	7.18651e-06
10	60016800	60017000	MergedBins_1141	161	*	1.67491	9.60458	2.51964	1.32638e-08	2.5336e-08
10	60770000	60770400	MergedBins_1142	205	*	3.16371	12.2294	1.95067	1.22361e-08	2.34161e-08
10	61432800	61433600	MergedBins_1143	532	*	2.79151	31.7369	3.50704	1.3338e-31	1.6495e-30
10	62282600	62283000	MergedBins_1144	326	*	5.76913	19.4478	1.75318	9.81714e-12	2.55522e-11
10	62331600	62331800	MergedBins_1145	135	*	0.372202	8.05353	4.43546	5.03696e-14	1.69212e-13
10	62622200	62622600	MergedBins_1146	156	*	1.67491	9.3063	2.47413	2.89445e-08	5.36198e-08
10	62806200	62806400	MergedBins_1147	141	*	6.69963	8.41146	0.328275	0.256999	0.278001
10	63467400	63468000	MergedBins_1148	257	*	2.41931	15.3315	2.66383	1.50168e-13	4.78562e-13
10	63490600	63490800	MergedBins_1149	163	*	0.372202	9.72389	4.70738	3.82672e-17	1.75926e-16
10	63491600	63491800	MergedBins_1150	122	*	1.11661	7.278	2.70442	4.07227e-07	6.81589e-07
10	63505000	63505200	MergedBins_1151	144	*	3.53592	8.59043	1.28065	0.000246325	0.000328637
10	63507000	63507400	MergedBins_1152	193	*	6.88573	11.5136	0.741653	0.00481411	0.00588715
10	63527000	63527200	MergedBins_1153	15	*	0.186101	0.894837	2.26554	0.141024	0.155956
10	63527600	63527800	MergedBins_1154	139	*	0.372202	8.29215	4.47759	2.1769e-14	7.62624e-14
10	63538400	63538600	MergedBins_1155	268	*	5.02472	15.9877	1.66985	2.09844e-09	4.26526e-09
10	63541000	63541400	MergedBins_1156	165	*	0.186101	9.8432	5.72497	1.06348e-18	5.64803e-18
10	63542200	63542600	MergedBins_1157	211	*	3.34982	12.5874	1.90982	1.08782e-08	2.09207e-08
10	63585000	63585200	MergedBins_1158	148	*	1.86101	8.82905	2.24617	2.36098e-07	4.04888e-07
10	63585800	63586400	MergedBins_1159	330	*	10.9799	19.6864	0.842328	3.6206e-05	5.12219e-05
10	63590600	63591200	MergedBins_1160	223	*	15.2603	13.3032	-0.198003	0.318884	0.341346
10	63591600	63592000	MergedBins_1161	45	*	3.53592	2.68451	-0.397425	0.387432	0.411137
10	63595600	63596000	MergedBins_1162	170	*	7.44403	10.1415	0.446112	0.0917666	0.102832
10	63598000	63598400	MergedBins_1163	121	*	10.9799	7.21835	-0.605131	0.0100521	0.0120231
10	63601800	63602800	MergedBins_1164	662	*	5.58303	39.4921	2.82245	3.52729e-34	4.88071e-33
10	63604800	63605200	MergedBins_1165	557	*	6.51353	33.2283	2.3509	3.29948e-25	2.84168e-24
10	63608400	63608800	MergedBins_1166	279	*	3.16371	16.644	2.39531	1.72592e-13	5.45866e-13
10	63609200	63610000	MergedBins_1167	419	*	20.8433	24.9958	0.262101	0.0969828	0.108441
10	63610400	63610800	MergedBins_1168	266	*	5.39692	15.8684	1.55595	1.07532e-08	2.07157e-08
10	63613000	63613600	MergedBins_1169	338	*	8.18844	20.1637	1.3001	8.64361e-09	1.67775e-08
10	63614200	63615000	MergedBins_1170	604	*	22.8904	36.0321	0.654539	4.5926e-06	6.98572e-06
10	63618200	63619200	MergedBins_1171	480	*	10.7938	28.6348	1.40756	4.17208e-13	1.26394e-12
10	63620200	63620600	MergedBins_1172	189	*	1.67491	11.2749	2.75097	1.6357e-10	3.72577e-10
10	63621200	63622000	MergedBins_1173	967	*	18.9823	57.6871	1.6036	4.09208e-29	4.45982e-28
10	63622400	63623400	MergedBins_1174	483	*	10.4216	28.8137	1.46717	8.11463e-14	2.66887e-13
10	63623600	63624600	MergedBins_1175	388	*	5.58303	23.1464	2.05167	5.67532e-16	2.32342e-15
10	63626000	63626200	MergedBins_1176	180	*	7.07183	10.738	0.602575	0.0227481	0.0265999
10	63627600	63628200	MergedBins_1177	307	*	6.14133	18.3143	1.57635	5.5634e-10	1.19673e-09
10	63629800	63630400	MergedBins_1178	378	*	19.7267	22.5499	0.192971	0.244051	0.264553
10	63630800	63631400	MergedBins_1179	985	*	37.0341	58.7609	0.666004	2.53872e-09	5.11321e-09
10	63632600	63633400	MergedBins_1180	1196	*	6.69963	71.3483	3.41273	3.57993e-68	1.30812e-66
10	63634400	63635200	MergedBins_1181	358	*	11.7244	21.3568	0.865185	1.08913e-05	1.60708e-05
10	63635400	63635800	MergedBins_1182	233	*	2.23321	13.8998	2.63787	2.56959e-12	7.12682e-12
10	63636000	63638200	MergedBins_1183	1990	*	16.0047	118.715	2.89094	2.55219e-101	1.66571e-99
10	63639000	63639400	MergedBins_1184	240	*	1.67491	14.3174	3.09561	5.07549e-14	1.70405e-13
10	63639600	63640600	MergedBins_1185	960	*	9.86334	57.2695	2.53762	3.80879e-45	7.55801e-44
10	63641000	63641400	MergedBins_1186	363	*	2.60541	21.655	3.05512	2.21512e-20	1.3454e-19
10	63641800	63642200	MergedBins_1187	187	*	1.30271	11.1556	3.09819	3.35618e-11	8.20408e-11
10	63644400	63644800	MergedBins_1188	221	*	6.88573	13.1839	0.937098	0.000263456	0.000350705
10	63646600	63648400	MergedBins_1189	1132	*	23.8209	67.5303	1.50331	2.18648e-31	2.68928e-30
10	63649000	63650400	MergedBins_1190	2040	*	19.5406	121.698	2.63876	4.34585e-97	2.6961e-95
10	63652600	63653600	MergedBins_1191	541	*	18.6101	32.2738	0.794278	3.85465e-07	6.46987e-07
10	63655200	63655400	MergedBins_1192	123	*	8.56064	7.33766	-0.222398	0.421895	0.445614
10	63671200	63672000	MergedBins_1193	768	*	16.9352	45.8156	1.43582	1.24922e-20	7.75421e-20
10	63672400	63673400	MergedBins_1194	1070	*	21.9599	63.8317	1.5394	1.38116e-30	1.63295e-29
10	63674200	63674600	MergedBins_1195	373	*	5.02472	22.2516	2.14679	4.79637e-16	1.9801e-15
10	63674800	63676200	MergedBins_1196	535	*	10.6077	31.9158	1.58915	1.41161e-16	6.16101e-16
10	63679600	63679800	MergedBins_1197	120	*	3.53592	7.15869	1.01761	0.00484137	0.00591601
10	63682200	63682400	MergedBins_1198	136	*	0.186101	8.11319	5.44611	2.69836e-15	1.03877e-14
10	63686400	63686600	MergedBins_1199	127	*	4.28032	7.57628	0.823772	0.0139371	0.0165351
10	63691200	63691400	MergedBins_1200	121	*	3.34982	7.21835	1.10759	0.00256779	0.00319376
10	63692200	63692400	MergedBins_1201	159	*	3.72202	9.48527	1.3496	6.30407e-05	8.77024e-05
10	63693600	63694200	MergedBins_1202	317	*	1.48881	18.9109	3.66699	8.45007e-20	4.89783e-19
10	63694400	63694800	MergedBins_1203	372	*	7.63013	22.1919	1.54026	1.54973e-11	3.92772e-11
10	63695800	63696200	MergedBins_1204	245	*	6.32743	14.6157	1.20782	3.49176e-06	5.36255e-06
10	63698400	63699000	MergedBins_1205	403	*	2.41931	24.0413	3.31285	1.46249e-23	1.1218e-22
10	63699600	63700400	MergedBins_1206	488	*	6.88573	29.112	2.07993	5.40827e-20	3.19543e-19
10	63700600	63701600	MergedBins_1207	680	*	7.63013	40.5659	2.41049	4.21726e-31	5.10365e-30
10	63703600	63703800	MergedBins_1208	178	*	18.9823	10.6187	-0.838043	2.95426e-06	4.56814e-06
10	63706600	63707000	MergedBins_1209	186	*	2.23321	11.096	2.31285	3.74962e-09	7.45895e-09
10	63707400	63707600	MergedBins_1210	151	*	7.25793	9.00802	0.311652	0.262548	0.283732
10	63710000	63711000	MergedBins_1211	1769	*	14.702	105.531	2.84359	3.23994e-89	1.76725e-87
10	63711400	63712600	MergedBins_1212	1225	*	12.841	73.0783	2.50869	1.18431e-56	3.21444e-55
10	63712800	63713200	MergedBins_1213	213	*	6.14133	12.7067	1.04896	9.68278e-05	0.000132954
10	63715000	63715600	MergedBins_1214	258	*	7.63013	15.3912	1.01232	2.7609e-05	3.9405e-05
10	63716600	63717000	MergedBins_1215	220	*	5.58303	13.1243	1.23312	8.47287e-06	1.2606e-05
10	63717600	63718000	MergedBins_1216	152	*	1.48881	9.06768	2.60658	2.21499e-08	4.14819e-08
10	63853600	63854000	MergedBins_1217	137	*	10.2355	8.17284	-0.324679	0.18396	0.201308
10	63856000	63856600	MergedBins_1218	487	*	14.5159	29.0524	1.00102	8.65834e-09	1.68032e-08
10	63858200	63858400	MergedBins_1219	134	*	6.51353	7.99387	0.295455	0.321671	0.344297
10	63862800	63863600	MergedBins_1220	817	*	30.1483	48.7388	0.692991	2.12143e-08	3.98024e-08
10	63863800	63864200	MergedBins_1221	207	*	6.14133	12.3487	1.00774	0.000193347	0.000259952
10	63864400	63865200	MergedBins_1222	677	*	8.37454	40.387	2.26981	1.97947e-29	2.19983e-28
10	63865800	63866000	MergedBins_1223	177	*	2.04711	10.5591	2.36682	6.36771e-09	1.24736e-08
10	63866200	63867200	MergedBins_1224	790	*	8.56064	47.1281	2.4608	1.65033e-36	2.48452e-35
10	63867400	63867800	MergedBins_1225	495	*	4.09422	29.5296	2.8505	4.30157e-26	3.93909e-25
10	63869600	63870000	MergedBins_1226	212	*	5.02472	12.647	1.33168	4.14547e-06	6.32349e-06
10	63872000	63872400	MergedBins_1227	232	*	7.44403	13.8401	0.894702	0.000306181	0.000405619
10	63875000	63875200	MergedBins_1228	130	*	10.6077	7.75525	-0.451873	0.0581656	0.0662111
10	63875600	63876400	MergedBins_1229	407	*	38.3368	24.2799	-0.658966	9.22572e-08	1.64458e-07
10	63877600	63878600	MergedBins_1230	884	*	19.9128	52.7357	1.40508	6.28428e-23	4.59558e-22
10	63879000	63879800	MergedBins_1231	609	*	10.7938	36.3304	1.75097	9.70567e-21	6.0814e-20
10	63880600	63881600	MergedBins_1232	565	*	5.58303	33.7055	2.59387	1.22721e-27	1.22949e-26
10	63881800	63882200	MergedBins_1233	247	*	12.0966	14.735	0.284649	0.176494	0.193494
10	63883200	63884400	MergedBins_1234	1964	*	35.9175	117.164	1.70577	9.98342e-62	3.18426e-60
10	63885000	63885600	MergedBins_1235	1472	*	18.2379	87.8133	2.2675	3.81249e-62	1.22641e-60
10	63886800	63889400	MergedBins_1236	3857	*	26.0541	230.092	3.14263	7.94418e-206	1.18023e-203
10	63890000	63891200	MergedBins_1237	1225	*	7.25793	73.0783	3.33181	7.30871e-69	2.71456e-67
10	63891600	63893000	MergedBins_1238	855	*	6.69963	51.0057	2.9285	7.88096e-45	1.54218e-43
10	63893800	63894200	MergedBins_1239	364	*	13.3993	21.7147	0.696519	0.000196286	0.000263715
10	63895600	63896000	MergedBins_1240	224	*	52.4804	13.3629	-1.97355	8.03464e-61	2.47867e-59
10	63898600	63899200	MergedBins_1241	300	*	1.67491	17.8967	3.41754	3.56044e-18	1.80192e-17
10	63902000	63903200	MergedBins_1242	849	*	34.8009	50.6478	0.541375	3.54301e-06	5.43904e-06
10	63904200	63904400	MergedBins_1243	173	*	5.58303	10.3204	0.886387	0.00211317	0.00264257
10	63906200	63907000	MergedBins_1244	383	*	33.6843	22.8482	-0.559996	1.85726e-05	2.69057e-05
10	63907400	63907800	MergedBins_1245	236	*	29.0317	14.0788	-1.04411	1.16947e-12	3.36848e-12
10	63925400	63926000	MergedBins_1246	323	*	36.848	19.2688	-0.935317	3.91867e-13	1.19229e-12
10	63931200	63931400	MergedBins_1247	128	*	4.65252	7.63594	0.714793	0.0281749	0.0327085
10	63932000	63932400	MergedBins_1248	295	*	9.86334	17.5985	0.8353	0.000107591	0.000147268
10	63934000	63934400	MergedBins_1249	230	*	3.53592	13.7208	1.95621	1.43192e-09	2.9644e-09
10	63935000	63936200	MergedBins_1250	1387	*	20.0989	82.7426	2.04151	3.72036e-53	9.27298e-52
10	63939400	63939600	MergedBins_1251	137	*	6.14133	8.17284	0.412287	0.164738	0.18108
10	63941800	63943200	MergedBins_1252	934	*	21.9599	55.7185	1.34328	7.38975e-23	5.38655e-22
10	63943600	63944000	MergedBins_1253	160	*	3.34982	9.54492	1.51065	1.5634e-05	2.27949e-05
10	63945200	63945600	MergedBins_1254	245	*	4.46642	14.6157	1.71032	6.55707e-09	1.28223e-08
10	63946200	63946400	MergedBins_1255	119	*	5.76913	7.09904	0.299271	0.349608	0.37282
10	63947200	63947800	MergedBins_1256	324	*	3.53592	19.3285	2.45057	9.7467e-16	3.90803e-15
10	63948000	63948400	MergedBins_1257	194	*	6.51353	11.5732	0.829279	0.0019601	0.00245551
10	63950600	63952600	MergedBins_1258	1892	*	59.7384	112.869	0.917916	1.07793e-26	1.02708e-25
10	63952800	63953200	MergedBins_1259	150	*	4.28032	8.94837	1.06391	0.00103934	0.00132631
10	63953400	63953800	MergedBins_1260	221	*	2.04711	13.1839	2.68712	6.75299e-12	1.79449e-11
10	63955200	63955600	MergedBins_1261	232	*	25.3097	13.8401	-0.870833	1.98053e-08	3.72268e-08
10	63956400	63956800	MergedBins_1262	285	*	2.97761	17.0019	2.51347	2.85725e-14	9.85979e-14
10	63957800	63959000	MergedBins_1263	783	*	24.5653	46.7105	0.927124	4.85617e-12	1.3055e-11
10	63959200	63959600	MergedBins_1264	199	*	5.39692	11.8715	1.13729	6.54331e-05	9.09746e-05
10	63962800	63963600	MergedBins_1265	591	*	21.5877	35.2566	0.707682	1.33064e-06	2.12057e-06
10	63964000	63964400	MergedBins_1266	239	*	4.46642	14.2577	1.67455	1.52945e-08	2.90431e-08
10	63965400	63965800	MergedBins_1267	321	*	5.39692	19.1495	1.8271	4.69804e-12	1.26389e-11
10	63966600	63966800	MergedBins_1268	129	*	3.72202	7.69559	1.04795	0.00275372	0.00341936
10	63968600	63968800	MergedBins_1269	140	*	3.16371	8.35181	1.40047	0.000124737	0.000170241
10	63971000	63972000	MergedBins_1270	872	*	9.49114	52.0198	2.45441	4.66624e-40	7.79386e-39
10	63972400	63972600	MergedBins_1271	124	*	3.16371	7.39732	1.22538	0.00101779	0.00129955
10	63979600	63980000	MergedBins_1272	258	*	5.21082	15.3912	1.56252	1.6587e-08	3.14234e-08
10	63982400	63982800	MergedBins_1273	120	*	1.11661	7.15869	2.68058	5.5945e-07	9.24042e-07
10	63984400	63984600	MergedBins_1274	121	*	3.53592	7.21835	1.02958	0.00430133	0.00527894
10	63997600	63998000	MergedBins_1275	210	*	18.424	12.5277	-0.556462	0.00182623	0.00229315
10	63999800	64000800	MergedBins_1276	1532	*	12.841	91.3926	2.83133	3.00855e-77	1.30152e-75
10	64001200	64002800	MergedBins_1277	1071	*	12.2827	63.8913	2.379	1.36807e-47	2.99939e-46
10	64003200	64003600	MergedBins_1278	204	*	10.9799	12.1698	0.148431	0.53236	0.556253
10	64005000	64005400	MergedBins_1279	176	*	5.76913	10.4994	0.863884	0.00237129	0.00295619
10	64020000	64020400	MergedBins_1280	186	*	8.93284	11.096	0.312845	0.205571	0.224261
10	64020600	64021000	MergedBins_1281	167	*	4.28032	9.96251	1.21879	0.000129308	0.000176267
10	64022200	64022400	MergedBins_1282	123	*	13.2132	7.33766	-0.848583	8.86142e-05	0.000121973
10	64024000	64024200	MergedBins_1283	121	*	3.16371	7.21835	1.19005	0.00149067	0.00188016
10	64025400	64025800	MergedBins_1284	170	*	5.58303	10.1415	0.861149	0.00291358	0.00360952
10	64026200	64026400	MergedBins_1285	154	*	2.04711	9.18699	2.166	2.1654e-07	3.72707e-07
10	64027800	64028000	MergedBins_1286	138	*	6.14133	8.2325	0.422779	0.153136	0.168755
10	64031000	64032000	MergedBins_1287	467	*	23.2626	27.8592	0.260144	0.0809694	0.0912128
10	64032400	64032800	MergedBins_1288	214	*	12.0966	12.7663	0.0777483	0.755991	0.774231
10	64039000	64040600	MergedBins_1289	1666	*	16.1908	99.3865	2.61788	4.16745e-79	1.85987e-77
10	64041400	64041600	MergedBins_1290	120	*	1.48881	7.15869	2.26554	3.26773e-06	5.02875e-06
10	64061000	64061200	MergedBins_1291	119	*	11.9105	7.09904	-0.746533	0.0010041	0.00128279
10	64062000	64062400	MergedBins_1292	167	*	20.8433	9.96251	-1.065	9.80052e-10	2.06066e-09
10	64065000	64065400	MergedBins_1293	354	*	5.76913	21.1181	1.87206	1.77371e-13	5.60664e-13
10	64069400	64069800	MergedBins_1294	218	*	31.8232	13.005	-1.29102	2.33471e-19	1.30955e-18
10	64071600	64072000	MergedBins_1295	232	*	4.65252	13.8401	1.57277	8.02804e-08	1.44063e-07
10	64075000	64075400	MergedBins_1296	203	*	42.431	12.1101	-1.8089	2.37058e-43	4.42417e-42
10	64084400	64084800	MergedBins_1297	184	*	9.86334	10.9767	0.154291	0.541465	0.565036
10	64089000	64089400	MergedBins_1298	304	*	9.49114	18.1354	0.934151	1.76781e-05	2.56428e-05
10	64091800	64092200	MergedBins_1299	111	*	1.11661	6.62179	2.5681	2.32909e-06	3.63723e-06
10	64092600	64094200	MergedBins_1300	1561	*	12.0966	93.1227	2.94454	7.60004e-81	3.56067e-79
10	64094600	64095000	MergedBins_1301	226	*	4.65252	13.4822	1.53497	1.82989e-07	3.17231e-07
10	64102200	64103000	MergedBins_1302	1409	*	19.7267	84.055	2.09118	3.02494e-55	7.96144e-54
10	64103200	64103400	MergedBins_1303	121	*	0.372202	7.21835	4.27751	1.83682e-12	5.15523e-12
10	64116200	64116600	MergedBins_1304	377	*	6.51353	22.4902	1.78779	1.23555e-13	3.98019e-13
10	64118400	64119600	MergedBins_1305	1383	*	12.4688	82.5039	2.72615	5.29126e-68	1.92102e-66
10	64119800	64120200	MergedBins_1306	374	*	4.83862	22.3113	2.2051	1.82326e-16	7.89055e-16
10	64120800	64121000	MergedBins_1307	124	*	0.558303	7.39732	3.72788	1.0458e-11	2.70641e-11
10	64121400	64121800	MergedBins_1308	228	*	0.930504	13.6015	3.86961	2.12719e-21	1.40047e-20
10	64125000	64125600	MergedBins_1309	687	*	11.5383	40.9835	1.82862	2.73541e-24	2.19357e-23
10	64125800	64126000	MergedBins_1310	121	*	0.744403	7.21835	3.27751	1.71195e-10	3.87911e-10
10	64133000	64133400	MergedBins_1311	348	*	9.86334	20.7602	1.07367	3.28498e-07	5.56e-07
10	64133800	64134600	MergedBins_1312	601	*	15.2603	35.8531	1.23232	1.0549e-13	3.42721e-13
10	64136200	64136600	MergedBins_1313	199	*	1.48881	11.8715	2.99527	1.30637e-11	3.34162e-11
10	64137600	64138000	MergedBins_1314	308	*	3.16371	18.374	2.53797	1.97625e-15	7.72104e-15
10	64139400	64140000	MergedBins_1315	761	*	8.56064	45.398	2.40684	1.37624e-34	1.92794e-33
10	64141000	64141400	MergedBins_1316	226	*	5.39692	13.4822	1.32085	2.21944e-06	3.46799e-06
10	64153600	64154800	MergedBins_1317	802	*	3.72202	47.8439	3.68418	4.67969e-48	1.03808e-46
10	64155200	64155400	MergedBins_1318	135	*	4.46642	8.05353	0.850502	0.00912299	0.010935
10	64157600	64157800	MergedBins_1319	164	*	0.744403	9.78355	3.7162	3.18274e-15	1.21942e-14
10	64158000	64159000	MergedBins_1320	534	*	5.95523	31.8562	2.41935	8.35004e-25	6.9889e-24
10	64160400	64160800	MergedBins_1321	260	*	3.72202	15.5105	2.05909	3.67715e-11	8.95379e-11
10	64164000	64164200	MergedBins_1322	22	*	0.372202	1.31243	1.81808	0.0924338	0.103477
10	64168000	64168800	MergedBins_1323	714	*	9.49114	42.5942	2.166	1.08161e-29	1.22124e-28
10	64170800	64171200	MergedBins_1324	328	*	2.60541	19.5671	2.90885	5.53639e-18	2.73813e-17
10	64172000	64173000	MergedBins_1325	490	*	6.14133	29.2313	2.25089	1.55052e-21	1.03043e-20
10	64173800	64174400	MergedBins_1326	316	*	0.930504	18.8512	4.3405	2.77872e-31	3.39185e-30
10	64177200	64177800	MergedBins_1327	413	*	3.72202	24.6378	2.72672	2.45527e-21	1.60524e-20
10	64187200	64187400	MergedBins_1328	141	*	0.744403	8.41146	3.4982	9.33589e-13	2.71539e-12
10	64195400	64195600	MergedBins_1329	176	*	7.81624	10.4994	0.425763	0.0998145	0.11153
10	64211000	64211400	MergedBins_1330	246	*	1.48881	14.6753	3.30116	7.28366e-15	2.68494e-14
10	64279600	64280000	MergedBins_1331	193	*	0.930504	11.5136	3.62918	2.34114e-17	1.09912e-16
10	64287400	64287800	MergedBins_1332	277	*	4.83862	16.5246	1.77195	2.88943e-10	6.39447e-10
10	64290800	64291200	MergedBins_1333	78	*	11.5383	4.65315	-1.31014	5.82523e-08	1.05591e-07
10	64295200	64295600	MergedBins_1334	243	*	8.18844	14.4964	0.82403	0.000530222	0.000690831
10	64305200	64305400	MergedBins_1335	152	*	2.41931	9.06768	1.90614	1.42561e-06	2.26426e-06
10	64321200	64321400	MergedBins_1336	120	*	6.88573	7.15869	0.0560864	0.909491	0.921571
10	64341800	64342200	MergedBins_1337	249	*	4.65252	14.8543	1.67479	7.52236e-09	1.46667e-08
10	64342600	64342800	MergedBins_1338	127	*	0.930504	7.57628	3.02541	2.90811e-10	6.42573e-10
10	64343000	64343200	MergedBins_1339	151	*	0.930504	9.00802	3.27513	7.3362e-13	2.1588e-12
10	64344200	64344800	MergedBins_1340	376	*	2.04711	22.4306	3.45381	1.447e-22	1.038e-21
10	64376400	64376600	MergedBins_1341	10	*	0.186101	0.596558	1.68058	0.47944	0.503193
10	64379800	64380000	MergedBins_1342	130	*	0.558303	7.75525	3.79605	1.73187e-12	4.89231e-12
10	64390400	64390600	MergedBins_1343	124	*	1.30271	7.39732	2.50549	7.35197e-07	1.19958e-06
10	64428000	64428600	MergedBins_1344	322	*	2.60541	19.2092	2.88221	1.4232e-17	6.80342e-17
10	64429000	64429400	MergedBins_1345	238	*	1.48881	14.1981	3.25347	2.6135e-14	9.05462e-14
10	64430800	64431000	MergedBins_1346	132	*	0.372202	7.87456	4.40304	1.29996e-13	4.16631e-13
10	64503400	64503800	MergedBins_1347	271	*	1.67491	16.1667	3.27087	3.64483e-16	1.52252e-15
10	64509800	64510000	MergedBins_1348	129	*	0.930504	7.69559	3.04795	1.19391e-10	2.75112e-10
10	64546400	64546800	MergedBins_1349	223	*	0.372202	13.3032	5.15955	2.50229e-24	2.01809e-23
10	64617800	64618200	MergedBins_1350	69	*	0.744403	4.11625	2.46717	3.07851e-05	4.37337e-05
10	64657000	64657200	MergedBins_1351	16	*	0.186101	0.954492	2.35865	0.0912397	0.102252
10	64678400	64679000	MergedBins_1352	344	*	2.23321	20.5216	3.19995	6.39375e-20	3.75218e-19
10	64680000	64680200	MergedBins_1353	127	*	1.86101	7.57628	2.02541	5.77138e-06	8.6951e-06
10	64683800	64684200	MergedBins_1354	203	*	1.11661	12.1101	3.43902	9.57568e-13	2.77941e-12
10	64701400	64701600	MergedBins_1355	143	*	1.67491	8.53078	2.3486	2.18261e-07	3.75496e-07
10	64730800	64731000	MergedBins_1356	103	*	0.744403	6.14454	3.04515	1.18582e-08	2.27318e-08
10	64732200	64732400	MergedBins_1357	209	*	0.186101	12.4681	6.06601	6.10767e-24	4.76914e-23
10	64836800	64837000	MergedBins_1358	167	*	0.186101	9.96251	5.74235	3.86769e-19	2.1158e-18
10	64841800	64842200	MergedBins_1359	172	*	0.930504	10.2608	3.46299	4.22519e-15	1.59661e-14
10	64880000	64880400	MergedBins_1360	222	*	4.28032	13.2436	1.6295	8.30782e-08	1.48753e-07
10	64891000	64891200	MergedBins_1361	14	*	0.558303	0.835181	0.581042	0.777502	0.795107
10	64974400	64974800	MergedBins_1362	200	*	0.930504	11.9312	3.68058	4.11873e-18	2.0632e-17
10	65006000	65006600	MergedBins_1363	169	*	3.90812	10.0818	1.36721	3.09726e-05	4.39944e-05
10	65006800	65007800	MergedBins_1364	544	*	9.86334	32.4527	1.71819	2.62025e-18	1.34234e-17
10	65008000	65008400	MergedBins_1365	355	*	4.09422	21.1778	2.37089	1.1285e-16	4.95989e-16
10	65008800	65009000	MergedBins_1366	134	*	3.90812	7.99387	1.03242	0.00251969	0.00313773
10	65009400	65009800	MergedBins_1367	159	*	2.23321	9.48527	2.08657	2.28896e-07	3.93134e-07
10	67038800	67039000	MergedBins_1368	119	*	1.30271	7.09904	2.44611	1.61119e-06	2.54575e-06
10	67106800	67107000	MergedBins_1369	124	*	0.930504	7.39732	2.99092	4.19112e-10	9.11614e-10
10	67170600	67171000	MergedBins_1370	226	*	2.04711	13.4822	2.7194	3.08281e-12	8.43218e-12
10	67200800	67201000	MergedBins_1371	156	*	4.65252	9.3063	1.0002	0.00139205	0.00175852
10	67236400	67236600	MergedBins_1372	154	*	3.72202	9.18699	1.30351	0.000121242	0.000165572
10	68094800	68095000	MergedBins_1373	140	*	3.90812	8.35181	1.09561	0.00122984	0.00155971
10	68172600	68173000	MergedBins_1374	77	*	0.558303	4.59349	3.04047	1.25139e-06	1.99907e-06
10	68233000	68233400	MergedBins_1375	222	*	2.60541	13.2436	2.34571	8.23099e-11	1.92454e-10
10	68235400	68235800	MergedBins_1376	155	*	8.74674	9.24664	0.0801847	0.801221	0.81803
10	68246600	68246800	MergedBins_1377	63	*	0.372202	3.75831	3.33593	6.92024e-06	1.03684e-05
10	68254800	68255200	MergedBins_1378	242	*	0.930504	14.4367	3.95558	6.13789e-23	4.49727e-22
10	69237000	69237400	MergedBins_1379	270	*	2.97761	16.1071	2.43546	2.89238e-13	8.95225e-13
10	69239200	69239600	MergedBins_1380	204	*	1.86101	12.1698	2.70915	3.88595e-11	9.4317e-11
10	69539800	69540000	MergedBins_1381	13	*	0.186101	0.775525	2.05909	0.211212	0.230081
10	69555400	69556000	MergedBins_1382	337	*	45.2225	20.104	-1.16956	6.82486e-23	4.98444e-22
10	69559800	69560000	MergedBins_1383	120	*	0.930504	7.15869	2.94361	1.55395e-09	3.19186e-09
10	69597800	69598400	MergedBins_1384	402	*	3.90812	23.9816	2.61738	3.37231e-20	2.01998e-19
10	69609200	69609800	MergedBins_1385	272	*	1.11661	16.2264	3.86115	1.453e-17	6.94086e-17
10	69621800	69622000	MergedBins_1386	169	*	0.930504	10.0818	3.4376	6.33051e-15	2.35357e-14
10	69627600	69627800	MergedBins_1387	167	*	2.79151	9.96251	1.83546	7.1086e-07	1.16256e-06
10	69641800	69642200	MergedBins_1388	217	*	5.58303	12.9453	1.21331	1.2325e-05	1.81224e-05
10	69647000	69647800	MergedBins_1389	507	*	23.8209	30.2455	0.344491	0.0176238	0.0207583
10	69648000	69648400	MergedBins_1390	280	*	10.9799	16.7036	0.605289	0.00388889	0.00478421
10	69649000	69649200	MergedBins_1391	136	*	7.25793	8.11319	0.16071	0.599284	0.622208
10	69651400	69652000	MergedBins_1392	360	*	39.4534	21.4761	-0.877418	1.3883e-12	3.9594e-12
10	69657400	69657800	MergedBins_1393	358	*	9.86334	21.3568	1.11454	1.02018e-07	1.8083e-07
10	69667400	69667600	MergedBins_1394	125	*	2.23321	7.45697	1.73947	3.53331e-05	5.00058e-05
10	69669200	69670000	MergedBins_1395	565	*	3.90812	33.7055	3.10844	2.7585e-31	3.37081e-30
10	69670600	69671000	MergedBins_1396	238	*	2.04711	14.1981	2.79404	4.67799e-13	1.40926e-12
10	69671400	69672000	MergedBins_1397	403	*	2.60541	24.0413	3.20593	3.93673e-23	2.93591e-22
10	69672400	69672800	MergedBins_1398	264	*	7.07183	15.7491	1.15512	2.98492e-06	4.61428e-06
10	69673200	69673400	MergedBins_1399	188	*	3.34982	11.2153	1.74331	3.05833e-07	5.19429e-07
10	69682200	69682600	MergedBins_1400	230	*	5.58303	13.7208	1.29725	2.38722e-06	3.72655e-06
10	69683600	69684200	MergedBins_1401	263	*	1.67491	15.6895	3.22764	1.30464e-15	5.18502e-15
10	69688000	69688200	MergedBins_1402	132	*	8.37454	7.87456	-0.0888098	0.787922	0.805325
10	69691200	69691600	MergedBins_1403	303	*	2.04711	18.0757	3.14239	1.60873e-17	7.64807e-17
10	69697200	69697400	MergedBins_1404	137	*	6.14133	8.17284	0.412287	0.164738	0.18108
10	69700800	69701200	MergedBins_1405	90	*	5.02472	5.36902	0.0956147	0.845959	0.860438
10	69711400	69711800	MergedBins_1406	196	*	5.02472	11.6925	1.21847	3.18768e-05	4.52616e-05
10	69722600	69723000	MergedBins_1407	207	*	1.67491	12.3487	2.88221	9.52885e-12	2.48362e-11
10	69725000	69725400	MergedBins_1408	259	*	1.30271	15.4508	3.5681	3.30768e-16	1.38991e-15
10	69746000	69746200	MergedBins_1409	138	*	1.86101	8.2325	2.14525	1.08938e-06	1.74993e-06
10	69798800	69799000	MergedBins_1410	161	*	2.60541	9.60458	1.88221	8.08569e-07	1.31474e-06
10	69909600	69910000	MergedBins_1411	151	*	37.2202	9.00802	-2.0468	6.01029e-46	1.2429e-44
10	69911400	69911600	MergedBins_1412	122	*	1.67491	7.278	2.11946	5.51287e-06	8.3183e-06
10	70115200	70115400	MergedBins_1413	140	*	1.67491	8.35181	2.31801	3.47197e-07	5.85373e-07
10	70174200	70174400	MergedBins_1414	129	*	2.60541	7.69559	1.56252	8.06914e-05	0.000111461
10	71023000	71023200	MergedBins_1415	204	*	1.30271	12.1698	3.22372	2.21941e-12	6.18751e-12
10	71055800	71056000	MergedBins_1416	31	*	0.186101	1.84933	3.31285	0.00297515	0.00368217
10	71115800	71116000	MergedBins_1417	165	*	3.90812	9.8432	1.33265	5.23908e-05	7.33381e-05
10	71134800	71135200	MergedBins_1418	141	*	4.83862	8.41146	0.797761	0.0112861	0.0134606
10	72297200	72297400	MergedBins_1419	278	*	167.491	16.5843	-3.33619	0	0
10	75287600	75287800	MergedBins_1420	159	*	0.372202	9.48527	4.67153	8.8336e-17	3.92215e-16
10	75296600	75296800	MergedBins_1421	32	*	0.558303	1.90898	1.77369	0.0291727	0.033832
10	76595800	76596400	MergedBins_1422	497	*	24.007	29.6489	0.304524	0.0363008	0.0418537
10	76599200	76599600	MergedBins_1423	246	*	3.16371	14.6753	2.2137	2.64683e-11	6.54806e-11
10	76709000	76709400	MergedBins_1424	220	*	6.14133	13.1243	1.09561	4.25339e-05	5.98666e-05
10	78315600	78315800	MergedBins_1425	30	*	2.41931	1.78967	-0.4349	0.463287	0.487146
10	79077800	79079000	MergedBins_1426	643	*	5.39692	38.3587	2.82934	2.69315e-33	3.60288e-32
10	79080000	79080400	MergedBins_1427	216	*	4.09422	12.8856	1.65411	9.66795e-08	1.71874e-07
10	79710800	79711000	MergedBins_1428	165	*	44.6642	9.8432	-2.18192	3.4726e-60	1.05118e-58
10	79711200	79711800	MergedBins_1429	241	*	76.8596	14.377	-2.41846	1.70642e-118	1.2931e-116
10	80227200	80227600	MergedBins_1430	253	*	2.04711	15.0929	2.88221	4.40281e-14	1.49465e-13
10	80279600	80280000	MergedBins_1431	195	*	1.86101	11.6329	2.64405	1.5953e-10	3.64111e-10
10	80280400	80280800	MergedBins_1432	225	*	7.81624	13.4225	0.780113	0.00144791	0.00182786
10	80761200	80761600	MergedBins_1433	303	*	7.81624	18.0757	1.20951	2.2252e-07	3.82649e-07
10	80779000	80779400	MergedBins_1434	228	*	0.930504	13.6015	3.86961	2.12719e-21	1.40047e-20
10	80779800	80780200	MergedBins_1435	185	*	4.28032	11.0363	1.36647	1.27102e-05	1.86521e-05
10	81206600	81206800	MergedBins_1436	119	*	9.86334	7.09904	-0.474454	0.0559394	0.0637734
10	81532800	81533400	MergedBins_1437	9	*	0.372202	0.536902	0.528574	1	1
10	83368200	83368400	MergedBins_1438	135	*	1.86101	8.05353	2.11354	1.71945e-06	2.71263e-06
10	83631400	83631600	MergedBins_1439	133	*	2.23321	7.93422	1.82897	1.10018e-05	1.62275e-05
10	83632400	83632600	MergedBins_1440	162	*	0.372202	9.66424	4.6985	3.48387e-17	1.60622e-16
10	83632800	83633200	MergedBins_1441	198	*	1.86101	11.8118	2.66608	9.96694e-11	2.3213e-10
10	84398600	84398800	MergedBins_1442	159	*	6.51353	9.48527	0.542249	0.0522332	0.0597049
10	85013000	85013400	MergedBins_1443	164	*	2.97761	9.78355	1.7162	2.27196e-06	3.54858e-06
10	86038000	86038200	MergedBins_1444	166	*	0.186101	9.90286	5.73369	6.16472e-19	3.32089e-18
10	86304200	86304400	MergedBins_1445	135	*	2.41931	8.05353	1.73503	1.71112e-05	2.48364e-05
10	86304800	86305200	MergedBins_1446	365	*	2.04711	21.7744	3.41097	8.36072e-22	5.64936e-21
10	86323800	86324200	MergedBins_1447	210	*	3.34982	12.5277	1.90297	1.25957e-08	2.40843e-08
10	86345800	86346200	MergedBins_1448	321	*	17.1213	19.1495	0.161517	0.373562	0.39709
10	86347200	86347600	MergedBins_1449	329	*	17.8657	19.6267	0.13563	0.450742	0.474618
10	86347800	86348200	MergedBins_1450	202	*	3.90812	12.0505	1.62454	3.45498e-07	5.83111e-07
10	86349000	86349400	MergedBins_1451	197	*	15.2603	11.7522	-0.376851	0.0544213	0.0621243
10	86782600	86783000	MergedBins_1452	190	*	7.81624	11.3346	0.536187	0.0343681	0.0396698
10	88110200	88110400	MergedBins_1453	7	*	0.558303	0.41759	-0.418958	0.713284	0.733487
10	88130200	88130400	MergedBins_1454	136	*	2.23321	8.11319	1.86115	7.0784e-06	1.05942e-05
10	88381400	88381600	MergedBins_1455	12	*	0.372202	0.715869	0.943612	0.540031	0.563591
10	88394400	88394800	MergedBins_1456	160	*	2.04711	9.54492	2.22115	8.67189e-08	1.54952e-07
10	89437800	89438000	MergedBins_1457	121	*	0.372202	7.21835	4.27751	1.83682e-12	5.15523e-12
10	89752400	89752800	MergedBins_1458	75	*	7.07183	4.47418	-0.66046	0.027139	0.0315421
10	89798400	89798800	MergedBins_1459	158	*	1.86101	9.42561	2.3405	5.06415e-08	9.2091e-08
10	91153800	91155000	MergedBins_1460	829	*	22.5182	49.4546	1.13501	1.49874e-16	6.53621e-16
10	91155200	91155800	MergedBins_1461	382	*	11.3522	22.7885	1.00534	3.36967e-07	5.69565e-07
10	91157000	91157200	MergedBins_1462	140	*	0.558303	8.35181	3.90297	1.23002e-13	3.96483e-13
10	93181200	93181400	MergedBins_1463	147	*	2.60541	8.7694	1.75097	6.22468e-06	9.34986e-06
10	93188600	93189000	MergedBins_1464	220	*	1.86101	13.1243	2.81808	3.13156e-12	8.55929e-12
10	93234000	93234600	MergedBins_1465	408	*	5.21082	24.3396	2.22372	5.686e-18	2.80843e-17
10	93476400	93476600	MergedBins_1466	129	*	10.6077	7.69559	-0.463014	0.0522525	0.0597209
10	93697400	93697800	MergedBins_1467	247	*	5.21082	14.735	1.49966	7.42791e-08	1.33549e-07
10	93714000	93714200	MergedBins_1468	128	*	0.558303	7.63594	3.77369	2.72001e-12	7.51078e-12
10	93735200	93735400	MergedBins_1469	138	*	0.930504	8.2325	3.14525	1.42426e-11	3.62599e-11
10	93736400	93736600	MergedBins_1470	146	*	0.372202	8.70974	4.54847	2.10667e-15	8.19938e-15
10	93986600	93986800	MergedBins_1471	124	*	0.372202	7.39732	4.31285	7.44847e-13	2.18411e-12
10	94003200	94003400	MergedBins_1472	150	*	1.11661	8.94837	3.00251	4.69202e-09	9.26505e-09
10	95288400	95288600	MergedBins_1473	123	*	4.28032	7.33766	0.777602	0.0211719	0.0247977
10	95408400	95408800	MergedBins_1474	261	*	2.79151	15.5702	2.47966	4.83118e-13	1.44692e-12
10	95518600	95519000	MergedBins_1475	54	*	0.744403	3.22141	2.11354	0.00105699	0.00134838
10	96077600	96078000	MergedBins_1476	414	*	1019.09	24.6975	-5.36677	0	0
10	98974800	98975200	MergedBins_1477	169	*	1.11661	10.0818	3.17457	2.24163e-10	5.02503e-10
10	98975800	98976200	MergedBins_1478	225	*	0.558303	13.4225	4.58747	3.37474e-23	2.53016e-22
10	98976400	98977200	MergedBins_1479	568	*	6.14133	33.8845	2.464	1.09859e-26	1.04589e-25
10	98992800	98993200	MergedBins_1480	556	*	0.744403	33.1686	5.47759	1.45494e-60	4.47623e-59
10	99018600	99019000	MergedBins_1481	81	*	3.16371	4.83212	0.611036	0.138417	0.153237
10	99022800	99023000	MergedBins_1482	81	*	5.76913	4.83212	-0.255697	0.465326	0.489244
10	100023000	100023200	MergedBins_1483	121	*	2.79151	7.21835	1.37062	0.000460616	0.000602295
10	108163200	108163600	MergedBins_1484	189	*	7.25793	11.2749	0.635489	0.0143801	0.0170374
10	108166400	108167000	MergedBins_1485	298	*	3.90812	17.7774	2.1855	2.78068e-13	8.61364e-13
10	108167200	108167400	MergedBins_1486	129	*	2.60541	7.69559	1.56252	8.06914e-05	0.000111461
10	108173600	108174000	MergedBins_1487	153	*	1.86101	9.12733	2.29411	1.09473e-07	1.93588e-07
10	108207600	108207800	MergedBins_1488	138	*	1.67491	8.2325	2.29725	4.729e-07	7.86727e-07
10	108254400	108254600	MergedBins_1489	141	*	0.930504	8.41146	3.17627	9.91621e-12	2.57507e-11
10	108346000	108346200	MergedBins_1490	125	*	0.744403	7.45697	3.32443	7.65853e-11	1.79739e-10
10	109999200	109999600	MergedBins_1491	42	*	0.372202	2.50554	2.75097	0.0011535	0.00146701
10	110184800	110185200	MergedBins_1492	68	*	3.16371	4.05659	0.358649	0.427981	0.451747
10	110420800	110421000	MergedBins_1493	14	*	0.372202	0.835181	1.166	0.386783	0.410487
10	111167400	111167800	MergedBins_1494	215	*	17.8657	12.826	-0.478121	0.00814262	0.00979839
10	111172000	111173200	MergedBins_1495	658	*	9.49114	39.2535	2.04817	4.34714e-26	3.9776e-25
10	111178200	111178400	MergedBins_1496	140	*	2.60541	8.35181	1.68058	1.70186e-05	2.47147e-05
10	111191600	111191800	MergedBins_1497	140	*	0.558303	8.35181	3.90297	1.23002e-13	3.96483e-13
10	111216200	111216600	MergedBins_1498	271	*	13.9576	16.1667	0.211979	0.287113	0.308889
10	111220600	111221400	MergedBins_1499	363	*	2.79151	21.655	2.95558	5.78165e-20	3.41069e-19
10	111228200	111229000	MergedBins_1500	543	*	4.46642	32.3931	2.8585	1.53432e-28	1.6221e-27
10	111229200	111229600	MergedBins_1501	298	*	0.744403	17.7774	4.57782	2.23298e-30	2.61542e-29
10	111230400	111230800	MergedBins_1502	270	*	1.86101	16.1071	3.11354	1.14312e-15	4.55113e-15
10	111232200	111232400	MergedBins_1503	120	*	2.23321	7.15869	1.68058	7.27034e-05	0.000100723
10	111233600	111234000	MergedBins_1504	271	*	3.72202	16.1667	2.11887	7.1129e-12	1.8782e-11
10	111237200	111237600	MergedBins_1505	245	*	10.7938	14.6157	0.437306	0.0437186	0.0501908
10	111239400	111240400	MergedBins_1506	727	*	8.00234	43.3697	2.4382	1.83375e-33	2.46193e-32
10	111240800	111241400	MergedBins_1507	544	*	0.930504	32.4527	5.12418	1.005e-57	2.82275e-56
10	111241600	111242000	MergedBins_1508	227	*	4.46642	13.5419	1.60024	8.18244e-08	1.46694e-07
10	111251000	111251200	MergedBins_1509	133	*	6.14133	7.93422	0.369537	0.218632	0.237935
10	111253400	111253800	MergedBins_1510	239	*	7.25793	14.2577	0.974114	9.06001e-05	0.00012463
10	111254400	111254800	MergedBins_1511	200	*	0.744403	11.9312	4.00251	2.91558e-19	1.61293e-18
10	111483000	111483400	MergedBins_1512	177	*	2.60541	10.5591	2.0189	7.54779e-08	1.35596e-07
10	111484200	111484400	MergedBins_1513	125	*	2.79151	7.45697	1.41754	0.000268773	0.000357572
10	115378600	115378800	MergedBins_1514	29	*	2.41931	1.73002	-0.48381	0.406828	0.430788
10	116495400	116497200	MergedBins_1515	1099	*	9.30504	65.5617	2.81677	1.15313e-55	3.07076e-54
10	116497800	116498000	MergedBins_1516	179	*	0.372202	10.6784	4.84246	3.654e-19	2.00863e-18
10	116541400	116541800	MergedBins_1517	303	*	3.16371	18.0757	2.51436	4.28196e-15	1.61752e-14
10	116545200	116545400	MergedBins_1518	123	*	24.7514	7.33766	-1.75412	1.10648e-24	9.17277e-24
10	116554000	116554600	MergedBins_1519	613	*	12.6549	36.569	1.53093	5.03091e-18	2.49359e-17
10	116565000	116565200	MergedBins_1520	137	*	1.30271	8.17284	2.64933	9.48189e-08	1.68678e-07
10	116565800	116566000	MergedBins_1521	137	*	1.30271	8.17284	2.64933	9.48189e-08	1.68678e-07
10	116944800	116945000	MergedBins_1522	154	*	3.90812	9.18699	1.23312	0.000216376	0.000289729
10	117071400	117071800	MergedBins_1523	193	*	2.04711	11.5136	2.49167	5.34296e-10	1.15107e-09
10	117094600	117095000	MergedBins_1524	31	*	3.53592	1.84933	-0.935082	0.0358346	0.0413203
10	117116400	117116600	MergedBins_1525	125	*	0.186101	7.45697	5.32443	3.98646e-14	1.35739e-13
10	117697600	117697800	MergedBins_1526	122	*	1.48881	7.278	2.28939	2.39803e-06	3.74084e-06
10	117833000	117833200	MergedBins_1527	186	*	1.11661	11.096	3.31285	1.4675e-11	3.73104e-11
10	120783000	120783200	MergedBins_1528	141	*	7.44403	8.41146	0.176272	0.55132	0.574735
10	120783400	120783800	MergedBins_1529	210	*	19.9128	12.5277	-0.668572	0.000108318	0.000148245
10	120787000	120787200	MergedBins_1530	121	*	2.79151	7.21835	1.37062	0.000460616	0.000602295
10	120828600	120828800	MergedBins_1531	144	*	4.83862	8.59043	0.828134	0.00825325	0.00992729
10	120837400	120838000	MergedBins_1532	649	*	2.79151	38.7166	3.79383	1.04848e-39	1.72571e-38
10	120840400	120841200	MergedBins_1533	699	*	7.25793	41.6994	2.5224	4.02416e-33	5.30803e-32
10	120845600	120846800	MergedBins_1534	868	*	13.7715	51.7812	1.91075	1.05782e-31	1.31395e-30
10	120848600	120849200	MergedBins_1535	312	*	5.76913	18.6126	1.68986	7.09023e-11	1.67271e-10
10	120852600	120853200	MergedBins_1536	462	*	3.90812	27.561	2.81808	2.9491e-24	2.35823e-23
10	120854400	120854800	MergedBins_1537	196	*	4.83862	11.6925	1.27292	1.80673e-05	2.61939e-05
10	120857200	120857800	MergedBins_1538	312	*	5.58303	18.6126	1.73716	3.50159e-11	8.5355e-11
10	120859200	120859600	MergedBins_1539	218	*	3.53592	13.005	1.87891	8.3202e-09	1.61637e-08
10	120865600	120866200	MergedBins_1540	420	*	33.8704	25.0554	-0.4349	0.000773113	0.000996487
10	120882200	120882400	MergedBins_1541	132	*	0.372202	7.87456	4.40304	1.29996e-13	4.16631e-13
10	120883800	120884200	MergedBins_1542	234	*	0.930504	13.9595	3.90709	5.80181e-22	3.95342e-21
10	120884400	120884600	MergedBins_1543	119	*	0.186101	7.09904	5.25347	2.72172e-13	8.44024e-13
10	120889000	120889400	MergedBins_1544	100	*	4.28032	5.96558	0.478943	0.181219	0.198481
10	120959600	120960000	MergedBins_1545	383	*	2.97761	22.8482	2.93985	6.42376e-21	4.07705e-20
10	121449600	121450000	MergedBins_1546	252	*	4.09422	15.0333	1.8765	5.59108e-10	1.20154e-09
10	121451600	121452000	MergedBins_1547	43	*	0.930504	2.5652	1.46299	0.0271395	0.0315421
10	123054000	123054200	MergedBins_1548	122	*	8.18844	7.278	-0.170045	0.561825	0.585254
10	123143200	123143400	MergedBins_1549	141	*	0.930504	8.41146	3.17627	9.91621e-12	2.57507e-11
10	123155000	123155400	MergedBins_1550	285	*	2.60541	17.0019	2.70611	4.71433e-15	1.77787e-14
10	123156400	123156800	MergedBins_1551	260	*	6.51353	15.5105	1.25173	9.40936e-07	1.5199e-06
10	123165800	123166000	MergedBins_1552	17	*	0.930504	1.01415	0.124184	1	1
10	123166400	123166800	MergedBins_1553	188	*	4.46642	11.2153	1.32828	1.5673e-05	2.28429e-05
10	127425600	127426000	MergedBins_1554	192	*	3.53592	11.4539	1.69568	3.5224e-07	5.93249e-07
10	127455800	127456000	MergedBins_1555	168	*	0.930504	10.0222	3.42904	9.7008e-15	3.54242e-14
10	127697600	127697800	MergedBins_1556	131	*	0.186101	7.81491	5.39207	1.09586e-14	3.96328e-14
10	128036400	128036600	MergedBins_1557	748	*	11.1661	44.6225	1.99865	8.99254e-29	9.62415e-28
10	128039000	128044800	MergedBins_1558	27106	*	363.641	1617.03	2.15276	0	0
10	128045000	128045200	MergedBins_1559	431	*	6.14133	25.7116	2.0658	1.04795e-17	5.06305e-17
10	128046600	128046800	MergedBins_1560	400	*	26.2402	23.8623	-0.137046	0.357494	0.380727
10	128047600	128047800	MergedBins_1561	413	*	27.3568	24.6378	-0.151025	0.297783	0.31982
10	128089000	128089200	MergedBins_1562	461	*	64.577	27.5013	-1.23152	5.64546e-35	8.04835e-34
10	128090000	128090200	MergedBins_1563	604	*	91.5616	36.0321	-1.34546	8.1456e-57	2.22155e-55
10	128361000	128361200	MergedBins_1564	127	*	21.0294	7.57628	-1.47285	3.17559e-16	1.3364e-15
10	128362000	128362400	MergedBins_1565	235	*	43.7337	14.0191	-1.64135	2.2117e-38	3.48775e-37
10	128392400	128392600	MergedBins_1566	122	*	0.558303	7.278	3.70442	1.59121e-11	4.02473e-11
10	128469000	128469200	MergedBins_1567	155	*	50.9916	9.24664	-2.46326	4.30407e-81	2.05052e-79
10	128677600	128678000	MergedBins_1568	176	*	3.53592	10.4994	1.57015	3.33198e-06	5.12623e-06
10	128678200	128678400	MergedBins_1569	194	*	3.90812	11.5732	1.56624	1.0511e-06	1.6906e-06
11	3155800	3156600	MergedBins_1570	553	*	8.93284	32.9896	1.88482	1.9365e-20	1.18125e-19
11	3315200	3315600	MergedBins_1571	172	*	12.4688	10.2608	-0.281175	0.200528	0.218929
11	3525400	3526000	MergedBins_1572	719	*	14.702	42.8925	1.54472	4.10051e-21	2.63962e-20
11	4541400	4541600	MergedBins_1573	145	*	1.67491	8.65009	2.36863	1.60095e-07	2.78569e-07
11	4574800	4575200	MergedBins_1574	210	*	15.2603	12.5277	-0.284657	0.147217	0.162533
11	4577200	4577600	MergedBins_1575	252	*	8.56064	15.0333	0.812367	0.000481211	0.000628497
11	4589400	4589600	MergedBins_1576	135	*	2.23321	8.05353	1.8505	8.20093e-06	1.22192e-05
11	4592200	4592600	MergedBins_1577	205	*	21.7738	12.2294	-0.832235	6.25935e-07	1.02979e-06
11	4836800	4837200	MergedBins_1578	197	*	1.86101	11.7522	2.65877	1.16594e-10	2.696e-10
11	4992800	4993000	MergedBins_1579	128	*	2.23321	7.63594	1.77369	2.285e-05	3.27869e-05
11	5003400	5003600	MergedBins_1580	10	*	0.930504	0.596558	-0.641351	0.379474	0.403146
11	5207000	5207200	MergedBins_1581	131	*	1.11661	7.81491	2.80711	9.73065e-08	1.72804e-07
11	5279600	5279800	MergedBins_1582	137	*	1.67491	8.17284	2.28676	5.51826e-07	9.12516e-07
11	5394000	5394200	MergedBins_1583	44	*	0.186101	2.62485	3.81808	8.2846e-05	0.000114284
11	5433600	5434400	MergedBins_1584	680	*	4.83862	40.5659	3.0676	4.7161e-37	7.18616e-36
11	5751000	5751600	MergedBins_1585	402	*	4.83862	23.9816	2.30926	2.64779e-18	1.35522e-17
11	5789800	5790200	MergedBins_1586	156	*	0.372202	9.3063	4.64405	2.29811e-16	9.82133e-16
11	6300400	6300800	MergedBins_1587	290	*	2.41931	17.3002	2.83812	8.51785e-16	3.43851e-15
11	6315800	6316200	MergedBins_1588	12	*	0.186101	0.715869	1.94361	0.209977	0.228869
11	6320800	6321200	MergedBins_1589	225	*	5.39692	13.4225	1.31445	2.52472e-06	3.93195e-06
11	6322200	6322600	MergedBins_1590	187	*	4.28032	11.1556	1.38198	9.76372e-06	1.44675e-05
11	6323600	6324000	MergedBins_1591	215	*	5.02472	12.826	1.35195	2.80626e-06	4.34703e-06
11	6324200	6324600	MergedBins_1592	244	*	2.60541	14.556	2.48203	2.77545e-12	7.64704e-12
11	6331800	6332000	MergedBins_1593	122	*	1.30271	7.278	2.48203	1.00648e-06	1.62044e-06
11	6392000	6392600	MergedBins_1594	481	*	15.8186	28.6944	0.859151	3.62722e-07	6.10266e-07
11	6393400	6393800	MergedBins_1595	169	*	1.48881	10.0818	2.75953	1.51893e-09	3.13132e-09
11	6419000	6419600	MergedBins_1596	220	*	13.2132	13.1243	-0.00973828	0.984913	0.992029
11	6564800	6565000	MergedBins_1597	141	*	1.67491	8.41146	2.32828	2.97451e-07	5.06107e-07
11	6581400	6581600	MergedBins_1598	3	*	0.186101	0.178967	-0.0563884	1	1
11	9004800	9005000	MergedBins_1599	159	*	1.30271	9.48527	2.86418	2.9033e-09	5.82553e-09
11	11853400	11853800	MergedBins_1600	17	*	3.72202	1.01415	-1.87582	5.50045e-05	7.67873e-05
11	11856600	11857000	MergedBins_1601	205	*	12.841	12.2294	-0.0703952	0.779347	0.79685
11	11858600	11859000	MergedBins_1602	234	*	13.9576	13.9595	0.000195158	0.947916	0.957499
11	11868000	11868200	MergedBins_1603	160	*	0.186101	9.54492	5.68058	4.33668e-18	2.15992e-17
11	11869200	11869800	MergedBins_1604	416	*	8.74674	24.8168	1.5045	2.00805e-12	5.61349e-12
11	11870000	11870400	MergedBins_1605	154	*	1.30271	9.18699	2.81808	6.42308e-09	1.25777e-08
11	11870800	11871200	MergedBins_1606	166	*	11.9105	9.90286	-0.266311	0.238214	0.258573
11	11930400	11931200	MergedBins_1607	537	*	103.472	32.0352	-1.69151	3.77087e-93	2.15035e-91
11	11931600	11932200	MergedBins_1608	311	*	41.5005	18.5529	-1.16148	6.96402e-21	4.4125e-20
11	11933200	11933600	MergedBins_1609	295	*	24.9375	17.5985	-0.502869	0.000944333	0.0012089
11	11944800	11945000	MergedBins_1610	138	*	10.9799	8.2325	-0.415469	0.0759459	0.085699
11	11945400	11945600	MergedBins_1611	152	*	10.0494	9.06768	-0.148311	0.570073	0.593299
11	11949800	11950600	MergedBins_1612	475	*	12.2827	28.3365	1.20604	8.00421e-11	1.87423e-10
11	11956200	11956400	MergedBins_1613	187	*	33.8704	11.1556	-1.60225	6.25733e-29	6.74099e-28
11	11959600	11960200	MergedBins_1614	583	*	80.3956	34.7793	-1.20889	7.64078e-42	1.35908e-40
11	11961000	11961200	MergedBins_1615	132	*	2.79151	7.87456	1.49615	0.000103283	0.000141594
11	11961600	11962000	MergedBins_1616	332	*	14.3298	19.8057	0.466902	0.0119999	0.0142968
11	11962600	11963000	MergedBins_1617	199	*	5.21082	11.8715	1.18792	3.81641e-05	5.3938e-05
11	11963400	11963600	MergedBins_1618	182	*	13.5854	10.8574	-0.323381	0.121544	0.135128
11	11971600	11972400	MergedBins_1619	348	*	2.97761	20.7602	2.80159	1.5652e-18	8.197e-18
11	11972600	11974000	MergedBins_1620	1397	*	13.5854	83.3391	2.61694	1.40553e-66	4.85316e-65
11	11976400	11976600	MergedBins_1621	140	*	3.53592	8.35181	1.24	0.000412001	0.000540919
11	11978600	11979000	MergedBins_1622	188	*	0.930504	11.2153	3.59131	5.30391e-17	2.40798e-16
11	11981200	11981800	MergedBins_1623	292	*	1.30271	17.4195	3.74112	1.65638e-18	8.65843e-18
11	11982000	11983400	MergedBins_1624	814	*	6.69963	48.5598	2.85761	4.78459e-42	8.57505e-41
11	11983600	11984200	MergedBins_1625	345	*	7.81624	20.5812	1.39678	1.06645e-09	2.23443e-09
11	11984600	11984800	MergedBins_1626	154	*	7.63013	9.18699	0.267884	0.329759	0.352452
11	11985200	11986000	MergedBins_1627	461	*	30.3344	27.5013	-0.141456	0.303138	0.325324
11	11994200	11994400	MergedBins_1628	138	*	20.6572	8.2325	-1.32724	1.37238e-13	4.3847e-13
11	12000000	12000200	MergedBins_1629	194	*	3.90812	11.5732	1.56624	1.0511e-06	1.6906e-06
11	12000600	12001000	MergedBins_1630	334	*	4.46642	19.925	2.15739	1.44317e-14	5.14031e-14
11	12001400	12001800	MergedBins_1631	227	*	1.48881	13.5419	3.1852	1.51205e-13	4.81461e-13
11	12002800	12003000	MergedBins_1632	138	*	2.04711	8.2325	2.00774	2.4328e-06	3.79192e-06
11	12004600	12005200	MergedBins_1633	327	*	20.4711	19.5074	-0.0695638	0.70267	0.723099
11	12006000	12006400	MergedBins_1634	186	*	3.72202	11.096	1.57588	1.62836e-06	2.5718e-06
11	12009200	12009400	MergedBins_1635	173	*	7.44403	10.3204	0.471349	0.0733547	0.0828662
11	12009800	12010600	MergedBins_1636	642	*	16.9352	38.299	1.17728	9.6141e-14	3.14646e-13
11	12010800	12011400	MergedBins_1637	356	*	2.97761	21.2375	2.83438	4.46682e-19	2.42709e-18
11	12012400	12012800	MergedBins_1638	185	*	6.51353	11.0363	0.760748	0.00487223	0.00595243
11	12014600	12015000	MergedBins_1639	189	*	5.58303	11.2749	1.014	0.00035484	0.00046794
11	12016800	12017200	MergedBins_1640	254	*	12.841	15.1526	0.238809	0.247751	0.268357
11	12017800	12018200	MergedBins_1641	284	*	6.69963	16.9422	1.33847	7.91564e-08	1.42137e-07
11	12021600	12022000	MergedBins_1642	180	*	17.3074	10.738	-0.688657	0.000213147	0.000285553
11	12024000	12024200	MergedBins_1643	120	*	7.07183	7.15869	0.0176122	0.978304	0.985637
11	12036000	12036200	MergedBins_1644	145	*	13.7715	8.65009	-0.670895	0.00134748	0.00170469
11	12296000	12296400	MergedBins_1645	37	*	3.90812	2.20726	-0.824215	0.0492448	0.0563831
11	16735800	16736200	MergedBins_1646	0	*	0	0	0	1	1
11	17169800	17170000	MergedBins_1647	127	*	0.186101	7.57628	5.34733	2.55568e-14	8.85973e-14
11	17183400	17183600	MergedBins_1648	143	*	0.186101	8.53078	5.51852	4.40594e-16	1.82492e-15
11	18897600	18897800	MergedBins_1649	59	*	1.11661	3.51969	1.65633	0.00726995	0.008775
11	18979400	18979800	MergedBins_1650	182	*	3.16371	10.8574	1.77898	3.51555e-07	5.92184e-07
11	18983800	18984000	MergedBins_1651	129	*	3.90812	7.69559	0.977559	0.00451473	0.00553183
11	18985600	18986000	MergedBins_1652	253	*	11.3522	15.0929	0.410905	0.0526568	0.0601586
11	18986600	18986800	MergedBins_1653	24	*	0.930504	1.43174	0.621684	0.516211	0.539979
11	20089400	20089800	MergedBins_1654	321	*	0.744403	19.1495	4.68508	3.87722e-33	5.1262e-32
11	21100600	21101200	MergedBins_1655	382	*	2.23321	22.7885	3.35112	1.52108e-22	1.08768e-21
11	21122400	21122800	MergedBins_1656	330	*	4.28032	19.6864	2.20141	1.1612e-14	4.18752e-14
11	21252400	21252600	MergedBins_1657	11	*	0.186101	0.656214	1.81808	0.315356	0.337634
11	21344200	21345000	MergedBins_1658	483	*	4.28032	28.8137	2.75097	7.09934e-25	5.98199e-24
11	21557400	21557600	MergedBins_1659	200	*	51.3638	11.9312	-2.10602	1.47855e-65	5.0133e-64
11	21558400	21558600	MergedBins_1660	121	*	20.0989	7.21835	-1.47738	1.2321e-15	4.9002e-15
11	21778000	21778200	MergedBins_1661	123	*	0.186101	7.33766	5.30116	6.30183e-14	2.09708e-13
11	22025400	22026000	MergedBins_1662	300	*	5.02472	17.8967	1.83258	2.2122e-11	5.51389e-11
11	22026400	22027000	MergedBins_1663	617	*	5.95523	36.8076	2.62778	2.39933e-30	2.80443e-29
11	22027800	22028200	MergedBins_1664	220	*	1.30271	13.1243	3.33265	1.71532e-13	5.42664e-13
11	22030800	22031400	MergedBins_1665	338	*	7.07183	20.1637	1.5116	2.1861e-10	4.90525e-10
11	22032000	22032600	MergedBins_1666	1028	*	4.46642	61.3261	3.77931	6.71176e-62	2.14681e-60
11	22042600	22042800	MergedBins_1667	135	*	2.04711	8.05353	1.97603	3.81357e-06	5.83584e-06
11	22043600	22044000	MergedBins_1668	204	*	15.2603	12.1698	-0.326478	0.0958268	0.10718
11	22066800	22067200	MergedBins_1669	61	*	12.841	3.639	-1.81914	4.11289e-14	1.40002e-13
11	22068800	22070000	MergedBins_1670	949	*	5.76913	56.6133	3.29472	2.31594e-53	5.84995e-52
11	22070200	22071800	MergedBins_1671	2512	*	25.1236	149.855	2.57645	6.17445e-117	4.64771e-115
11	22072000	22072800	MergedBins_1672	684	*	10.2355	40.8045	1.99514	2.17057e-26	2.02377e-25
11	22079000	22079200	MergedBins_1673	122	*	11.7244	7.278	-0.687893	0.0025545	0.00318002
11	22080200	22080800	MergedBins_1674	271	*	6.14133	16.1667	1.3964	7.03495e-08	1.26888e-07
11	22084000	22085000	MergedBins_1675	594	*	4.28032	35.4355	3.04941	1.97769e-32	2.52033e-31
11	22085400	22086000	MergedBins_1676	845	*	6.32743	50.4091	2.99399	5.63467e-45	1.10453e-43
11	22086200	22086600	MergedBins_1677	287	*	1.30271	17.1212	3.7162	3.69685e-18	1.86344e-17
11	22087200	22087400	MergedBins_1678	119	*	3.53592	7.09904	1.00554	0.005446	0.00663116
11	22122400	22122600	MergedBins_1679	124	*	0.930504	7.39732	2.99092	4.19112e-10	9.11614e-10
11	22123000	22123600	MergedBins_1680	400	*	0.930504	23.8623	4.68058	6.87178e-41	1.18276e-39
11	22127200	22127600	MergedBins_1681	190	*	3.53592	11.3346	1.68058	4.67745e-07	7.78839e-07
11	22128400	22128800	MergedBins_1682	200	*	10.6077	11.9312	0.169615	0.477248	0.501033
11	22132800	22133000	MergedBins_1683	13	*	1.11661	0.775525	-0.525874	0.634719	0.656644
11	22151800	22152000	MergedBins_1684	179	*	8.18844	10.6784	0.383033	0.132481	0.146896
11	22161000	22161800	MergedBins_1685	815	*	12.6549	48.6195	1.94184	2.41577e-30	2.82073e-29
11	22162200	22162600	MergedBins_1686	169	*	2.60541	10.0818	1.95217	2.4817e-07	4.25331e-07
11	22164200	22164600	MergedBins_1687	231	*	2.79151	13.7805	2.30351	4.85933e-11	1.16613e-10
11	22165200	22166400	MergedBins_1688	1296	*	10.7938	77.3139	2.84052	9.51515e-66	3.23601e-64
11	22167400	22167800	MergedBins_1689	212	*	5.21082	12.647	1.27921	7.4524e-06	1.11406e-05
11	22168000	22168400	MergedBins_1690	317	*	15.0742	18.9109	0.327138	0.0772637	0.0871252
11	23379000	23379400	MergedBins_1691	237	*	4.65252	14.1384	1.60354	4.02075e-08	7.36985e-08
11	23397000	23397400	MergedBins_1692	216	*	3.34982	12.8856	1.94361	5.21712e-09	1.02786e-08
11	23571000	23571400	MergedBins_1693	221	*	4.46642	13.1839	1.56159	1.87523e-07	3.24443e-07
11	23606600	23606800	MergedBins_1694	10	*	0.372202	0.596558	0.680577	0.742337	0.761214
11	24098000	24098200	MergedBins_1695	120	*	0.930504	7.15869	2.94361	1.55395e-09	3.19186e-09
11	24113600	24114000	MergedBins_1696	185	*	6.51353	11.0363	0.760748	0.00487223	0.00595243
11	26401000	26401200	MergedBins_1697	119	*	1.11661	7.09904	2.6685	6.55676e-07	1.07595e-06
11	26444600	26444800	MergedBins_1698	144	*	0.558303	8.59043	3.94361	4.98234e-14	1.67877e-13
11	26445400	26445600	MergedBins_1699	125	*	0.186101	7.45697	5.32443	3.98646e-14	1.35739e-13
11	29143200	29143400	MergedBins_1700	133	*	1.30271	7.93422	2.60658	1.78271e-07	3.09099e-07
11	29185000	29185200	MergedBins_1701	133	*	0.744403	7.93422	3.41393	8.28605e-12	2.17071e-11
11	29186200	29186600	MergedBins_1702	236	*	6.69963	14.0788	1.07137	2.97058e-05	4.22855e-05
11	29706800	29707400	MergedBins_1703	234	*	86.723	13.9595	-2.63517	1.0985e-149	1.12756e-147
11	30099400	30099800	MergedBins_1704	246	*	89.1423	14.6753	-2.60272	2.33041e-151	2.45913e-149
11	30100000	30100800	MergedBins_1705	335	*	57.8774	19.9847	-1.5341	3.60158e-45	7.19742e-44
11	30106000	30106800	MergedBins_1706	508	*	20.8433	30.3051	0.539979	0.000371337	0.000488952
11	30109800	30110000	MergedBins_1707	259	*	46.7113	15.4508	-1.59609	3.96301e-39	6.4476e-38
11	30110600	30111000	MergedBins_1708	377	*	76.1152	22.4902	-1.75889	2.5612e-73	1.04399e-71
11	30112800	30113000	MergedBins_1709	155	*	45.2225	9.24664	-2.29004	3.13307e-65	1.05284e-63
11	30113800	30114000	MergedBins_1710	248	*	94.5392	14.7946	-2.67584	2.73815e-166	3.25436e-164
11	30114600	30115000	MergedBins_1711	260	*	81.5122	15.5105	-2.39377	8.08373e-124	6.47329e-122
11	30116600	30118600	MergedBins_1712	1263	*	228.904	75.3452	-1.60315	5.10422e-187	6.62434e-185
11	30119200	30119600	MergedBins_1713	170	*	51.3638	10.1415	-2.34048	3.5842e-76	1.52714e-74
11	30121000	30121200	MergedBins_1714	126	*	39.2673	7.51663	-2.38517	4.24682e-60	1.27529e-58
11	30121400	30121600	MergedBins_1715	134	*	38.8951	7.99387	-2.28262	4.80985e-56	1.29305e-54
11	30130800	30132400	MergedBins_1716	1074	*	6.88573	64.0703	3.21797	2.31025e-59	6.74032e-58
11	30133400	30133600	MergedBins_1717	124	*	0.372202	7.39732	4.31285	7.44847e-13	2.18411e-12
11	30137000	30137600	MergedBins_1718	385	*	87.2813	22.9675	-1.92608	1.6079e-96	9.81341e-95
11	30138200	30139400	MergedBins_1719	724	*	172.888	43.1908	-2.00104	5.53541e-201	8.01287e-199
11	30142200	30142600	MergedBins_1720	180	*	40.0117	10.738	-1.89769	4.75564e-44	9.10101e-43
11	30143000	30143200	MergedBins_1721	189	*	32.1954	11.2749	-1.51374	3.24273e-25	2.79494e-24
11	30144000	30144200	MergedBins_1722	145	*	18.9823	8.65009	-1.13387	7.0374e-10	1.49838e-09
11	30145800	30146200	MergedBins_1723	227	*	48.2001	13.5419	-1.83161	5.32358e-50	1.2368e-48
11	30146600	30147000	MergedBins_1724	254	*	65.3214	15.1526	-2.10799	4.37082e-83	2.16452e-81
11	30149400	30149600	MergedBins_1725	209	*	53.7831	12.4681	-2.10892	1.02937e-68	3.81069e-67
11	30149800	30150200	MergedBins_1726	172	*	32.9398	10.2608	-1.68269	2.11363e-30	2.48334e-29
11	30151400	30151800	MergedBins_1727	188	*	27.729	11.2153	-1.30593	2.37057e-17	1.11017e-16
11	30154200	30154400	MergedBins_1728	181	*	20.8433	10.7977	-0.94886	3.76079e-08	6.90119e-08
11	30155800	30156200	MergedBins_1729	197	*	10.7938	11.7522	0.12272	0.61951	0.641851
11	30157200	30157600	MergedBins_1730	279	*	4.09422	16.644	2.02334	1.06085e-11	2.74286e-11
11	30163600	30164000	MergedBins_1731	358	*	8.37454	21.3568	1.35061	1.20535e-09	2.51192e-09
11	30164600	30165000	MergedBins_1732	164	*	2.23321	9.78355	2.13124	1.07507e-07	1.9026e-07
11	30168800	30169400	MergedBins_1733	340	*	7.81624	20.283	1.37572	2.04645e-09	4.16558e-09
11	30176200	30176400	MergedBins_1734	150	*	5.21082	8.94837	0.780113	0.0101306	0.0121132
11	30184200	30184600	MergedBins_1735	347	*	21.0294	20.7006	-0.022738	0.92738	0.938519
11	30193800	30194000	MergedBins_1736	128	*	4.46642	7.63594	0.773687	0.0190112	0.0223436
11	30194400	30194600	MergedBins_1737	123	*	2.04711	7.33766	1.84173	2.26673e-05	3.25661e-05
11	30197400	30197600	MergedBins_1738	122	*	15.0742	7.278	-1.05046	3.19879e-07	5.42061e-07
11	30199200	30199600	MergedBins_1739	185	*	3.16371	11.0363	1.80257	2.27884e-07	3.91634e-07
11	30200600	30202800	MergedBins_1740	2636	*	21.4016	157.253	2.87729	3.27619e-133	2.95932e-131
11	30204800	30206200	MergedBins_1741	815	*	22.5182	48.6195	1.11044	7.69013e-16	3.11105e-15
11	30213600	30214000	MergedBins_1742	154	*	7.25793	9.18699	0.340033	0.217237	0.236485
11	30215400	30216200	MergedBins_1743	479	*	10.7938	28.5751	1.40455	4.75327e-13	1.42434e-12
11	30216800	30217000	MergedBins_1744	144	*	7.07183	8.59043	0.280647	0.326152	0.348796
11	30234600	30234800	MergedBins_1745	140	*	4.09422	8.35181	1.0285	0.0020485	0.00256312
11	30235200	30236000	MergedBins_1746	483	*	6.69963	28.8137	2.1046	5.11414e-20	3.02482e-19
11	30256400	30257000	MergedBins_1747	332	*	17.6796	19.8057	0.163833	0.357529	0.380729
11	30259200	30259400	MergedBins_1748	44	*	5.02472	2.62485	-0.936807	0.0103273	0.0123457
11	30548800	30549200	MergedBins_1749	19	*	1.11661	1.13346	0.0216141	0.840504	0.855584
11	30599000	30599400	MergedBins_1750	166	*	4.46642	9.90286	1.14873	0.000253636	0.000338191
11	30782400	30782800	MergedBins_1751	189	*	0.744403	11.2749	3.92089	4.2459e-18	2.12314e-17
11	30861800	30862200	MergedBins_1752	347	*	8.00234	20.7006	1.37118	1.50776e-09	3.10887e-09
11	35264600	35265000	MergedBins_1753	200	*	0.744403	11.9312	4.00251	2.91558e-19	1.61293e-18
11	35281000	35281200	MergedBins_1754	132	*	0.372202	7.87456	4.40304	1.29996e-13	4.16631e-13
11	35336800	35337000	MergedBins_1755	138	*	2.04711	8.2325	2.00774	2.4328e-06	3.79192e-06
11	40702200	40702600	MergedBins_1756	198	*	5.02472	11.8118	1.23312	2.48025e-05	3.55117e-05
11	43687800	43688200	MergedBins_1757	196	*	5.21082	11.6925	1.166	5.52289e-05	7.70911e-05
11	43696200	43696400	MergedBins_1758	145	*	1.67491	8.65009	2.36863	1.60095e-07	2.78569e-07
11	43698200	43698400	MergedBins_1759	42	*	0.186101	2.50554	3.75097	0.000130883	0.000178284
11	44462800	44463200	MergedBins_1760	222	*	2.41931	13.2436	2.45263	3.46446e-11	8.45048e-11
11	44529200	44529600	MergedBins_1761	174	*	1.30271	10.3801	2.99424	2.66852e-10	5.92765e-10
11	44651800	44652000	MergedBins_1762	92	*	12.6549	5.48833	-1.20525	1.25757e-07	2.21309e-07
11	44662000	44662200	MergedBins_1763	259	*	13.0271	15.4508	0.246174	0.228613	0.248438
11	44664200	44664400	MergedBins_1764	158	*	0.930504	9.42561	3.3405	1.32214e-13	4.23138e-13
11	44687600	44688000	MergedBins_1765	255	*	2.04711	15.2122	2.89357	3.21132e-14	1.10109e-13
11	44688200	44688800	MergedBins_1766	418	*	2.60541	24.9361	3.25865	3.64477e-24	2.88793e-23
11	44737400	44737600	MergedBins_1767	137	*	4.83862	8.17284	0.756241	0.016976	0.0200121
11	44742000	44742400	MergedBins_1768	210	*	13.2132	12.5277	-0.0768525	0.750097	0.768822
11	44744600	44745000	MergedBins_1769	162	*	1.86101	9.66424	2.37657	2.72894e-08	5.06285e-08
11	44747600	44747800	MergedBins_1770	143	*	0.930504	8.53078	3.19659	3.99572e-12	1.08295e-11
11	44748400	44748800	MergedBins_1771	174	*	2.04711	10.3801	2.34216	1.01134e-08	1.9513e-08
11	44750200	44750400	MergedBins_1772	135	*	2.23321	8.05353	1.8505	8.20093e-06	1.22192e-05
11	44751000	44751400	MergedBins_1773	226	*	1.86101	13.4822	2.8569	1.21523e-12	3.47501e-12
11	44754400	44754600	MergedBins_1774	191	*	0.372202	11.3943	4.93608	1.49561e-20	9.21271e-20
11	44756800	44757000	MergedBins_1775	162	*	1.30271	9.66424	2.89114	1.80219e-09	3.68968e-09
11	44765600	44765800	MergedBins_1776	186	*	1.11661	11.096	3.31285	1.4675e-11	3.73104e-11
11	44771800	44772200	MergedBins_1777	279	*	2.60541	16.644	2.67542	1.20362e-14	4.32944e-14
11	44782600	44782800	MergedBins_1778	55	*	2.04711	3.28107	0.680577	0.194288	0.212343
11	44841800	44842000	MergedBins_1779	157	*	1.48881	9.36596	2.65327	1.00856e-08	1.94728e-08
11	46061200	46061400	MergedBins_1780	122	*	8.56064	7.278	-0.234175	0.395767	0.419626
11	46080600	46081200	MergedBins_1781	294	*	8.56064	17.5388	1.03476	5.1665e-06	7.82495e-06
11	46085000	46085200	MergedBins_1782	156	*	1.48881	9.3063	2.64405	1.18055e-08	2.26346e-08
11	46092400	46092600	MergedBins_1783	138	*	0.930504	8.2325	3.14525	1.42426e-11	3.62599e-11
11	46145400	46145800	MergedBins_1784	226	*	5.21082	13.4822	1.37147	1.21932e-06	1.94922e-06
11	46146400	46147000	MergedBins_1785	319	*	15.0742	19.0302	0.336212	0.0689139	0.0779588
11	47015800	47016000	MergedBins_1786	122	*	1.67491	7.278	2.11946	5.51287e-06	8.3183e-06
11	47031600	47031800	MergedBins_1787	121	*	0.372202	7.21835	4.27751	1.83682e-12	5.15523e-12
11	47037800	47038200	MergedBins_1788	194	*	1.11661	11.5732	3.3736	4.06336e-12	1.0997e-11
11	47055600	47056000	MergedBins_1789	144	*	2.79151	8.59043	1.62168	1.93584e-05	2.80045e-05
11	47056400	47056600	MergedBins_1790	122	*	0.558303	7.278	3.70442	1.59121e-11	4.02473e-11
11	47070800	47071200	MergedBins_1791	184	*	1.11661	10.9767	3.29725	2.02281e-11	5.07206e-11
11	47073000	47073400	MergedBins_1792	225	*	6.69963	13.4225	1.00251	0.000105626	0.000144718
11	47095600	47095800	MergedBins_1793	120	*	1.48881	7.15869	2.26554	3.26773e-06	5.02875e-06
11	47142200	47142400	MergedBins_1794	6	*	0.186101	0.357935	0.943612	1	1
11	47272400	47272600	MergedBins_1795	201	*	2.60541	11.9908	2.20235	2.03097e-09	4.13632e-09
11	47273600	47274000	MergedBins_1796	217	*	3.34982	12.9453	1.95028	4.50246e-09	8.90944e-09
11	47284800	47285200	MergedBins_1797	165	*	2.04711	9.8432	2.26554	4.03374e-08	7.39006e-08
11	47285600	47286000	MergedBins_1798	276	*	5.02472	16.465	1.71229	6.80299e-10	1.45066e-09
11	47326800	47327000	MergedBins_1799	120	*	0.186101	7.15869	5.26554	1.59518e-13	5.06359e-13
11	47330000	47330200	MergedBins_1800	147	*	0.372202	8.7694	4.55832	2.11712e-15	8.2372e-15
11	47332200	47332600	MergedBins_1801	142	*	0.930504	8.47112	3.18647	6.11162e-12	1.63174e-11
11	47332800	47333200	MergedBins_1802	223	*	1.86101	13.3032	2.83762	1.95105e-12	5.46905e-12
11	49205000	49205200	MergedBins_1803	144	*	3.34982	8.59043	1.35865	0.000135568	0.000184422
11	49208600	49209000	MergedBins_1804	77	*	9.86334	4.59349	-1.10248	1.83307e-05	2.6562e-05
11	49209400	49209800	MergedBins_1805	169	*	0.930504	10.0818	3.4376	6.33051e-15	2.35357e-14
11	50040400	50040800	MergedBins_1806	7	*	0.558303	0.41759	-0.418958	0.713284	0.733487
11	50285800	50286000	MergedBins_1807	127	*	1.86101	7.57628	2.02541	5.77138e-06	8.6951e-06
11	50297000	50297400	MergedBins_1808	256	*	143.856	15.2719	-3.23568	0	0
11	50298000	50298400	MergedBins_1809	210	*	146.089	12.5277	-3.54365	0	0
11	51597000	51597200	MergedBins_1810	27	*	3.72202	1.61071	-1.20839	0.00591025	0.00718327
11	52379400	52379800	MergedBins_1811	154	*	0.744403	9.18699	3.62544	4.53402e-14	1.53504e-13
11	52385600	52385800	MergedBins_1812	183	*	15.2603	10.917	-0.483203	0.0138726	0.0164724
11	52387400	52387600	MergedBins_1813	169	*	12.6549	10.0818	-0.327934	0.130916	0.145189
11	52388400	52388600	MergedBins_1814	140	*	9.67724	8.35181	-0.212508	0.410124	0.434044
11	52388800	52389400	MergedBins_1815	723	*	62.5299	43.1311	-0.535816	1.88967e-08	3.56138e-08
11	53354800	53355000	MergedBins_1816	121	*	2.23321	7.21835	1.69255	6.29656e-05	8.76087e-05
11	53377200	53377800	MergedBins_1817	596	*	3.34982	35.5548	3.40789	1.04939e-34	1.47923e-33
11	53385400	53385800	MergedBins_1818	188	*	1.11661	11.2153	3.32828	1.06459e-11	2.75126e-11
11	53387200	53387400	MergedBins_1819	219	*	1.30271	13.0646	3.32608	2.01316e-13	6.31755e-13
11	53409600	53409800	MergedBins_1820	129	*	1.86101	7.69559	2.04795	4.2677e-06	6.50642e-06
11	53410400	53410800	MergedBins_1821	307	*	11.3522	18.3143	0.690007	0.000715188	0.000925099
11	54443200	54443600	MergedBins_1822	239	*	2.79151	14.2577	2.35263	1.42823e-11	3.63529e-11
11	54462800	54463600	MergedBins_1823	611	*	2.04711	36.4497	4.15425	6.77686e-39	1.09155e-37
11	54463800	54464200	MergedBins_1824	293	*	2.23321	17.4791	2.96844	2.06078e-16	8.85396e-16
11	54464400	54465000	MergedBins_1825	409	*	2.97761	24.3992	3.03461	1.06783e-22	7.70903e-22
11	54574000	54574200	MergedBins_1826	125	*	0.372202	7.45697	4.32443	7.76831e-13	2.2688e-12
11	54575200	54575600	MergedBins_1827	225	*	2.60541	13.4225	2.36508	5.19329e-11	1.24232e-10
11	54582400	54582800	MergedBins_1828	204	*	0.744403	12.1698	4.03107	1.23928e-19	7.11738e-19
11	54604200	54604400	MergedBins_1829	121	*	0.558303	7.21835	3.69255	2.66478e-11	6.58093e-11
11	54606200	54606600	MergedBins_1830	272	*	0.186101	16.2264	6.44611	1.25247e-31	1.55062e-30
11	54777400	54777800	MergedBins_1831	291	*	2.23321	17.3598	2.95856	2.82625e-16	1.19652e-15
11	54910000	54910400	MergedBins_1832	208	*	40.9422	12.4084	-1.72227	7.87199e-39	1.26433e-37
11	55014800	55015000	MergedBins_1833	128	*	5.58303	7.63594	0.451759	0.145044	0.160197
11	55394400	55396000	MergedBins_1834	868	*	204.339	51.7812	-1.98046	1.56423e-233	2.63609e-231
11	55404000	55404600	MergedBins_1835	397	*	5.02472	23.6833	2.23676	1.30328e-17	6.26186e-17
11	58985600	58986000	MergedBins_1836	208	*	1.11661	12.4084	3.47413	4.28861e-13	1.29785e-12
11	58991000	58991200	MergedBins_1837	125	*	5.95523	7.45697	0.324433	0.296293	0.318341
11	59057200	59058200	MergedBins_1838	922	*	7.81624	55.0026	2.81495	6.29086e-47	1.34272e-45
11	59058400	59060400	MergedBins_1839	3037	*	43.7337	181.175	2.05056	6.43116e-115	4.65476e-113
11	59101200	59101400	MergedBins_1840	119	*	1.11661	7.09904	2.6685	6.55676e-07	1.07595e-06
11	59119400	59119800	MergedBins_1841	191	*	9.49114	11.3943	0.263653	0.277434	0.298903
11	59120400	59121000	MergedBins_1842	320	*	35.3592	19.0898	-0.889278	1.15507e-11	2.97149e-11
11	59212000	59212400	MergedBins_1843	167	*	55.6441	9.96251	-2.48165	3.01062e-89	1.65014e-87
11	59665600	59665800	MergedBins_1844	158	*	0.744403	9.42561	3.66243	1.19386e-14	4.29843e-14
11	59705000	59705400	MergedBins_1845	164	*	1.67491	9.78355	2.54628	8.29839e-09	1.61269e-08
11	59722400	59722600	MergedBins_1846	121	*	2.04711	7.21835	1.81808	3.04237e-05	4.32637e-05
11	59853800	59854000	MergedBins_1847	128	*	3.16371	7.63594	1.27119	0.000608042	0.000788854
11	60111200	60111600	MergedBins_1848	338	*	10.0494	20.1637	1.00464	1.67258e-06	2.64016e-06
11	60116000	60116400	MergedBins_1849	240	*	12.6549	14.3174	0.178077	0.405056	0.429113
11	60117400	60117600	MergedBins_1850	129	*	1.67491	7.69559	2.19995	1.88965e-06	2.97076e-06
11	60119000	60119200	MergedBins_1851	125	*	2.23321	7.45697	1.73947	3.53331e-05	5.00058e-05
11	60124200	60124400	MergedBins_1852	121	*	2.41931	7.21835	1.57707	0.000126141	0.000172053
11	60127600	60127800	MergedBins_1853	125	*	7.81624	7.45697	-0.067884	0.862176	0.875985
11	60134800	60135400	MergedBins_1854	316	*	9.30504	18.8512	1.01857	2.94197e-06	4.54975e-06
11	60139000	60139200	MergedBins_1855	134	*	3.34982	7.99387	1.25481	0.000500636	0.000652961
11	60148200	60148400	MergedBins_1856	131	*	2.79151	7.81491	1.48518	0.000118522	0.000162013
11	60181800	60182200	MergedBins_1857	186	*	0.930504	11.096	3.57588	1.32735e-16	5.80895e-16
11	60236600	60237200	MergedBins_1858	409	*	14.1437	24.3992	0.786679	1.26115e-05	1.85146e-05
11	60314600	60314800	MergedBins_1859	131	*	5.58303	7.81491	0.485182	0.114684	0.127752
11	60322000	60322400	MergedBins_1860	209	*	9.67724	12.4681	0.365569	0.11704	0.1303
11	60323200	60323400	MergedBins_1861	163	*	8.37454	9.72389	0.215524	0.419607	0.443281
11	60338400	60338600	MergedBins_1862	159	*	1.86101	9.48527	2.3496	4.33943e-08	7.92695e-08
11	60419800	60420000	MergedBins_1863	161	*	1.11661	9.60458	3.1046	8.07365e-10	1.71127e-09
11	60874000	60874400	MergedBins_1864	243	*	2.60541	14.4964	2.47611	3.23965e-12	8.84617e-12
11	61488000	61488600	MergedBins_1865	373	*	25.1236	22.2516	-0.175135	0.247017	0.267588
11	62323200	62323600	MergedBins_1866	201	*	4.83862	11.9908	1.30926	9.51379e-06	1.41138e-05
11	62355800	62356000	MergedBins_1867	145	*	0.744403	8.65009	3.53856	3.9337e-13	1.19557e-12
11	62411800	62412200	MergedBins_1868	177	*	1.11661	10.5591	3.24129	6.21735e-11	1.47541e-10
11	62413200	62414200	MergedBins_1869	537	*	5.02472	32.0352	2.67254	6.23881e-27	5.97983e-26
11	62415200	62415400	MergedBins_1870	153	*	0.186101	9.12733	5.61604	2.66014e-17	1.2396e-16
11	63988000	63988400	MergedBins_1871	218	*	2.97761	13.005	2.12683	7.99408e-10	1.69632e-09
11	64069000	64069400	MergedBins_1872	484	*	2.79151	28.8734	3.37062	2.76451e-28	2.86367e-27
11	65046400	65046600	MergedBins_1873	146	*	0.186101	8.70974	5.54847	1.64183e-16	7.11699e-16
11	65133600	65134000	MergedBins_1874	258	*	0.372202	15.3912	5.36988	2.64903e-28	2.75417e-27
11	65148200	65148600	MergedBins_1875	186	*	4.65252	11.096	1.25395	3.63259e-05	5.13723e-05
11	65201400	65201800	MergedBins_1876	350	*	18.6101	20.8795	0.166004	0.336867	0.359777
11	65207200	65207600	MergedBins_1877	256	*	1.30271	15.2719	3.55129	5.35216e-16	2.1975e-15
11	65208000	65208400	MergedBins_1878	267	*	2.04711	15.9281	2.95991	4.82529e-15	1.81729e-14
11	65210200	65210600	MergedBins_1879	203	*	5.21082	12.1101	1.21663	2.32119e-05	3.3285e-05
11	65211000	65211400	MergedBins_1880	183	*	2.04711	10.917	2.41492	2.51932e-09	5.07596e-09
11	65211600	65211800	MergedBins_1881	125	*	1.11661	7.45697	2.73947	2.52804e-07	4.32946e-07
11	65212000	65213000	MergedBins_1882	525	*	7.44403	31.3193	2.07289	2.44907e-21	1.6033e-20
11	65213400	65214200	MergedBins_1883	689	*	17.1213	41.1028	1.26345	5.3767e-16	2.20677e-15
11	65214600	65214800	MergedBins_1884	130	*	0.930504	7.75525	3.05909	1.20159e-10	2.76485e-10
11	65216600	65217000	MergedBins_1885	151	*	1.86101	9.00802	2.27513	1.48919e-07	2.60527e-07
11	65218000	65218200	MergedBins_1886	123	*	1.30271	7.33766	2.49381	8.60242e-07	1.39314e-06
11	65230400	65230800	MergedBins_1887	315	*	8.74674	18.7916	1.10327	7.44714e-07	1.21476e-06
11	65232800	65233200	MergedBins_1888	332	*	6.69963	19.8057	1.56376	1.33311e-10	3.05503e-10
11	65234600	65235000	MergedBins_1889	316	*	5.58303	18.8512	1.75554	1.98502e-11	4.98395e-11
11	65235400	65236600	MergedBins_1890	792	*	4.09422	47.2474	3.52857	1.782e-46	3.7679e-45
11	65236800	65237400	MergedBins_1891	437	*	14.1437	26.0696	0.882211	7.58187e-07	1.23549e-06
11	65238200	65239000	MergedBins_1892	791	*	14.8881	47.1877	1.66425	4.28905e-25	3.67154e-24
11	65239200	65239800	MergedBins_1893	394	*	9.67724	23.5044	1.28026	7.33258e-10	1.56005e-09
11	65241000	65241600	MergedBins_1894	506	*	39.8256	30.1858	-0.399824	0.00076222	0.000982783
11	65244000	65244600	MergedBins_1895	338	*	23.6348	20.1637	-0.229156	0.140572	0.155516
11	65245000	65245400	MergedBins_1896	153	*	5.58303	9.12733	0.709146	0.0163772	0.0193365
11	65246000	65246600	MergedBins_1897	466	*	21.9599	27.7996	0.340192	0.024756	0.028876
11	65246800	65247200	MergedBins_1898	197	*	4.83862	11.7522	1.28026	1.59013e-05	2.31667e-05
11	65247800	65250200	MergedBins_1899	2762	*	102.355	164.769	0.686859	9.29322e-25	7.73818e-24
11	65250400	65251400	MergedBins_1900	522	*	24.5653	31.1403	0.342161	0.0166418	0.0196386
11	65251600	65252800	MergedBins_1901	1498	*	16.7491	89.3643	2.41562	8.53704e-67	2.97505e-65
11	65253200	65254400	MergedBins_1902	1254	*	35.7314	74.8083	1.06601	2.41513e-22	1.70007e-21
11	65256600	65257400	MergedBins_1903	558	*	14.8881	33.2879	1.16084	6.53281e-12	1.74049e-11
11	65257800	65258200	MergedBins_1904	174	*	9.67724	10.3801	0.101153	0.714251	0.734415
11	65259400	65259800	MergedBins_1905	211	*	9.30504	12.5874	0.435892	0.0634443	0.0719588
11	65260800	65261200	MergedBins_1906	281	*	67.3685	16.7633	-2.00677	1.26102e-79	5.69529e-78
11	65261600	65262000	MergedBins_1907	284	*	33.8704	16.9422	-0.999398	1.48504e-13	4.73526e-13
11	65262600	65262800	MergedBins_1908	130	*	3.90812	7.75525	0.9887	0.00402217	0.00494278
11	65264000	65264400	MergedBins_1909	220	*	18.0518	13.1243	-0.459904	0.0104329	0.0124707
11	65267000	65267400	MergedBins_1910	183	*	2.79151	10.917	1.96746	6.75373e-08	1.21952e-07
11	65355400	65355600	MergedBins_1911	138	*	3.90812	8.2325	1.07486	0.00156513	0.00197252
11	65358600	65358800	MergedBins_1912	133	*	2.41931	7.93422	1.71349	2.2832e-05	3.27869e-05
11	65694800	65695200	MergedBins_1913	12	*	0.372202	0.715869	0.943612	0.540031	0.563591
11	65759400	65759600	MergedBins_1914	171	*	3.72202	10.2011	1.45457	1.27117e-05	1.86521e-05
11	65769400	65769600	MergedBins_1915	124	*	4.46642	7.39732	0.727883	0.0284782	0.0330504
11	68299000	68299400	MergedBins_1916	428	*	2.79151	25.5327	3.19323	2.00128e-24	1.62214e-23
11	68309600	68309800	MergedBins_1917	146	*	0.186101	8.70974	5.54847	1.64183e-16	7.11699e-16
11	68326600	68327000	MergedBins_1918	163	*	2.97761	9.72389	1.70738	2.62127e-06	4.07164e-06
11	68335400	68335600	MergedBins_1919	138	*	2.97761	8.2325	1.46717	8.67683e-05	0.000119534
11	68337600	68337800	MergedBins_1920	125	*	1.48881	7.45697	2.32443	1.50631e-06	2.38538e-06
11	68341600	68342000	MergedBins_1921	229	*	2.60541	13.6612	2.3905	2.80789e-11	6.92526e-11
11	68344000	68344400	MergedBins_1922	219	*	2.41931	13.0646	2.433	5.50761e-11	1.31278e-10
11	68346800	68347200	MergedBins_1923	251	*	5.95523	14.9736	1.33019	5.20599e-07	8.63535e-07
11	68347400	68347600	MergedBins_1924	170	*	1.86101	10.1415	2.44611	7.89507e-09	1.53642e-08
11	68368400	68368800	MergedBins_1925	256	*	2.79151	15.2719	2.45176	1.04542e-12	3.02428e-12
11	68369000	68369600	MergedBins_1926	292	*	2.23321	17.4195	2.96351	2.41338e-16	1.02906e-15
11	68370000	68370400	MergedBins_1927	215	*	2.23321	12.826	2.52188	4.24527e-11	1.02487e-10
11	68382200	68382600	MergedBins_1928	310	*	7.25793	18.4933	1.34937	1.64716e-08	3.12101e-08
11	68740800	68741400	MergedBins_1929	364	*	3.34982	21.7147	2.69652	8.13342e-19	4.34822e-18
11	68777400	68777800	MergedBins_1930	173	*	4.46642	10.3204	1.20831	0.000106474	0.000145845
11	68829200	68829400	MergedBins_1931	129	*	0.186101	7.69559	5.36988	1.66157e-14	5.88482e-14
11	69090800	69091600	MergedBins_1932	846	*	4.83862	50.4688	3.38272	1.91235e-48	4.28419e-47
11	69554000	69554400	MergedBins_1933	212	*	3.16371	12.647	1.99911	4.3431e-09	8.60617e-09
11	69599800	69600600	MergedBins_1934	809	*	5.95523	48.2615	3.01865	2.36186e-43	4.41519e-42
11	69600800	69601600	MergedBins_1935	346	*	3.72202	20.6409	2.47135	7.92395e-17	3.53913e-16
11	69635000	69635400	MergedBins_1936	312	*	1.48881	18.6126	3.64405	1.8832e-19	1.06563e-18
11	69637000	69637200	MergedBins_1937	128	*	1.67491	7.63594	2.18872	2.20281e-06	3.44439e-06
11	69637400	69637600	MergedBins_1938	131	*	2.97761	7.81491	1.39207	0.000223926	0.000299674
11	69780200	69780400	MergedBins_1939	133	*	0.186101	7.93422	5.41393	3.98776e-15	1.51551e-14
11	69919000	69919400	MergedBins_1940	62	*	3.34982	3.69866	0.14292	0.810508	0.827063
11	70659400	70659800	MergedBins_1941	315	*	5.58303	18.7916	1.75097	2.28802e-11	5.69408e-11
11	70660000	70660400	MergedBins_1942	206	*	4.83862	12.2891	1.34471	4.9754e-06	7.53956e-06
11	70701800	70702200	MergedBins_1943	197	*	4.46642	11.7522	1.39574	4.80968e-06	7.29528e-06
11	70849800	70850200	MergedBins_1944	39	*	0.744403	2.32658	1.64405	0.0199754	0.0234451
11	72185800	72186000	MergedBins_1945	124	*	2.23321	7.39732	1.72788	4.0839e-05	5.75312e-05
11	72620600	72620800	MergedBins_1946	121	*	2.60541	7.21835	1.47016	0.000244805	0.000326802
11	72625400	72625600	MergedBins_1947	119	*	4.46642	7.09904	0.668504	0.0463851	0.0531764
11	72644800	72645000	MergedBins_1948	166	*	15.6325	9.90286	-0.658629	0.000764214	0.000985241
11	74679400	74679800	MergedBins_1949	143	*	26.7985	8.53078	-1.6514	2.83586e-24	2.2709e-23
11	74682200	74682400	MergedBins_1950	150	*	23.6348	8.94837	-1.40122	9.99739e-17	4.41457e-16
11	74683400	74683600	MergedBins_1951	139	*	10.9799	8.29215	-0.405053	0.0836328	0.0941098
11	75057600	75058000	MergedBins_1952	197	*	4.09422	11.7522	1.52127	1.34857e-06	2.14763e-06
11	75058400	75058600	MergedBins_1953	127	*	0.558303	7.57628	3.76237	4.20493e-12	1.13478e-11
11	75091400	75091600	MergedBins_1954	123	*	4.46642	7.33766	0.716201	0.0314466	0.0363943
11	75331400	75331800	MergedBins_1955	203	*	9.49114	12.1101	0.35156	0.137163	0.151878
11	75338400	75338800	MergedBins_1956	185	*	2.41931	11.0363	2.18959	1.00954e-08	1.94883e-08
11	75751800	75752000	MergedBins_1957	123	*	40.57	7.33766	-2.46702	6.16596e-65	2.05976e-63
11	75756800	75757000	MergedBins_1958	134	*	24.007	7.99387	-1.58649	1.41233e-20	8.71399e-20
11	75759200	75759400	MergedBins_1959	130	*	33.4982	7.75525	-2.11084	2.21088e-43	4.13981e-42
11	75764600	75764800	MergedBins_1960	94	*	22.5182	5.60764	-2.00563	1.6722e-27	1.66059e-26
11	76134800	76135000	MergedBins_1961	130	*	0.372202	7.75525	4.38102	1.97705e-13	6.20942e-13
11	76386600	76387000	MergedBins_1962	201	*	10.6077	11.9908	0.176811	0.45651	0.480423
11	76779800	76780200	MergedBins_1963	201	*	8.18844	11.9908	0.550269	0.0256785	0.0299027
11	76820000	76820200	MergedBins_1964	126	*	2.97761	7.51663	1.33593	0.000436096	0.000571225
11	77220800	77221200	MergedBins_1965	202	*	1.86101	12.0505	2.69493	5.32015e-11	1.26998e-10
11	77262400	77263000	MergedBins_1966	407	*	2.41931	24.2799	3.32709	7.74311e-24	6.02533e-23
11	77263400	77263600	MergedBins_1967	126	*	0.558303	7.51663	3.75097	6.93829e-12	1.83605e-11
11	77264800	77265000	MergedBins_1968	122	*	1.86101	7.278	1.96746	1.22392e-05	1.79986e-05
11	77266200	77266600	MergedBins_1969	135	*	1.67491	8.05353	2.26554	7.5116e-07	1.22439e-06
11	77267200	77267800	MergedBins_1970	257	*	0.930504	15.3315	4.04235	1.13339e-24	9.38889e-24
11	77368000	77368200	MergedBins_1971	125	*	1.48881	7.45697	2.32443	1.50631e-06	2.38538e-06
11	77383400	77383600	MergedBins_1972	3	*	1.11661	0.178967	-2.64135	0.00857294	0.0102987
11	77504800	77505200	MergedBins_1973	8	*	3.72202	0.477246	-2.96328	2.15139e-08	4.03443e-08
11	77533200	77533400	MergedBins_1974	22	*	0.930504	1.31243	0.496153	0.654123	0.675913
11	77803200	77803800	MergedBins_1975	629	*	3.16371	37.5235	3.5681	2.00129e-37	3.07436e-36
11	77805600	77806000	MergedBins_1976	280	*	10.6077	16.7036	0.655042	0.00201496	0.00252256
11	77806200	77806600	MergedBins_1977	182	*	18.2379	10.8574	-0.748266	3.84805e-05	5.43648e-05
11	77807000	77807200	MergedBins_1978	188	*	3.53592	11.2153	1.66531	6.20668e-07	1.02231e-06
11	77834000	77834400	MergedBins_1979	366	*	1.30271	21.834	4.06699	1.13641e-23	8.75851e-23
11	77835600	77836000	MergedBins_1980	215	*	0.372202	12.826	5.10684	2.47557e-23	1.86842e-22
11	77837400	77837800	MergedBins_1981	409	*	13.2132	24.3992	0.884859	1.64704e-06	2.60094e-06
11	78108000	78108400	MergedBins_1982	240	*	3.53592	14.3174	2.01761	3.26428e-10	7.18039e-10
11	78108800	78109200	MergedBins_1983	199	*	6.14133	11.8715	0.95088	0.00047601	0.000621775
11	78111200	78111600	MergedBins_1984	254	*	2.79151	15.1526	2.44044	1.42309e-12	4.05248e-12
11	78114400	78114600	MergedBins_1985	159	*	4.46642	9.48527	1.08657	0.000592765	0.000770007
11	78125400	78125800	MergedBins_1986	12	*	1.30271	0.715869	-0.863743	0.312406	0.33476
11	78143800	78144000	MergedBins_1987	2	*	0.186101	0.119312	-0.641351	0.56576	0.588973
11	78582200	78582400	MergedBins_1988	49	*	5.39692	2.92313	-0.884622	0.0115262	0.0137382
11	78662600	78662800	MergedBins_1989	135	*	0.930504	8.05353	3.11354	3.34192e-11	8.17629e-11
11	78664400	78664600	MergedBins_1990	78	*	2.79151	4.65315	0.737161	0.0870458	0.0977361
11	78667800	78668000	MergedBins_1991	135	*	0.372202	8.05353	4.43546	5.03696e-14	1.69212e-13
11	78685600	78686000	MergedBins_1992	253	*	3.16371	15.0929	2.25418	9.15347e-12	2.3924e-11
11	79145000	79145200	MergedBins_1993	77	*	4.83862	4.59349	-0.075004	0.908983	0.921221
11	79479600	79480000	MergedBins_1994	167	*	1.48881	9.96251	2.74235	2.08332e-09	4.23605e-09
11	79482200	79482400	MergedBins_1995	139	*	0.372202	8.29215	4.47759	2.1769e-14	7.62624e-14
11	79516400	79516600	MergedBins_1996	65	*	2.04711	3.87763	0.921585	0.0630211	0.0715075
11	80260200	80260600	MergedBins_1997	233	*	4.09422	13.8998	1.7634	8.67568e-09	1.68282e-08
11	80261400	80262000	MergedBins_1998	522	*	4.65252	31.1403	2.7427	1.03034e-26	9.82561e-26
11	80262400	80263200	MergedBins_1999	937	*	5.76913	55.8975	3.27636	1.54428e-52	3.80709e-51
[truncated: 9,292 more rows]

## Sheet: Peaks_annotation_Matr3_WT
chr	start	end	peak_name	-log10_bestFDR	strand	gene_name	gene_id	gene_biotype	region
6	118957000	118964800	Peak_1	350	.	Cacna1c	ENSMUSG00000051331	protein_coding	intronic
3	59133000	59133200	Peak_2	350	.	P2ry14,Med12l	ENSMUSG00000036381,ENSMUSG00000056476	protein_coding	intronic
7	44481800	44483200	Peak_3	350	.	Charme	CUFF405	lincRNA	exonic
10	24165600	24166200	Peak_4	350	.	Stx7	ENSMUSG00000019998	protein_coding	intronic
2	45065000	45065400	Peak_5	350	.	Zeb2	ENSMUSG00000026872	protein_coding	intronic
7	44484000	44484800	Peak_6	350	.	Charme	CUFF405	lincRNA	exonic
17	81635000	81637200	Peak_7	350	.	Slc8a1	ENSMUSG00000054640	protein_coding	intronic
16	6824400	6824800	Peak_8	350	.	Rbfox1	ENSMUSG00000008658	protein_coding	intronic
5	121758400	121759000	Peak_9	350	.	Atxn2	ENSMUSG00000042605	protein_coding	intronic
17	81463600	81466000	Peak_10	350	.	Slc8a1	ENSMUSG00000054640	protein_coding	intronic
8	45751600	45756200	Peak_11	350	.	Sorbs2,Sorbs2os	ENSMUSG00000031626,ENSMUSG00000085440	protein_coding,antisense	intronic
6	94216200	94216600	Peak_12	350	.	Magi1	ENSMUSG00000045095	protein_coding	intronic
17	81578200	81584600	Peak_13	350	.	Slc8a1	ENSMUSG00000054640	protein_coding	intronic
11	108237400	108237800	Peak_14	312	.	Prkca	ENSMUSG00000050965	protein_coding	intronic
3	59132400	59132800	Peak_15	310.803	.	P2ry14,Med12l	ENSMUSG00000036381,ENSMUSG00000056476	protein_coding	intronic
5	23428400	23429200	Peak_16	307.78	.	5031425E22Rik	ENSMUSG00000073147	lincRNA	intronic
6	119122800	119127200	Peak_17	306.216	.	Cacna1c	ENSMUSG00000051331	protein_coding	intronic
X	151414800	151415200	Peak_18	298.898	.	Fam120c	ENSMUSG00000025262	protein_coding	intronic
18	5006800	5007200	Peak_19	297.463	.	Svil	ENSMUSG00000024236	protein_coding	intronic
X	141519600	141519800	Peak_20	295.658	.	Col4a5	ENSMUSG00000031274	protein_coding	intronic
4	44769000	44769400	Peak_21	292.689	.	Zcchc7	ENSMUSG00000035649	protein_coding	intronic
13	29732600	29733000	Peak_22	292.026	.	Cdkal1	ENSMUSG00000006191	protein_coding	intronic
1	139012600	139012800	Peak_23	288.771	.	Dennd1b	ENSMUSG00000056268	protein_coding	intronic
13	12098800	12102800	Peak_24	278.239	.	Ryr2	ENSMUSG00000021313	protein_coding	intronic
8	61817400	61819200	Peak_25	277.015	.	Palld	ENSMUSG00000058056	protein_coding	intronic
2	49094800	49095200	Peak_26	274.382	.	Mbd5	ENSMUSG00000036792	protein_coding	intronic
8	73045000	73045400	Peak_27	271.36	.	Large1	ENSMUSG00000004383	protein_coding	exonic
10	3375400	3378800	Peak_28	267.353	.	Ppp1r14c	ENSMUSG00000040653	protein_coding	intronic
16	45797400	45798600	Peak_29	266.593	.	Phldb2	ENSMUSG00000033149	protein_coding	intronic
2	14713000	14716000	Peak_30	262.117	.	Cacnb2,Gm10848	ENSMUSG00000057914,ENSMUSG00000104106	protein_coding,antisense	intronic
4	9553600	9554000	Peak_31	258.254	.	Asph	ENSMUSG00000028207	protein_coding	intronic
2	34474600	34475000	Peak_32	256.648	.	Mapkap1	ENSMUSG00000038696	protein_coding	intronic
11	88351200	88351800	Peak_33	250.046	.	Msi2	ENSMUSG00000069769	protein_coding	intronic
17	78722600	78723000	Peak_34	245.778	.	Strn	ENSMUSG00000024077	protein_coding	intronic
3	127277400	127277800	Peak_35	242.478	.	Ank2	ENSMUSG00000032826	protein_coding	intronic
11	22070200	22071800	Peak_36	236.537	.	Ehbp1	ENSMUSG00000042302	protein_coding	intronic
12	87154800	87155000	Peak_37	235.084	.	Gstz1	ENSMUSG00000021033	protein_coding	intronic
4	100149200	100149600	Peak_38	234.727	.	Ror1	ENSMUSG00000035305	protein_coding	intronic
7	44480600	44481400	Peak_39	229.13	.	Charme	CUFF405	lincRNA	exonic
1	60262400	60262800	Peak_40	228.011	.	Nbeal1	ENSMUSG00000073664	protein_coding	intronic
2	135904000	135904400	Peak_41	226.41	.	Plcb4	ENSMUSG00000039943	protein_coding	intronic
5	17876200	17876400	Peak_42	223.284	.	Cd36	ENSMUSG00000002944	protein_coding	intronic
12	69972000	69973000	Peak_43	222.345	.	Sav1	ENSMUSG00000021067	protein_coding	intronic
1	69091200	69091600	Peak_44	221.847	.	Erbb4	ENSMUSG00000062209	protein_coding	intronic
2	14700200	14702800	Peak_45	219.615	.	Cacnb2	ENSMUSG00000057914	protein_coding	intronic
18	49928600	49929000	Peak_46	213.731	.	Dmxl1	ENSMUSG00000037416	protein_coding	intronic
15	3984400	3985800	Peak_47	212.804	.	AW549877	ENSMUSG00000041935	protein_coding	three_prime_utr
6	108857200	108857400	Peak_48	211.876	.	Edem1	ENSMUSG00000030104	protein_coding	three_prime_utr
13	104404800	104405000	Peak_49	211.728	.	Adamts6	ENSMUSG00000046169	protein_coding	intronic
6	119194600	119195800	Peak_50	208.449	.	Dcp1b,Cacna1c	ENSMUSG00000041477,ENSMUSG00000051331	protein_coding	intronic
8	86668400	86668800	Peak_51	207.716	.	Lonp2	ENSMUSG00000047866	protein_coding	intronic
15	96314200	96314600	Peak_52	205.916	.	Arid2	ENSMUSG00000033237	protein_coding	intronic
11	106900000	106900600	Peak_53	205.425	.	Smurf2	ENSMUSG00000018363	protein_coding	intronic
11	54462800	54463600	Peak_54	204.3	.	Fnip1	ENSMUSG00000035992	protein_coding	intronic
5	57986800	57989200	Peak_55	203.392	.	Pcdh7	ENSMUSG00000029108	protein_coding	intronic
10	63886800	63889400	Peak_56	202.928	.	Ctnna3	ENSMUSG00000060843	protein_coding	intronic
18	31912000	31912200	Peak_57	201.018	.	intergenic	intergenic	intergenic	intergenic
14	70182200	70182600	Peak_58	199.295	.	Sorbs3	ENSMUSG00000022091	protein_coding	intronic
3	142298000	142300800	Peak_59	199.236	.	Pdlim5	ENSMUSG00000028273	protein_coding	intronic
3	59204400	59204800	Peak_60	197.892	.	Med12l	ENSMUSG00000056476	protein_coding	intronic
1	43128800	43130000	Peak_61	197.272	.	Fhl2	ENSMUSG00000008136	protein_coding	intronic
3	56116800	56117200	Peak_62	197.051	.	Nbea	ENSMUSG00000027799	protein_coding	intronic
3	144537000	144537400	Peak_63	195.693	.	Hs2st1	ENSMUSG00000040151	protein_coding	intronic
8	33905000	33907200	Peak_64	192.268	.	Rbpms	ENSMUSG00000031586	protein_coding	intronic
X	100756200	100756600	Peak_65	192.226	.	intergenic	intergenic	intergenic	intergenic
8	61630600	61632000	Peak_66	191.98	.	Palld	ENSMUSG00000058056	protein_coding	intronic
18	23810000	23810400	Peak_67	191.831	.	Mapre2	ENSMUSG00000024277	protein_coding	intronic
X	52466800	52467000	Peak_68	191.7	.	Gpc3	ENSMUSG00000055653	protein_coding	intronic
X	59395000	59396200	Peak_69	191.524	.	Fgf13	ENSMUSG00000031137	protein_coding	intronic
4	46091000	46092200	Peak_70	191.266	.	Tmod1	ENSMUSG00000028328	protein_coding	intronic
3	127275800	127276200	Peak_71	190.662	.	Ank2	ENSMUSG00000032826	protein_coding	intronic
4	57666200	57667000	Peak_72	190.154	.	Palm2,Pakap	ENSMUSG00000090053,ENSMUSG00000089945	protein_coding	intronic
2	181283400	181283800	Peak_73	190.142	.	Gmeb2	ENSMUSG00000038705	protein_coding	intronic
14	76425200	76425600	Peak_74	189.059	.	Tsc22d1	ENSMUSG00000022010	protein_coding	intronic
1	92010000	92010400	Peak_75	185.697	.	Hdac4	ENSMUSG00000026313	protein_coding	intronic
19	16318200	16318400	Peak_76	184.83	.	Gnaq	ENSMUSG00000024639	protein_coding	intronic
X	59536400	59539000	Peak_77	184.077	.	Fgf13	ENSMUSG00000031137	protein_coding	intronic
8	128473000	128473400	Peak_78	183.318	.	Nrp1	ENSMUSG00000025810	protein_coding	intronic
12	3480000	3480200	Peak_79	182.384	.	Asxl2	ENSMUSG00000037486	protein_coding	intronic
18	43435000	43435400	Peak_80	181.692	.	Dpysl3	ENSMUSG00000024501	protein_coding	intronic
8	45699800	45701800	Peak_81	181.469	.	Sorbs2	ENSMUSG00000031626	protein_coding	intronic
14	21325600	21326000	Peak_82	181.095	.	Adk	ENSMUSG00000039197	protein_coding	intronic
10	68172600	68173000	Peak_83	179.69	.	Arid5b	ENSMUSG00000019947	protein_coding	intronic
7	112249000	112249400	Peak_84	179.333	.	Mical2	ENSMUSG00000038244	protein_coding	intronic
15	53265600	53267400	Peak_85	177.922	.	Ext1	ENSMUSG00000061731	protein_coding	intronic
1	168397000	168399200	Peak_86	176.357	.	Pbx1	ENSMUSG00000052534	protein_coding	intronic
11	22068800	22070000	Peak_87	174.552	.	Ehbp1	ENSMUSG00000042302	protein_coding	intronic
13	113850000	113850400	Peak_88	172.876	.	Arl15	ENSMUSG00000042348	protein_coding	intronic
17	43877800	43879000	Peak_89	168.591	.	Rcan2	ENSMUSG00000039601	protein_coding	intronic
6	118665000	118666600	Peak_90	168.156	.	Cacna1c	ENSMUSG00000051331	protein_coding	intronic
2	14926800	14929200	Peak_91	167.657	.	Cacnb2	ENSMUSG00000057914	protein_coding	intronic
14	25634400	25634800	Peak_92	166.435	.	Zmiz1	ENSMUSG00000007817	protein_coding	intronic
15	55735600	55736000	Peak_93	165.987	.	Sntb1	ENSMUSG00000060429	protein_coding	intronic
9	24744000	24746600	Peak_94	165.876	.	Tbx20	ENSMUSG00000031965	protein_coding	intronic
18	24736600	24737000	Peak_95	164.22	.	Fhod3	ENSMUSG00000034295	protein_coding	intronic
10	33086000	33086400	Peak_96	164.085	.	Trdn	ENSMUSG00000019787	protein_coding	intronic
1	21888400	21888800	Peak_97	163.786	.	Kcnq5	ENSMUSG00000028033	protein_coding	intronic
4	105018000	105018400	Peak_98	163.397	.	intergenic	intergenic	intergenic	intergenic
10	17822400	17822800	Peak_99	162.208	.	Txlnb	ENSMUSG00000039891	protein_coding	intronic
17	66938400	66938800	Peak_100	161.79	.	Ptprm	ENSMUSG00000033278	protein_coding	intronic
8	128374800	128377000	Peak_101	161.663	.	Nrp1	ENSMUSG00000025810	protein_coding	intronic
2	14924200	14925600	Peak_102	161.503	.	Cacnb2	ENSMUSG00000057914	protein_coding	intronic
7	17031400	17033400	Peak_103	161.149	.	Hif3a	ENSMUSG00000004328	protein_coding	three_prime_utr
10	3404800	3405600	Peak_104	161.128	.	Ppp1r14c	ENSMUSG00000040653	protein_coding	intronic
5	57751800	57752200	Peak_105	160.643	.	Pcdh7	ENSMUSG00000029108	protein_coding	intronic
15	72619600	72620000	Peak_106	159.797	.	Trappc9	ENSMUSG00000047921	protein_coding	intronic
15	55785600	55786000	Peak_107	158.602	.	Sntb1	ENSMUSG00000060429	protein_coding	intronic
12	82430600	82431000	Peak_108	158.261	.	Sipa1l1	ENSMUSG00000042700	protein_coding	intronic
12	109581000	109582400	Peak_109	158.243	.	intergenic	intergenic	intergenic	intergenic
6	85945200	85947200	Peak_110	158.187	.	Dusp11	ENSMUSG00000030002	protein_coding	three_prime_utr
13	78018000	78018400	Peak_111	157.492	.	Fam172a	ENSMUSG00000064138	protein_coding	intronic
3	126696800	126698600	Peak_112	157.343	.	Camk2d	ENSMUSG00000053819	protein_coding	intronic
1	21772600	21772800	Peak_113	156.56	.	Kcnq5	ENSMUSG00000028033	protein_coding	intronic
3	121803200	121803800	Peak_114	156.478	.	Abcd3	ENSMUSG00000028127	protein_coding	intronic
1	160715800	160716000	Peak_115	155.283	.	Rabgap1l	ENSMUSG00000026721	protein_coding	intronic
2	74518200	74518600	Peak_116	154.465	.	intergenic	intergenic	intergenic	intergenic
8	61637000	61639800	Peak_117	153.492	.	Palld	ENSMUSG00000058056	protein_coding	intronic
2	68251800	68252000	Peak_118	152.485	.	Stk39	ENSMUSG00000027030	protein_coding	intronic
X	141586000	141586400	Peak_119	152.462	.	Col4a5	ENSMUSG00000031274	protein_coding	intronic
3	69124400	69125000	Peak_120	152.412	.	Kpna4	ENSMUSG00000027782	protein_coding	intronic
15	40719200	40719600	Peak_121	152.277	.	Zfpm2	ENSMUSG00000022306	protein_coding	intronic
1	168373600	168374200	Peak_122	151.224	.	Pbx1	ENSMUSG00000052534	protein_coding	intronic
3	131640400	131640600	Peak_123	150.166	.	Papss1	ENSMUSG00000028032	protein_coding	intronic
1	134954600	134955000	Peak_124	149.822	.	Ppp1r12b	ENSMUSG00000073557	protein_coding	intronic
16	5858800	5859400	Peak_125	149.726	.	intergenic	intergenic	intergenic	intergenic
15	69069600	69069800	Peak_126	148.967	.	Khdrbs3	ENSMUSG00000022332	protein_coding	intronic
6	28689800	28690200	Peak_127	146.496	.	Snd1,Lrrc4	ENSMUSG00000001424,ENSMUSG00000049939	protein_coding	intronic
2	103613800	103614600	Peak_128	146.391	.	Abtb2	ENSMUSG00000032724	protein_coding	intronic
10	63632600	63633400	Peak_129	146.145	.	Ctnna3	ENSMUSG00000060843	protein_coding	intronic
1	69100000	69100800	Peak_130	146.128	.	Erbb4,Gm16076	ENSMUSG00000062209,ENSMUSG00000087514	protein_coding,sense_intronic	intronic
1	55472400	55472600	Peak_131	145.958	.	Plcl1	ENSMUSG00000038349	protein_coding	intronic
13	108943000	108943800	Peak_132	145.316	.	Pde4d	ENSMUSG00000021699	protein_coding	intronic
18	24845200	24847000	Peak_133	145.279	.	Fhod3	ENSMUSG00000034295	protein_coding	intronic
7	44476400	44476800	Peak_134	145.165	.	Charme	CUFF405	lincRNA	exonic
10	64683800	64684200	Peak_135	145.135	.	Ctnna3	ENSMUSG00000060843	protein_coding	intronic
18	25035800	25036200	Peak_136	144.975	.	Fhod3	ENSMUSG00000034295	protein_coding	intronic
12	73146800	73147000	Peak_137	144.633	.	Mnat1	ENSMUSG00000021103	protein_coding	intronic
13	49713200	49713400	Peak_138	144.19	.	Iars	ENSMUSG00000037851	protein_coding	intronic
2	59173400	59173800	Peak_139	144.027	.	Pkp4	ENSMUSG00000026991	protein_coding	intronic
1	104774600	104775000	Peak_140	142.98	.	Cdh20	ENSMUSG00000050840	protein_coding	intronic
2	105998600	105999000	Peak_141	142.98	.	Dnajc24	ENSMUSG00000027166	protein_coding	intronic
2	107318000	107318800	Peak_142	142.975	.	intergenic	intergenic	intergenic	intergenic
2	172870800	172871200	Peak_143	142.874	.	Bmp7	ENSMUSG00000008999	protein_coding	intronic
7	16539800	16540200	Peak_144	142.228	.	Arhgap35	ENSMUSG00000058230	protein_coding	intronic
10	64091800	64092200	Peak_145	142.095	.	Ctnna3	ENSMUSG00000060843	protein_coding	intronic
4	53834000	53834400	Peak_146	141.973	.	Tmem38b	ENSMUSG00000028420	protein_coding	intronic
7	67366800	67368200	Peak_147	141.543	.	Mef2a,Gm44668	ENSMUSG00000030557,ENSMUSG00000109363	protein_coding,TEC	intronic,exonic
17	40951000	40951200	Peak_148	141.22	.	Mut	ENSMUSG00000023921	protein_coding	intronic
1	150970200	150971600	Peak_149	139.564	.	Hmcn1	ENSMUSG00000066842	protein_coding	intronic
14	63267200	63268400	Peak_150	138.761	.	Gata4	ENSMUSG00000021944	protein_coding	intronic
8	45678800	45680000	Peak_151	137.952	.	Sorbs2	ENSMUSG00000031626	protein_coding	intronic
2	24835000	24835800	Peak_152	137.573	.	Ehmt1	ENSMUSG00000036893	protein_coding	exonic
13	76197600	76197800	Peak_153	137.158	.	intergenic	intergenic	intergenic	intergenic
17	67048200	67048600	Peak_154	135.965	.	Ptprm	ENSMUSG00000033278	protein_coding	intronic
13	11986600	11988800	Peak_155	135.341	.	Ryr2	ENSMUSG00000021313	protein_coding	intronic
X	169107400	169108000	Peak_156	135.279	.	Arhgap6	ENSMUSG00000031355	protein_coding	intronic
10	64001200	64002800	Peak_157	134.951	.	Ctnna3,Lrrtm3	ENSMUSG00000060843,ENSMUSG00000042846	protein_coding	intronic
4	121208400	121208600	Peak_158	134.122	.	Rlf	ENSMUSG00000049878	protein_coding	intronic
18	21191800	21192000	Peak_159	133.903	.	Garem1	ENSMUSG00000042680	protein_coding	intronic
19	40479400	40479800	Peak_160	133.843	.	intergenic	intergenic	intergenic	intergenic
18	12956000	12957400	Peak_161	133.377	.	intergenic	intergenic	intergenic	intergenic
10	64344200	64344800	Peak_162	132.679	.	Ctnna3	ENSMUSG00000060843	protein_coding	intronic
8	127437000	127437400	Peak_163	131.839	.	Pard3	ENSMUSG00000025812	protein_coding	intronic
1	57355200	57355600	Peak_164	130.694	.	intergenic	intergenic	intergenic	intergenic
17	23185600	23186000	Peak_165	130.51	.	Zfp40	ENSMUSG00000002617	protein_coding	intronic
13	11964200	11966400	Peak_166	130.28	.	Ryr2	ENSMUSG00000021313	protein_coding	intronic
10	30584200	30584400	Peak_167	129.057	.	Trmt11	ENSMUSG00000019792	protein_coding	intronic
8	61751600	61754600	Peak_168	128.935	.	Palld	ENSMUSG00000058056	protein_coding	intronic
18	16739400	16739800	Peak_169	128.773	.	Cdh2	ENSMUSG00000024304	protein_coding	intronic
9	49717000	49718800	Peak_170	127.612	.	Ncam1	ENSMUSG00000039542	protein_coding	intronic
1	152622600	152623000	Peak_171	127.026	.	Rgl1	ENSMUSG00000026482	protein_coding	intronic
16	24794000	24794400	Peak_172	126.996	.	Lpp	ENSMUSG00000033306	protein_coding	intronic
16	43629400	43630600	Peak_173	126.557	.	Zbtb20	ENSMUSG00000022708	protein_coding	three_prime_utr
10	109999200	109999600	Peak_174	126.365	.	Nav3	ENSMUSG00000020181	protein_coding	intronic
12	4441200	4441400	Peak_175	126.332	.	Ncoa1	ENSMUSG00000020647	protein_coding	intronic
17	63203000	63203200	Peak_176	125.956	.	Fbxl17	ENSMUSG00000023965	protein_coding	intronic
10	63935000	63936200	Peak_177	125.941	.	Ctnna3,Lrrtm3	ENSMUSG00000060843,ENSMUSG00000042846	protein_coding	intronic
16	5498000	5498200	Peak_178	125.771	.	intergenic	intergenic	intergenic	intergenic
10	3456800	3458800	Peak_179	125.375	.	Ppp1r14c	ENSMUSG00000040653	protein_coding	intronic
12	40531600	40531800	Peak_180	125.294	.	Dock4	ENSMUSG00000035954	protein_coding	intronic
17	27778200	27778600	Peak_181	125.006	.	D17Wsu92e	ENSMUSG00000056692	protein_coding	intronic
1	43174800	43176000	Peak_182	124.676	.	Fhl2	ENSMUSG00000008136	protein_coding	intronic
10	83632400	83632600	Peak_183	123.724	.	Appl2	ENSMUSG00000020263	protein_coding	intronic
14	76426400	76426800	Peak_184	123.131	.	Tsc22d1	ENSMUSG00000022010	protein_coding	intronic
12	4436800	4437000	Peak_185	122.667	.	Ncoa1	ENSMUSG00000020647	protein_coding	intronic
7	16599800	16600000	Peak_186	122.177	.	Arhgap35	ENSMUSG00000058230	protein_coding	intronic
10	13117800	13118600	Peak_187	121.896	.	Plagl1	ENSMUSG00000019817	protein_coding	intronic
13	11900000	11903200	Peak_188	121.88	.	Ryr2	ENSMUSG00000021313	protein_coding	intronic
19	40669800	40670200	Peak_189	121.808	.	Entpd1	ENSMUSG00000048120	protein_coding	intronic
5	57787600	57789200	Peak_190	121.806	.	Pcdh7	ENSMUSG00000029108	protein_coding	intronic
4	94486000	94486400	Peak_191	121.378	.	intergenic	intergenic	intergenic	intergenic
2	84600400	84602600	Peak_192	121.196	.	Ctnnd1,Gm28635	ENSMUSG00000034101,ENSMUSG00000101645	protein_coding	three_prime_utr
18	44607800	44609000	Peak_193	120.806	.	Mcc	ENSMUSG00000071856	protein_coding	intronic
3	104147400	104147800	Peak_194	120.69	.	Magi3	ENSMUSG00000052539	protein_coding	intronic
2	14748600	14751400	Peak_195	120.5	.	Cacnb2,Gm13269	ENSMUSG00000057914,ENSMUSG00000087086	protein_coding,antisense	intronic
10	64118400	64119600	Peak_196	120.418	.	Ctnna3	ENSMUSG00000060843	protein_coding	intronic
2	14972200	14973000	Peak_197	120.282	.	Cacnb2	ENSMUSG00000057914	protein_coding	intronic
4	58860200	58860400	Peak_198	120.226	.	AI314180	ENSMUSG00000050812	protein_coding	intronic
8	61661000	61663200	Peak_199	119.22	.	Palld	ENSMUSG00000058056	protein_coding	intronic
16	43484400	43484800	Peak_200	118.718	.	Zbtb20	ENSMUSG00000022708	protein_coding	intronic
18	54951600	54951800	Peak_201	118.431	.	Zfp608	ENSMUSG00000052713	protein_coding	intronic
10	13307400	13307800	Peak_202	118.284	.	Phactr2	ENSMUSG00000062866	protein_coding	intronic
3	126711400	126711800	Peak_203	118.061	.	Camk2d	ENSMUSG00000053819	protein_coding	intronic
18	6057600	6057800	Peak_204	117.564	.	Arhgap12	ENSMUSG00000041225	protein_coding	intronic
13	62031800	62032000	Peak_205	117.388	.	intergenic	intergenic	intergenic	intergenic
18	54957200	54957600	Peak_206	116.439	.	Zfp608	ENSMUSG00000052713	protein_coding	intronic
18	13923200	13923600	Peak_207	115.993	.	Zfp521	ENSMUSG00000024420	protein_coding	intronic
1	183189200	183189400	Peak_208	115.811	.	Disp1	ENSMUSG00000030768	protein_coding	intronic
10	39665800	39666000	Peak_209	115.793	.	E130307A14Rik	ENSMUSG00000087177	antisense	intronic
X	59492000	59492800	Peak_210	115.694	.	Fgf13	ENSMUSG00000031137	protein_coding	intronic
15	55870600	55871000	Peak_211	115.639	.	Sntb1	ENSMUSG00000060429	protein_coding	intronic
11	113089600	113089800	Peak_212	115.581	.	2610035D17Rik	ENSMUSG00000087259	lincRNA	intronic
19	53828400	53828800	Peak_213	115.121	.	Rbm20	ENSMUSG00000043639	protein_coding	intronic
12	78234400	78234600	Peak_214	114.918	.	Gphn	ENSMUSG00000047454	protein_coding	intronic
2	106706600	106706800	Peak_215	114.045	.	Mpped2	ENSMUSG00000016386	protein_coding	intronic
16	5623800	5624200	Peak_216	113.809	.	intergenic	intergenic	intergenic	intergenic
13	75884200	75884400	Peak_217	113.591	.	Rhobtb3	ENSMUSG00000021589	protein_coding	intronic
10	111239400	111240400	Peak_218	113.349	.	Osbpl8	ENSMUSG00000020189	protein_coding	intronic
11	11971600	11972400	Peak_219	113.3	.	Grb10	ENSMUSG00000020176	protein_coding	intronic
1	153315800	153316000	Peak_220	113.135	.	Lamc1	ENSMUSG00000026478	protein_coding	intronic
5	112704200	112706200	Peak_221	113.006	.	Myo18b	ENSMUSG00000072720	protein_coding	intronic
X	69567000	69567400	Peak_222	113.004	.	Aff2	ENSMUSG00000031189	protein_coding	intronic
13	53174400	53174800	Peak_223	112.909	.	Ror2	ENSMUSG00000021464	protein_coding	intronic
10	3439000	3440400	Peak_224	112.791	.	Ppp1r14c	ENSMUSG00000040653	protein_coding	intronic
10	120837400	120838000	Peak_225	112.694	.	Msrb3	ENSMUSG00000051236	protein_coding	intronic
4	46074000	46074400	Peak_226	112.547	.	Tmod1	ENSMUSG00000028328	protein_coding	intronic
17	62630200	62630400	Peak_227	111.812	.	Efna5	ENSMUSG00000048915	protein_coding	intronic
10	3432600	3434400	Peak_228	111.193	.	Ppp1r14c	ENSMUSG00000040653	protein_coding	intronic
11	43698200	43698400	Peak_229	111.162	.	Pwwp2a	ENSMUSG00000044950	protein_coding	intronic
8	61676000	61676400	Peak_230	110.901	.	Palld	ENSMUSG00000058056	protein_coding	intronic
7	111736600	111736800	Peak_231	110.246	.	Galnt18	ENSMUSG00000038296	protein_coding	intronic
16	91494200	91494400	Peak_232	110.064	.	Ifnar1	ENSMUSG00000022967	protein_coding	intronic
18	11048000	11048200	Peak_233	109.252	.	intergenic	intergenic	intergenic	intergenic
17	43863000	43864000	Peak_234	108.954	.	Rcan2	ENSMUSG00000039601	protein_coding	intronic
16	16220600	16220800	Peak_235	108.91	.	Pkp2	ENSMUSG00000041957	protein_coding	intronic
2	77021600	77022400	Peak_236	108.876	.	Ccdc141	ENSMUSG00000044033	protein_coding	intronic
19	60564800	60565000	Peak_237	108.503	.	Cacul1	ENSMUSG00000033417	protein_coding	intronic
2	64997600	64997800	Peak_238	108.38	.	Grb14	ENSMUSG00000026888	protein_coding	intronic
19	59323000	59323200	Peak_239	108.248	.	Pdzd8	ENSMUSG00000074746	protein_coding	intronic
16	11819200	11819400	Peak_240	108.072	.	Cpped1	ENSMUSG00000065979	protein_coding	intronic
6	118717200	118717800	Peak_241	108.036	.	Cacna1c	ENSMUSG00000051331	protein_coding	intronic
11	77266200	77266600	Peak_242	107.045	.	Ssh2	ENSMUSG00000037926	protein_coding	intronic
10	95518600	95519000	Peak_243	106.806	.	Ube2n	ENSMUSG00000074781	protein_coding	intronic
11	89992400	89992600	Peak_244	106.739	.	Pctp	ENSMUSG00000020553	protein_coding	intronic
18	38895800	38896000	Peak_245	106.243	.	Fgf1,Arhgap26	ENSMUSG00000036585,ENSMUSG00000036452	protein_coding	intronic
7	18847400	18847800	Peak_246	106.189	.	Mill2	ENSMUSG00000040987	protein_coding	intronic
6	32813400	32814400	Peak_247	106.128	.	Chchd3	ENSMUSG00000053768	protein_coding	intronic
8	107172000	107172400	Peak_248	105.909	.	Cyb5b	ENSMUSG00000031924	protein_coding	intronic
2	49033400	49034000	Peak_249	105.804	.	Mbd5	ENSMUSG00000036792	protein_coding	intronic
15	96365200	96365600	Peak_250	105.629	.	Arid2	ENSMUSG00000033237	protein_coding	intronic
10	63636000	63638200	Peak_251	105.294	.	Ctnna3	ENSMUSG00000060843	protein_coding	intronic
3	7412400	7412800	Peak_252	105.278	.	Pkia	ENSMUSG00000027499	protein_coding	intronic
2	180390200	180391800	Peak_253	104.998	.	intergenic	intergenic	intergenic	intergenic
2	155884800	155885200	Peak_254	103.96	.	Uqcc1	ENSMUSG00000005882	protein_coding	intronic
11	95835800	95836000	Peak_255	103.956	.	Abi3	ENSMUSG00000018381	protein_coding	CDS
1	127427000	127427200	Peak_256	103.702	.	Mgat5	ENSMUSG00000036155	protein_coding	intronic
11	65216600	65217000	Peak_257	103.688	.	Myocd	ENSMUSG00000020542	protein_coding	intronic
4	114505800	114506000	Peak_258	103.636	.	Trabd2b	ENSMUSG00000070867	protein_coding	intronic
13	12097600	12098600	Peak_259	103.605	.	Ryr2	ENSMUSG00000021313	protein_coding	intronic
5	132469400	132469800	Peak_260	102.893	.	Auts2	ENSMUSG00000029673	protein_coding	intronic
19	31446600	31447400	Peak_261	102.362	.	Prkg1	ENSMUSG00000052920	protein_coding	intronic
4	94822200	94822400	Peak_262	101.812	.	Tek	ENSMUSG00000006386	protein_coding	intronic
2	157304600	157304800	Peak_263	101.641	.	Rpn2	ENSMUSG00000027642	protein_coding	intronic
13	91608600	91608800	Peak_264	101.597	.	Ssbp2	ENSMUSG00000003992	protein_coding	intronic
19	27781000	27781400	Peak_265	101.419	.	Rfx3	ENSMUSG00000040929	protein_coding	intronic
11	85565600	85565800	Peak_266	101.419	.	Bcas3	ENSMUSG00000059439	protein_coding	intronic
4	75989000	75989200	Peak_267	101.189	.	Ptprd	ENSMUSG00000028399	protein_coding	intronic
5	112711600	112712000	Peak_268	100.865	.	Myo18b	ENSMUSG00000072720	protein_coding	intronic
10	18084400	18084600	Peak_269	100.482	.	Reps1	ENSMUSG00000019854	protein_coding	intronic
15	77275200	77276000	Peak_270	100.47	.	Rbfox2	ENSMUSG00000033565	protein_coding	intronic
3	30442000	30442200	Peak_271	100.318	.	Mecom	ENSMUSG00000027684	protein_coding	intronic
15	66964600	66965000	Peak_272	100.255	.	Ndrg1	ENSMUSG00000005125	protein_coding	intronic
7	143214800	143215800	Peak_273	99.8712	.	Kcnq1,Kcnq1ot1	ENSMUSG00000009545,ENSMUSG00000101609	protein_coding,antisense	intronic,exonic
17	23183000	23183200	Peak_274	99.8705	.	Zfp40	ENSMUSG00000002617	protein_coding	intronic
16	31712200	31712600	Peak_275	99.8686	.	Dlg1	ENSMUSG00000022770	protein_coding	intronic
17	30119200	30119400	Peak_276	99.8455	.	Zfand3	ENSMUSG00000044477	protein_coding	intronic
5	31176400	31179000	Peak_277	99.7263	.	Gm29609,Gtf3c2	ENSMUSG00000101678,ENSMUSG00000106864	protein_coding	intronic
10	40137600	40137800	Peak_278	99.1229	.	Slc16a10	ENSMUSG00000019838	protein_coding	intronic
6	58909800	58910200	Peak_279	98.7565	.	Herc3	ENSMUSG00000029804	protein_coding	intronic
10	98976400	98977200	Peak_280	98.6772	.	Atp2b1	ENSMUSG00000019943	protein_coding	intronic
8	13238200	13239000	Peak_281	98.6517	.	Adprhl1	ENSMUSG00000031448	protein_coding	intronic
8	36758200	36760600	Peak_282	98.5793	.	Dlc1	ENSMUSG00000031523	protein_coding	intronic
13	11962800	11964000	Peak_283	98.3984	.	Ryr2	ENSMUSG00000021313	protein_coding	intronic
16	16450600	16451000	Peak_284	98.0289	.	Fgd4	ENSMUSG00000022788	protein_coding	intronic
11	5394000	5394200	Peak_285	97.4287	.	Znrf3	ENSMUSG00000041961	protein_coding	intronic
2	107363200	107363400	Peak_286	97.4033	.	intergenic	intergenic	intergenic	intergenic
13	94378400	94378600	Peak_287	96.996	.	Ap3b1	ENSMUSG00000021686	protein_coding	intronic
8	36716400	36717800	Peak_288	96.8644	.	Dlc1	ENSMUSG00000031523	protein_coding	intronic
3	96744400	96744800	Peak_289	96.6291	.	Rnf115	ENSMUSG00000028098	protein_coding	intronic
1	53884000	53884400	Peak_290	96.1256	.	Hecw2	ENSMUSG00000042807	protein_coding	intronic
10	43138600	43139000	Peak_291	95.8336	.	Sobp	ENSMUSG00000038248	protein_coding	intronic
18	13932600	13933600	Peak_292	95.6761	.	Zfp521	ENSMUSG00000024420	protein_coding	intronic
19	53825600	53827400	Peak_293	95.6732	.	Rbm20	ENSMUSG00000043639	protein_coding	intronic
2	6862400	6863200	Peak_294	95.2248	.	Celf2	ENSMUSG00000002107	protein_coding	intronic
14	21605600	21605800	Peak_295	94.6795	.	Kat6b	ENSMUSG00000021767	protein_coding	intronic
2	105766600	105766800	Peak_296	94.6795	.	Elp4	ENSMUSG00000027167	protein_coding	intronic
10	63649000	63650400	Peak_297	94.5693	.	Ctnna3	ENSMUSG00000060843	protein_coding	intronic
3	73670400	73670600	Peak_298	94.5129	.	Bche	ENSMUSG00000027792	protein_coding	intronic
13	48882800	48883000	Peak_299	94.3702	.	Fam120a	ENSMUSG00000038014	protein_coding	intronic
13	29970800	29971000	Peak_300	93.4156	.	E2f3	ENSMUSG00000016477	protein_coding	intronic
13	12732600	12732800	Peak_301	93.1805	.	intergenic	intergenic	intergenic	intergenic
13	12012000	12012800	Peak_302	92.8487	.	Ryr2	ENSMUSG00000021313	protein_coding	intronic
16	78306000	78306200	Peak_303	92.7732	.	Cxadr	ENSMUSG00000022865	protein_coding	intronic
15	80580600	80580800	Peak_304	92.7575	.	intergenic	intergenic	intergenic	intergenic
18	39012600	39012800	Peak_305	92.7492	.	Arhgap26	ENSMUSG00000036452	protein_coding	intronic
15	67150400	67150600	Peak_306	92.5146	.	intergenic	intergenic	intergenic	intergenic
1	97911600	97911800	Peak_307	92.111	.	Pam	ENSMUSG00000026335	protein_coding	intronic
X	142708600	142709000	Peak_308	91.9415	.	Tmem164	ENSMUSG00000047045	protein_coding	intronic
3	126710400	126711000	Peak_309	91.8771	.	Camk2d	ENSMUSG00000053819	protein_coding	intronic
19	40372400	40373000	Peak_310	91.8689	.	Sorbs1	ENSMUSG00000025006	protein_coding	intronic
15	3497200	3498400	Peak_311	91.351	.	Ghr	ENSMUSG00000055737	protein_coding	intronic
X	59429000	59429200	Peak_312	91.2814	.	Fgf13	ENSMUSG00000031137	protein_coding	intronic
15	59006800	59007000	Peak_313	91.2158	.	Mtss1	ENSMUSG00000022353	protein_coding	intronic
16	70437400	70437600	Peak_314	91.0637	.	Gbe1	ENSMUSG00000022707	protein_coding	intronic
X	59441600	59443200	Peak_315	90.8265	.	Fgf13	ENSMUSG00000031137	protein_coding	intronic
17	86762600	86762800	Peak_316	90.7812	.	Epas1	ENSMUSG00000024140	protein_coding	intronic
5	131657800	131658000	Peak_317	90.6187	.	Auts2	ENSMUSG00000029673	protein_coding	intronic
13	9160000	9160200	Peak_318	90.4009	.	Larp4b	ENSMUSG00000033499	protein_coding	intronic
10	45352400	45353200	Peak_319	90.2217	.	Bves	ENSMUSG00000071317	protein_coding	intronic
13	116888400	116888800	Peak_320	90.1616	.	Parp8	ENSMUSG00000021725	protein_coding	intronic
1	135682800	135683000	Peak_321	90.1236	.	Gm38399	ENSMUSG00000090399	lincRNA	intronic
13	9441200	9441600	Peak_322	89.9609	.	Dip2c	ENSMUSG00000048264	protein_coding	intronic
12	99287600	99287800	Peak_323	89.6761	.	Foxn3	ENSMUSG00000033713	protein_coding	intronic
13	109695400	109695800	Peak_324	89.6445	.	Pde4d	ENSMUSG00000021699	protein_coding	intronic
19	60938200	60938400	Peak_325	89.5576	.	Grk5	ENSMUSG00000003228	protein_coding	intronic
1	168210600	168210800	Peak_326	89.5003	.	Pbx1	ENSMUSG00000052534	protein_coding	intronic
1	177061800	177062000	Peak_327	89.452	.	Akt3	ENSMUSG00000019699	protein_coding	intronic
4	97887400	97887600	Peak_328	89.452	.	Nfia	ENSMUSG00000028565	protein_coding	intronic
X	60324600	60324800	Peak_329	89.452	.	Atp11c	ENSMUSG00000062949	protein_coding	intronic
12	100367800	100368000	Peak_330	89.0778	.	Ttc7b	ENSMUSG00000033530	protein_coding	intronic
10	64730800	64731000	Peak_331	89.0401	.	Ctnna3	ENSMUSG00000060843	protein_coding	intronic
11	22165200	22166400	Peak_332	88.9349	.	Ehbp1	ENSMUSG00000042302	protein_coding	intronic
14	34489400	34490000	Peak_333	88.9153	.	Bmpr1a	ENSMUSG00000021796	protein_coding	intronic
10	68246600	68246800	Peak_334	88.8377	.	Arid5b	ENSMUSG00000019947	protein_coding	intronic
10	34014400	34014600	Peak_335	88.1371	.	Rwdd1	ENSMUSG00000019782	protein_coding	intronic
10	71055800	71056000	Peak_336	88.1203	.	Bicc1	ENSMUSG00000014329	protein_coding	intronic
8	79065000	79065200	Peak_337	87.9576	.	Zfp827	ENSMUSG00000071064	protein_coding	intronic
5	16334800	16335800	Peak_338	87.476	.	Cacna2d1	ENSMUSG00000040118	protein_coding	intronic
X	59313400	59314000	Peak_339	87.2891	.	Fgf13	ENSMUSG00000031137	protein_coding	intronic
14	11756000	11756200	Peak_340	87.2674	.	Ptprg	ENSMUSG00000021745	protein_coding	intronic
16	5506400	5506800	Peak_341	87.254	.	intergenic	intergenic	intergenic	intergenic
13	9303800	9304600	Peak_342	87.0539	.	Dip2c	ENSMUSG00000048264	protein_coding	intronic
5	51534800	51535400	Peak_343	86.8672	.	Ppargc1a	ENSMUSG00000029167	protein_coding	intronic
13	91625600	91625800	Peak_344	86.8155	.	Ssbp2	ENSMUSG00000003992	protein_coding	intronic
14	19952800	19953200	Peak_345	86.7663	.	Gng2	ENSMUSG00000043004	protein_coding	intronic
10	63710000	63711000	Peak_346	86.7527	.	Ctnna3	ENSMUSG00000060843	protein_coding	intronic
13	11555400	11555600	Peak_347	86.4132	.	Ryr2	ENSMUSG00000021313	protein_coding	CDS
16	43870200	43870400	Peak_348	86.2066	.	Qtrtd1	ENSMUSG00000022704	protein_coding	intronic
1	168361000	168361600	Peak_349	86.1271	.	Pbx1	ENSMUSG00000052534	protein_coding	intronic
18	45352600	45353000	Peak_350	86.0862	.	Kcnn2	ENSMUSG00000054477	protein_coding	intronic
10	111483000	111483400	Peak_351	86.0579	.	Nap1l1	ENSMUSG00000058799	protein_coding	intronic
6	119114400	119114600	Peak_352	86.0574	.	Cacna1c	ENSMUSG00000051331	protein_coding	intronic
10	64617800	64618200	Peak_353	85.7561	.	Ctnna3	ENSMUSG00000060843	protein_coding	intronic
13	114037600	114037800	Peak_354	85.459	.	Arl15	ENSMUSG00000042348	protein_coding	intronic
1	126829800	126830000	Peak_355	85.2686	.	Nckap5	ENSMUSG00000049690	protein_coding	intronic
7	112353800	112355000	Peak_356	85.1585	.	Mical2	ENSMUSG00000038244	protein_coding	three_prime_utr
1	59663600	59663800	Peak_357	85.0856	.	Sumo1	ENSMUSG00000026021	protein_coding	intronic
1	168413800	168414400	Peak_358	84.8415	.	Pbx1	ENSMUSG00000052534	protein_coding	intronic
17	74632000	74632200	Peak_359	84.672	.	Birc6	ENSMUSG00000024073	protein_coding	intronic
4	82435200	82435800	Peak_360	84.542	.	Nfib	ENSMUSG00000008575	protein_coding	intronic
1	134933800	134934000	Peak_361	84.4426	.	Ppp1r12b	ENSMUSG00000073557	protein_coding	intronic
7	45433800	45434000	Peak_362	84.4104	.	Ruvbl2	ENSMUSG00000003868	protein_coding	intronic
6	32439200	32439400	Peak_363	84.4104	.	Plxna4	ENSMUSG00000029765	protein_coding	intronic
2	130507200	130507400	Peak_364	84.2903	.	Ptpra	ENSMUSG00000027303	protein_coding	intronic
8	86706000	86706400	Peak_365	84.2364	.	Lonp2	ENSMUSG00000047866	protein_coding	intronic
15	88708800	88709000	Peak_366	84.1907	.	Brd1	ENSMUSG00000022387	protein_coding	intronic
13	11819600	11821000	Peak_367	84.1455	.	Ryr2	ENSMUSG00000021313	protein_coding	intronic
16	35170200	35170600	Peak_368	83.629	.	Adcy5	ENSMUSG00000022840	protein_coding	intronic
6	119143200	119144200	Peak_369	83.5807	.	Cacna1c	ENSMUSG00000051331	protein_coding	intronic
14	116942600	116943200	Peak_370	83.4209	.	Gpc6	ENSMUSG00000058571	protein_coding	intronic
X	20640200	20641000	Peak_371	83.3718	.	Rbm10	ENSMUSG00000031060	protein_coding	intronic
4	56874000	56875200	Peak_372	83.3682	.	Tmem245	ENSMUSG00000055296	protein_coding	three_prime_utr
4	45445200	45445600	Peak_373	83.3504	.	Shb	ENSMUSG00000044813	protein_coding	intronic
1	168304800	168306600	Peak_374	83.2851	.	Pbx1	ENSMUSG00000052534	protein_coding	intronic
17	10256800	10257400	Peak_375	83.1891	.	Qk	ENSMUSG00000062078	protein_coding	intronic
3	63979000	63979200	Peak_376	83.1153	.	Gmps	ENSMUSG00000027823	protein_coding	intronic
7	16547600	16548200	Peak_377	83.0376	.	Arhgap35	ENSMUSG00000058230	protein_coding	intronic
X	142686800	142687400	Peak_378	82.757	.	Tmem164	ENSMUSG00000047045	protein_coding	intronic
2	7039800	7040200	Peak_379	82.1083	.	Celf2	ENSMUSG00000002107	protein_coding	intronic
2	163390000	163391200	Peak_380	81.9546	.	Jph2	ENSMUSG00000017817	protein_coding	intronic
6	33375000	33375400	Peak_381	81.7792	.	Exoc4,Gm13854	ENSMUSG00000029763,ENSMUSG00000083728	protein_coding,processed_pseudogene	intronic,exonic
4	102272200	102273400	Peak_382	81.7645	.	Pde4b	ENSMUSG00000028525	protein_coding	intronic
3	67386000	67387400	Peak_383	81.7254	.	Mlf1	ENSMUSG00000048416	protein_coding	intronic
8	36651400	36652000	Peak_384	81.5105	.	Dlc1	ENSMUSG00000031523	protein_coding	intronic
16	77609600	77610000	Peak_385	81.5068	.	Mir99ahg	ENSMUSG00000090386	processed_transcript	intronic
X	135772600	135773000	Peak_386	81.1655	.	Gprasp1	ENSMUSG00000043384	protein_coding	intronic
2	14846400	14846600	Peak_387	80.8847	.	Cacnb2	ENSMUSG00000057914	protein_coding	intronic
7	28433200	28435600	Peak_388	80.865	.	Samd4b	ENSMUSG00000109336	protein_coding	intronic
4	133737000	133738000	Peak_389	80.8182	.	Arid1a	ENSMUSG00000007880	protein_coding	intronic
6	119155800	119157600	Peak_390	80.5345	.	Cacna1c	ENSMUSG00000051331	protein_coding	intronic
X	169725800	169726000	Peak_391	80.5005	.	Mid1	ENSMUSG00000035299	protein_coding	intronic
6	97961600	97962200	Peak_392	80.3817	.	Mitf	ENSMUSG00000035158	protein_coding	intronic
1	168370800	168371200	Peak_393	80.2975	.	Pbx1	ENSMUSG00000052534	protein_coding	intronic
16	5793200	5793400	Peak_394	79.9671	.	intergenic	intergenic	intergenic	intergenic
12	53074200	53074600	Peak_395	79.9365	.	Akap6	ENSMUSG00000061603	protein_coding	intronic
2	157012600	157013800	Peak_396	79.8709	.	intergenic	intergenic	intergenic	intergenic
18	25043000	25044200	Peak_397	79.8469	.	Fhod3	ENSMUSG00000034295	protein_coding	intronic
6	97977200	97978200	Peak_398	79.787	.	Mitf	ENSMUSG00000035158	protein_coding	intronic
1	39927000	39927600	Peak_399	79.6938	.	Map4k4	ENSMUSG00000026074	protein_coding	intronic
7	49549000	49549600	Peak_400	79.5972	.	Nav2	ENSMUSG00000052512	protein_coding	intronic
11	22084000	22085000	Peak_401	79.5948	.	Ehbp1	ENSMUSG00000042302	protein_coding	intronic
3	149289600	149289800	Peak_402	79.5278	.	Gm30382	ENSMUSG00000106515	lincRNA	intronic
3	56174200	56174400	Peak_403	79.2787	.	Nbea	ENSMUSG00000027799	protein_coding	intronic
1	157476400	157476600	Peak_404	79.1965	.	BC026585	ENSMUSG00000033488	protein_coding	intronic
4	56871800	56873600	Peak_405	79.0141	.	Tmem245	ENSMUSG00000055296	protein_coding	three_prime_utr
14	47059400	47059800	Peak_406	78.8622	.	Samd4	ENSMUSG00000021838	protein_coding	intronic
10	64119800	64120200	Peak_407	78.8592	.	Ctnna3	ENSMUSG00000060843	protein_coding	intronic
17	86189200	86189800	Peak_408	78.6994	.	Prkce	ENSMUSG00000045038	protein_coding	intronic
6	83768800	83770200	Peak_409	78.6932	.	Tex261	ENSMUSG00000014748	protein_coding	three_prime_utr
5	132250400	132252000	Peak_410	78.6792	.	Auts2	ENSMUSG00000029673	protein_coding	intronic
10	64102200	64103000	Peak_411	78.507	.	Ctnna3	ENSMUSG00000060843	protein_coding	intronic
10	64092600	64094200	Peak_412	78.4485	.	Ctnna3	ENSMUSG00000060843	protein_coding	intronic
10	45283600	45284200	Peak_413	78.4282	.	Popdc3	ENSMUSG00000019848	protein_coding	intronic
3	79097400	79097600	Peak_414	78.2416	.	Rapgef2	ENSMUSG00000062232	protein_coding	intronic
2	60078200	60078600	Peak_415	78.0475	.	Baz2b	ENSMUSG00000026987	protein_coding	intronic
X	159964000	159965800	Peak_416	77.974	.	Sh3kbp1	ENSMUSG00000040990	protein_coding	intronic
8	90337400	90337600	Peak_417	77.8852	.	Tox3	ENSMUSG00000043668	protein_coding	intronic
6	37415000	37415400	Peak_418	77.7344	.	Creb3l2	ENSMUSG00000038648	protein_coding	intronic
8	61543600	61544600	Peak_419	77.6807	.	Palld	ENSMUSG00000058056	protein_coding	intronic
6	119149200	119150200	Peak_420	77.6682	.	Cacna1c	ENSMUSG00000051331	protein_coding	intronic
12	52952800	52953400	Peak_421	77.6409	.	Akap6	ENSMUSG00000061603	protein_coding	intronic
8	85927600	85927800	Peak_422	77.559	.	Phkb	ENSMUSG00000036879	protein_coding	intronic
3	30181000	30181400	Peak_423	77.4435	.	Mecom	ENSMUSG00000027684	protein_coding	intronic
7	130738400	130739200	Peak_424	77.1633	.	Tacc2	ENSMUSG00000030852	protein_coding	intronic
6	32794800	32796000	Peak_425	76.7748	.	Chchd3	ENSMUSG00000053768	protein_coding	intronic
10	64039000	64040600	Peak_426	76.7305	.	Ctnna3,Lrrtm3	ENSMUSG00000060843,ENSMUSG00000042846	protein_coding	intronic
2	91889200	91889800	Peak_427	76.7269	.	Ambra1	ENSMUSG00000040506	protein_coding	intronic
18	16736000	16736800	Peak_428	76.1087	.	Cdh2	ENSMUSG00000024304	protein_coding	intronic
18	50021200	50021400	Peak_429	75.821	.	Tnfaip8	ENSMUSG00000062210	protein_coding	intronic
3	104830000	104830600	Peak_430	75.6073	.	Capza1	ENSMUSG00000070372	protein_coding	intronic
10	120852600	120853200	Peak_431	75.4061	.	Msrb3	ENSMUSG00000051236	protein_coding	intronic
[truncated: 1,784 more rows]

## Sheet: Matr3_WT_GO_analysis
geneSet	description	link	size	overlap	expect	enrichmentRatio	pValue	FDR	overlapId	userId
[truncated: 10 more rows]

[truncated: 4 more sheets: Matr3-Ip1_CharmeKO_over_input, Matr3-Ip2_CharmeKO_over_input, Peaks_annotation_Matr3_CharmeKO, DiffBind]
