# Supplementary material for: The long noncoding RNA Charme supervises cardiomyocyte maturation by controlling cell differentiation programs in the developing heart
Source: eLife. 2023 Mar 6;12:e81360. doi: 10.7554/eLife.81360 (PMC10023161; doi:10.7554/eLife.81360)
Supplement: Supplementary file 5. [file elife-81360-supp5.xlsx]

## Sheet: Feuil1
List and sequences of the oligonucleotides, siRNAs, antibodies and imaging probes used.
qRT-PCR
Name	Sequence
Charme ex1 FW	5'-ggcacagacaccaaggccag-3'
Charme int1 FW	5'-tttctgtttgccctggacac-3'
Charme ex2 RV	5' - gcactcttccttctctccga- 3'
GAPDH FW	5'-tgacgtgccgcctggagaaa-3'
GAPDH RV	5'-agtgtagcccaagatgcccttcag-3'
pre-GAPDH FW	5'-ggctcatggtatgtaggcagt-3'
pre-GAPDH RV	5'-gaaaacacgggggcaatgagt-3'
Ki-67 FW	5' -GAGAAAATCCTGTCACTCCAGA- 3'
Ki-67 RV	5' -ACTTGGGCCTTGGCTGTTTT- 3'
Ccnb1 FW	5' -ATGTTTCCATCGGGCTTGGA-3'
Ccnb1 RV	5' -GCCTGAGCCTGAACCTGAAC-3'
Ccna2 FW	5' -CAAACTCTGCTACTTCTGGG -3'
Ccna2 RV	5' -CCATGTCTGTGTTAAGAGGG -3'
Birc5 FW	5' -CCTCAAGAACTACCGCATCG-3'
Birc5 RV	5' -TCTCGGTAGGGCAGTGGATG-3'
Bub1 FW	5' -GCAGCGAATACCACATACTG -3'
Bub1 RV	5' -AAGCCCTTAGGAGCTAGGAC -3'
Spdl1 FW	5' -AGGGCATGCTTCTCTTGGTT -3'
Spdl1 RV	5' -TGCACACTATGGCCTACAGC -3'
Jup FW	5' -ACCCTAAGTTCCTGGCCATC- 3'
Jup RV	5' -GCTGTAGTTCCTCATGATCTGC- 3'
Myo18B FW	5' -TCATACTGTCTCGAAGCCGGA -3'
Myo18B RV	5' -AGCAGACAGGAAGCCATCATC -3'
Cacna1c FW	5' -CCCCTGCTGTCACTCTGATA - 3'
Cacna1c RV	5' -CTATGAAGGAGGCGGTGTCT - 3'
Smad3 FW	5' -AGGCGGCAGTAGATAACGTG -3'
Smad3 RV	5'- CGCAGAACGTGAACACCAAG -3'
Notch3 FW	5'- AAAAGGAGCCCACGCCATCC -3'
Notch3 RV	5'- TGCATCTGCCACAGGGGATA -3'
Cul7 FW	5' -AGGCCGGATGATCCAAGCTC -3'
Cul7 RV	5' -CCAGGTGCTTTTCAATGGCC -3'
MATR3 FW	5' -ggttatccccatctgtgctct -3'
MATR3 RV	5' -catcgacgactgtgacttgc -3'
RBM20 FW	5' -TGAACGATTTCCGAGGCTTG -3'
RBM20 RV	5' -CATGCAGCTTCCCTTTCACA -3'
TBX20 CLIP FW	5' -GTTTGCCAAAGGATTCCGGG- 3'
TBX20 CLIP RV	5'- TGGATGGAAAGGTGCAGAGA -3'
Cacna1c CLIP FW	5'- GAAGTTCAAGGGCAAGGTGG -3'
Cacna1c CLIP RV	5'- AGCTCTCACCTCACTTGTCT -3'
Myo18B CLIP FW	5'- CAGCAGCTCTTTCCACAGTC -3'
Myo18B CLIP RV	5'- AGCAGGAGTCTTTGAGCTGT -3'
GATA4 CLIP FW	5'- GAGATCGCGCCGGTTTTC -3'
GATA4 CLIP RV	5'- TTGTGAGTTTCTCCTGCCCC -3'
Charme_Up-BamHI	5' -AAAGGATCCGAATGAGGCCTGGAAGCAGGAAGC -3'
Charme_Down-EcoRI	5' -AAAGAATTCGTGCCTAGTATAGCTGGGTT -3'
siRNA
Name	Sequence
Si-SCR	D-001810-10-05 ON-TARGET plus Control pool Non-Targeting pool
Si-MATR3	L-059433-01-0005 ON-TARGET plus Mouse Matr3 (17184) siRNA- SMARTpool
in situ hybridization
probe for Charme	ACD Bio-Techne custom probe: BA-Mm-5430431A17Rik-202-O1-1zz-st (ref. 1136321-C1)
reagents	RNAscope™ pre-processing reagents (ref.322381)
	Basescope™ detection reagents V2– RED (ref. 323910)
	RNAscope Wash Buffer Reagents (ref. 310091)
Antibodies		Diluition
TnnT2	ThermoFisher Scientific cat#MA5-12960	1:100
MATR3	Bethyl cat#A300-591A	1:250
KI-67	Abcam cat#ab15580	1:100
Nppa	Proteintech cat#27426-1-AP	1:100
Lectin	Sigma-Aldrich cat#L9381	1:80
𝛽-Actin	Sigma-Aldrich cat#A3854-200UL	1:1000
GAPDH	Santa Cruz Biotechnology (6C5) sc-32233	1:1000
Map2	Abcam cat#5392	1:300
