# Supplementary figures and images for: The long noncoding RNA Charme supervises cardiomyocyte maturation by controlling cell differentiation programs in the developing heart
Source: eLife journal article supplement (doi:10.7554/elife.81360), 2023-03-06

**Figure 3-figure supplement 1**

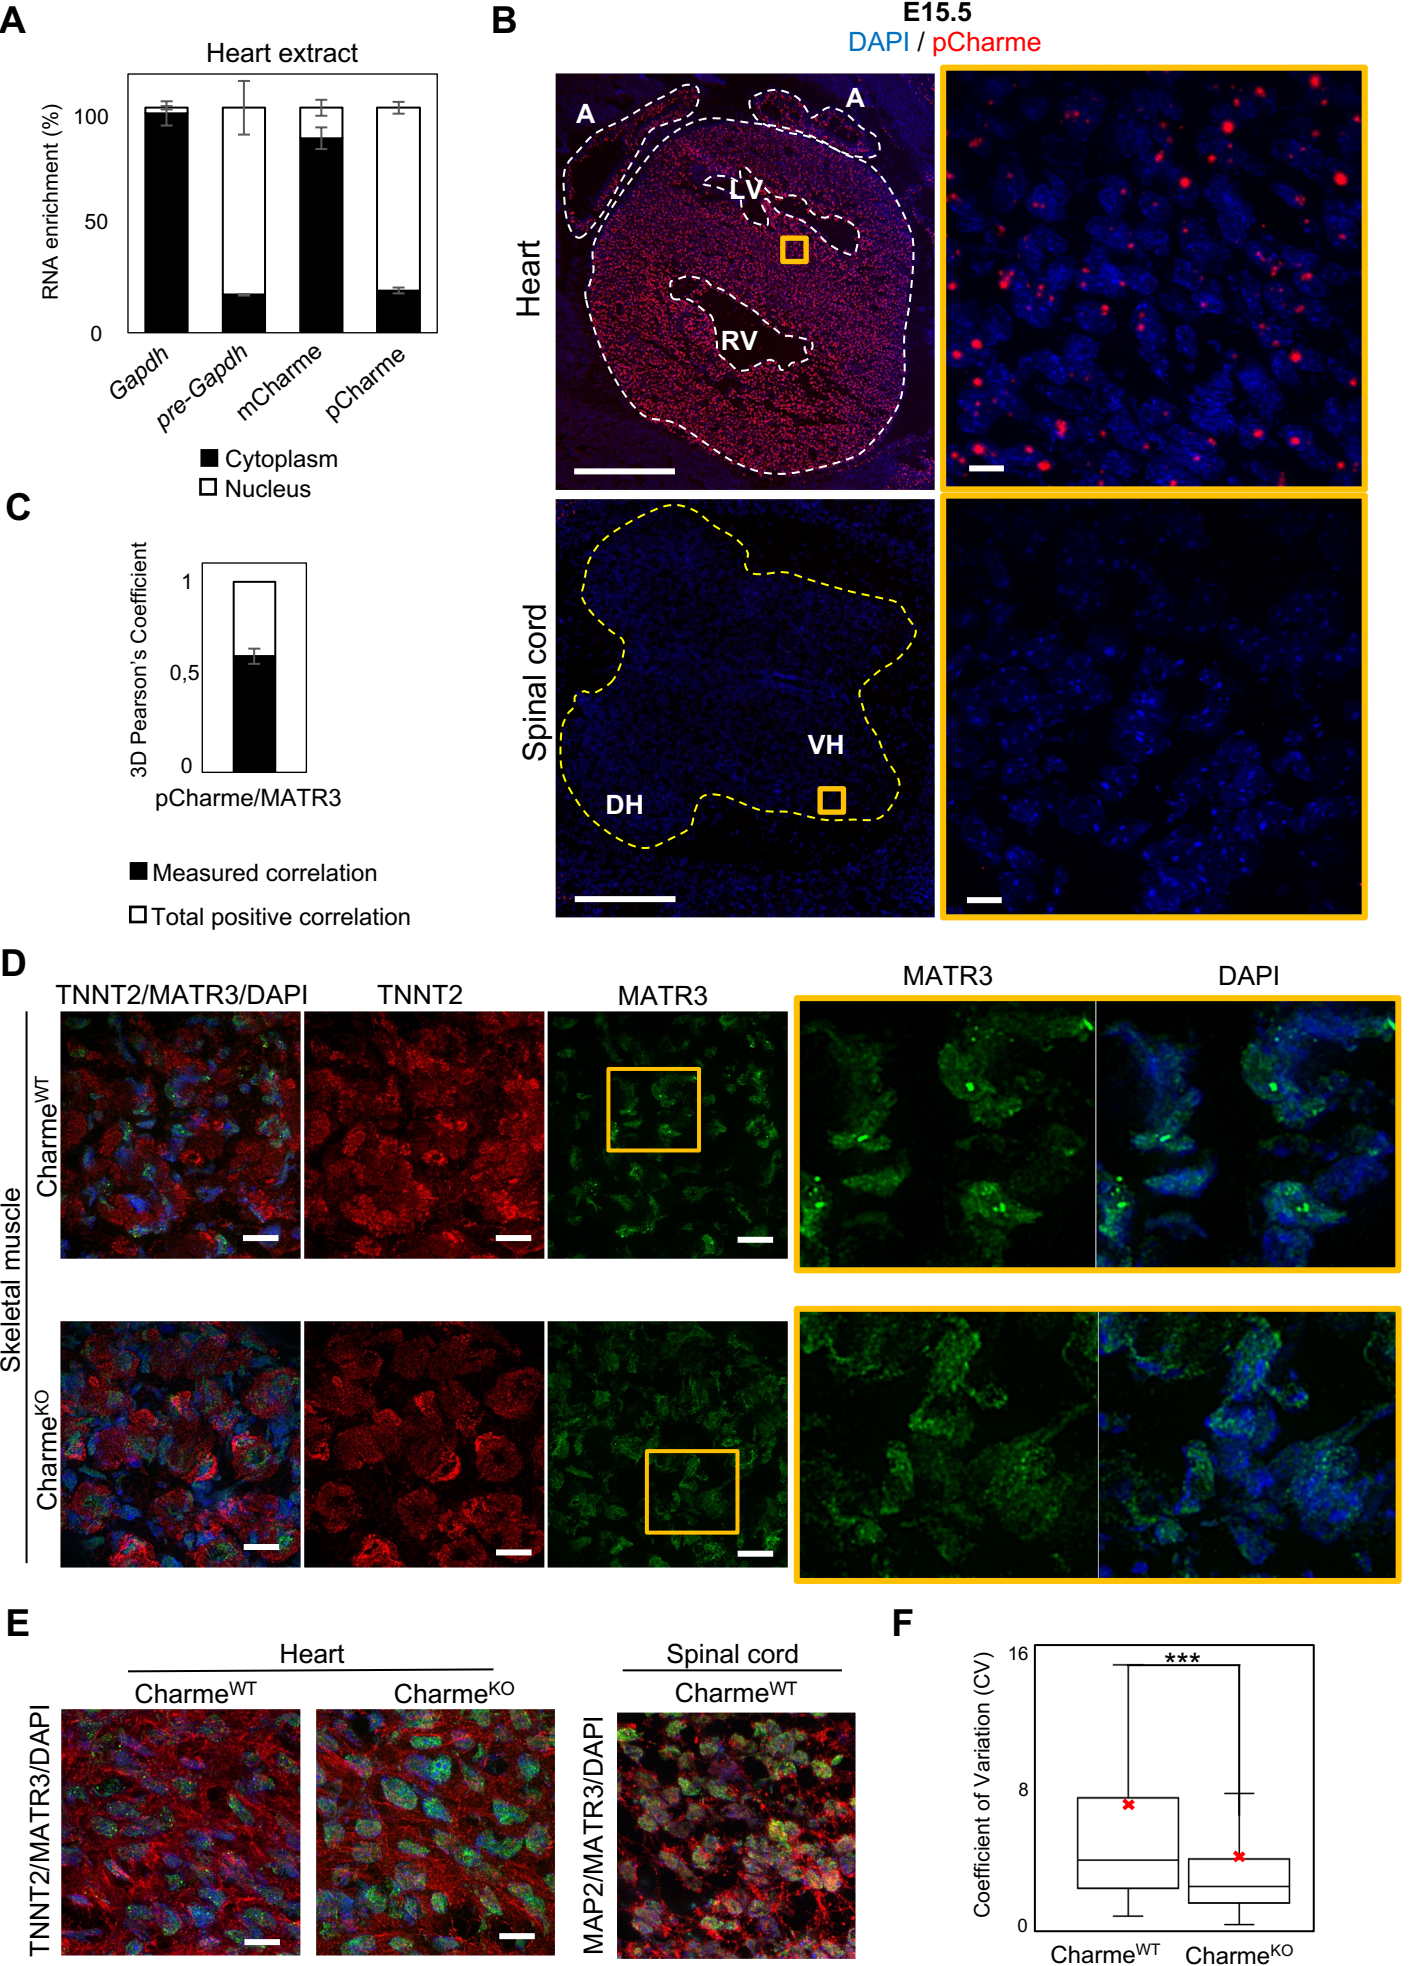

Supplement: supp [file elife-81360-supp-v1.zip]

Figure 1-figure supplement 1

A

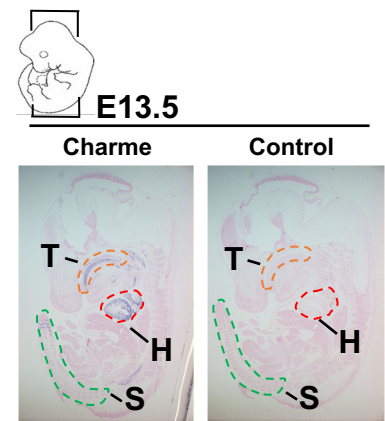

B

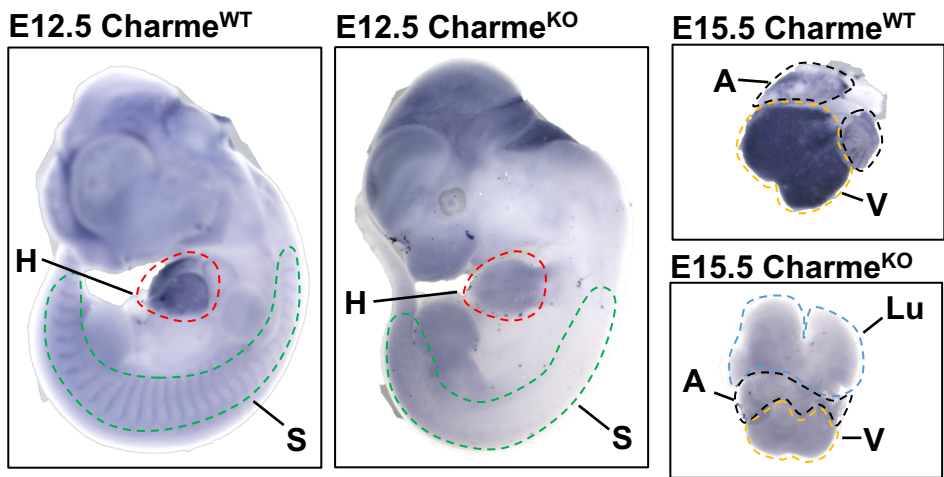

C

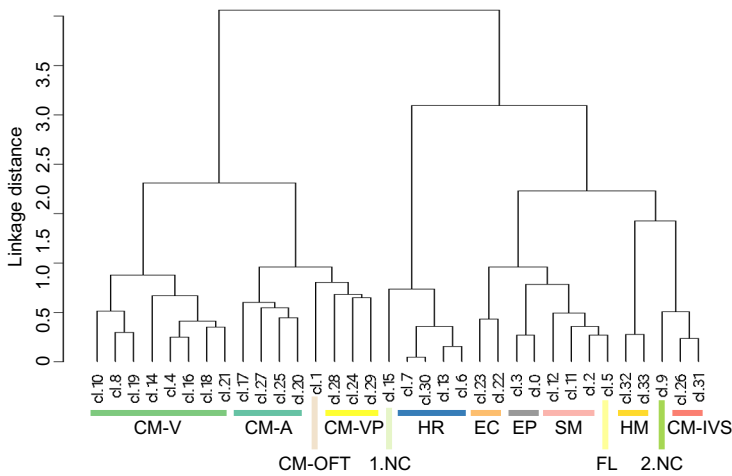

D

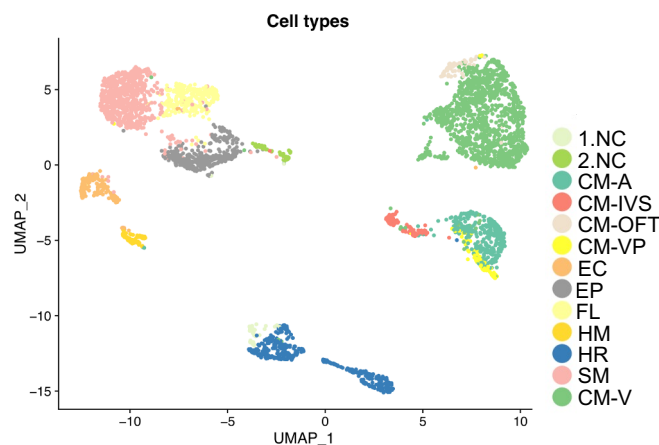

E

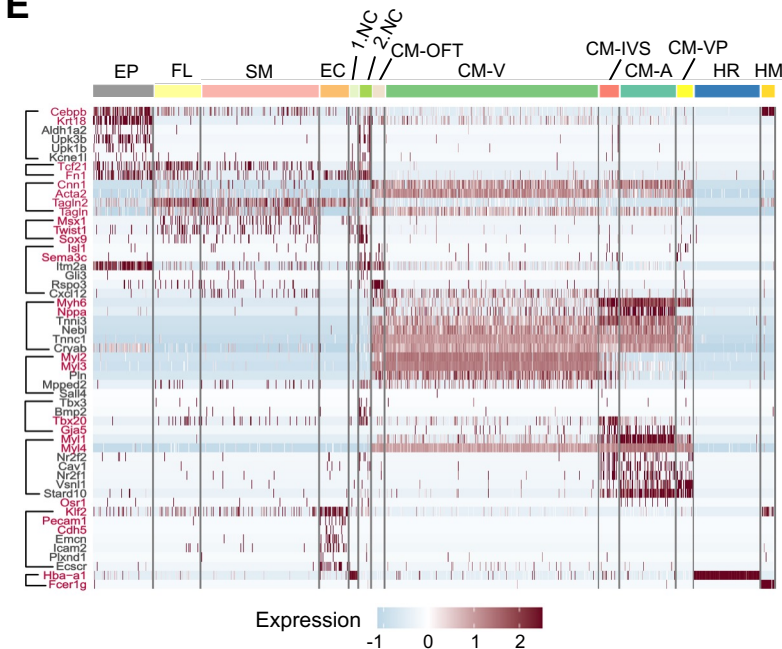

F

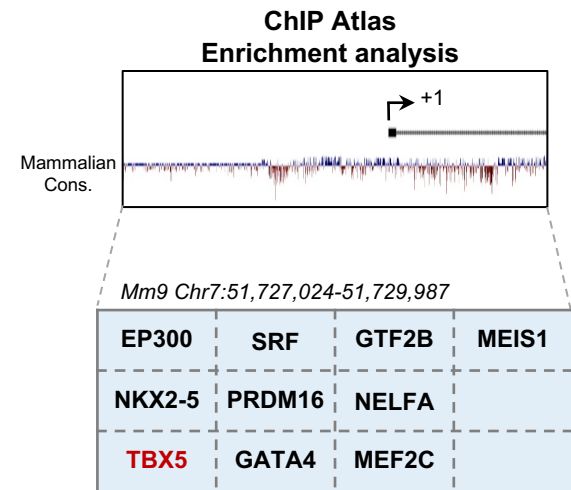

Supplement: supp [file elife-81360-supp-v1.zip]

Figure 4-figure supplement 1

A

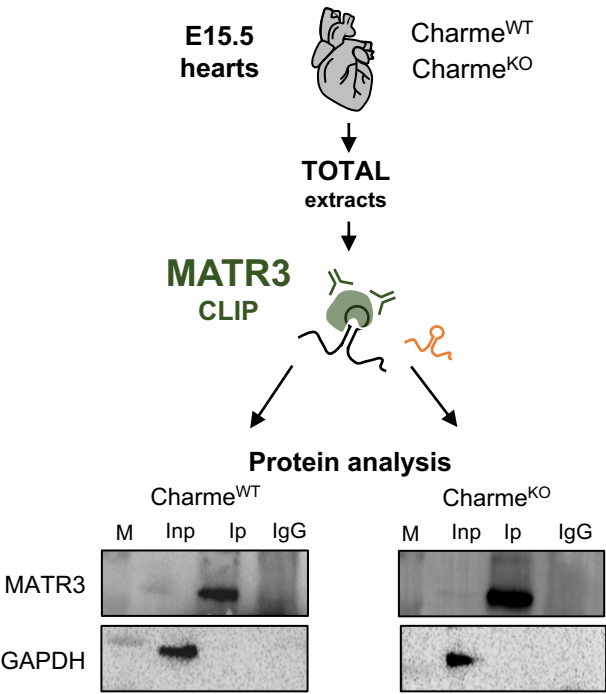

B

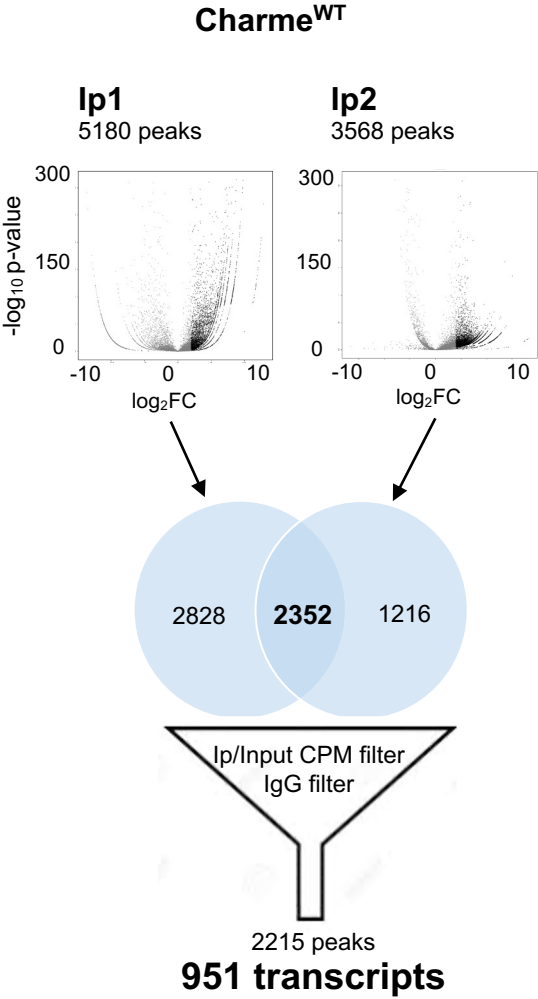

C

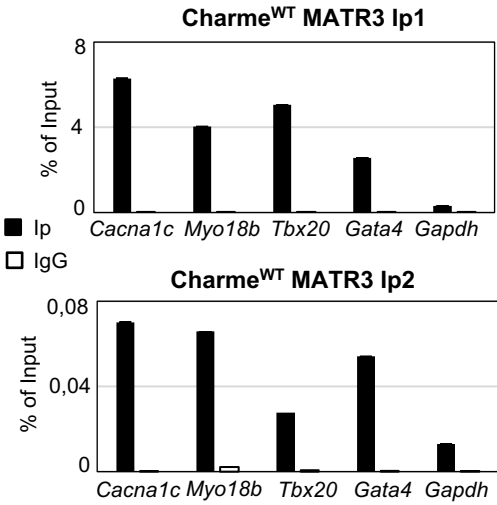

D

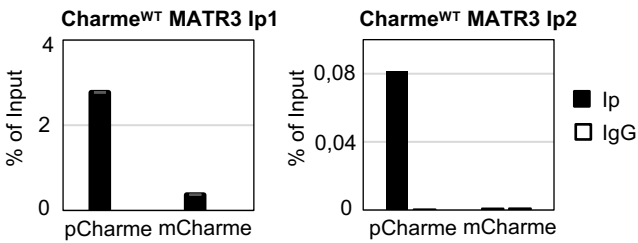

Supplement: supp [file elife-81360-supp-v1.zip]

Figure 5-figure supplement 1

A

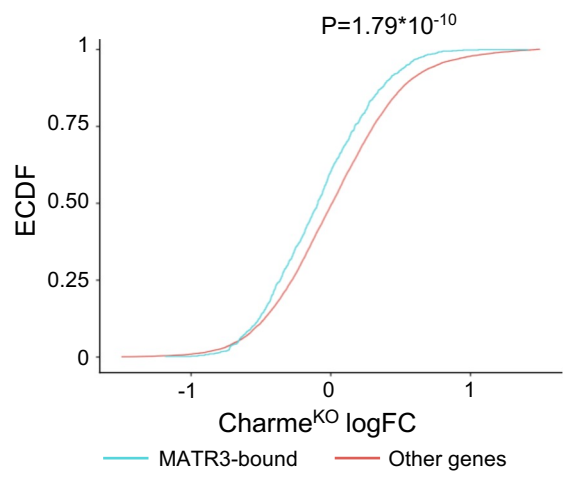

B

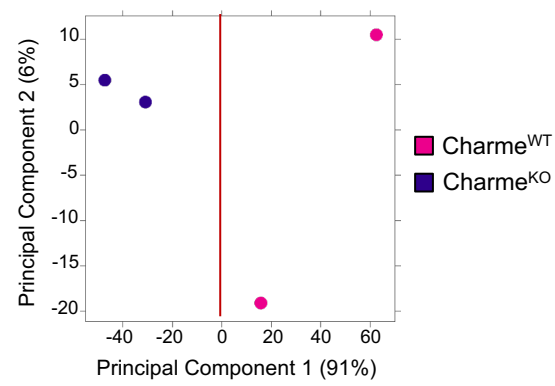

C

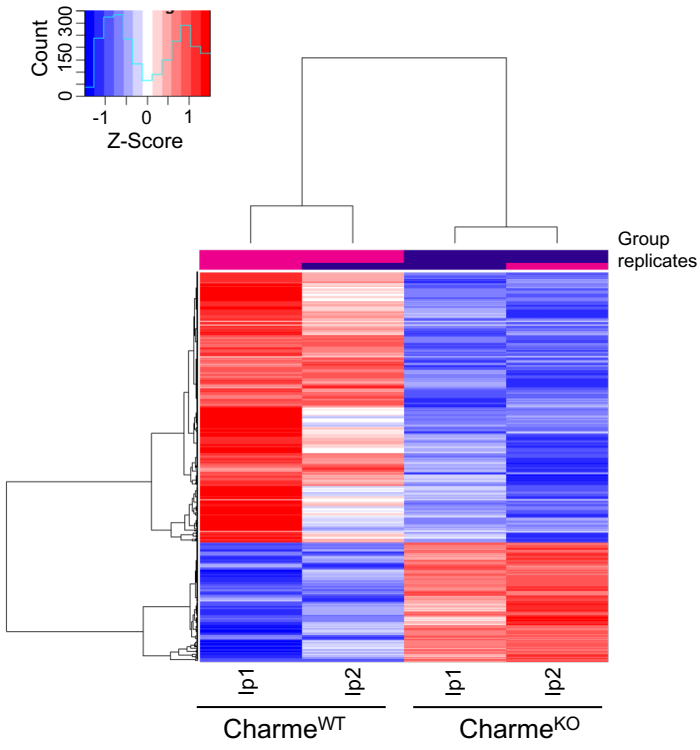

D

Charme<sup>WT</sup> vs Charme<sup>KO</sup> MATR3 IP peaks

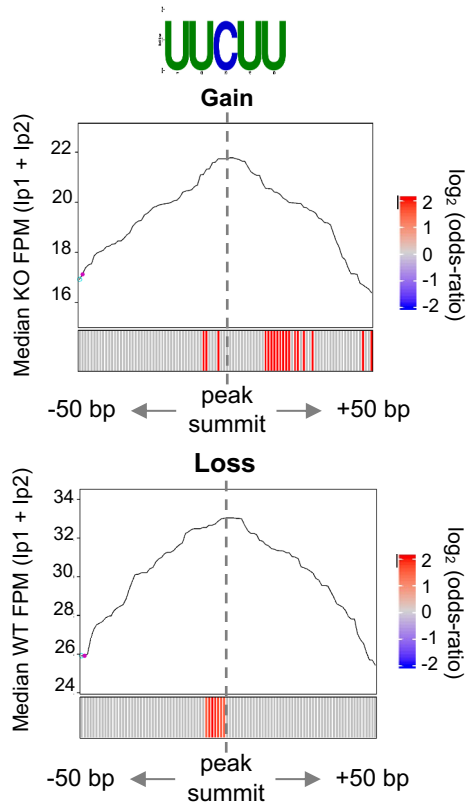

Supplement: supp [file elife-81360-supp-v1.zip]

# Figure 2-figure supplement 1

**A**

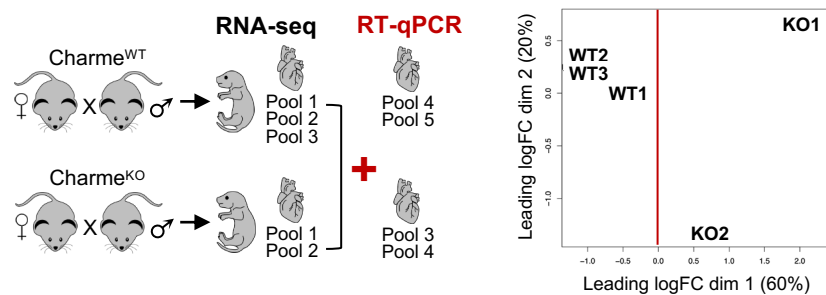

**C**

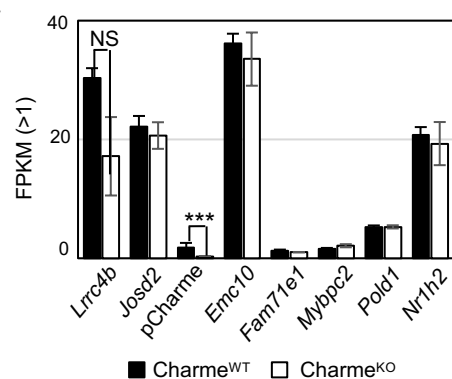

**B**

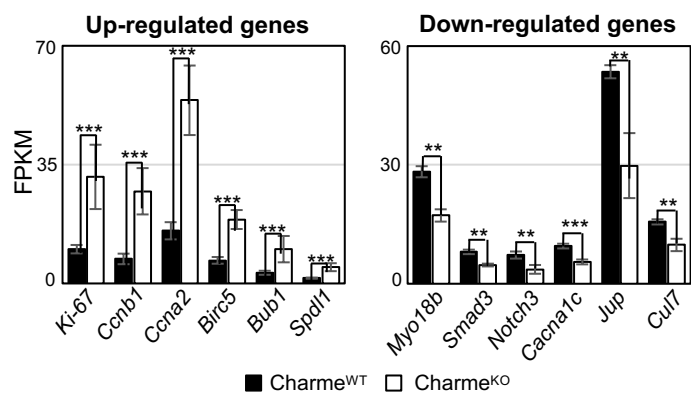

**D**

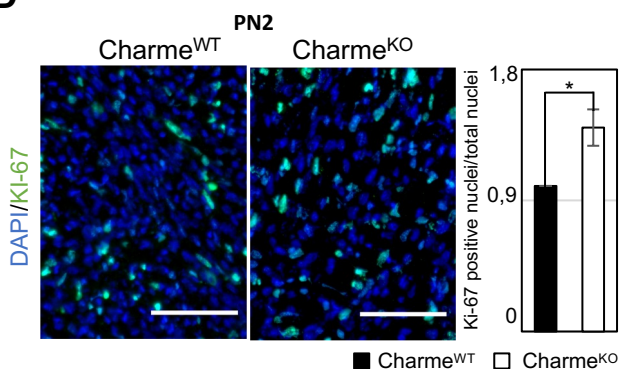

**E**

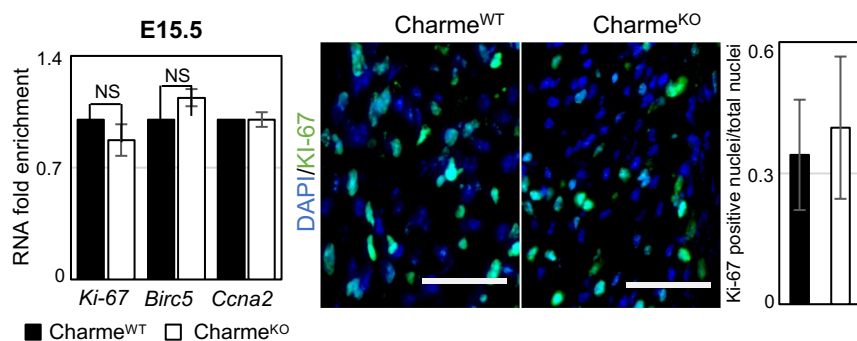

**H**

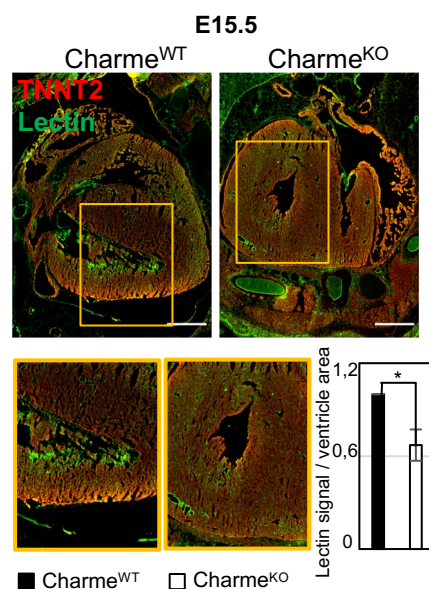

**F**

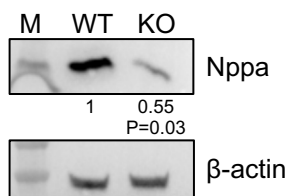

**G**

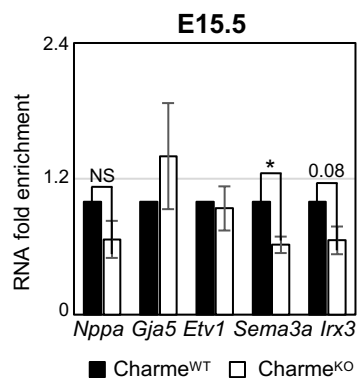

**I**

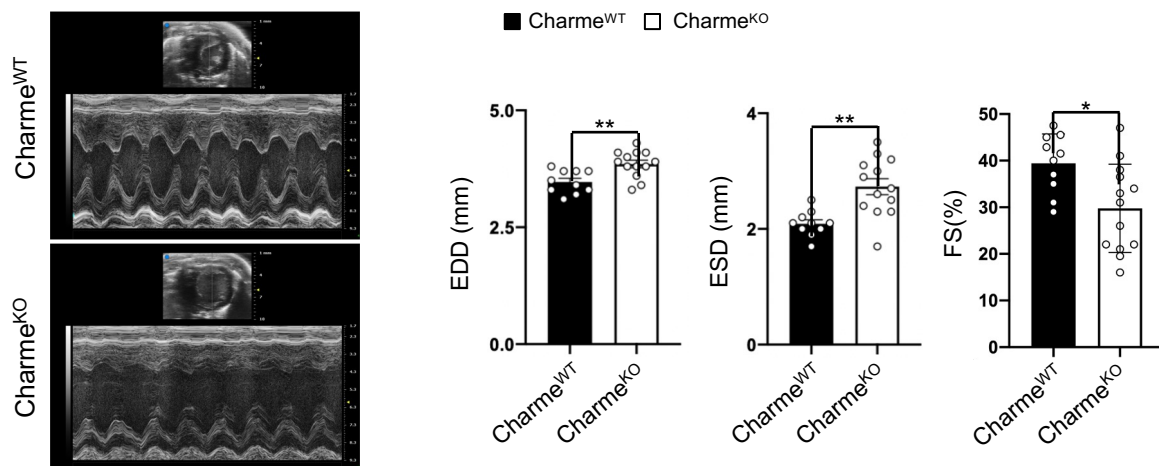

Supplement: supp [file elife-81360-supp-v1.zip]
